# Supplementary material for: UBQLN2 restrains the domesticated retrotransposon PEG10 to maintain neuronal health in ALS
Source: eLife journal article supplement (doi:10.7554/elife.79452), 2023-03-23
Supplement: supp [file elife-79452-supp-v1.zip]

Archive with 18 entries (18 files):
- elife_poa_e79452_Figure_1_figure_supplement_1.pdf
- elife_poa_e79452_Figure_2_figure_supplement_1.pdf
- elife_poa_e79452_Figure_6_figure_supplement_1.pdf
- elife_poa_e79452_Figure_8_figure_supplement_1.pdf
- elife_poa_e79452_Figure_1_source_data_1.pdf
- elife_poa_e79452_Figure_1Figure_1_figure_supplement_1_source_data_2.pdf
- elife_poa_e79452_Figure_1_figure_supplement_1_source_data_1.pdf
- elife_poa_e79452_Figure_1_figure_supplement_1_source_data_2.pdf
- elife_poa_e79452_Figure_3_source_data_1.pdf
- elife_poa_e79452_Figure_4_source_data_1.pdf
- elife_poa_e79452_Figure_4_source_data_2.pdf
- elife_poa_e79452_Figure_4_source_data_3.pdf
- elife_poa_e79452_Figure_4_source_data_4.pdf
- elife_poa_e79452_Figure_4_source_data_5.pdf
- elife_poa_e79452_Figure_4_source_data_6.pdf
- elife_poa_e79452_Figure_6_source_data_1.xlsx
- elife_poa_e79452_Figure_8_source_data_1.xlsx
- elife_poa_e79452_Source_data_1.zip
