# Supplementary material for: UBQLN2 restrains the domesticated retrotransposon PEG10 to maintain neuronal health in ALS
Source: eLife journal article supplement (doi:10.7554/elife.79452), 2023-03-23

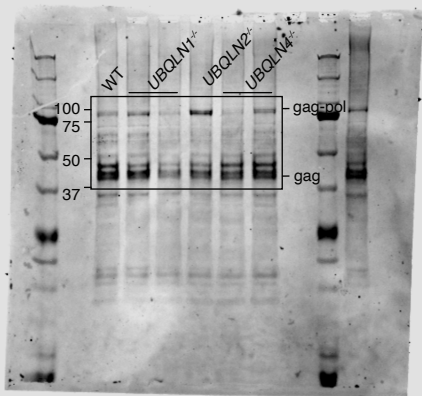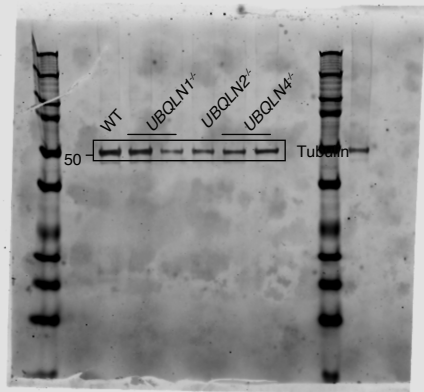

Supplement: supp [file elife-79452-supp-v1.zip]
