# Supplementary material for: UBQLN2 restrains the domesticated retrotransposon PEG10 to maintain neuronal health in ALS
Source: eLife journal article supplement (doi:10.7554/elife.79452), 2023-03-23
Supplement: supp [file elife-79452-supp-v1.zip › elife_poa_e79452_Figure_8_source_data_1.xlsx]

## Sheet: a) Human sample metadata
Mass spec identifier	TMT label	Tissue sample ID	Spike	ALS	UBQLN2
Reporter 1	126C	T5395/3 (CU18)		Yes	3' SNP unknown significance
Reporter 2	127N	109		Yes	None
Reporter 3	127C	JHU 89		Yes	None
Reporter 4	128N	T5404		No	None
Reporter 5	128C	JHU 90		Yes	None
Reporter 6	129N	JHU 106		Yes	P497H
Reporter 7	129C	107		Yes	3' SNP unknown significance
Reporter 8	130N	T5180		No	None
Reporter 9	130C	T5393/5 (CU19)		Yes	None
Reporter 10	131N	GWF16 18	+	Yes	3' SNP unknown significance

## Sheet: b) Parameters
Parameter	Value
Version	1.6.14.0
User name	Mass Spec
Machine name	PD
Date of writing	2021-11-18 19:25:39
Include contaminants	TRUE
PSM FDR	0.01
PSM FDR Crosslink	0.01
Protein FDR	0.01
Site FDR	0.01
Use Normalized Ratios For Occupancy	TRUE
Min. peptide Length	7
Min. score for unmodified peptides	0
Min. score for modified peptides	40
Min. delta score for unmodified peptides	0
Min. delta score for modified peptides	6
Min. unique peptides	0
Min. razor peptides	1
Min. peptides	1
Use only unmodified peptides and	TRUE
Modifications included in protein quantification	Oxidation (M);Acetyl (Protein N-term)
Peptides used for protein quantification	Razor
Discard unmodified counterpart peptides	TRUE
Label min. ratio count	2
Use delta score	FALSE
iBAQ	FALSE
iBAQ log fit	FALSE
Match between runs	FALSE
Find dependent peptides	FALSE
Fasta file	C:\Users\Mass Spec\Desktop\MaxQuant\Fasta files\uniprot-proteome_UP000005640.fasta
Decoy mode	revert
Include contaminants	TRUE
Advanced ratios	TRUE
Fixed andromeda index folder
Combined folder location
Second peptides	TRUE
Stabilize large LFQ ratios	TRUE
Separate LFQ in parameter groups	FALSE
Require MS/MS for LFQ comparisons	TRUE
Calculate peak properties	FALSE
Main search max. combinations	200
Advanced site intensities	TRUE
Write msScans table	FALSE
Write msmsScans table	TRUE
Write ms3Scans table	TRUE
Write allPeptides table	TRUE
Write mzRange table	TRUE
Write DIA fragments table	FALSE
Write pasefMsmsScans table	TRUE
Write accumulatedPasefMsmsScans table	TRUE
Max. peptide mass [Da]	4600
Min. peptide length for unspecific search	8
Max. peptide length for unspecific search	25
Razor protein FDR	TRUE
Disable MD5	FALSE
Max mods in site table	3
Match unidentified features	FALSE
Epsilon score for mutations
Evaluate variant peptides separately	TRUE
Variation mode	None
MS/MS tol. (FTMS)	20 ppm
Top MS/MS peaks per Da interval. (FTMS)	12
Da interval. (FTMS)	100
MS/MS deisotoping (FTMS)	TRUE
MS/MS deisotoping tolerance (FTMS)	7
MS/MS deisotoping tolerance unit (FTMS)	ppm
MS/MS higher charges (FTMS)	TRUE
MS/MS water loss (FTMS)	TRUE
MS/MS ammonia loss (FTMS)	TRUE
MS/MS dependent losses (FTMS)	TRUE
MS/MS recalibration (FTMS)	FALSE
MS/MS tol. (ITMS)	0.5 Da
Top MS/MS peaks per Da interval. (ITMS)	8
Da interval. (ITMS)	100
MS/MS deisotoping (ITMS)	FALSE
MS/MS deisotoping tolerance (ITMS)	0.15
MS/MS deisotoping tolerance unit (ITMS)	Da
MS/MS higher charges (ITMS)	TRUE
MS/MS water loss (ITMS)	TRUE
MS/MS ammonia loss (ITMS)	TRUE
MS/MS dependent losses (ITMS)	TRUE
MS/MS recalibration (ITMS)	FALSE
MS/MS tol. (TOF)	40 ppm
Top MS/MS peaks per Da interval. (TOF)	10
Da interval. (TOF)	100
MS/MS deisotoping (TOF)	TRUE
MS/MS deisotoping tolerance (TOF)	0.01
MS/MS deisotoping tolerance unit (TOF)	Da
MS/MS higher charges (TOF)	TRUE
MS/MS water loss (TOF)	TRUE
MS/MS ammonia loss (TOF)	TRUE
MS/MS dependent losses (TOF)	TRUE
MS/MS recalibration (TOF)	FALSE
MS/MS tol. (Unknown)	20 ppm
Top MS/MS peaks per Da interval. (Unknown)	12
Da interval. (Unknown)	100
MS/MS deisotoping (Unknown)	TRUE
MS/MS deisotoping tolerance (Unknown)	7
MS/MS deisotoping tolerance unit (Unknown)	ppm
MS/MS higher charges (Unknown)	TRUE
MS/MS water loss (Unknown)	TRUE
MS/MS ammonia loss (Unknown)	TRUE
MS/MS dependent losses (Unknown)	TRUE
MS/MS recalibration (Unknown)	FALSE
Site tables	Oxidation (M)Sites.txt

## Sheet: c) Global proteomics
Protein IDs	Majority protein IDs	Peptide counts (all)	Peptide counts (razor+unique)	Peptide counts (unique)	Protein names	Gene names	Fasta headers	Number of proteins	Peptides	Razor + unique peptides	Unique peptides	Sequence coverage [%]	Unique + razor sequence coverage [%]	Unique sequence coverage [%]	Mol. weight [kDa]	Sequence length	Sequence lengths	Q-value	Score	Reporter intensity corrected 1	Reporter intensity corrected 2	Reporter intensity corrected 3	Reporter intensity corrected 4	Reporter intensity corrected 5	Reporter intensity corrected 6	Reporter intensity corrected 7	Reporter intensity corrected 8	Reporter intensity corrected 9	Reporter intensity corrected 10	Intensity	MS/MS count	Only identified by site	Reverse	Potential contaminant	id	Peptide IDs	Peptide is razor	Mod. peptide IDs	Evidence IDs	MS/MS IDs	Best MS/MS	Oxidation (M) site IDs	Oxidation (M) site positions	Taxonomy IDs				Gene names
A0A075B7D4	A0A075B7D4	1	1	1		IGKV1OR2-108	tr|A0A075B7D4|A0A075B7D4_HUMAN Immunoglobulin kappa variable 1/OR2-108 (non-functional) (Fragment) OS=Homo sapiens OX=9606 GN=IGKV1OR2-108 PE=1 SV=1	1	1	1	1	12.8	12.8	12.8	12.535	117	117	0.0082542	1.2259	0	0	0	0	0	0	0	0	0	0	0	1				26	5372	TRUE	5787	11097	14987	14987			-1				IGKV1OR2-108
A0A494C0F0;A0A494C0J6;A0A087WTM4;A0A0A0MRH8;A0A494C1P7;A0A0A0MSH9;A0A494C1F7;Q86WJ1	A0A494C0F0;A0A494C0J6;A0A087WTM4;A0A0A0MRH8;A0A494C1P7;A0A0A0MSH9;A0A494C1F7;Q86WJ1	1;1;1;1;1;1;1;1	1;1;1;1;1;1;1;1	1;1;1;1;1;1;1;1	Chromodomain-helicase-DNA-binding protein 1-like	CHD1L	tr|A0A494C0F0|A0A494C0F0_HUMAN Chromodomain-helicase-DNA-binding protein 1-like OS=Homo sapiens OX=9606 GN=CHD1L PE=1 SV=1;tr|A0A494C0J6|A0A494C0J6_HUMAN Chromodomain-helicase-DNA-binding protein 1-like OS=Homo sapiens OX=9606 GN=CHD1L PE=1 SV=1;tr|A0A087W	8	1	1	1	3.8	3.8	3.8	33.411	293	293;365;377;745;792;825;880;897	0	10.456	0	0	0	0	0	0	0	0	0	0	0	1				46	9676	TRUE	10356	19120	25516	25516			-1;-1;-1;-1;-1;-1;-1;-1				CHD1L
A0A087WUA6;A6XGL0	A0A087WUA6;A6XGL0	1;1	1;1	1;1	YjeF N-terminal domain-containing protein 3	YJEFN3	tr|A0A087WUA6|A0A087WUA6_HUMAN YjeF N-terminal domain-containing protein 3 OS=Homo sapiens OX=9606 GN=YJEFN3 PE=1 SV=1;sp|A6XGL0|YJEN3_HUMAN YjeF N-terminal domain-containing protein 3 OS=Homo sapiens OX=9606 GN=YJEFN3 PE=1 SV=1	2	1	1	1	15.3	15.3	15.3	10.519	98	98;299	0.0018849	1.9222	0	0	0	0	0	0	0	0	0	0	0	1				62	54208	TRUE	58597	109915	146911	146911			-1;-1				YJEFN3
B0QY54;A0A087WUW0;Q9Y3M2	B0QY54;A0A087WUW0;Q9Y3M2	1;1;1	1;1;1	1;1;1	Protein chibby homolog 1	CBY1	tr|B0QY54|B0QY54_HUMAN Protein chibby homolog 1 (Fragment) OS=Homo sapiens OX=9606 GN=CBY1 PE=1 SV=1;tr|A0A087WUW0|A0A087WUW0_HUMAN Protein chibby homolog 1 OS=Homo sapiens OX=9606 GN=CBY1 PE=1 SV=1;sp|Q9Y3M2|CBY1_HUMAN Protein chibby homolog 1 OS=Homo sap	3	1	1	1	11.9	11.9	11.9	11.502	101	101;169;126	0	14.611	0	0	0	0	0	0	0	0	0	0	0	1				73	43346	TRUE	47027	88804	119200	119200			-1;-1;-1				CBY1
A0A087WZM8;Q8TBM7	A0A087WZM8;Q8TBM7	1;1	1;1	1;1	Transmembrane protein 254	TMEM254	tr|A0A087WZM8|A0A087WZM8_HUMAN Transmembrane protein 254 OS=Homo sapiens OX=9606 GN=TMEM254 PE=1 SV=1;sp|Q8TBM7|TM254_HUMAN Transmembrane protein 254 OS=Homo sapiens OX=9606 GN=TMEM254 PE=1 SV=1	2	1	1	1	10.9	10.9	10.9	11.139	101	101;123	0.0041111	1.5993	0	0	0	0	0	0	0	0	0	0	0	1				171	5518	TRUE	5944	11356	15312	15312			-1;-1				TMEM254
A0A087X059;B7Z6D5;Q96GQ7	A0A087X059;B7Z6D5;Q96GQ7	1;1;1	1;1;1	1;1;1	Probable ATP-dependent RNA helicase DDX27	DDX27	tr|A0A087X059|A0A087X059_HUMAN RNA helicase (Fragment) OS=Homo sapiens OX=9606 GN=DDX27 PE=1 SV=1;tr|B7Z6D5|B7Z6D5_HUMAN RNA helicase OS=Homo sapiens OX=9606 GN=DDX27 PE=1 SV=1;sp|Q96GQ7|DDX27_HUMAN Probable ATP-dependent RNA helicase DDX27 OS=Homo sapiens	3	1	1	1	4.4	4.4	4.4	30.209	275	275;765;796	0.0021689	1.8797	0	0	0	0	0	0	0	0	0	0	0	1				181	528	TRUE	559	983	1306	1306			-1;-1;-1				DDX27
E9PQZ9;H0YDY3;A0A087X2B2;E9PMH5;Q13490	E9PQZ9;H0YDY3;A0A087X2B2;E9PMH5;Q13490	1;1;1;1;1	1;1;1;1;1	1;1;1;1;1	Baculoviral IAP repeat-containing protein 2	BIRC2	tr|E9PQZ9|E9PQZ9_HUMAN Baculoviral IAP repeat-containing protein 2 (Fragment) OS=Homo sapiens OX=9606 GN=BIRC2 PE=1 SV=1;tr|H0YDY3|H0YDY3_HUMAN Baculoviral IAP repeat-containing protein 2 (Fragment) OS=Homo sapiens OX=9606 GN=BIRC2 PE=1 SV=1;tr|A0A087X2B2|	5	1	1	1	17.7	17.7	17.7	8.9019	79	79;262;534;597;618	0	22.297	0	0	0	0	0	0	0	0	0	0	0	1				221	58027	TRUE	62700	117549	157218	157218			-1;-1;-1;-1;-1				BIRC2
A0A0G2JNA7;A0A0G2JPA9;A0A0G2JPX5;A0A0G2JPU4;A0A0G2JMH7;A0A0A0MS20;A0A0G2JM84;A0A0G2JQ20;A0A0G2JQ10;A0A0G2JP25;A0A0G2JML1;A0A0G2JNE9;A0A0G2JP84;A0A0G2JM57;A0A0G2JPC7;A0A0A0MSZ8;A0A0G2JM38;C9JST2;A0A0G2JM43;A8MUE1;A0A0G2JNL1;Q8NHJ6	A0A0G2JNA7;A0A0G2JPA9;A0A0G2JPX5;A0A0G2JPU4;A0A0G2JMH7;A0A0A0MS20;A0A0G2JM84;A0A0G2JQ20;A0A0G2JQ10;A0A0G2JP25;A0A0G2JML1;A0A0G2JNE9;A0A0G2JP84;A0A0G2JM57;A0A0G2JPC7;A0A0A0MSZ8;A0A0G2JM38;C9JST2;A0A0G2JM43;A8MUE1;A0A0G2JNL1;Q8NHJ6	1;1;1;1;1;1;1;1;1;1;1;1;1;1;1;1;1;1;1;1;1;1	1;1;1;1;1;1;1;1;1;1;1;1;1;1;1;1;1;1;1;1;1;1	1;1;1;1;1;1;1;1;1;1;1;1;1;1;1;1;1;1;1;1;1;1	Leukocyte immunoglobulin-like receptor subfamily B member 4	LILRB4	tr|A0A0G2JNA7|A0A0G2JNA7_HUMAN Leukocyte immunoglobulin-like receptor subfamily B member 4 (Fragment) OS=Homo sapiens OX=9606 GN=LILRB4 PE=1 SV=1;tr|A0A0G2JPA9|A0A0G2JPA9_HUMAN Leukocyte immunoglobulin-like receptor subfamily B member 4 OS=Homo sapiens OX=	22	1	1	1	5.7	5.7	5.7	30.836	280	280;395;449;449;449;449;448;448;448;448;448;448;447;447;447;447;437;399;399;395;478;448	0.0055772	1.4189	0	0	0	0	0	0	0	0	0	0	0	1				296	44637	TRUE	48399	91210	122387	122387			-1;-1;-1;-1;-1;-1;-1;-1;-1;-1;-1;-1;-1;-1;-1;-1;-1;-1;-1;-1;-1;-1				LILRB4
A0A0A0MSA0;Q16787;K7EIP4;A0A0A0MTS5;A0A0A6YYF2	A0A0A0MSA0;Q16787;K7EIP4;A0A0A0MTS5;A0A0A6YYF2	2;2;1;1;1	1;1;1;1;1	1;1;1;1;1	Laminin subunit alpha-3	LAMA3	tr|A0A0A0MSA0|A0A0A0MSA0_HUMAN Laminin subunit alpha-3 OS=Homo sapiens OX=9606 GN=LAMA3 PE=1 SV=1;sp|Q16787|LAMA3_HUMAN Laminin subunit alpha-3 OS=Homo sapiens OX=9606 GN=LAMA3 PE=1 SV=2;tr|K7EIP4|K7EIP4_HUMAN Laminin subunit alpha-3 (Fragment) OS=Homo sap	5	2	1	1	0.8	0.3	0.3	360.18	3277	3277;3333;1147;1668;1724	0	7.4165	0	0	0	0	0	0	0	0	0	0	0	1				303	3851;18647	True;False	4107;19974	7925;36680	10795;49346	10795;49346			-1;-1;-1;-1;-1				LAMA3
A0A0B4J1R6	A0A0B4J1R6	32	1	1		TKT	tr|A0A0B4J1R6|A0A0B4J1R6_HUMAN Transketolase OS=Homo sapiens OX=9606 GN=TKT PE=1 SV=1	1	32	1	1	74.8	1.5	1.5	49.91	457	457	1	-2	0	0	0	0	0	0	0	0	0	0	0	1	+			359	1930;6039;6595;6857;7788;8222;8223;17372;23000;23001;26674;28447;28757;29108;30948;31325;31796;33502;34783;34923;35388;40211;40796;43617;43618;48570;51976;55173;58851;59456;62209;62210	True;False;False;False;False;False;False;False;False;False;False;False;False;False;False;False;False;False;False;False;False;False;False;False;False;False;False;False;False;False;False;False	2070;6502;7093;7373;8350;8804;8805;18625;24632;24633;28589;30464;30787;31156;33164;33567;34076;35897;37246;37395;37396;37882;43191;43192;44045;44046;47316;47317;52604;56201;59615;63570;64225;67208;67209	4136;12396;12397;12398;12399;12400;12401;12402;12403;13478;13479;13480;13481;13482;13483;13484;13981;13982;13983;15477;15478;15479;15480;15481;16279;16280;16281;16282;16283;34091;45295;45296;45297;45298;45299;53521;53522;53523;53524;57485;57486;57487;58098;58099;58100;58728;58729;58730;62467;62468;63345;64493;67837;70440;70441;70737;70738;70739;70740;70741;70742;70743;70744;70745;70746;70747;7074…	5789;16703;16704;16705;16706;16707;16708;16709;16710;16711;16712;16713;16714;16715;16716;16717;16718;16719;16720;18164;18165;18166;18167;18168;18169;18170;18171;18172;18173;18174;18819;18820;18821;20692;20693;20694;20695;20696;20697;21769;21770;21771;21772;21773;45752;60965;60966;60967;60968;60969;71931;71932;71933;71934;71935;71936;77495;77496;77497;77498;77499;77500;77501;77502;77503;77504;7830…	5789;16714;18170;18820;20697;21770;21773;45752;60965;60967;71932;77498;78305;79125;84119;85212;86674;90943;94735;95143;96370;109543;111935;119978;119987;132745;141642;149143;159959;161697;169697;169701	279;280;281	33;137;438	-1				TKT
E9PKX1;E9PKY2;A0A0C4DFM7;Q5TAX3	E9PKX1;E9PKY2;A0A0C4DFM7;Q5TAX3	1;1;1;1	1;1;1;1	1;1;1;1	Terminal uridylyltransferase 4	ZCCHC11	tr|E9PKX1|E9PKX1_HUMAN Terminal uridylyltransferase 4 (Fragment) OS=Homo sapiens OX=9606 GN=TUT4 PE=1 SV=1;tr|E9PKY2|E9PKY2_HUMAN Terminal uridylyltransferase 4 (Fragment) OS=Homo sapiens OX=9606 GN=TUT4 PE=1 SV=1;tr|A0A0C4DFM7|A0A0C4DFM7_HUMAN Terminal ur	4	1	1	1	1.1	1.1	1.1	103.18	906	906;1203;1645;1644	0.005578	1.4196	0	0	0	0	0	0	0	0	0	0	0	1				378	14447	TRUE	15466	28445	38085	38085			-1;-1;-1;-1				ZCCHC11
A0A0C4DH07;Q8N2S1	A0A0C4DH07;Q8N2S1	1;1	1;1	1;1	Latent-transforming growth factor beta-binding protein 4	LTBP4	tr|A0A0C4DH07|A0A0C4DH07_HUMAN Latent-transforming growth factor beta-binding protein 4 OS=Homo sapiens OX=9606 GN=LTBP4 PE=1 SV=1;sp|Q8N2S1|LTBP4_HUMAN Latent-transforming growth factor beta-binding protein 4 OS=Homo sapiens OX=9606 GN=LTBP4 PE=1 SV=2	2	1	1	1	0.9	0.9	0.9	169.46	1587	1587;1624	0	5.8603	0	0	0	0	0	0	0	0	0	0	0	1				424	63816	TRUE	68974	129817	173919	173919			-1;-1				LTBP4
A0A1B0GVI7;P35869	A0A1B0GVI7;P35869	1;1	1;1	1;1	Aryl hydrocarbon receptor	AHR	tr|A0A1B0GVI7|A0A1B0GVI7_HUMAN Aryl hydrocarbon receptor (Fragment) OS=Homo sapiens OX=9606 PE=4 SV=1;sp|P35869|AHR_HUMAN Aryl hydrocarbon receptor OS=Homo sapiens OX=9606 GN=AHR PE=1 SV=2	2	1	1	1	1.4	1.4	1.4	90.58	797	797;848	0.0013327	2.2767	0	0	0	0	0	0	0	0	0	0	0	1				583	59399	TRUE	64161	120624	161575	161575			-1;-1				AHR
A0A1W2PRB8;A0A1W2PS69;E9PM72;A0A1W2PRX4;A0A1W2PNW7;A0A1W2PS27;Q9NVC6	A0A1W2PRB8	5;1;1;1;1;1;1	1;1;1;1;1;1;1	1;1;1;1;1;1;1			tr|A0A1W2PRB8|A0A1W2PRB8_HUMAN Cofactor required for Sp1 transcriptional activation subunit 6 OS=Homo sapiens OX=9606 PE=3 SV=1	7	5	1	1	8.6	1.8	1.8	93.444	838	838;500;509;530;605;652;651	0	6.005	0	0	0	0	0	0	0	0	0	0	0	1				628	27053;41786;52213;56836;65316	False;True;False;False;False	28990;28991;45349;56462;61386;70573;70574	54534;54535;54536;54537;54538;85894;106319;115164;132834;132835;132836;132837;132838	73282;73283;73284;73285;73286;73287;73288;115419;142270;142271;154110;154111;177948;177949;177950;177951;177952	73285;115419;142271;154110;177951	41;42;43	170;186;210	-1;-1;-1;-1;-1;-1;-1
A0A1X7SBR1;Q7Z3G6	A0A1X7SBR1;Q7Z3G6	1;1	1;1	1;1	Prickle-like protein 2	PRICKLE2	tr|A0A1X7SBR1|A0A1X7SBR1_HUMAN Prickle-like protein 2 OS=Homo sapiens OX=9606 GN=PRICKLE2 PE=1 SV=1;sp|Q7Z3G6|PRIC2_HUMAN Prickle-like protein 2 OS=Homo sapiens OX=9606 GN=PRICKLE2 PE=1 SV=2	2	1	1	1	1.1	1.1	1.1	102	900	900;844	0	4.8832	0	0	0	0	0	0	0	0	0	0	0	1				632	65760	TRUE	71045	133603	178945	178945			-1;-1				PRICKLE2
U3KQE4;A0A2R8YCL0;A0A2R8YD19;A0A2R8Y511;A0A2R8YFH3;A0A2R8Y3S0;Q96JX3	U3KQE4;A0A2R8YCL0;A0A2R8YD19;A0A2R8Y511;A0A2R8YFH3;A0A2R8Y3S0;Q96JX3	1;1;1;1;1;1;1	1;1;1;1;1;1;1	1;1;1;1;1;1;1	Protein SERAC1	SERAC1	tr|U3KQE4|U3KQE4_HUMAN Protein SERAC1 OS=Homo sapiens OX=9606 GN=SERAC1 PE=1 SV=1;tr|A0A2R8YCL0|A0A2R8YCL0_HUMAN Protein SERAC1 OS=Homo sapiens OX=9606 GN=SERAC1 PE=1 SV=1;tr|A0A2R8YD19|A0A2R8YD19_HUMAN Protein SERAC1 OS=Homo sapiens OX=9606 GN=SERAC1 PE=1	7	1	1	1	2.4	2.4	2.4	46.698	409	409;566;587;611;622;624;654	0.0027236	1.7535	0	0	0	0	0	0	0	0	0	0	0	1				656	13082	TRUE	14029	25781	34495	34495			-1;-1;-1;-1;-1;-1;-1				SERAC1
A0A2R8Y4M1;A0A5F9ZHK1;A0A2R8YGW2;A0A2R8Y615;Q9NZA1	A0A2R8Y4M1;A0A5F9ZHK1;A0A2R8YGW2;A0A2R8Y615;Q9NZA1	1;1;1;1;1	1;1;1;1;1	1;1;1;1;1	Chloride intracellular channel protein 5	CLIC5	tr|A0A2R8Y4M1|A0A2R8Y4M1_HUMAN Chloride intracellular channel protein 5 OS=Homo sapiens OX=9606 GN=CLIC5 PE=1 SV=1;tr|A0A5F9ZHK1|A0A5F9ZHK1_HUMAN Chloride intracellular channel protein 5 OS=Homo sapiens OX=9606 GN=CLIC5 PE=1 SV=1;tr|A0A2R8YGW2|A0A2R8YGW2_H	5	1	1	1	6	6	6	22.284	200	200;219;222;242;410	0.00060781	2.6163	0	0	0	0	0	0	0	0	0	0	0	1				667	17236	TRUE	18476	33831	45386	45386			-1;-1;-1;-1;-1				CLIC5
O75140;A0A2R8Y7U0;H0Y770;A0A2R8Y6H3;A0A2R8Y721;A0A2R8Y5K9;A0A5F9UWT1;A0A2R8YEW8;A0A2R8Y5P2;A0A2R8YF50;A0A2R8Y5T1;A0A2R8Y6V4;A0A2R8Y7U6;A0A2R8Y5E9;A0A2R8YF97;A0A2R8Y6H8;A0A2R8Y842	O75140;A0A2R8Y7U0;H0Y770;A0A2R8Y6H3;A0A2R8Y721;A0A2R8Y5K9;A0A5F9UWT1;A0A2R8YEW8;A0A2R8Y5P2;A0A2R8YF50;A0A2R8Y5T1;A0A2R8Y6V4;A0A2R8Y7U6;A0A2R8Y5E9;A0A2R8YF97;A0A2R8Y6H8;A0A2R8Y842	2;2;2;2;2;2;2;1;1;1;1;1;1;1;1;1;1	2;2;2;2;2;2;2;1;1;1;1;1;1;1;1;1;1	2;2;2;2;2;2;2;1;1;1;1;1;1;1;1;1;1	DEP domain-containing protein 5	DEPDC5	sp|O75140|DEPD5_HUMAN GATOR complex protein DEPDC5 OS=Homo sapiens OX=9606 GN=DEPDC5 PE=1 SV=2;tr|A0A2R8Y7U0|A0A2R8Y7U0_HUMAN GATOR complex protein DEPDC5 OS=Homo sapiens OX=9606 GN=DEPDC5 PE=1 SV=1;tr|H0Y770|H0Y770_HUMAN GATOR complex protein DEPDC5 OS=Ho	17	2	2	2	1.6	1.6	1.6	181.26	1603	1603;1589;1575;1525;1496;1484;1343;1285;531;600;1198;1187;829;795;748;638;1207	0	6.9802	0	0	0	0	0	0	0	0	0	0	0	2				683	53772;53946	True;True	58134;58317	109152;109448	145948;146312	145948;146312			-1;-1;-1;-1;-1;-1;-1;-1;-1;-1;-1;-1;-1;-1;-1;-1;-1				DEPDC5
A0A2R8YEL6;B4E2I4;A0A2R8Y648	A0A2R8YEL6;B4E2I4;A0A2R8Y648	21;20;12	1;0;0	1;0;0			tr|A0A2R8YEL6|A0A2R8YEL6_HUMAN Gamma-ECS (Fragment) OS=Homo sapiens OX=9606 GN=GCLC PE=1 SV=1;tr|B4E2I4|B4E2I4_HUMAN Gamma-ECS OS=Homo sapiens OX=9606 GN=GCLC PE=1 SV=1;tr|A0A2R8Y648|A0A2R8Y648_HUMAN Gamma-ECS OS=Homo sapiens OX=9606 GN=GCLC PE=1 SV=1	3	21	1	1	31.3	1.9	1.9	72.931	639	639;584;361	0	11.89	0	0	0	0	0	0	0	0	0	0	0	1				716	5216;7425;7954;9587;10505;13786;19550;22514;25662;34627;39178;43745;48593;52787;53908;54202;62301;62302;64606;65243;65879	False;False;False;False;False;False;False;False;False;False;False;False;False;False;True;False;False;False;False;False;False	5619;7964;8524;10264;11291;14759;20944;24118;27482;37081;41911;47457;52630;57069;58277;58591;67306;67307;69823;70493;71180	10817;10818;14845;15788;18946;20849;27058;27059;27060;27061;38486;38487;44358;44359;44360;50691;70118;78895;89621;89622;99008;99009;107364;107365;107366;107367;107368;109375;109907;109908;126782;126783;131516;132696;132697;132698;133870;133871	14644;14645;19879;21104;25293;27865;36192;36193;36194;36195;36196;51774;51775;51776;59754;59755;59756;68236;94291;106107;106108;120307;120308;120309;120310;132800;132801;143657;143658;143659;143660;143661;143662;143663;146226;146902;146903;146904;169896;169897;169898;176238;177766;177767;177768;179336;179337	14644;19879;21104;25293;27865;36196;51776;59756;68236;94291;106108;120308;132801;143659;146226;146902;169896;169897;176238;177767;179337	594	485	-1;-1;-1
A0A3B3IRZ9	A0A3B3IRZ9	4	1	1			tr|A0A3B3IRZ9|A0A3B3IRZ9_HUMAN Inositol 1,4,5-trisphosphate receptor type 1 (Fragment) OS=Homo sapiens OX=9606 GN=ITPR1 PE=1 SV=1	1	4	1	1	12.8	3.7	3.7	34.018	298	298	1	-2	0	0	0	0	0	0	0	0	0	0	0	1	+			750	5458;7258;44038;57204	False;False;False;True	5877;7792;47773;61795	11237;14582;90206;115965	15167;19552;121096;155154	15167;19552;121096;155154	610	245	-1
Q5TCK5;A0A494C0R3;A0A494C1I0;Q6TCH4	Q5TCK5;A0A494C0R3;A0A494C1I0;Q6TCH4	1;1;1;1	1;1;1;1	1;1;1;1	Progestin and adipoQ receptor family member 6	PAQR6	tr|Q5TCK5|Q5TCK5_HUMAN Membrane progestin receptor delta OS=Homo sapiens OX=9606 GN=PAQR6 PE=3 SV=2;tr|A0A494C0R3|A0A494C0R3_HUMAN Membrane progestin receptor delta (Fragment) OS=Homo sapiens OX=9606 GN=PAQR6 PE=3 SV=1;tr|A0A494C1I0|A0A494C1I0_HUMAN Membra	4	1	1	1	6.8	6.8	6.8	19.625	176	176;212;307;344	0.0041135	1.6075	0	0	0	0	0	0	0	0	0	0	0	1				829	37080	TRUE	39694	74800	100497	100497			-1;-1;-1;-1				PAQR6
A0A669KBJ4;Q6P0Q8	A0A669KBJ4;Q6P0Q8	2;2	1;1	1;1	Microtubule-associated serine/threonine-protein kinase 2	MAST2	tr|A0A669KBJ4|A0A669KBJ4_HUMAN Non-specific serine/threonine protein kinase OS=Homo sapiens OX=9606 GN=MAST2 PE=1 SV=1;sp|Q6P0Q8|MAST2_HUMAN Microtubule-associated serine/threonine-protein kinase 2 OS=Homo sapiens OX=9606 GN=MAST2 PE=1 SV=2	2	2	1	1	1.3	0.8	0.8	180.99	1655	1655;1798	0	15.519	0	0	0	0	0	0	0	0	0	0	0	1				924	38510;59993	False;True	41203;64813	77698;77699;121881	104554;104555;104556;163229	104555;163229			-1;-1				MAST2
A6NC98	A6NC98	1	1	1	Coiled-coil domain-containing protein 88B	CCDC88B	sp|A6NC98|CC88B_HUMAN Coiled-coil domain-containing protein 88B OS=Homo sapiens OX=9606 GN=CCDC88B PE=1 SV=1	1	1	1	1	0.9	0.9	0.9	164.81	1476	1476	0	8.3375	0	0	0	0	0	0	0	0	0	0	0	1				971	1316	TRUE	1408	2680	3685	3685			-1				CCDC88B
A6NE02	A6NE02	1	1	1	BTB/POZ domain-containing protein 17	BTBD17	sp|A6NE02|BTBDH_HUMAN BTB/POZ domain-containing protein 17 OS=Homo sapiens OX=9606 GN=BTBD17 PE=3 SV=1	1	1	1	1	4	4	4	52.47	478	478	0	13.994	0	0	0	0	0	0	0	0	0	0	0	1				978	39406	TRUE	42158	79449	106929	106929			-1				BTBD17
A8MXV4	A8MXV4	1	1	1	Nucleoside diphosphate-linked moiety X motif 19, mitochondrial	NUDT19	sp|A8MXV4|NUD19_HUMAN Nucleoside diphosphate-linked moiety X motif 19 OS=Homo sapiens OX=9606 GN=NUDT19 PE=1 SV=1	1	1	1	1	2.7	2.7	2.7	42.233	375	375	0.0051741	1.4481	0	0	0	0	0	0	0	0	0	0	0	1				1040	19238	TRUE	20606	37914	51030	51030			-1				NUDT19
H0YNF6;B3KT51;E7EPS7;H0YNS4;Q9BRN9	H0YNF6;B3KT51;E7EPS7;H0YNS4;Q9BRN9	1;1;1;1;1	1;1;1;1;1	1;1;1;1;1	TM2 domain-containing protein 3	TM2D3	tr|H0YNF6|H0YNF6_HUMAN TM2 domain-containing protein 3 (Fragment) OS=Homo sapiens OX=9606 GN=TM2D3 PE=1 SV=1;tr|B3KT51|B3KT51_HUMAN TM2 domain containing 3, isoform CRA_a OS=Homo sapiens OX=9606 GN=TM2D3 PE=1 SV=1;tr|E7EPS7|E7EPS7_HUMAN TM2 domain-containi	5	1	1	1	5.6	5.6	5.6	18.074	161	161;182;183;209;247	0.0023045	1.8235	0	0	0	0	0	0	0	0	0	0	0	1				1088	9206	TRUE	9855	18169	24255	24255			-1;-1;-1;-1;-1				TM2D3
B6ZDF2;H7BYB7;Q8N697	B6ZDF2;H7BYB7;Q8N697	1;1;1	1;1;1	1;1;1	Solute carrier family 15 member 4	SLC15A4	tr|B6ZDF2|B6ZDF2_HUMAN Solute carrier family 15 member 4 (Fragment) OS=Homo sapiens OX=9606 GN=SLC15A4 PE=1 SV=4;tr|H7BYB7|H7BYB7_HUMAN Solute carrier family 15 member 4 (Fragment) OS=Homo sapiens OX=9606 GN=SLC15A4 PE=1 SV=1;sp|Q8N697|S15A4_HUMAN Solute c	3	1	1	1	7.7	7.7	7.7	16.597	155	155;238;577	0	7.8336	0	0	0	0	0	0	0	0	0	0	0	1				1159	4205	TRUE	4554	8816	11976	11976			-1;-1;-1				SLC15A4
B7Z9U0;Q9UFF9	B7Z9U0;Q9UFF9	1;1	1;1	1;1	CCR4-NOT transcription complex subunit 8	CNOT8	tr|B7Z9U0|B7Z9U0_HUMAN Poly(A)-specific ribonuclease OS=Homo sapiens OX=9606 GN=CNOT8 PE=1 SV=1;sp|Q9UFF9|CNOT8_HUMAN CCR4-NOT transcription complex subunit 8 OS=Homo sapiens OX=9606 GN=CNOT8 PE=1 SV=1	2	1	1	1	8.6	8.6	8.6	14.656	128	128;292	0.0014771	2.2471	0	0	0	0	0	0	0	0	0	0	0	2				1181	46920	TRUE	50860	95891;95892	128743;128744	128743			-1;-1				CNOT8
C9JEL3;B9A044;B8ZZ50;O60573	C9JEL3;B9A044;B8ZZ50;O60573	1;1;1;1	1;1;1;1	1;1;1;1	Eukaryotic translation initiation factor 4E type 2	EIF4E2	tr|C9JEL3|C9JEL3_HUMAN Eukaryotic translation initiation factor 4E type 2 (Fragment) OS=Homo sapiens OX=9606 GN=EIF4E2 PE=1 SV=1;tr|B9A044|B9A044_HUMAN Eukaryotic translation initiation factor 4E type 2 OS=Homo sapiens OX=9606 GN=EIF4E2 PE=1 SV=1;tr|B8ZZ50	4	1	1	1	7.5	7.5	7.5	24.602	213	213;233;236;245	0	4.5289	0	0	0	0	0	0	0	0	0	0	0	1				1193	58168	TRUE	62848	117825	157596	157596			-1;-1;-1;-1				EIF4E2
C9J384;Q9BQ75	C9J384;Q9BQ75	1;1	1;1	1;1	Protein CMSS1	CMSS1	tr|C9J384|C9J384_HUMAN Protein CMSS1 (Fragment) OS=Homo sapiens OX=9606 GN=CMSS1 PE=1 SV=1;sp|Q9BQ75|CMS1_HUMAN Protein CMSS1 OS=Homo sapiens OX=9606 GN=CMSS1 PE=1 SV=2	2	1	1	1	3.6	3.6	3.6	26.228	225	225;279	1	-2	0	0	0	0	0	0	0	0	0	0	0	2	+			1229	40622	TRUE	43791	82632;82633	111144;111145	111145	908;909	203;204	-1;-1				CMSS1
C9JSL1;F8WF63;F8WCA5;E9PGM9;P78332	C9JSL1;F8WF63;F8WCA5;E9PGM9;P78332	1;1;1;1;1	1;1;1;1;1	1;1;1;1;1	RNA-binding protein 6	RBM6	tr|C9JSL1|C9JSL1_HUMAN RNA-binding protein 6 (Fragment) OS=Homo sapiens OX=9606 GN=RBM6 PE=1 SV=1;tr|F8WF63|F8WF63_HUMAN RNA-binding protein 6 OS=Homo sapiens OX=9606 GN=RBM6 PE=1 SV=1;tr|F8WCA5|F8WCA5_HUMAN RNA-binding protein 6 OS=Homo sapiens OX=9606 GN	5	1	1	1	7.1	7.1	7.1	18.296	156	156;199;697;991;1123	0.00015855	3.2723	0	0	0	0	0	0	0	0	0	0	0	1				1319	45380	TRUE	49201	92826	124716	124716			-1;-1;-1;-1;-1				RBM6
C9JSU7;Q9C0K7	C9JSU7;Q9C0K7	1;1	1;1	1;1	STE20-related kinase adapter protein beta	STRADB	tr|C9JSU7|C9JSU7_HUMAN STE20-related kinase adapter protein beta (Fragment) OS=Homo sapiens OX=9606 GN=STRADB PE=1 SV=2;sp|Q9C0K7|STRAB_HUMAN STE20-related kinase adapter protein beta OS=Homo sapiens OX=9606 GN=STRADB PE=1 SV=1	2	1	1	1	4.1	4.1	4.1	21.99	194	194;418	0.0090213	1.1584	0	0	0	0	0	0	0	0	0	0	0	1				1320	42297	TRUE	45883	86788	116575	116575			-1;-1				STRADB
D6RED1;D6R9N5;D6RB08;K4DIA5;P14316	D6RED1;D6R9N5;D6RB08;K4DIA5;P14316	1;1;1;1;1	1;1;1;1;1	1;1;1;1;1	Interferon regulatory factor 2	IRF2	tr|D6RED1|D6RED1_HUMAN Interferon regulatory factor 2 OS=Homo sapiens OX=9606 GN=IRF2 PE=1 SV=1;tr|D6R9N5|D6R9N5_HUMAN Interferon regulatory factor 2 (Fragment) OS=Homo sapiens OX=9606 GN=IRF2 PE=1 SV=1;tr|D6RB08|D6RB08_HUMAN Interferon regulatory factor 2	5	1	1	1	10.8	10.8	10.8	9.0853	83	83;137;160;176;349	1	-2	0	0	0	0	0	0	0	0	0	0	0	1	+			1378	40804	TRUE	44056	83212	111960	111960	986;987;988	1;6;8	-1;-1;-1;-1;-1				IRF2
D6RAI0;D6RGK7;D6RAZ3;D6R9T3;E7EMP6;Q96FZ2	D6RAI0;D6RGK7;D6RAZ3;D6R9T3;E7EMP6;Q96FZ2	1;1;1;1;1;1	1;1;1;1;1;1	1;1;1;1;1;1	Embryonic stem cell-specific 5-hydroxymethylcytosine-binding protein	HMCES	tr|D6RAI0|D6RAI0_HUMAN Abasic site processing protein HMCES (Fragment) OS=Homo sapiens OX=9606 GN=HMCES PE=1 SV=1;tr|D6RGK7|D6RGK7_HUMAN Abasic site processing protein HMCES (Fragment) OS=Homo sapiens OX=9606 GN=HMCES PE=1 SV=1;tr|D6RAZ3|D6RAZ3_HUMAN Abasi	6	1	1	1	9.3	9.3	9.3	15.976	140	140;183;233;282;312;354	0.0013333	2.2831	0	0	0	0	0	0	0	0	0	0	0	1				1380	40729	TRUE	43949	82904	111459	111459			-1;-1;-1;-1;-1;-1				HMCES
D6R9Z1	D6R9Z1	12	1	0		GNB2L1	tr|D6R9Z1|D6R9Z1_HUMAN Receptor of-activated protein C kinase 1 (Fragment) OS=Homo sapiens OX=9606 GN=RACK1 PE=1 SV=8	1	12	1	0	60.2	6.4	0	26.349	236	236	1	-2	0	0	0	0	0	0	0	0	0	0	0	0	+			1382	8522;8970;11654;20387;38798;39446;39447;39473;44435;57984;64871;67451	False;False;False;False;False;False;False;False;True;False;False;False	9124;9604;9605;12502;21839;41512;42198;42199;42225;62657;70104;72848	16806;17716;17717;17718;17719;17720;23024;23025;40148;78228;78229;78230;79517;79518;79519;79553;117485;117486;132046;132047;136942	22443;22444;23684;23685;23686;23687;23688;23689;23690;23691;30774;30775;30776;54059;105250;105251;105252;107035;107036;107037;107038;107039;107078;157142;157143;157144;176934;176935;176936;183431	22444;23691;30775;54059;105251;107036;107039;107078;157142;176936;183431	990	203	-1				GNB2L1
E5RGH8;E5RJJ5;Q495M3	E5RGH8;E5RJJ5;Q495M3	1;1;1	1;1;1	1;1;1	Proton-coupled amino acid transporter 2	SLC36A2	tr|E5RGH8|E5RGH8_HUMAN Proton-coupled amino acid transporter 2 OS=Homo sapiens OX=9606 GN=SLC36A2 PE=1 SV=1;tr|E5RJJ5|E5RJJ5_HUMAN Proton-coupled amino acid transporter 2 OS=Homo sapiens OX=9606 GN=SLC36A2 PE=1 SV=1;sp|Q495M3|S36A2_HUMAN Proton-coupled ami	3	1	1	1	8.2	8.2	8.2	15.913	147	147;395;483	0	11.776	0	0	0	0	0	0	0	0	0	0	0	1				1444	54731	TRUE	59144	110789	148049	148049			-1;-1;-1				SLC36A2
H0YJY4;H0YJM2;E9PCJ7;Q8N806	H0YJY4;H0YJM2;E9PCJ7;Q8N806	1;1;1;1	1;1;1;1	1;1;1;1	Putative E3 ubiquitin-protein ligase UBR7	UBR7	tr|H0YJY4|H0YJY4_HUMAN Putative E3 ubiquitin-protein ligase UBR7 (Fragment) OS=Homo sapiens OX=9606 GN=UBR7 PE=1 SV=1;tr|H0YJM2|H0YJM2_HUMAN Putative E3 ubiquitin-protein ligase UBR7 (Fragment) OS=Homo sapiens OX=9606 GN=UBR7 PE=1 SV=1;tr|E9PCJ7|E9PCJ7_HUM	4	1	1	1	7.3	7.3	7.3	14.322	124	124;174;360;425	0.0001625	3.6343	0	0	0	0	0	0	0	0	0	0	0	1				1577	18547	TRUE	19867	36413	48937	48937			-1;-1;-1;-1				UBR7
E9PHB5;D6RHE9	E9PHB5	28;2	1;0	1;0		CTNND2	tr|E9PHB5|E9PHB5_HUMAN Catenin delta-2 OS=Homo sapiens OX=9606 GN=CTNND2 PE=1 SV=1	2	28	1	1	32.9	1.5	1.5	99.403	912	912;231	0	22.339	0	0	0	0	0	0	0	0	0	0	0	1				1618	663;4094;5496;7727;25446;27554;29656;32189;32450;36994;41438;41490;42455;42861;43996;46217;46719;50439;50684;52016;53693;53694;53821;56122;58262;58958;59309;64444	False;False;False;False;True;False;False;False;False;False;False;False;False;False;False;False;False;False;False;False;False;False;False;False;False;False;False;False	703;704;4421;4422;5920;8283;27245;29517;31770;34496;34774;39603;44980;45039;46054;46491;47730;50086;50612;54583;54837;56248;58052;58053;58184;60627;62946;63684;64067;69645	1270;1271;1272;8594;8595;8596;11316;11317;15327;50252;55439;55440;59976;65219;65720;74664;85272;85374;85375;87087;87088;87898;90127;94475;95426;102995;103445;105905;105906;109017;109018;109019;109020;109021;109220;113832;118005;119627;119628;120454;131016;131017;131018	1732;1733;1734;1735;11708;11709;11710;15261;15262;15263;20480;20481;67690;74461;74462;80876;87564;88169;100325;114604;114729;114730;116962;116963;118010;120985;126866;128175;128176;137808;138391;141731;141732;141733;141734;145776;145777;145778;145779;145780;145781;146031;146032;152338;157837;160191;160192;160193;160194;161342;175546;175547;175548	1734;11710;15262;20480;67690;74461;80876;87564;88169;100325;114604;114729;116963;118010;120985;126866;128176;137808;138391;141731;145777;145779;146032;152338;157837;160192;161342;175547	1193;1194	734;795	-1;-1				CTNND2
E9PQT8	E9PQT8	1	1	1		PHF1	tr|E9PQT8|E9PQT8_HUMAN PHD finger protein 1 OS=Homo sapiens OX=9606 GN=PHF1 PE=1 SV=1	1	1	1	1	3.3	3.3	3.3	45.694	419	419	0.0046453	1.5122	0	0	0	0	0	0	0	0	0	0	0	1				1685	23562	TRUE	25219	46393	62419	62419			-1				PHF1
F6TX30;Q9NWX5	F6TX30;Q9NWX5	1;1	1;1	1;1	Ankyrin repeat and SOCS box protein 6	ASB6	tr|F6TX30|F6TX30_HUMAN Ankyrin repeat and SOCS box protein 6 OS=Homo sapiens OX=9606 GN=ASB6 PE=1 SV=1;sp|Q9NWX5|ASB6_HUMAN Ankyrin repeat and SOCS box protein 6 OS=Homo sapiens OX=9606 GN=ASB6 PE=1 SV=1	2	1	1	1	2.6	2.6	2.6	44.082	392	392;421	0.00016031	3.4291	0	0	0	0	0	0	0	0	0	0	0	1				1783	46421	TRUE	50299	94828	127321	127321			-1;-1				ASB6
G3V331;O15037	G3V331;O15037	1;1	1;1	1;1	Protein KHNYN	KHNYN	tr|G3V331|G3V331_HUMAN Protein KHNYN (Fragment) OS=Homo sapiens OX=9606 GN=KHNYN PE=1 SV=8;sp|O15037|KHNYN_HUMAN Protein KHNYN OS=Homo sapiens OX=9606 GN=KHNYN PE=1 SV=3	2	1	1	1	11.9	11.9	11.9	14.852	134	134;678	0.0025858	1.7843	0	0	0	0	0	0	0	0	0	0	0	1				1883	8043	TRUE	8616	15933	21299	21299			-1;-1				KHNYN
H0YE12;H0Y679;Q92733	H0YE12;H0Y679;Q92733	1;1;1	1;1;1	1;1;1	Proline-rich protein PRCC	PRCC	tr|H0YE12|H0YE12_HUMAN Proline-rich protein PRCC (Fragment) OS=Homo sapiens OX=9606 GN=PRCC PE=1 SV=1;tr|H0Y679|H0Y679_HUMAN Proline-rich protein PRCC (Fragment) OS=Homo sapiens OX=9606 GN=PRCC PE=1 SV=1;sp|Q92733|PRCC_HUMAN Proline-rich protein PRCC OS=Ho	3	1	1	1	5.6	5.6	5.6	22.543	198	198;257;491	0.0014789	2.2605	0	0	0	0	0	0	0	0	0	0	0	1				1957	24428	TRUE	26167	48130	64745	64745			-1;-1;-1				PRCC
H0YA96	H0YA96	13	1	1		HNRNPD	tr|H0YA96|H0YA96_HUMAN Heterogeneous nuclear ribonucleoprotein D0 (Fragment) OS=Homo sapiens OX=9606 GN=HNRNPD PE=1 SV=1	1	13	1	1	50.5	4.8	4.8	23.811	210	210	0	4.4848	0	0	0	0	0	0	0	0	0	0	0	1				1981	17103;18387;19197;22128;22129;22369;28091;28092;31791;33529;40216;40217;66356	False;False;False;False;False;True;False;False;False;False;False;False;False	18332;19701;20563;23701;23702;23963;30081;30082;34071;35925;43198;43199;71688	33600;33601;33602;36125;37848;37849;37850;37851;43620;43621;43622;44088;56431;56432;56433;56434;64434;67883;81420;81421;134748;134749	45074;45075;45076;48556;50944;50945;50946;50947;50948;58790;58791;58792;59400;75824;75825;75826;75827;75828;75829;86573;91001;109553;109554;180491;180492;180493;180494	45074;48556;50945;58790;58791;59400;75827;75829;86573;91001;109553;109554;180494	1001;1366	3;119	-1				HNRNPD
H0YKR4;H0YNR6;H0YN04;H0YKC9;Q9HA82;H0YMY6;H0YLY3	H0YKR4;H0YNR6;H0YN04;H0YKC9;Q9HA82;H0YMY6;H0YLY3	2;2;2;2;2;1;1	2;2;2;2;2;1;1	2;2;2;2;2;1;1	Ceramide synthase 4	CERS4	tr|H0YKR4|H0YKR4_HUMAN Ceramide synthase 4 (Fragment) OS=Homo sapiens OX=9606 GN=CERS4 PE=1 SV=1;tr|H0YNR6|H0YNR6_HUMAN Ceramide synthase 4 (Fragment) OS=Homo sapiens OX=9606 GN=CERS4 PE=1 SV=1;tr|H0YN04|H0YN04_HUMAN Ceramide synthase 4 OS=Homo sapiens OX=	7	2	2	2	14	14	14	16.237	136	136;192;306;343;394;92;113	0	5.3025	0	0	0	0	0	0	0	0	0	0	0	3				2030	43255;48123	True;True	46927;52131	88649;98102;98103	119011;131649;131650	119011;131649			-1;-1;-1;-1;-1;-1;-1				CERS4
H0YM19;H0YN78;H0YLI5;H0YMC0;Q9BV29	H0YM19;H0YN78;H0YLI5;H0YMC0;Q9BV29	1;1;1;1;1	1;1;1;1;1	1;1;1;1;1	Uncharacterized protein C15orf57	C15orf57	tr|H0YM19|H0YM19_HUMAN Coiled-coil domain-containing protein 32 OS=Homo sapiens OX=9606 GN=CCDC32 PE=1 SV=1;tr|H0YN78|H0YN78_HUMAN Coiled-coil domain-containing protein 32 (Fragment) OS=Homo sapiens OX=9606 GN=CCDC32 PE=1 SV=1;tr|H0YLI5|H0YLI5_HUMAN Coiled	5	1	1	1	6	6	6	16.551	149	149;170;173;203;185	0.00015446	2.9081	0	0	0	0	0	0	0	0	0	0	0	1				2039	23431	TRUE	25083	46121	62022	62022			-1;-1;-1;-1;-1				C15orf57
H0YM86;H0YN92;Q8TEB1	H0YM86;H0YN92;Q8TEB1	1;1;1	1;1;1	1;1;1	DDB1- and CUL4-associated factor 11	DCAF11	tr|H0YM86|H0YM86_HUMAN DDB1- and CUL4-associated factor 11 (Fragment) OS=Homo sapiens OX=9606 GN=DCAF11 PE=1 SV=1;tr|H0YN92|H0YN92_HUMAN DDB1- and CUL4-associated factor 11 (Fragment) OS=Homo sapiens OX=9606 GN=DCAF11 PE=1 SV=1;sp|Q8TEB1|DCA11_HUMAN DDB1-	3	1	1	1	6.7	6.7	6.7	16.573	149	149;182;546	0	6.5003	0	0	0	0	0	0	0	0	0	0	0	1				2042	24568	TRUE	26316	48375	65052	65052			-1;-1;-1				DCAF11
H3BQR9;Q6DHV7	H3BQR9;Q6DHV7	1;1	1;1	1;1	Adenosine deaminase-like protein	ADAL	tr|H3BQR9|H3BQR9_HUMAN Adenosine deaminase-like protein OS=Homo sapiens OX=9606 GN=ADAL PE=1 SV=1;sp|Q6DHV7|ADAL_HUMAN Adenosine deaminase-like protein OS=Homo sapiens OX=9606 GN=ADAL PE=1 SV=2	2	1	1	1	25.7	25.7	25.7	4.0979	35	35;355	0.0083837	1.2174	0	0	0	0	0	0	0	0	0	0	0	1				2087	35246	TRUE	37736	71402	96007	96007			-1;-1				ADAL
H7C4B9;H7BZY3;J3KN13;Q9P1T7	H7C4B9;H7BZY3;J3KN13;Q9P1T7	1;1;1;1	1;1;1;1	1;1;1;1	MyoD family inhibitor domain-containing protein	MDFIC	tr|H7C4B9|H7C4B9_HUMAN MyoD family inhibitor domain-containing protein (Fragment) OS=Homo sapiens OX=9606 GN=MDFIC PE=1 SV=1;tr|H7BZY3|H7BZY3_HUMAN MyoD family inhibitor domain-containing protein (Fragment) OS=Homo sapiens OX=9606 GN=MDFIC PE=1 SV=1;tr|J3K	4	1	1	1	10.3	10.3	10.3	16.46	156	156;156;355;246	0	53.15	0	0	0	0	0	0	0	0	0	0	0	1				2130	59849	TRUE	64657	121572	162810	162810			-1;-1;-1;-1				MDFIC
J3QRX6;H9KV77;Q9NQ92	J3QRX6;H9KV77;Q9NQ92	1;1;1	1;1;1	1;1;1	Coordinator of PRMT5 and differentiation stimulator	COPRS	tr|J3QRX6|J3QRX6_HUMAN Coordinator of PRMT5 and differentiation stimulator (Fragment) OS=Homo sapiens OX=9606 GN=COPRS PE=1 SV=1;tr|H9KV77|H9KV77_HUMAN Coordinator of PRMT5 and differentiation stimulator OS=Homo sapiens OX=9606 GN=COPRS PE=1 SV=1;sp|Q9NQ92	3	1	1	1	11.7	11.7	11.7	11.419	103	103;172;184	0	11.797	0	0	0	0	0	0	0	0	0	0	0	1				2163	25025	TRUE	26795	49281	66290	66290			-1;-1;-1				COPRS
J3KN66	J3KN66	14	1	1		TOR1AIP1	tr|J3KN66|J3KN66_HUMAN Torsin-1A-interacting protein 1 OS=Homo sapiens OX=9606 GN=TOR1AIP1 PE=1 SV=1	1	14	1	1	21.7	2.5	2.5	67.821	599	599	0	41.756	0	0	0	0	0	0	0	0	0	0	0	1				2197	7202;7704;10925;34273;48231;50107;51427;52459;53986;54064;54121;65746;65915;67083	False;False;False;False;False;False;False;True;False;False;False;False;False;False	7730;8258;11732;36717;52247;54226;55625;56720;58364;58444;58505;71031;71218;72458	14484;15283;15284;21622;69460;98305;102185;104933;104934;106750;109518;109633;109753;109754;109755;133583;133584;133929;136267;136268	19425;20417;20418;20419;20420;20421;20422;20423;20424;28876;93347;131921;136712;140482;140483;142861;146400;146547;146715;146716;146717;146718;178922;178923;179412;182577;182578	19425;20417;28876;93347;131921;136712;140483;142861;146400;146547;146716;178923;179412;182578			-1				TOR1AIP1
J3KPA1;P54108	J3KPA1;P54108	1;1	1;1	1;1	Cysteine-rich secretory protein 3	CRISP3	tr|J3KPA1|J3KPA1_HUMAN Cysteine-rich secretory protein 3 OS=Homo sapiens OX=9606 GN=CRISP3 PE=1 SV=1;sp|P54108|CRIS3_HUMAN Cysteine-rich secretory protein 3 OS=Homo sapiens OX=9606 GN=CRISP3 PE=1 SV=1	2	1	1	1	3.3	3.3	3.3	30.975	276	276;245	0.0021683	1.8661	0	0	0	0	0	0	0	0	0	0	0	1				2211	65930	TRUE	71233	133951	179445	179445			-1;-1				CRISP3
K7EM52;K7EKR5;K7EM88;K7EQ49;Q8TB05	K7EM52;K7EKR5;K7EM88;K7EQ49;Q8TB05	1;1;1;1;1	1;1;1;1;1	1;1;1;1;1	UBA-like domain-containing protein 1	UBALD1	tr|K7EM52|K7EM52_HUMAN UBA-like domain-containing protein 1 OS=Homo sapiens OX=9606 GN=UBALD1 PE=1 SV=1;tr|K7EKR5|K7EKR5_HUMAN UBA-like domain-containing protein 1 OS=Homo sapiens OX=9606 GN=UBALD1 PE=1 SV=1;tr|K7EM88|K7EM88_HUMAN UBA-like domain-containin	5	1	1	1	21.3	21.3	21.3	10.173	94	94;122;152;156;177	0	5.4697	0	0	0	0	0	0	0	0	0	0	0	1				2299	26692	TRUE	28607	53553	71966	71966			-1;-1;-1;-1;-1				UBALD1
K7EP86;J3QLG2;A0A494C061;A0A2R8Y4I2;J3KRG7	K7EP86;J3QLG2;A0A494C061	4;3;3;1;1	1;0;1;1;1	1;0;1;1;1		RHOT1	tr|K7EP86|K7EP86_HUMAN Mitochondrial Rho GTPase 1 (Fragment) OS=Homo sapiens OX=9606 GN=RHOT1 PE=1 SV=1;tr|J3QLG2|J3QLG2_HUMAN Mitochondrial Rho GTPase 1 (Fragment) OS=Homo sapiens OX=9606 GN=RHOT1 PE=1 SV=1;tr|A0A494C061|A0A494C061_HUMAN Mitochondrial Rho	5	4	1	1	29.5	5.1	5.1	17.927	156	156;134;214;48;57	0.0073326	1.3207	0	0	0	0	0	0	0	0	0	0	0	1				2316	28070;29412;40783;45563	True;False;False;False	30059;31515;44027;49396	56397;59527;83154;93169	75780;80223;111881;125161	75780;80223;111881;125161			-1;-1;-1;-1;-1				RHOT1
M0R0R8;M0R0X9;M0QXC8;M0QYT9;M0R205;M0QZB8;M0QZB7;Q14653	M0R0R8;M0R0X9;M0QXC8;M0QYT9;M0R205;M0QZB8;M0QZB7;Q14653	1;1;1;1;1;1;1;1	1;1;1;1;1;1;1;1	1;1;1;1;1;1;1;1	Interferon regulatory factor 3	IRF3	tr|M0R0R8|M0R0R8_HUMAN Interferon regulatory factor 3 (Fragment) OS=Homo sapiens OX=9606 GN=IRF3 PE=1 SV=1;tr|M0R0X9|M0R0X9_HUMAN Interferon regulatory factor 3 (Fragment) OS=Homo sapiens OX=9606 GN=IRF3 PE=1 SV=8;tr|M0QXC8|M0QXC8_HUMAN Interferon regulato	8	1	1	1	16.7	16.7	16.7	9.1604	84	84;105;119;281;287;329;408;427	0	22.718	0	0	0	0	0	0	0	0	0	0	0	1				2350	48076	TRUE	52081	98007	131511	131511			-1;-1;-1;-1;-1;-1;-1;-1				IRF3
O00287	O00287	1	1	1	Regulatory factor X-associated protein	RFXAP	sp|O00287|RFXAP_HUMAN Regulatory factor X-associated protein OS=Homo sapiens OX=9606 GN=RFXAP PE=1 SV=1	1	1	1	1	4.8	4.8	4.8	28.232	272	272	0	8.3375	0	0	0	0	0	0	0	0	0	0	0	1				2401	47397	TRUE	51369	96675	129722	129722			-1				RFXAP
O60308	O60308	1	1	1	Centrosomal protein of 104 kDa	CEP104	sp|O60308|CE104_HUMAN Centrosomal protein of 104 kDa OS=Homo sapiens OX=9606 GN=CEP104 PE=1 SV=1	1	1	1	1	1.4	1.4	1.4	104.45	925	925	0	8.4101	0	0	0	0	0	0	0	0	0	0	0	1				2655	54240	TRUE	58630	109974	146982	146982			-1				CEP104
O95405	O95405	1	1	1	Zinc finger FYVE domain-containing protein 9	ZFYVE9	sp|O95405|ZFYV9_HUMAN Zinc finger FYVE domain-containing protein 9 OS=Homo sapiens OX=9606 GN=ZFYVE9 PE=1 SV=2	1	1	1	1	0.6	0.6	0.6	156.4	1425	1425	0.0018882	1.962	0	0	0	0	0	0	0	0	0	0	0	1				2904	25431	TRUE	27228	50223	67649	67649			-1				ZFYVE9
P23497;H7C4B4;E9PHV6	P23497;H7C4B4;E9PHV6	2;1;1	1;1;1	1;1;1	Nuclear autoantigen Sp-100	SP100	sp|P23497|SP100_HUMAN Nuclear autoantigen Sp-100 OS=Homo sapiens OX=9606 GN=SP100 PE=1 SV=3;tr|H7C4B4|H7C4B4_HUMAN Nuclear autoantigen Sp-100 (Fragment) OS=Homo sapiens OX=9606 GN=SP100 PE=1 SV=1;tr|E9PHV6|E9PHV6_HUMAN Nuclear autoantigen Sp-100 OS=Homo sa	3	2	1	1	2.8	1.9	1.9	100.42	879	879;193;455	0	18.325	0	0	0	0	0	0	0	0	0	0	0	1				3556	19514;51509	False;True	20900;55712	38412;38413;38414;38415;105062	51688;51689;51690;51691;140646	51688;140646			-1;-1;-1				SP100
P26441	P26441	1	1	1	Ciliary neurotrophic factor	CNTF	sp|P26441|CNTF_HUMAN Ciliary neurotrophic factor OS=Homo sapiens OX=9606 GN=CNTF PE=1 SV=1	1	1	1	1	4.5	4.5	4.5	22.931	200	200	0.0011996	2.4213	0	0	0	0	0	0	0	0	0	0	0	1				3606	24616	TRUE	26365	48472	65178	65178			-1				CNTF
P34096	P34096	1	1	1	Ribonuclease 4	RNASE4	sp|P34096|RNAS4_HUMAN Ribonuclease 4 OS=Homo sapiens OX=9606 GN=RNASE4 PE=1 SV=3	1	1	1	1	6.1	6.1	6.1	16.84	147	147	0.0021717	1.9012	0	0	0	0	0	0	0	0	0	0	0	1				3725	40657	TRUE	43841	82720	111241	111241			-1				RNASE4
P53708	P53708	1	1	1	Integrin alpha-8;Integrin alpha-8 heavy chain;Integrin alpha-8 light chain	ITGA8	sp|P53708|ITA8_HUMAN Integrin alpha-8 OS=Homo sapiens OX=9606 GN=ITGA8 PE=1 SV=3	1	1	1	1	0.9	0.9	0.9	117.47	1063	1063	0	4.6602	0	0	0	0	0	0	0	0	0	0	0	1				4077	53420	TRUE	57766	108508	145115	145115			-1				ITGA8
Q14686	Q14686	1	1	1	Nuclear receptor coactivator 6	NCOA6	sp|Q14686|NCOA6_HUMAN Nuclear receptor coactivator 6 OS=Homo sapiens OX=9606 GN=NCOA6 PE=1 SV=3	1	1	1	1	0.6	0.6	0.6	219.14	2063	2063	0.00015535	2.9855	0	0	0	0	0	0	0	0	0	0	0	1				4717	22142	TRUE	23717	43646	58819	58819			-1				NCOA6
Q15024	Q15024	1	1	1	Exosome complex component RRP42	EXOSC7	sp|Q15024|EXOS7_HUMAN Exosome complex component RRP42 OS=Homo sapiens OX=9606 GN=EXOSC7 PE=1 SV=3	1	1	1	1	5.8	5.8	5.8	31.821	291	291	0.00016184	3.5765	0	0	0	0	0	0	0	0	0	0	0	1				4748	7551	TRUE	8096	15041	20118	20118			-1				EXOSC7
Q15050	Q15050	1	1	1	Ribosome biogenesis regulatory protein homolog	RRS1	sp|Q15050|RRS1_HUMAN Ribosome biogenesis regulatory protein homolog OS=Homo sapiens OX=9606 GN=RRS1 PE=1 SV=2	1	1	1	1	4.1	4.1	4.1	41.193	365	365	0.0045185	1.5519	0	0	0	0	0	0	0	0	0	0	0	1				4755	6709	TRUE	7213	13710	18483	18483			-1				RRS1
Q2M1Z3	Q2M1Z3	2	2	2	Rho GTPase-activating protein 31	ARHGAP31	sp|Q2M1Z3|RHG31_HUMAN Rho GTPase-activating protein 31 OS=Homo sapiens OX=9606 GN=ARHGAP31 PE=1 SV=2	1	2	2	2	1.7	1.7	1.7	156.98	1444	1444	0.00016396	3.7788	0	0	0	0	0	0	0	0	0	0	0	2				4900	6275;43453	True;True	6753;47143	12904;89082	17419;119604	17419;119604			-1				ARHGAP31
Q5H937;Q9Y2B9	Q5H937;Q9Y2B9	1;1	1;1	1;1	cAMP-dependent protein kinase inhibitor gamma	PKIG	tr|Q5H937|Q5H937_HUMAN cAMP-dependent protein kinase inhibitor gamma OS=Homo sapiens OX=9606 GN=PKIG PE=1 SV=1;sp|Q9Y2B9|IPKG_HUMAN cAMP-dependent protein kinase inhibitor gamma OS=Homo sapiens OX=9606 GN=PKIG PE=1 SV=1	2	1	1	1	25	25	25	6.9828	64	64;76	0	25.903	0	0	0	0	0	0	0	0	0	0	0	1				4980	41461	TRUE	45006	85322	114667	114667			-1;-1				PKIG
Q5SVS4	Q5SVS4	1	1	1	Kidney mitochondrial carrier protein 1	SLC25A30	sp|Q5SVS4|KMCP1_HUMAN Kidney mitochondrial carrier protein 1 OS=Homo sapiens OX=9606 GN=SLC25A30 PE=1 SV=1	1	1	1	1	3.8	3.8	3.8	32.474	291	291	0	5.7872	0	0	0	0	0	0	0	0	0	0	0	1				5029	37478	TRUE	40112	75708	101864	101864			-1				SLC25A30
Q5TD94	Q5TD94	1	1	1	Radial spoke head protein 4 homolog A	RSPH4A	sp|Q5TD94|RSH4A_HUMAN Radial spoke head protein 4 homolog A OS=Homo sapiens OX=9606 GN=RSPH4A PE=1 SV=1	1	1	1	1	1.4	1.4	1.4	80.732	716	716	0.00015523	2.9811	0	0	0	0	0	0	0	0	0	0	0	1				5082	16237	TRUE	17430	32055	42977	42977			-1				RSPH4A
U3KQN5;Q5VXM9;Q5VXN0;Q9H7B2	U3KQN5;Q5VXM9;Q5VXN0;Q9H7B2	1;1;1;1	1;1;1;1	1;1;1;1	Ribosome production factor 2 homolog	RPF2	tr|U3KQN5|U3KQN5_HUMAN Ribosome production factor 2 homolog OS=Homo sapiens OX=9606 GN=RPF2 PE=1 SV=1;tr|Q5VXM9|Q5VXM9_HUMAN Ribosome production factor 2 homolog OS=Homo sapiens OX=9606 GN=RPF2 PE=1 SV=2;tr|Q5VXN0|Q5VXN0_HUMAN Ribosome production factor 2	4	1	1	1	16.9	16.9	16.9	6.8821	59	59;76;214;306	0.0035618	1.6741	0	0	0	0	0	0	0	0	0	0	0	1				5123	22513	TRUE	24117	44357	59753	59753			-1;-1;-1;-1				RPF2
Q5VZU3;Q9Y2P8	Q5VZU3;Q9Y2P8	1;1	1;1	1;1	RNA 3-terminal phosphate cyclase-like protein	RCL1	tr|Q5VZU3|Q5VZU3_HUMAN RNA 3-terminal phosphate cyclase-like protein OS=Homo sapiens OX=9606 GN=RCL1 PE=1 SV=2;sp|Q9Y2P8|RCL1_HUMAN RNA 3-terminal phosphate cyclase-like protein OS=Homo sapiens OX=9606 GN=RCL1 PE=1 SV=3	2	1	1	1	5.6	5.6	5.6	23.252	215	215;373	0.005311	1.4378	0	0	0	0	0	0	0	0	0	0	0	1				5132	62443	TRUE	67456	127074	170279	170279			-1;-1				RCL1
Q7L8C5;H0YD47	Q7L8C5;H0YD47	2;1	2;1	2;1	Synaptotagmin-13	SYT13	sp|Q7L8C5|SYT13_HUMAN Synaptotagmin-13 OS=Homo sapiens OX=9606 GN=SYT13 PE=1 SV=1;tr|H0YD47|H0YD47_HUMAN Synaptotagmin-13 (Fragment) OS=Homo sapiens OX=9606 GN=SYT13 PE=1 SV=1	2	2	2	2	6.1	6.1	6.1	46.884	426	426;186	0	7.5494	0	0	0	0	0	0	0	0	0	0	0	2				5362	3136;56903	True;True	3356;61458	6602;115274	9016;154260	9016;154260			-1;-1				SYT13
Q7Z3V4	Q7Z3V4	1	1	1	Ubiquitin-protein ligase E3B	UBE3B	sp|Q7Z3V4|UBE3B_HUMAN Ubiquitin-protein ligase E3B OS=Homo sapiens OX=9606 GN=UBE3B PE=1 SV=3	1	1	1	1	0.8	0.8	0.8	123.1	1068	1068	0.00016714	4.1545	0	0	0	0	0	0	0	0	0	0	0	1				5386	57222	TRUE	61814	116000	155198	155198			-1				UBE3B
Q7Z6J4	Q7Z6J4	1	1	1	FYVE, RhoGEF and PH domain-containing protein 2	FGD2	sp|Q7Z6J4|FGD2_HUMAN FYVE, RhoGEF and PH domain-containing protein 2 OS=Homo sapiens OX=9606 GN=FGD2 PE=1 SV=1	1	1	1	1	2.7	2.7	2.7	74.891	655	655	0.0017477	2.0183	0	0	0	0	0	0	0	0	0	0	0	1				5414	50856	TRUE	55023	103870	139052	139052			-1				FGD2
Q86UW6;D6R9J2	Q86UW6;D6R9J2	2;1	1;1	1;1	NEDD4-binding protein 2	N4BP2	sp|Q86UW6|N4BP2_HUMAN NEDD4-binding protein 2 OS=Homo sapiens OX=9606 GN=N4BP2 PE=1 SV=2;tr|D6R9J2|D6R9J2_HUMAN NEDD4-binding protein 2 (Fragment) OS=Homo sapiens OX=9606 GN=N4BP2 PE=1 SV=1	2	2	1	1	1	0.6	0.6	198.8	1770	1770;173	0.0013321	2.2702	0	0	0	0	0	0	0	0	0	0	0	1				5451	23446;49725	False;True	25099;53827	46154;46155;46156;101445	62060;62061;62062;62063;62064;62065;62066;62067;62068;62069;135814	62063;135814			-1;-1				N4BP2
Q8N4P2;Q86WT1	Q8N4P2;Q86WT1	2;2	2;2	2;2	Tetratricopeptide repeat protein 30B;Tetratricopeptide repeat protein 30A	TTC30B;TTC30A	sp|Q8N4P2|TT30B_HUMAN Tetratricopeptide repeat protein 30B OS=Homo sapiens OX=9606 GN=TTC30B PE=1 SV=2;sp|Q86WT1|TT30A_HUMAN Tetratricopeptide repeat protein 30A OS=Homo sapiens OX=9606 GN=TTC30A PE=2 SV=3	2	2	2	2	2.7	2.7	2.7	76.098	665	665;665	0.0027244	1.7559	0	0	0	0	0	0	0	0	0	0	0	2				5479	26134;34980	True;True	27992;37453	52045;70828	69953;95262	69953;95262			-1;-1				TTC30B;TTC30A
Q8N201	Q8N201	1	1	1	Integrator complex subunit 1	INTS1	sp|Q8N201|INT1_HUMAN Integrator complex subunit 1 OS=Homo sapiens OX=9606 GN=INTS1 PE=1 SV=2	1	1	1	1	0.6	0.6	0.6	244.29	2190	2190	0	25.748	0	0	0	0	0	0	0	0	0	0	0	1				5611	116	TRUE	119	184	230	230			-1				INTS1
Q8N3R3	Q8N3R3	1	1	1	T-cell activation inhibitor, mitochondrial	TCAIM	sp|Q8N3R3|TCAIM_HUMAN T-cell activation inhibitor, mitochondrial OS=Homo sapiens OX=9606 GN=TCAIM PE=2 SV=2	1	1	1	1	2.4	2.4	2.4	57.924	496	496	0	7.35	0	0	0	0	0	0	0	0	0	0	0	1				5628	61794	TRUE	66752	125676	168402	168402			-1				TCAIM
Q8N3X1	Q8N3X1	1	1	1	Formin-binding protein 4	FNBP4	sp|Q8N3X1|FNBP4_HUMAN Formin-binding protein 4 OS=Homo sapiens OX=9606 GN=FNBP4 PE=1 SV=3	1	1	1	1	0.9	0.9	0.9	110.26	1017	1017	0.00016236	3.6231	0	0	0	0	0	0	0	0	0	0	0	1				5632	48324	TRUE	52343	98463	132127	132127			-1				FNBP4
Q8N461	Q8N461	1	1	1	F-box/LRR-repeat protein 16	FBXL16	sp|Q8N461|FXL16_HUMAN F-box/LRR-repeat protein 16 OS=Homo sapiens OX=9606 GN=FBXL16 PE=2 SV=2	1	1	1	1	2.3	2.3	2.3	51.657	479	479	0	11.356	0	0	0	0	0	0	0	0	0	0	0	2				5635	13920	TRUE	14902	27339;27340	36614;36615	36614			-1				FBXL16
Q8NAV1	Q8NAV1	1	1	1	Pre-mRNA-splicing factor 38A	PRPF38A	sp|Q8NAV1|PR38A_HUMAN Pre-mRNA-splicing factor 38A OS=Homo sapiens OX=9606 GN=PRPF38A PE=1 SV=1	1	1	1	1	3.8	3.8	3.8	37.476	312	312	0.0016184	2.1883	0	0	0	0	0	0	0	0	0	0	0	1				5696	67532	TRUE	72931	137076	183604	183604			-1				PRPF38A
Q8WTR4	Q8WTR4	1	1	1	Glycerophosphodiester phosphodiesterase domain-containing protein 5	GDPD5	sp|Q8WTR4|GDPD5_HUMAN Glycerophosphodiester phosphodiesterase domain-containing protein 5 OS=Homo sapiens OX=9606 GN=GDPD5 PE=1 SV=2	1	1	1	1	2	2	2	68.585	605	605	0	7.838	0	0	0	0	0	0	0	0	0	0	0	1				5845	60069	TRUE	64903	122090	163562	163562			-1				GDPD5
S5FZ81;Q8WUB8	S5FZ81;Q8WUB8	1;1	1;1	1;1	PHD finger protein 10	PHF10	tr|S5FZ81|S5FZ81_HUMAN PHD finger protein 10 OS=Homo sapiens OX=9606 GN=PHF10 PE=1 SV=1;sp|Q8WUB8|PHF10_HUMAN PHD finger protein 10 OS=Homo sapiens OX=9606 GN=PHF10 PE=1 SV=3	2	1	1	1	4.2	4.2	4.2	42.612	377	377;498	0.0029927	1.6786	0	0	0	0	0	0	0	0	0	0	0	1				5855	6577	TRUE	7073	13432	18102	18102			-1;-1				PHF10
Q8WVM7;Q68DW7	Q8WVM7;Q68DW7	3;2	1;1	1;1	Cohesin subunit SA-1	STAG1;DKFZp781D1416	sp|Q8WVM7|STAG1_HUMAN Cohesin subunit SA-1 OS=Homo sapiens OX=9606 GN=STAG1 PE=1 SV=3;tr|Q68DW7|Q68DW7_HUMAN Cohesin subunit SA-1 OS=Homo sapiens OX=9606 GN=STAG1 PE=1 SV=1	2	3	1	1	2.2	0.8	0.8	144.43	1258	1258;998	0.00015401	2.8529	0	0	0	0	0	0	0	0	0	0	0	1				5872	8883;53948;67673	False;True;False	9509;58319;73082	17551;17552;109451;137327	23468;23469;146315;183902	23469;146315;183902			-1;-1				STAG1;DKFZp781D1416
Q8WVX3	Q8WVX3	1	1	1	Uncharacterized protein C4orf3	C4orf3	sp|Q8WVX3|CD003_HUMAN Uncharacterized protein C4orf3 OS=Homo sapiens OX=9606 GN=C4orf3 PE=1 SV=2	1	1	1	1	16.7	16.7	16.7	7.6035	66	66	1	-2	0	383.88	0	0	0	0	0	0	0	442.4	4413300	1	+			5875	40182	TRUE	43150	81331	109440	109440	5168	1	-1				C4orf3
Q92729	Q92729	1	1	1	Receptor-type tyrosine-protein phosphatase U	PTPRU	sp|Q92729|PTPRU_HUMAN Receptor-type tyrosine-protein phosphatase U OS=Homo sapiens OX=9606 GN=PTPRU PE=1 SV=2	1	1	1	1	1.1	1.1	1.1	162.42	1446	1446	0	52.381	0	0	0	0	0	0	0	0	0	0	0	1				5943	51960	TRUE	56185	105808	141612	141612			-1				PTPRU
Q93073	Q93073	1	1	1	Selenocysteine insertion sequence-binding protein 2-like	SECISBP2L	sp|Q93073|SBP2L_HUMAN Selenocysteine insertion sequence-binding protein 2-like OS=Homo sapiens OX=9606 GN=SECISBP2L PE=1 SV=3	1	1	1	1	1.6	1.6	1.6	121.77	1101	1101	0	4.6349	0	0	0	0	0	0	0	0	0	0	0	1				5984	47108	TRUE	51056	96184	129109	129109			-1				SECISBP2L
Q96DX4	Q96DX4	1	1	1	RING finger and SPRY domain-containing protein 1	RSPRY1	sp|Q96DX4|RSPRY_HUMAN RING finger and SPRY domain-containing protein 1 OS=Homo sapiens OX=9606 GN=RSPRY1 PE=1 SV=1	1	1	1	1	2.3	2.3	2.3	64.18	576	576	0	25.382	0	0	0	0	0	0	0	0	0	0	0	2				6066	4071	TRUE	4383	8521;8522	11606;11607	11606			-1				RSPRY1
Q96DX7	Q96DX7	1	1	1	Tripartite motif-containing protein 44	TRIM44	sp|Q96DX7|TRI44_HUMAN Tripartite motif-containing protein 44 OS=Homo sapiens OX=9606 GN=TRIM44 PE=1 SV=1	1	1	1	1	2.3	2.3	2.3	38.472	344	344	0.0098213	1.1288	0	0	0	0	0	0	0	0	0	0	0	1				6067	61727	TRUE	66682	125565	168250	168250			-1				TRIM44
Q96GM8	Q96GM8	1	1	1	Target of EGR1 protein 1	TOE1	sp|Q96GM8|TOE1_HUMAN Target of EGR1 protein 1 OS=Homo sapiens OX=9606 GN=TOE1 PE=1 SV=1	1	1	1	1	2.9	2.9	2.9	56.547	510	510	0	33.323	0	0	0	0	0	0	0	0	0	0	0	1				6110	3607	TRUE	3852	7486	10229	10229			-1				TOE1
Q96KR6	Q96KR6	1	1	1	Protein FAM210B	FAM210B	sp|Q96KR6|F210B_HUMAN Protein FAM210B, mitochondrial OS=Homo sapiens OX=9606 GN=FAM210B PE=1 SV=2	1	1	1	1	5.7	5.7	5.7	20.424	192	192	0.0067829	1.3293	0	0	0	0	0	0	0	0	0	0	0	1				6166	61367	TRUE	66294	124717	167130	167130			-1				FAM210B
Q96PP9	Q96PP9	1	1	1	Guanylate-binding protein 4	GBP4	sp|Q96PP9|GBP4_HUMAN Guanylate-binding protein 4 OS=Homo sapiens OX=9606 GN=GBP4 PE=2 SV=2	1	1	1	1	2	2	2	73.164	640	640	0	21.535	0	0	0	0	0	0	0	0	0	0	0	1				6205	21450	TRUE	22976	42269	56941	56941			-1				GBP4
Q99985	Q99985	1	1	1	Semaphorin-3C	SEMA3C	sp|Q99985|SEM3C_HUMAN Semaphorin-3C OS=Homo sapiens OX=9606 GN=SEMA3C PE=2 SV=2	1	1	1	1	1.5	1.5	1.5	85.206	751	751	0.00015946	3.351	0	0	0	0	0	0	0	0	0	0	0	1				6324	41279	TRUE	44806	84951	114212	114212			-1				SEMA3C
Q9BQ04;E9PB51;E9PLB0;E9PM61;D6R9K7;U3KQD5;J3QRR5	Q9BQ04;E9PB51;E9PLB0;E9PM61;D6R9K7;U3KQD5;J3QRR5	9;8;7;7;7;7;7	1;0;0;0;0;0;0	1;0;0;0;0;0;0	RNA-binding protein 4B	RBM4B;RBM4	sp|Q9BQ04|RBM4B_HUMAN RNA-binding protein 4B OS=Homo sapiens OX=9606 GN=RBM4B PE=1 SV=1;tr|E9PB51|E9PB51_HUMAN RNA-binding protein 4 (Fragment) OS=Homo sapiens OX=9606 GN=RBM4 PE=1 SV=1;tr|E9PLB0|E9PLB0_HUMAN RNA-binding protein 4B OS=Homo sapiens OX=9606	7	9	1	1	26.5	4.5	4.5	40.149	359	359;240;143;147;150;151;155	0	47.439	0	0	0	0	0	0	0	0	0	0	0	1				6331	11866;12645;18986;23186;34436;35108;44113;55512;59816	False;False;False;False;False;False;False;False;True	12731;13562;20334;24826;36883;37588;47853;59975;64620	23413;24987;37413;45662;69796;71086;90319;112615;121464	31283;33413;50360;61444;93881;95584;121227;150681;162662	31283;33413;50360;61444;93881;95584;121227;150681;162662			-1;-1;-1;-1;-1;-1;-1				RBM4B;RBM4
Q9BX59	Q9BX59	1	1	1	Tapasin-related protein	TAPBPL	sp|Q9BX59|TPSNR_HUMAN Tapasin-related protein OS=Homo sapiens OX=9606 GN=TAPBPL PE=1 SV=2	1	1	1	1	4.1	4.1	4.1	50.182	468	468	0	14.526	0	0	0	0	0	0	0	0	0	0	0	1				6448	13448	TRUE	14408	26480	35437	35437			-1				TAPBPL
Q9BZ29;A0A0A0MT38;A0A0D9SF41	Q9BZ29;A0A0A0MT38	25;13;1	1;1;1	1;1;1	Dedicator of cytokinesis protein 9	DOCK9	sp|Q9BZ29|DOCK9_HUMAN Dedicator of cytokinesis protein 9 OS=Homo sapiens OX=9606 GN=DOCK9 PE=1 SV=2;tr|A0A0A0MT38|A0A0A0MT38_HUMAN Dedicator of cytokinesis 9, isoform CRA_b OS=Homo sapiens OX=9606 GN=DOCK9 PE=1 SV=2	3	25	1	1	12.6	0.7	0.7	236.44	2069	2069;1254;69	1	-2	0	0	0	0	0	0	0	0	0	0	0	1	+			6485	1742;2026;5781;11747;13046;18422;24668;26880;27834;33382;35376;40421;40759;43860;49934;53281;54003;55336;56455;58434;59370;59409;59602;65933;65991	False;False;False;False;False;False;False;False;False;False;False;False;False;False;False;False;True;False;False;False;False;False;False;False;False	1868;2170;6229;12604;12605;13987;13988;19737;26418;28807;29813;35765;37870;43492;43994;47581;54047;57614;58383;59785;60982;63130;64130;64172;64173;64385;71236;71299	3784;4299;11945;23208;23209;23210;25709;25710;36182;36183;48538;54126;55913;55914;55915;55916;67612;71632;71633;81961;82989;89826;101856;108266;109551;111957;114425;118513;120557;120637;120638;121042;133954;134099	5338;6008;16114;31015;31016;31017;34395;34396;48621;48622;65255;72754;75091;75092;75093;75094;90655;96350;96351;110258;111558;120584;136318;144823;146441;149601;153110;158740;161484;161589;161590;162112;179449;179667	5338;6008;16114;31016;34395;48621;65255;72754;75094;90655;96350;110258;111558;120584;136318;144823;146441;149601;153110;158740;161484;161589;162112;179449;179667	255;256;257;258	940;1194;1586;2049	-1;-1;-1				DOCK9
Q9BZ71	Q9BZ71	1	1	1	Membrane-associated phosphatidylinositol transfer protein 3	PITPNM3	sp|Q9BZ71|PITM3_HUMAN Membrane-associated phosphatidylinositol transfer protein 3 OS=Homo sapiens OX=9606 GN=PITPNM3 PE=1 SV=2	1	1	1	1	1.7	1.7	1.7	106.78	974	974	0.00016466	3.8329	0	0	0	0	0	0	0	0	0	0	0	1				6487	4153	TRUE	4496	8724	11867	11867			-1				PITPNM3
Q9NPI1	Q9NPI1	1	1	1	Bromodomain-containing protein 7	BRD7	sp|Q9NPI1|BRD7_HUMAN Bromodomain-containing protein 7 OS=Homo sapiens OX=9606 GN=BRD7 PE=1 SV=1	1	1	1	1	2.3	2.3	2.3	74.138	651	651	0.0055726	1.4145	0	0	0	0	0	0	0	0	0	0	0	1				6748	42945	TRUE	46598	88118	118291	118291			-1				BRD7
Q9NSA2	Q9NSA2	3	1	1	Potassium voltage-gated channel subfamily D member 1	KCND1	sp|Q9NSA2|KCND1_HUMAN Potassium voltage-gated channel subfamily D member 1 OS=Homo sapiens OX=9606 GN=KCND1 PE=1 SV=2	1	3	1	1	3.9	1.7	1.7	71.33	647	647	0	8.1734	0	0	0	0	0	0	0	0	0	0	0	1				6816	28874;30788;52126	False;False;True	30907;32998;56371	58323;62193;62194;106121	78615;83765;83766;142010	78615;83765;142010			-1				KCND1
Q9NZL6	Q9NZL6	1	1	1	Ral guanine nucleotide dissociation stimulator-like 1	RGL1	sp|Q9NZL6|RGL1_HUMAN Ral guanine nucleotide dissociation stimulator-like 1 OS=Homo sapiens OX=9606 GN=RGL1 PE=1 SV=1	1	1	1	1	1.2	1.2	1.2	86.7	768	768	0.00030713	2.7908	0	0	0	0	0	0	0	0	0	0	0	1				6946	63465	TRUE	68599	129199	173143	173143			-1				RGL1
Q9Y4B5	Q9Y4B5	4	1	1	Microtubule cross-linking factor 1	MTCL1	sp|Q9Y4B5|MTCL1_HUMAN Microtubule cross-linking factor 1 OS=Homo sapiens OX=9606 GN=MTCL1 PE=1 SV=5	1	4	1	1	1.9	0.5	0.5	209.52	1905	1905	0.0017557	2.0944	0	0	0	0	0	0	0	0	0	0	0	1				7339	1364;10917;39003;52756	True;False;False;False	1458;11723;41729;57037	2767;21606;21607;78579;78580;107318	3806;28856;28857;28858;105716;105717;105718;143592	3806;28857;105716;143592			-1				MTCL1
Q9Y4D2	Q9Y4D2	2	2	2	Sn1-specific diacylglycerol lipase alpha	DAGLA	sp|Q9Y4D2|DGLA_HUMAN Diacylglycerol lipase-alpha OS=Homo sapiens OX=9606 GN=DAGLA PE=1 SV=3	1	2	2	2	2.6	2.6	2.6	114.95	1042	1042	0.00016545	3.9314	0	0	0	0	0	0	0	0	0	0	0	2				7343	36358;51441	True;True	38898;55639	73393;104949	98656;140500	98656;140500			-1				DAGLA
REV__Q5M9N0	REV__Q5M9N0	1	1	1			sp|Q5M9N0|CD158_HUMAN Coiled-coil domain-containing protein 158 OS=Homo sapiens OX=9606 GN=CCDC158 PE=2 SV=2	1	1	1	1	0	0	0	127.14	1113	1113	1	-2	0	0	0	0	0	0	0	0	0	0	0	1	+	+		7528	42327	TRUE	45915	86845	116660	116660	6162	24	-1
Q7Z3H1;Q9NZN9	Q7Z3H1;Q9NZN9	1;1	1;1	1;1	Aryl-hydrocarbon-interacting protein-like 1	DKFZp686O2183;AIPL1	tr|Q7Z3H1|Q7Z3H1_HUMAN Aryl-hydrocarbon-interacting protein-like 1 OS=Homo sapiens OX=9606 GN=AIPL1 PE=1 SV=1;sp|Q9NZN9|AIPL1_HUMAN Aryl-hydrocarbon-interacting protein-like 1 OS=Homo sapiens OX=9606 GN=AIPL1 PE=1 SV=2	2	1	1	1	2.7	2.7	2.7	42.395	372	372;384	1	-2	5598.4	6435	5786.3	5519.1	6439.8	5505.8	0	0	782520	7443.7	75039000	1	+			5383	62270	TRUE	67273	126732	169830	169830	5000	285	-1;-1				DKFZp686O2183;AIPL1
Q5RIP0;A0A0G2JIF0;A0A0G2JH50;A2BF26;A0A1W2PS56;A0A140TA19;A0A140T9S7;A0A140T9Q4	Q5RIP0;A0A0G2JIF0;A0A0G2JH50;A2BF26;A0A1W2PS56	7;7;7;7;5;3;3;3	1;1;1;1;1;1;1;1	1;1;1;1;1;1;1;1		HLA-Cw;HLA-C	tr|Q5RIP0|Q5RIP0_HUMAN HLA class I histocompatibility antigen OS=Homo sapiens OX=9606 GN=HLA-C PE=1 SV=1;tr|A0A0G2JIF0|A0A0G2JIF0_HUMAN HLA class I histocompatibility antigen, C alpha chain OS=Homo sapiens OX=9606 GN=HLA-C PE=1 SV=1;tr|A0A0G2JH50|A0A0G2JH5	8	7	1	1	22.4	2.7	2.7	40.912	366	366;368;372;397;244;224;261;261	0.0001634	3.71	25952	92686	158360	25463	21899	32810	449300	29139	20299	76457	124670000	2				457	4572;4573;8796;8797;25614;65058;67351	False;False;False;False;True;False;False	4941;4942;9418;9419;27433;70300;72739	9512;9513;17340;17341;17342;17343;17344;17345;17346;50595;50596;132385;132386;132387;136761;136762	12904;12905;12906;23174;23175;23176;23177;23178;23179;23180;23181;23182;68111;68112;177382;177383;177384;177385;177386;177387;183207;183208	12904;12906;23174;23177;68112;177382;183207			-1;-1;-1;-1;-1;-1;-1;-1				HLA-Cw;HLA-C
REV__Q2WGJ6	REV__Q2WGJ6	1	1	1			sp|Q2WGJ6|KLH38_HUMAN Kelch-like protein 38 OS=Homo sapiens OX=9606 GN=KLHL38 PE=1 SV=3	1	1	1	1	0	0	0	65.54	581	581	0.0071962	1.3231	2735	13794	7556.2	9678.6	36952	44329	53811	2156.2	1184.8	25509	48997000	1		+		7523	43522	TRUE	47218	89184	119731	119731			-1
A8MW49;P07148	A8MW49;P07148	5;5	5;5	5;5	Fatty acid-binding protein, liver	FABP1	tr|A8MW49|A8MW49_HUMAN Fatty acid-binding protein 1 OS=Homo sapiens OX=9606 GN=FABP1 PE=1 SV=1;sp|P07148|FABPL_HUMAN Fatty acid-binding protein, liver OS=Homo sapiens OX=9606 GN=FABP1 PE=1 SV=1	2	5	5	5	42.7	42.7	42.7	13.808	124	124;127	0	18.771	67873	73957	461010	115280	1860500	76080	39329	89068	78273	94897	1231900000	8				1034	2860;20525;25366;59572;67105	True;True;True;True;True	3057;21980;27161;64352;72480	6051;40460;50078;120956;136309	8295;54531;67439;67440;162010;162011;162012;182640	8295;54531;67439;162012;182640			-1;-1				FABP1
A0A024R6I7;A0A0G2JRN3;A0A0G2JPK4	A0A024R6I7;A0A0G2JRN3	24;19;1	2;2;0	2;2;0		SERPINA1	tr|A0A024R6I7|A0A024R6I7_HUMAN Alpha-1-antitrypsin OS=Homo sapiens OX=9606 GN=SERPINA1 PE=1 SV=1;tr|A0A0G2JRN3|A0A0G2JRN3_HUMAN Alpha-1-antitrypsin OS=Homo sapiens OX=9606 GN=SERPINA1 PE=1 SV=1	3	24	2	2	49.3	5.7	5.7	46.708	418	418;359;421	0	28.547	40825	765120	47946	51566	45194	44412	43214	51551	43292	49147	1120700000	7				8	6235;11279;19592;19614;19615;19932;24876;31983;32309;34862;37453;38173;38387;39583;39584;46138;49482;50698;53598;55123;61225;64678;65184;65185	False;True;False;False;False;False;False;False;False;False;False;False;False;False;False;False;False;False;False;False;False;False;False;True	6706;12112;20987;21010;21011;21360;21361;26641;34271;34621;37329;37330;40086;40840;41071;41072;42339;42340;50003;53564;54851;57953;59555;66145;69900;70431;70432	12787;12788;22319;22320;38560;38561;38562;38563;38564;38593;38594;38595;38596;38597;38598;39247;39248;48951;64818;65451;65452;65453;70591;70592;70593;70594;70595;70596;70597;70598;70599;70600;70601;70602;70603;70604;70605;70606;75645;75646;75647;75648;75649;77089;77090;77091;77469;77470;77471;79729;79730;79731;79732;79733;79734;79735;79736;79737;94316;94317;100885;103462;103463;108857;108858;1088…	17261;17262;17263;17264;29798;29799;29800;51865;51866;51867;51868;51869;51870;51871;51872;51873;51907;51908;51909;51910;51911;51912;51913;52822;52823;65811;87088;87860;87861;87862;87863;87864;94915;94916;94917;94918;94919;94920;94921;94922;94923;94924;94925;94926;94927;94928;94929;94930;94931;94932;94933;94934;94935;94936;101779;101780;101781;101782;101783;103728;103729;103730;103731;103732;10373…	17262;29799;51866;51907;51911;52822;65811;87088;87861;94917;101781;103731;104244;107309;107315;126657;135112;138411;145572;148965;166734;176410;177633;177634	19;20;21;22;23	250;266;375;382;398	-1;-1;-1				SERPINA1
Q99541;Q5SYF5;Q5SYF3;Q5SYF4	Q99541	10;3;2;2	10;3;2;2	10;3;2;2	Perilipin-2	PLIN2	sp|Q99541|PLIN2_HUMAN Perilipin-2 OS=Homo sapiens OX=9606 GN=PLIN2 PE=1 SV=2	4	10	10	10	27	27	27	48.075	437	437;125;110;126	0	43.154	253820	881080	303660	110930	322650	166150	155670	178940	499810	321330	645040000	11				6277	6648;7971;10761;11200;21260;29555;34124;37011;52377;55280	True;True;True;True;True;True;True;True;True;True	7148;8541;11562;12029;22772;31667;36556;39622;56633;59725	13599;15805;21298;22147;22148;41945;59779;69152;74694;106613;111870	18341;21127;28425;29557;29558;56521;80549;92911;100363;142668;149498	18341;21127;28425;29557;56521;80549;92911;100363;142668;149498			-1;-1;-1;-1				PLIN2
P00326	P00326	14	1	1	Alcohol dehydrogenase 1C	ADH1C	sp|P00326|ADH1G_HUMAN Alcohol dehydrogenase 1C OS=Homo sapiens OX=9606 GN=ADH1C PE=1 SV=2	1	14	1	1	31.2	2.4	2.4	39.867	375	375	0.0075967	1.3016	3362.8	5043.7	14970	5018.5	47411	2769	2021	4002.2	4509	5258.1	171820000	2				2967	15361;15362;16047;24983;24984;27426;28458;28459;29259;32105;32138;38925;43115;61923	False;False;False;False;False;False;False;False;True;False;False;False;False;False	16437;16438;17216;26749;26750;29383;30477;30478;31344;34406;34440;41645;41646;46778;66895	30267;30268;30269;30270;31709;31710;49177;49178;49179;49180;55219;55220;55221;57532;57533;57534;57535;57536;57537;57538;59217;59218;65056;65111;65112;65113;65114;65115;65116;65117;65118;65119;78440;78441;78442;78443;78444;78445;88417;126050	40509;40510;40511;40512;40513;42478;42479;66149;66150;66151;66152;66153;74164;74165;74166;74167;77577;77578;77579;77580;77581;77582;77583;77584;79823;79824;87379;87380;87446;87447;87448;87449;87450;87451;87452;87453;87454;105525;105526;105527;105528;105529;105530;105531;105532;105533;105534;118667;118668;168945;168946;168947	40510;40513;42479;66151;66152;74166;77577;77579;79824;87380;87446;105529;118668;168946			-1				ADH1C
P09210;Q5JW85;Q16772;P08263	P09210;Q5JW85;Q16772;P08263	3;2;2;2	3;2;2;2	2;1;1;1	Glutathione S-transferase A2;Glutathione S-transferase;Glutathione S-transferase A3;Glutathione S-transferase A1;Glutathione S-transferase A1, N-terminally processed	GSTA2;GSTA3;GSTA1	sp|P09210|GSTA2_HUMAN Glutathione S-transferase A2 OS=Homo sapiens OX=9606 GN=GSTA2 PE=1 SV=4;tr|Q5JW85|Q5JW85_HUMAN Glutathione transferase OS=Homo sapiens OX=9606 GN=GSTA3 PE=1 SV=1;sp|Q16772|GSTA3_HUMAN Glutathione S-transferase A3 OS=Homo sapiens OX=96	4	3	3	2	10.4	10.4	6.8	25.664	222	222;172;222;222	0.00015387	2.8343	33697	37664	159580	40293	293770	38632	25603	32482	41908	35333	144040000	3				3218	19747;30073;32913	True;True;True	21148;32241;35264	38865;60853;66705	52312;82010;89497	52312;82010;89497			-1;-1;-1;-1				GSTA2;GSTA3;GSTA1
P05089;A0A5F9ZH78;A0A5F9ZGN6	P05089;A0A5F9ZH78	3;2;1	3;2;1	3;2;1	Arginase-1	ARG1	sp|P05089|ARGI1_HUMAN Arginase-1 OS=Homo sapiens OX=9606 GN=ARG1 PE=1 SV=2;tr|A0A5F9ZH78|A0A5F9ZH78_HUMAN Arginase-1 OS=Homo sapiens OX=9606 GN=ARG1 PE=1 SV=1	3	3	3	3	8.1	8.1	8.1	34.735	322	322;237;304	0	4.5797	6375.8	9228	17726	9654.9	104750	11200	7245.7	10105	12157	8025.9	39597000	3				3100	9500;30889;57148	True;True;True	10173;33103;61729	18793;62361;115855	25111;83982;155021	25111;83982;155021			-1;-1;-1				ARG1
G3V1N2	G3V1N2	7	1	1		HBA2	tr|G3V1N2|G3V1N2_HUMAN HCG1745306, isoform CRA_a OS=Homo sapiens OX=9606 GN=HBA2 PE=1 SV=1	1	7	1	1	68.2	7.3	7.3	11.948	110	110	0.0012016	2.4368	293400	795840	482720	146370	712560	382840	108920	303010	931750	239820	14711000000	18				1873	19568;19762;37965;40222;59661;59813;60545	False;True;False;False;False;False;False	20962;21163;40625;43207;43208;64450;64616;64617;65409	38507;38508;38509;38510;38511;38512;38513;38514;38515;38516;38517;38884;38885;38886;38887;38888;38889;76665;76666;76667;76668;76669;76670;76671;76672;76673;76674;76675;76676;76677;76678;76679;76680;76681;76682;76683;76684;76685;76686;76687;76688;76689;81432;81433;81434;81435;81436;81437;81438;81439;81440;81441;81442;81443;81444;81445;81446;81447;81448;81449;81450;81451;81452;81453;81454;81455;814…	51799;51800;51801;51802;51803;51804;51805;51806;51807;51808;51809;51810;52336;52337;52338;52339;52340;52341;52342;52343;52344;52345;52346;52347;52348;52349;52350;52351;52352;52353;103136;103137;103138;103139;103140;103141;103142;103143;103144;103145;103146;103147;103148;103149;103150;103151;103152;103153;103154;103155;103156;103157;103158;103159;103160;103161;103162;103163;103164;103165;103166;10…	51800;52342;103151;109654;162298;162656;164887	964;1326	1;45	-1				HBA2
P05062;A0A3B3IS80;A0A087WXX2;A0A3B3ITZ0	P05062;A0A3B3IS80;A0A087WXX2	11;10;7;3	9;8;5;3	9;8;5;3	Fructose-bisphosphate aldolase B;Fructose-bisphosphate aldolase	ALDOB	sp|P05062|ALDOB_HUMAN Fructose-bisphosphate aldolase B OS=Homo sapiens OX=9606 GN=ALDOB PE=1 SV=2;tr|A0A3B3IS80|A0A3B3IS80_HUMAN Fructose-bisphosphate aldolase OS=Homo sapiens OX=9606 GN=ALDOB PE=1 SV=1;tr|A0A087WXX2|A0A087WXX2_HUMAN Fructose-bisphosphate	4	11	9	9	32.1	28.3	28.3	39.473	364	364;342;316;75	0	46.728	166390	192260	347360	213650	2227600	171640	134160	206610	197000	192250	1086400000	17				3098	3721;3997;12657;17711;22905;23046;31388;33553;38121;60914;62120	True;True;True;True;True;False;True;True;True;True;False	3974;4269;13575;18984;24526;24527;24680;33633;35949;40786;65806;67110	7696;8256;8257;25007;34750;45102;45103;45104;45105;45381;45382;45383;45384;45385;45386;63483;63484;63485;67920;76954;123782;126439;126440;126441;126442;126443;126444;126445;126446;126447;126448;126449;126450	10487;11244;11245;33440;46615;60710;60711;60712;60713;60714;61077;61078;61079;61080;61081;61082;61083;61084;61085;61086;61087;61088;61089;85398;85399;85400;91050;91051;103535;165859;169456;169457;169458;169459;169460;169461;169462;169463;169464;169465;169466;169467;169468;169469;169470;169471;169472;169473;169474;169475;169476;169477;169478	10487;11245;33440;46615;60714;61080;85398;91051;103535;165859;169456	2285;2286;2287	40;329;333	-1;-1;-1;-1				ALDOB
Q93088;E5RJH0	Q93088;E5RJH0	6;4	6;4	4;2	Betaine--homocysteine S-methyltransferase 1	BHMT	sp|Q93088|BHMT1_HUMAN Betaine--homocysteine S-methyltransferase 1 OS=Homo sapiens OX=9606 GN=BHMT PE=1 SV=2;tr|E5RJH0|E5RJH0_HUMAN Betaine--homocysteine S-methyltransferase 1 OS=Homo sapiens OX=9606 GN=BHMT PE=1 SV=1	2	6	6	4	18.2	18.2	12.3	44.998	406	406;253	0	19.935	49443	63868	219770	71304	538070	51669	45632	54617	59421	66299	277960000	6				5986	2471;2736;12664;24845;29991;66444	True;True;True;True;True;True	2639;2922;13582;26609;32138;71778	5224;5804;25020;48898;60660;134924	7230;7973;33454;65740;81777;180729	7230;7973;33454;65740;81777;180729	5250	383	-1;-1				BHMT
P31327;A0A669KBF2;Q5R211	P31327;A0A669KBF2	34;17;9	34;17;9	30;15;9	Carbamoyl-phosphate synthase [ammonia], mitochondrial	CPS1	sp|P31327|CPSM_HUMAN Carbamoyl-phosphate synthase [ammonia], mitochondrial OS=Homo sapiens OX=9606 GN=CPS1 PE=1 SV=2;tr|A0A669KBF2|A0A669KBF2_HUMAN Carbamoyl-phosphate synthase [ammonia], mitochondrial (Fragment) OS=Homo sapiens OX=9606 GN=CPS1 PE=1 SV=1	3	34	34	30	24.4	24.4	22.4	164.94	1500	1500;660;513	0	110.52	755080	763970	772300	641340	7320600	731050	549240	810180	850210	668860	2853000000	48				3693	177;1927;2772;4075;4925;5833;6265;11974;14649;17590;17915;18323;19593;19660;20646;20962;23432;24320;26371;36647;42262;50785;51761;54221;55076;56567;57565;59410;60083;62382;62818;63096;64440;66614	True;True;True;True;True;True;True;True;True;True;True;True;True;True;True;True;True;True;True;True;True;True;True;True;True;True;True;True;True;True;True;True;True;True	184;2066;2067;2964;2965;4390;5311;6283;6742;12848;15687;18856;19198;19199;19635;20988;21058;22114;22455;25084;26055;28245;39247;45846;54945;55977;58611;59507;61102;62185;64174;64917;67391;67392;67873;67874;68206;69641;71956	288;4130;4131;4132;5881;5882;5883;8540;10163;12025;12884;23647;23648;28889;34487;35288;35289;35290;36021;38565;38717;40706;41365;41366;46122;47909;52525;74076;86731;103651;105474;105475;109938;111387;114667;116686;120639;122108;126964;126965;127814;127815;128503;131012;135417	367;5783;5784;5785;8064;8065;8066;11640;13771;16209;17393;31587;31588;38649;46269;47470;47471;47472;48420;51874;52115;54857;55738;55739;62023;64441;64442;70543;99568;116512;138725;138726;141183;141184;146936;148860;153459;153460;156096;161591;163583;170148;170149;171285;171286;172202;175542;181405	367;5784;8066;11640;13771;16209;17393;31588;38649;46269;47472;48420;51874;52115;54857;55738;62023;64442;70543;99568;116512;138726;141184;146936;148860;153460;156096;161591;163583;170148;171286;172202;175542;181405	3227;3228;3229;3230;3231;3232	462;542;616;862;1178;1283	-1;-1;-1				CPS1
A0A140T9W2;Q53YP1;A0A140T9U0;A0A140T9M0;A0A140T9T1;A0A1W2PNZ7;F8W9Z8;A0A140TA03;A0A140T9Z7;A0A0G2JKJ1;A0A140TA12;A0A0G2JPT2	A0A140T9W2;Q53YP1;A0A140T9U0;A0A140T9M0;A0A140T9T1;A0A1W2PNZ7	8;8;8;8;6;5;3;3;3;2;2;1	1;1;1;1;1;1;0;0;0;0;0;0	1;1;1;1;1;1;0;0;0;0;0;0		HLA-C	tr|A0A140T9W2|A0A140T9W2_HUMAN HLA class I histocompatibility antigen, C alpha chain OS=Homo sapiens OX=9606 GN=HLA-C PE=1 SV=1;tr|Q53YP1|Q53YP1_HUMAN HLA class I histocompatibility antigen OS=Homo sapiens OX=9606 GN=HLA-C PE=1 SV=1;tr|A0A140T9U0|A0A140T9U	12	8	1	1	25.9	2.8	2.8	39.94	355	355;366;368;372;261;244;131;131;131;131;131;49	0.00015552	2.9986	55400	76065	24289	16239	63771	20889	20886	18652	20901	71902	20314000	2				541	4572;4573;18878;25522;41243;55326;65058;67351	False;False;False;True;False;False;False;False	4941;4942;20218;27330;44761;59775;70300;72739	9512;9513;37184;50405;84861;111944;132385;132386;132387;136761;136762	12904;12905;12906;50063;50064;67869;67870;114107;149583;177382;177383;177384;177385;177386;177387;183207;183208	12904;12906;50063;67870;114107;149583;177382;183207			-1;-1;-1;-1;-1;-1;-1;-1;-1;-1;-1;-1				HLA-C
A0A0G2JMB2;A0A286YEY5;P01877	A0A0G2JMB2;A0A286YEY5;P01877	9;7;7	1;1;1	1;1;1	Ig alpha-2 chain C region	IGHA2	tr|A0A0G2JMB2|A0A0G2JMB2_HUMAN Immunoglobulin heavy constant alpha 2 (Fragment) OS=Homo sapiens OX=9606 GN=IGHA2 PE=1 SV=1;tr|A0A286YEY5|A0A286YEY5_HUMAN Immunoglobulin heavy constant alpha 2 (Fragment) OS=Homo sapiens OX=9606 GN=IGHA2 PE=1 SV=1;sp|P01877|	3	9	1	1	27.4	4.4	4.4	36.508	340	340;391;340	0	12.077	92420	92018	569070	33114	448360	365900	84010	188260	81052	75804	283420000	3				473	7900;21622;45448;50774;55243;59767;59768;65350;66779	True;False;False;False;False;False;False;False;False	8469;23160;23161;49274;54934;59685;64568;64569;70611;72125	15693;15694;42589;42590;92940;92941;103602;111748;121360;121361;121362;132916;132917;132918;135678;135679;135680;135681	20975;20976;20977;57383;57384;124863;124864;124865;138612;149336;162527;162528;162529;162530;162531;178053;178054;178055;178056;178057;181734;181735;181736;181737;181738;181739;181740;181741;181742	20975;57383;124863;138612;149336;162528;162530;178054;181737	358	301	-1;-1;-1				IGHA2
O95954;H7C315	O95954;H7C315	2;1	2;1	2;1	Formimidoyltransferase-cyclodeaminase;Glutamate formimidoyltransferase;Formimidoyltetrahydrofolate cyclodeaminase	FTCD	sp|O95954|FTCD_HUMAN Formimidoyltransferase-cyclodeaminase OS=Homo sapiens OX=9606 GN=FTCD PE=1 SV=2;tr|H7C315|H7C315_HUMAN Formimidoyltransferase-cyclodeaminase (Fragment) OS=Homo sapiens OX=9606 GN=FTCD PE=1 SV=1	2	2	2	2	3.1	3.1	3.1	58.926	541	541;133	0.00016046	3.4394	14696	19048	38696	23968	209820	27902	12845	20822	20684	22520	46116000	2				2955	51038;63950	True;True	55214;69119	104243;130055	139564;174223	139564;174223			-1;-1				FTCD
A0A0G2JQJ7;A0A0G2JS76;I3L2Z2	A0A0G2JQJ7;A0A0G2JS76	50;49;5	3;3;0	3;3;0			tr|A0A0G2JQJ7|A0A0G2JQJ7_HUMAN Microtubule-associated protein OS=Homo sapiens OX=9606 GN=MAPT PE=1 SV=1;tr|A0A0G2JS76|A0A0G2JS76_HUMAN Microtubule-associated protein OS=Homo sapiens OX=9606 GN=MAPT PE=1 SV=1	3	50	3	3	59.1	4.5	4.5	78.954	758	758;776;59	0	5.7293	88886	49280	85329	34838	88092	147660	30270	47483	136360	36238	135540000	4				479	274;1735;5340;9044;9045;10619;12153;13653;17246;20876;20909;23110;24104;24105;24106;24171;25733;26658;26669;26977;28284;28285;28294;31097;31852;33375;33483;37711;37712;38600;43431;44336;45299;45300;47016;47106;52165;52533;53760;54166;54196;54883;55985;58230;58237;58265;58266;63461;64715;67567	False;False;False;False;False;False;False;False;False;False;False;True;False;False;False;False;False;True;False;False;False;False;False;False;False;False;False;False;False;False;False;False;False;False;False;False;False;False;False;False;False;False;False;False;False;False;False;False;False;True	282;1861;5753;9682;9683;11413;11414;13038;14624;18486;22359;22395;24748;25826;25827;25828;25896;27558;28572;28584;28911;30285;30286;30295;33318;33319;34135;35757;35873;40361;40362;40363;41298;47121;48085;49116;49117;49118;49119;50962;51054;56411;56800;58122;58552;58553;58584;59308;60479;62911;62919;62949;62950;68594;69941;72971	490;491;3777;11049;11050;17839;17840;17841;17842;21036;21037;21038;21039;21040;21041;21042;21043;21044;21045;21046;21047;24009;26843;33848;33849;33850;33851;33852;41137;41138;41139;41140;41141;41208;45524;47540;47541;47542;47543;47662;50848;50849;50850;53490;53491;53516;54326;56830;56831;56832;56833;56844;56845;56846;56847;56848;62776;62777;62778;62779;64592;67602;67798;67799;76093;76094;76095;76…	651;652;653;654;5330;14934;14935;23828;23829;23830;23831;23832;23833;28091;28092;28093;28094;28095;28096;28097;28098;28099;28100;28101;28102;28103;28104;28105;32140;35916;45410;45411;45412;45413;45414;45415;45416;45417;45418;45419;45420;55435;55436;55437;55438;55439;55440;55526;61259;63948;63949;63950;63951;63952;63953;64129;68427;68428;68429;71884;71885;71925;73008;73009;73010;76383;76384;76385;…	652;5330;14935;23828;23832;28104;32140;35916;45420;55437;55526;61259;63948;63949;63953;64129;68427;71885;71925;73010;76383;76387;76400;84505;86803;90644;90898;102349;102350;104778;119506;121739;124518;124541;128910;129105;142095;143038;145926;146832;146891;148414;151990;157698;157759;157842;157848;173138;176547;183692	367;368;369	11;31;567	-1;-1;-1
C9JR83;E9PD53;Q9NTJ3;C9JVD8;C9J578;C9J9E4	C9JR83;E9PD53;Q9NTJ3;C9JVD8;C9J578;C9J9E4	2;2;2;1;1;1	2;2;2;1;1;1	2;2;2;1;1;1	Structural maintenance of chromosomes protein;Structural maintenance of chromosomes protein 4	SMC4	tr|C9JR83|C9JR83_HUMAN Structural maintenance of chromosomes protein 4 (Fragment) OS=Homo sapiens OX=9606 GN=SMC4 PE=1 SV=1;tr|E9PD53|E9PD53_HUMAN Structural maintenance of chromosomes protein OS=Homo sapiens OX=9606 GN=SMC4 PE=1 SV=1;sp|Q9NTJ3|SMC4_HUMAN	6	2	2	2	3.5	3.5	3.5	48.329	423	423;1263;1288;119;139;157	0.0042469	1.5826	20819	16741	16172	19717	13557	16299	19085	82046	20719	77761	1451200000	2				1313	11585;60837	True;True	12432;65724	22899;123628	30599;165661	30599;165661			-1;-1;-1;-1;-1;-1				SMC4
A0A0D9SFB5;P08319;H0Y9N0;D6R9K8;D6RIB1	A0A0D9SFB5;P08319	7;7;2;2;1	7;7;2;2;1	7;7;2;2;1	Alcohol dehydrogenase 4	ADH4	tr|A0A0D9SFB5|A0A0D9SFB5_HUMAN All-trans-retinol dehydrogenase [NAD(+)] ADH4 OS=Homo sapiens OX=9606 GN=ADH4 PE=1 SV=1;sp|P08319|ADH4_HUMAN All-trans-retinol dehydrogenase [NAD(+)] ADH4 OS=Homo sapiens OX=9606 GN=ADH4 PE=1 SV=5	5	7	7	7	19.7	19.7	19.7	41.598	391	391;380;115;257;206	0	25.816	95310	99620	424340	118920	799710	97856	68250	111870	101880	101080	502940000	10				444	3462;22637;27443;28520;29929;55020;57208	True;True;True;True;True;True;True	3701;24244;29402;30539;32066;32067;59449;61800	7226;44561;55255;55256;57629;57630;60485;60486;111284;115973	9889;60018;74209;74210;77696;77697;81527;81528;148722;155166	9889;60018;74209;77697;81527;148722;155166	340	368	-1;-1;-1;-1;-1				ADH4
CON__P02533;P02533;CON__Q6IFX2;C9JM50;K7ESE1;K7EMS3;K7ENV3	CON__P02533;P02533;CON__Q6IFX2	20;20;10;4;3;2;1	20;20;10;4;3;2;1	4;4;3;0;0;0;0	Keratin, type I cytoskeletal 14	KRT14	;sp|P02533|K1C14_HUMAN Keratin, type I cytoskeletal 14 OS=Homo sapiens OX=9606 GN=KRT14 PE=1 SV=4;	7	20	20	4	38.8	38.8	11.2	51.621	472	472;472;452;196;95;181;48	0	76.009	420680	327190	873350	414650	2565500	312480	1339700	442430	368920	488870	2548100000	32			+	1342	4524;5282;5283;7710;12016;17828;24385;29808;32584;33110;34147;41015;42156;45694;51395;56245;58608;62192;64244;66042	True;True;True;True;True;True;True;True;True;True;True;True;True;True;True;True;True;True;True;True	4890;5690;5691;8264;12892;19106;26124;31933;34914;35475;36579;44392;45734;49532;49533;55589;60759;63316;67190;69430;69431;71355	9418;10952;10953;15296;23723;23724;34992;34993;48058;60256;60257;65993;67085;69195;83965;86503;86504;86505;93377;93378;104868;114051;118977;118978;126593;130545;130546;130547;130548;134191;134192	12781;14806;14807;20444;31698;31699;46982;46983;64653;81248;81249;88516;89971;92981;112893;116201;116202;116203;125421;125422;140400;152631;159342;159343;159344;169649;174873;174874;174875;174876;179784;179785	12781;14806;14807;20444;31699;46983;64653;81248;88516;89971;92981;112893;116202;125422;140400;152631;159343;169649;174876;179785	965;966;967;968;969	14;119;212;257;272	-1;-1;-1;-1;-1;-1;-1				KRT14
F8W8D4;F8WAT6	F8W8D4	11;1	1;1	0;0		UBA3	tr|F8W8D4|F8W8D4_HUMAN NEDD8-activating enzyme E1 catalytic subunit OS=Homo sapiens OX=9606 GN=UBA3 PE=1 SV=1	2	11	1	0	33.4	5.2	0	47.271	422	422;64	0.0017485	2.0303	648.76	318.06	299.69	362.63	432.66	304.39	0	0	601.16	961.32	6948800	1				1838	1015;1866;5388;16101;29559;31413;36954;45648;46100;53473;57866	True;False;False;False;False;False;False;False;False;False;False	1084;2000;5804;17282;31671;33667;39563;49484;49964;49965;57821;62503	2045;4009;11121;31827;31828;59784;59785;63572;74596;93287;94258;94259;94260;94261;108641;117208;117209;117210;117211	2820;5627;15015;42669;42670;80557;80558;85496;85497;85498;100233;125298;126585;126586;126587;126588;145299;145300;145301;156793;156794;156795;156796;156797;156798	2820;5627;15015;42670;80557;85498;100233;125298;126588;145300;156797	1315;1316	8;60	-1;-1				UBA3
P35527;CON__P35527;K7EQQ3	P35527;CON__P35527;K7EQQ3	17;16;9	17;16;9	17;16;9	Keratin, type I cytoskeletal 9	KRT9	sp|P35527|K1C9_HUMAN Keratin, type I cytoskeletal 9 OS=Homo sapiens OX=9606 GN=KRT9 PE=1 SV=3;;tr|K7EQQ3|K7EQQ3_HUMAN Keratin, type I cytoskeletal 9 OS=Homo sapiens OX=9606 GN=KRT9 PE=1 SV=1	3	17	17	17	33.9	33.9	33.9	62.064	623	623;623;390	0	181.32	363190	265830	883510	377350	2262500	267580	1007900	382340	308550	447960	2874500000	30			+	3743	10647;14643;19026;20416;20419;22589;22590;26082;29573;44172;45559;45901;48130;51940;54854;57655;63347	True;True;True;True;True;True;True;True;True;True;True;True;True;True;True;True;True	11444;15681;20374;20375;21869;21872;24195;24196;27936;31685;47918;49392;49757;52138;52139;56162;59276;62283;68472	21096;28879;28880;37472;37473;40185;40186;40189;44487;44488;51811;59840;90429;93165;93826;93827;98119;98120;98121;105773;111004;116866;116867;128987;128988	28172;38635;38636;50436;50437;54102;54103;54106;59924;59925;69663;80707;80708;121372;125157;126028;126029;131672;131673;131674;131675;141569;148336;156342;156343;172889;172890;172891;172892;172893	28172;38635;50436;54102;54106;59924;59925;69663;80707;121372;125157;126029;131674;141569;148336;156343;172890	3299;3300	245;326	-1;-1;-1				KRT9
P02675;D6REL8;CON__P02676	P02675;D6REL8	32;23;6	32;23;6	32;23;6	Fibrinogen beta chain;Fibrinopeptide B;Fibrinogen beta chain	FGB	sp|P02675|FIBB_HUMAN Fibrinogen beta chain OS=Homo sapiens OX=9606 GN=FGB PE=1 SV=2;tr|D6REL8|D6REL8_HUMAN Fibrinogen beta chain OS=Homo sapiens OX=9606 GN=FGB PE=1 SV=1	3	32	32	32	64.4	64.4	64.4	55.928	491	491;272;495	0	323.31	2084800	4139500	6445500	1567200	4573400	4584700	4092000	2546300	2848900	2279900	33892000000	159				3036	2729;2730;7026;10322;10333;12746;12747;12899;13185;22406;22753;24826;26075;26665;30911;31659;34199;44088;45066;45067;45765;48780;48781;52400;57927;57928;58110;58111;58112;64904;67098;67709	True;True;True;True;True;True;True;True;True;True;True;True;True;True;True;True;True;True;True;True;True;True;True;True;True;True;True;True;True;True;True;True	2915;2916;7552;11095;11106;13668;13669;13827;14132;24000;24001;24365;26585;27927;27928;28580;33127;33934;33935;36637;36638;47826;48857;48858;49606;52819;52820;56658;62590;62591;62592;62787;62788;62789;70138;70139;72473;73120;73121	5789;5790;5791;5792;5793;5794;5795;14226;14227;20437;20454;20455;20456;20457;20458;20459;25183;25184;25185;25186;25187;25188;25431;25959;25960;44150;44151;44152;44153;44154;44155;44156;44767;44768;44769;48836;51796;51797;53502;53503;53504;53505;53506;53507;62400;62401;64146;64147;64148;64149;69346;69347;69348;69349;69350;69351;90278;92103;92104;92105;92106;92107;92108;93527;93528;93529;93530;9353…	7947;7948;7949;7950;7951;7952;7953;7954;7955;7956;7957;19114;19115;27259;27279;27280;27281;27282;27283;27284;27285;27286;33690;33691;33692;33693;33694;33695;34012;34013;34725;34726;34727;59478;59479;59480;59481;59482;59483;59484;59485;59486;59487;59488;59489;59490;59491;60263;60264;60265;65655;69646;69647;71896;71897;71898;71899;71900;71901;71902;71903;71904;71905;71906;71907;71908;71909;71910;71…	7952;7957;19115;27259;27279;33690;33694;34013;34726;59488;60263;65655;69646;71910;84032;86205;93211;121182;123618;123621;125622;133238;133243;142714;156991;156993;157416;157423;157425;177036;182622;184017	2193;2194;2195;2196;2197;2198	220;254;272;397;456;468	-1;-1;-1				FGB
P04196	P04196	8	8	8	Histidine-rich glycoprotein	HRG	sp|P04196|HRG_HUMAN Histidine-rich glycoprotein OS=Homo sapiens OX=9606 GN=HRG PE=1 SV=1	1	8	8	8	17.7	17.7	17.7	59.578	525	525	0	23.277	93306	206180	513510	112340	118000	74862	93235	64256	135450	136950	630660000	9				3077	3286;3287;9144;22387;26568;46094;66529;67610	True;True;True;True;True;True;True;True	3514;3515;9789;23981;28472;49958;71867;73017	6938;6939;18020;18021;44114;53137;94244;135084;137232	9514;9515;24068;24069;59433;71415;126568;180927;183783	9514;9515;24069;59433;71415;126568;180927;183783			-1				HRG
Q14749	Q14749	2	2	2	Glycine N-methyltransferase	GNMT	sp|Q14749|GNMT_HUMAN Glycine N-methyltransferase OS=Homo sapiens OX=9606 GN=GNMT PE=1 SV=3	1	2	2	2	10.8	10.8	10.8	32.742	295	295	0	17.737	4576.8	5021.8	12885	7158.3	52574	5606.3	4761.8	6006.8	6378.7	5082.3	22015000	2				4727	11784;52845	True;True	12643;57128	23281;107454	31110;143777	31110;143777			-1				GNMT
CON__P08779;P08779;CON__Q9Z2K1;CON__Q3ZAW8;K7ENW6	CON__P08779;P08779;CON__Q9Z2K1;CON__Q3ZAW8	17;17;11;11;6	6;6;2;2;4	6;6;2;2;4	Keratin, type I cytoskeletal 16	KRT16	;sp|P08779|K1C16_HUMAN Keratin, type I cytoskeletal 16 OS=Homo sapiens OX=9606 GN=KRT16 PE=1 SV=4;;	5	17	6	6	33.8	16.7	16.7	51.267	473	473;473;469;474;162	0	28.303	47750	55554	125770	74252	392690	51150	235420	64216	53120	64112	668580000	12			+	1351	4523;5282;5283;12016;17825;24366;28966;29808;32584;33110;34147;45694;51628;58608;62192;64244;65970	True;False;False;False;True;True;True;False;False;False;False;False;True;False;False;False;True	4889;5690;5691;12892;19103;26104;26105;31011;31933;34914;35475;36579;49532;49533;55837;63316;67190;69430;69431;71276	9416;9417;10952;10953;23723;23724;34989;48025;48026;48027;48028;58507;60256;60257;65993;67085;69195;93377;93378;105256;105257;118977;118978;126593;130545;130546;130547;130548;134063;134064	12779;12780;14806;14807;31698;31699;46979;64612;64613;64614;64615;78852;81248;81249;88516;89971;92981;125421;125422;140898;140899;159342;159343;159344;169649;174873;174874;174875;174876;179619;179620	12780;14806;14807;31699;46979;64614;78852;81248;88516;89971;92981;125422;140898;159343;169649;174876;179620	968;969;976	14;121;274	-1;-1;-1;-1;-1				KRT16
P04259	P04259	16	1	1	Keratin, type II cytoskeletal 6B	KRT6B	sp|P04259|K2C6B_HUMAN Keratin, type II cytoskeletal 6B OS=Homo sapiens OX=9606 GN=KRT6B PE=1 SV=5	1	16	1	1	21.6	1.6	1.6	60.066	564	564	0.0086313	1.1862	27344	18015	54306	22962	88624	29026	43755	17050	16005	15905	45292000	1				3079	1227;4968;5659;18684;19624;31119;31904;35902;42491;46330;53181;55519;63646;65501;65922;65923	False;False;False;False;False;False;False;False;False;True;False;False;False;False;False;False	1312;5357;6101;20012;21020;33343;33344;34188;38429;46090;50204;57478;59982;68792;70772;71225;71226	2504;10252;11705;36757;36758;36759;38610;38611;38612;38613;38614;38615;38616;38617;38618;38619;38620;38621;38622;38623;38624;38625;38626;38627;38628;38629;38630;38631;38632;38633;38634;38635;38636;38637;38638;38639;38640;38641;38642;38643;38644;38645;38646;38647;38648;38649;38650;38651;38652;38653;38654;38655;38656;38657;38658;38659;38660;38661;38662;38663;38664;38665;62831;62832;62833;62834;6283…	3439;13892;15783;49451;49452;49453;51933;51934;51935;51936;51937;51938;51939;51940;51941;51942;51943;51944;51945;51946;51947;51948;51949;51950;51951;51952;51953;51954;51955;51956;51957;51958;51959;51960;51961;51962;51963;51964;51965;51966;51967;51968;51969;51970;51971;51972;51973;51974;51975;51976;51977;51978;51979;51980;51981;51982;51983;51984;51985;51986;51987;51988;51989;51990;51991;51992;5199…	3439;13892;15783;49451;51977;84575;86892;97596;117041;127119;144537;150693;173542;178371;179421;179422	970	279	-1				KRT6B
K7ERI9;P02654;K7EJI9;K7ELM9;K7EPF9;K7EKP1	K7ERI9;P02654;K7EJI9;K7ELM9;K7EPF9;K7EKP1	6;6;4;4;4;3	6;6;4;4;4;3	6;6;4;4;4;3	Apolipoprotein C-I;Truncated apolipoprotein C-I	APOC1	tr|K7ERI9|K7ERI9_HUMAN Apolipoprotein C-I (Fragment) OS=Homo sapiens OX=9606 GN=APOC1 PE=1 SV=1;sp|P02654|APOC1_HUMAN Apolipoprotein C-I OS=Homo sapiens OX=9606 GN=APOC1 PE=1 SV=1;tr|K7EJI9|K7EJI9_HUMAN Apolipoprotein C-I OS=Homo sapiens OX=9606 GN=APOC1 P	6	6	6	6	40.3	40.3	40.3	8.647	77	77;83;83;92;129;53	0	16.578	214680	597020	657730	172220	223900	157100	155470	162350	301440	446380	2119900000	9				2335	13769;13770;18304;35612;40924;47624	True;True;True;True;True;True	14742;14743;19615;38126;44247;44248;51608	27027;27028;27029;35993;72099;83677;83678;97147	36150;36151;36152;36153;48383;96953;112533;112534;130366	36150;36153;48383;96953;112533;130366			-1;-1;-1;-1;-1;-1				APOC1
P02538;CON__P02538;P48668;CON__P48668;CON__P50446;CON__O95678;F8W0C6;O95678;CON__Q8BGZ7;CON__P07744;CON__Q7RTS7;F8W1S1;H0YIN9;Q7RTS7;CON__Q14CN4-1;CON__Q6IME9;Q14CN4	P02538;CON__P02538;P48668;CON__P48668;CON__P50446;CON__O95678;F8W0C6;O95678	18;18;17;17;10;9;9;9;8;5;3;3;3;3;2;2;2	9;9;8;8;3;2;3;2;1;0;0;0;1;0;1;1;1	2;2;1;1;0;0;0;0;0;0;0;0;0;0;0;0;0	Keratin, type II cytoskeletal 6A;Keratin, type II cytoskeletal 6C;Keratin, type II cytoskeletal 75	KRT6A;KRT6C;KRT5;KRT75	sp|P02538|K2C6A_HUMAN Keratin, type II cytoskeletal 6A OS=Homo sapiens OX=9606 GN=KRT6A PE=1 SV=3;;sp|P48668|K2C6C_HUMAN Keratin, type II cytoskeletal 6C OS=Homo sapiens OX=9606 GN=KRT6C PE=1 SV=3;;;;tr|F8W0C6|F8W0C6_HUMAN Keratin, type II cytoskeletal 5 (	17	18	9	2	25.2	17.4	4.8	60.044	564	564;564;564;564;553;551;178;551;551;525;529;543;196;529;511;520;511	0	52.88	275100	273060	611670	328310	1899800	258550	933020	344180	352180	335180	1120500000	19			+	1343	1227;2855;4968;18684;19624;31119;31904;35902;42491;46336;51929;53181;55519;63646;65501;65922;65923;65947	True;True;False;False;False;True;False;False;False;True;True;True;True;False;True;False;False;True	1312;3052;5357;20012;21020;33343;33344;34188;38429;46090;50210;56151;57478;59982;68792;70772;71225;71226;71251	2504;6043;6044;10252;36757;36758;36759;38610;38611;38612;38613;38614;38615;38616;38617;38618;38619;38620;38621;38622;38623;38624;38625;38626;38627;38628;38629;38630;38631;38632;38633;38634;38635;38636;38637;38638;38639;38640;38641;38642;38643;38644;38645;38646;38647;38648;38649;38650;38651;38652;38653;38654;38655;38656;38657;38658;38659;38660;38661;38662;38663;38664;38665;62831;62832;62833;62834;…	3439;8285;8286;8287;13892;49451;49452;49453;51933;51934;51935;51936;51937;51938;51939;51940;51941;51942;51943;51944;51945;51946;51947;51948;51949;51950;51951;51952;51953;51954;51955;51956;51957;51958;51959;51960;51961;51962;51963;51964;51965;51966;51967;51968;51969;51970;51971;51972;51973;51974;51975;51976;51977;51978;51979;51980;51981;51982;51983;51984;51985;51986;51987;51988;51989;51990;51991;5…	3439;8287;13892;49451;51977;84575;86892;97596;117041;127130;141557;144537;150693;173542;178371;179421;179422;179547	970	279	-1;-1;-1;-1;-1;-1;-1;-1;-1;-1;-1;-1;-1;-1;-1;-1;-1				KRT6A;KRT6C;KRT5;KRT75
D6REY1;Q13231	D6REY1;Q13231	1;1	1;1	1;1	Chitotriosidase-1	CHIT1	tr|D6REY1|D6REY1_HUMAN Chitotriosidase-1 OS=Homo sapiens OX=9606 GN=CHIT1 PE=1 SV=1;sp|Q13231|CHIT1_HUMAN Chitotriosidase-1 OS=Homo sapiens OX=9606 GN=CHIT1 PE=1 SV=1	2	1	1	1	4.4	4.4	4.4	40.238	361	361;466	0.00016075	3.4701	24590	48547	30072	13818	33072	19019	12997	14389	23012	13106	18367000	1				1413	61284	TRUE	66207	124577	166942	166942			-1;-1				CHIT1
P07327	P07327	14	4	3	Alcohol dehydrogenase 1A	ADH1A	sp|P07327|ADH1A_HUMAN Alcohol dehydrogenase 1A OS=Homo sapiens OX=9606 GN=ADH1A PE=1 SV=2	1	14	4	3	36	13.1	9.3	39.858	375	375	0	33.1	56163	74275	170770	71910	448330	76483	56507	69298	70629	71972	267410000	6				3157	15361;15362;16047;21037;27426;28458;28459;29258;32105;32138;38925;41679;43115;61921	False;False;False;True;False;False;False;False;True;False;False;True;False;True	16437;16438;17216;22534;29383;30477;30478;31343;34406;34440;41645;41646;45238;46778;66893	30267;30268;30269;30270;31709;31710;41514;41515;55219;55220;55221;57532;57533;57534;57535;57536;57537;57538;59214;59215;59216;65056;65111;65112;65113;65114;65115;65116;65117;65118;65119;78440;78441;78442;78443;78444;78445;85700;88417;126047	40509;40510;40511;40512;40513;42478;42479;55939;55940;74164;74165;74166;74167;77577;77578;77579;77580;77581;77582;77583;77584;79816;79817;79818;79819;79820;79821;79822;87379;87380;87446;87447;87448;87449;87450;87451;87452;87453;87454;105525;105526;105527;105528;105529;105530;105531;105532;105533;105534;115159;118667;118668;168942	40510;40513;42479;55939;74166;77577;77579;79817;87380;87446;105529;115159;118668;168942			-1				ADH1A
P04264;CON__P04264	P04264;CON__P04264	33;31	33;31	23;21	Keratin, type II cytoskeletal 1	KRT1	sp|P04264|K2C1_HUMAN Keratin, type II cytoskeletal 1 OS=Homo sapiens OX=9606 GN=KRT1 PE=1 SV=6;	2	33	33	23	45.2	45.2	36	66.038	644	644;644	0	323.31	1216000	765940	2221200	1038400	6140200	776530	3094700	1227000	1017000	1360000	29597000000	77			+	3080	1296;4967;11516;11993;19626;22432;24582;24770;27820;31121;32313;32885;36624;37957;42491;42904;42905;46186;46187;46188;50174;51380;51936;52485;52970;53163;54360;57008;57609;57939;65168;65922;65923	True;True;True;True;True;True;True;True;True;True;True;True;True;True;True;True;True;True;True;True;True;True;True;True;True;True;True;True;True;True;True;True;True	1388;5356;12358;12867;12868;21022;24027;26330;26526;29799;33346;34627;35233;39221;40617;46090;46547;46548;46549;50054;50055;50056;54300;55572;56158;56746;57263;57460;58755;61578;62230;62610;70412;71225;71226	2646;10251;22782;23682;23683;38667;44195;44196;48394;48734;55893;62839;62840;62841;62842;62843;65465;66641;66642;66643;66644;66645;66646;66647;66648;66649;66650;66651;66652;66653;74041;76642;76643;76644;76645;87152;87153;87995;87996;87997;94413;94414;94415;102421;102422;102423;104839;104840;105769;106799;107711;107990;107991;107992;110178;115542;116759;116760;117401;132551;133936;133937	3640;3641;13891;30452;31639;31640;52050;52051;52052;59539;59540;59541;65072;65525;75068;75069;84581;84582;84583;84584;84585;84586;84587;87878;89410;89411;89412;89413;89414;89415;89416;89417;89418;89419;89420;89421;89422;89423;99528;103109;103110;103111;103112;117040;117041;118127;118128;118129;126778;126779;126780;126781;126782;126783;137042;137043;137044;137045;140367;140368;141565;142932;144120…	3641;13891;30452;31640;52051;59540;65072;65525;75069;84583;87878;89418;99528;103112;117041;118128;118129;126780;126782;126783;137044;140367;141565;142932;144120;144474;147261;154603;156193;157025;177585;179421;179422	2238;2239	262;469	-1;-1				KRT1
CON__P04259	CON__P04259	17	1	0				1	17	1	0	23.4	3	0	59.998	564	564	0	10.021	5477.4	5354.8	15384	9059.1	43216	6006	22131	7099.9	10747	8688	26198000	1			+	1348	1227;4968;5659;18684;19624;31119;31904;35902;42491;46336;53181;55519;63646;65501;65922;65923;65947	False;False;True;False;False;False;False;False;False;False;False;False;False;False;False;False;False	1312;5357;6101;20012;21020;33343;33344;34188;38429;46090;50210;57478;59982;68792;70772;71225;71226;71251	2504;10252;11705;36757;36758;36759;38610;38611;38612;38613;38614;38615;38616;38617;38618;38619;38620;38621;38622;38623;38624;38625;38626;38627;38628;38629;38630;38631;38632;38633;38634;38635;38636;38637;38638;38639;38640;38641;38642;38643;38644;38645;38646;38647;38648;38649;38650;38651;38652;38653;38654;38655;38656;38657;38658;38659;38660;38661;38662;38663;38664;38665;62831;62832;62833;62834;6283…	3439;13892;15783;49451;49452;49453;51933;51934;51935;51936;51937;51938;51939;51940;51941;51942;51943;51944;51945;51946;51947;51948;51949;51950;51951;51952;51953;51954;51955;51956;51957;51958;51959;51960;51961;51962;51963;51964;51965;51966;51967;51968;51969;51970;51971;51972;51973;51974;51975;51976;51977;51978;51979;51980;51981;51982;51983;51984;51985;51986;51987;51988;51989;51990;51991;51992;5199…	3439;13892;15783;49451;51977;84575;86892;97596;117041;127130;144537;150693;173542;178371;179421;179422;179547	970	279	-1
CON__P13645;P13645;CON__P02535-1;K7EMD9;CON__Q7Z3Y7;Q7Z3Y7;CON__Q7Z3Y8;CON__Q2M2I5;Q7Z3Y8;Q2M2I5;CON__Q7Z3Z0;Q7Z3Z0;A0A1B0GVI3	CON__P13645;P13645	19;19;7;4;4;4;3;3;3;3;2;2;1	16;16;5;3;2;2;2;2;2;2;1;1;1	12;12;3;0;0;0;0;0;0;0;0;0;1	Keratin, type I cytoskeletal 10	KRT10	;sp|P13645|K1C10_HUMAN Keratin, type I cytoskeletal 10 OS=Homo sapiens OX=9606 GN=KRT10 PE=1 SV=6	13	19	16	12	31	26.8	23.3	59.51	593	593;584;570;165;486;464;459;525;459;525;450;450;107	0	119.26	552800	223730	497550	258720	1441900	209020	593170	315050	325830	354170	2538000000	25			+	1353	1842;3341;7700;24664;29854;32584;33110;34074;42154;42155;47676;47775;47776;52904;54101;54589;62193;64244;65998	True;True;True;True;True;False;False;True;True;True;True;True;True;True;True;True;True;False;True	1976;3572;8254;26414;31985;34914;35475;36503;45732;45733;51662;51766;51767;57189;58484;58995;67191;69430;69431;71307	3968;7036;15276;15277;48534;60372;60373;65993;67085;69079;86501;86502;97220;97221;97365;97366;97367;107568;109716;110523;126594;130545;130546;130547;130548;134115;134116	5572;9658;20410;20411;65250;65251;81395;81396;88516;89971;92822;116199;116200;130464;130465;130650;130651;130652;130653;143929;143930;143931;146671;147689;169650;174873;174874;174875;174876;179691;179692	5572;9658;20411;65251;81396;88516;89971;92822;116199;116200;130465;130650;130652;143930;146671;147689;169650;174876;179691	969	150	-1;-1;-1;-1;-1;-1;-1;-1;-1;-1;-1;-1;-1				KRT10
O00757	O00757	3	2	2	Fructose-1,6-bisphosphatase isozyme 2	FBP2	sp|O00757|F16P2_HUMAN Fructose-1,6-bisphosphatase isozyme 2 OS=Homo sapiens OX=9606 GN=FBP2 PE=1 SV=2	1	3	2	2	7.7	5.6	5.6	36.743	339	339	0	4.3698	37654	49936	47492	28014	100420	25277	25259	24149	55357	57407	253100000	2				2443	3018;30837;58668	False;True;True	3229;33049;63377	6372;62274;119122	8723;83870;159557	8723;83870;159557			-1				FBP2
Q2UY09;H7C3P2;H7BZU0	Q2UY09	16;5;4	16;5;4	16;5;4	Collagen alpha-1(XXVIII) chain	COL28A1	sp|Q2UY09|COSA1_HUMAN Collagen alpha-1(XXVIII) chain OS=Homo sapiens OX=9606 GN=COL28A1 PE=2 SV=2	3	16	16	16	12.5	12.5	12.5	116.66	1125	1125;142;80	0	145.9	533880	1516700	1130000	480810	1058200	710200	547680	479560	774480	763740	7918100000	45				4908	7149;8722;12792;14837;19964;28048;28203;41631;43098;48174;52780;60000;60022;60023;64641;64642	True;True;True;True;True;True;True;True;True;True;True;True;True;True;True;True	7676;9338;13717;15886;21396;30037;30202;45189;46758;52187;57062;64822;64846;64847;69861;69862;69863;69864	14402;14403;17172;25249;29237;29238;39303;56361;56694;56695;85625;85626;88390;88391;88392;98196;107357;121900;121942;121943;121944;121945;131581;131582;131583;131584;131585;131586;131587	19330;19331;22927;33767;39099;39100;39101;52893;75728;75729;75730;76193;76194;76195;76196;76197;76198;76199;115059;115060;115061;118632;118633;118634;118635;131774;143647;163252;163304;163305;163306;163307;163308;163309;163310;163311;176328;176329;176330;176331;176332;176333;176334;176335;176336	19330;22927;33767;39101;52893;75728;76194;115060;118634;131774;143647;163252;163307;163309;176330;176336	4828	159	-1;-1;-1				COL28A1
H0YNU5;A0A3B3IT82;P54132;H0YLV8	H0YNU5;A0A3B3IT82;P54132	3;3;3;1	3;3;3;1	3;3;3;1	Bloom syndrome protein	BLM	tr|H0YNU5|H0YNU5_HUMAN DNA helicase OS=Homo sapiens OX=9606 GN=BLM PE=1 SV=1;tr|A0A3B3IT82|A0A3B3IT82_HUMAN DNA helicase OS=Homo sapiens OX=9606 GN=BLM PE=1 SV=1;sp|P54132|BLM_HUMAN Bloom syndrome protein OS=Homo sapiens OX=9606 GN=BLM PE=1 SV=1	4	3	3	3	3.3	3.3	3.3	144.47	1286	1286;1386;1417;413	0.001749	2.0356	117230	232450	193460	296190	1062100	389930	723950	144450	146270	165800	8509100000	10				776	20172;36481;52919	True;True;True	21614;39022;57204	39741;39742;39743;73610;107585	53510;53511;53512;53513;53514;53515;53516;98942;98943;143950	53511;98942;143950			-1;-1;-1;-1				BLM
P13284	P13284	2	2	2	Gamma-interferon-inducible lysosomal thiol reductase	IFI30	sp|P13284|GILT_HUMAN Gamma-interferon-inducible lysosomal thiol reductase OS=Homo sapiens OX=9606 GN=IFI30 PE=1 SV=3	1	2	2	2	8	8	8	27.963	250	250	0	5.2937	52796	88737	60648	27340	44616	36478	49404	32270	54387	39744	59405000	3				3333	7340;23683	True;True	7876;25367	14713;46669;46670	19718;62793;62794	19718;62794			-1				IFI30
P51884;CON__Q05443	P51884	12;5	12;5	12;5	Lumican	LUM	sp|P51884|LUM_HUMAN Lumican OS=Homo sapiens OX=9606 GN=LUM PE=1 SV=2	2	12	12	12	34.6	34.6	34.6	38.429	338	338;342	0	224.46	855350	3212400	2808300	1269900	2154600	1237900	994520	677920	1290900	1863900	20724000000	60				4034	12841;19874;28865;29963;30070;30071;35593;37105;43023;52709;52781;55169	True;True;True;True;True;True;True;True;True;True;True;True	13768;21301;30898;32106;32238;32239;38106;39722;46681;56988;57063;59610;59611	25340;39141;58309;60598;60841;60842;60843;60844;60845;60846;60847;60848;72061;72062;74850;88251;88252;88253;88254;88255;88256;88257;107230;107231;107232;107233;107234;107235;107358;111581;111582;111583;111584;111585;111586;111587	33891;52687;78589;78590;78591;78592;81698;81699;81995;81996;81997;81998;81999;82000;82001;82002;82003;82004;96905;96906;96907;96908;100572;118460;118461;118462;118463;118464;118465;118466;118467;118468;118469;118470;143474;143475;143476;143477;143478;143479;143480;143481;143648;149115;149116;149117;149118;149119;149120;149121;149122;149123;149124;149125;149126;149127;149128;149129;149130;149131	33891;52687;78591;81699;82000;82003;96907;100572;118462;143477;143648;149131	3754	63	-1;-1				LUM
REV__A8MPP7;REV__A8MPY5;REV__Q9UPE1;REV__E7ETV6	REV__A8MPP7;REV__A8MPY5;REV__Q9UPE1;REV__E7ETV6	1;1;1;1	1;1;1;1	1;1;1;1			tr|A8MPP7|A8MPP7_HUMAN SRSF protein kinase 3 OS=Homo sapiens OX=9606 GN=SRPK3 PE=1 SV=1;tr|A8MPY5|A8MPY5_HUMAN SRSF protein kinase 3 OS=Homo sapiens OX=9606 GN=SRPK3 PE=1 SV=1;sp|Q9UPE1|SRPK3_HUMAN SRSF protein kinase 3 OS=Homo sapiens OX=9606 GN=SRPK3 PE=	4	1	1	1	0	0	0	55.43	492	492;534;567;634	0.0042475	1.5836	15914	42928	30781	18135	29568	15233	18519	8232.8	15589	27841	1498500000	2		+		7463	10822	TRUE	11624	21416;21417	28589;28590	28589			-1;-1;-1;-1
P21549	P21549	3	3	3	Serine--pyruvate aminotransferase	AGXT	sp|P21549|SPYA_HUMAN Serine--pyruvate aminotransferase OS=Homo sapiens OX=9606 GN=AGXT PE=1 SV=1	1	3	3	3	6.6	6.6	6.6	43.009	392	392	0.004381	1.5602	55290	57647	55921	54171	397900	54559	38738	59766	57389	52328	41961000	3				3506	5979;36450;45793	True;True;True	6438;38991;49639	12283;73538;93625	16539;98846;125768	16539;98846;125768			-1				AGXT
Q06278;H7BXF7;H7C3Q1	Q06278	9;2;1	9;2;1	8;2;1	Aldehyde oxidase	AOX1	sp|Q06278|AOXA_HUMAN Aldehyde oxidase OS=Homo sapiens OX=9606 GN=AOX1 PE=1 SV=2	3	9	9	8	7.2	7.2	6.4	147.92	1338	1338;193;190	0	12.624	100190	137520	170000	97422	715510	100170	78354	127470	110380	112120	292820000	10				4447	7672;9339;14599;23332;25540;34318;45420;58009;66023	True;True;True;True;True;True;True;True;True	8226;9997;15631;24978;27349;36765;49244;62682;71334	15234;18451;28766;45949;45950;50431;69619;92887;117526;134158	20356;24654;38477;61821;61822;67901;93641;124790;157191;179743	20356;24654;38477;61821;67901;93641;124790;157191;179743			-1;-1;-1				AOX1
P02776;P10720	P02776;P10720	2;1	2;1	2;1	Platelet factor 4;Platelet factor 4, short form;Platelet factor 4 variant;Platelet factor 4 variant(4-74);Platelet factor 4 variant(5-74);Platelet factor 4 variant(6-74)	PF4;PF4V1	sp|P02776|PLF4_HUMAN Platelet factor 4 OS=Homo sapiens OX=9606 GN=PF4 PE=1 SV=2;sp|P10720|PF4V_HUMAN Platelet factor 4 variant OS=Homo sapiens OX=9606 GN=PF4V1 PE=1 SV=1	2	2	2	2	25.7	25.7	25.7	10.845	101	101;104	0	8.3747	33930	42525	193940	23637	47435	56484	41859	50567	47837	54248	185540000	2				3055	2463;27400	True;True	2630;29356	5214;55182	7217;74107	7217;74107			-1;-1				PF4;PF4V1
A0A182DWH4	A0A182DWH4	3	1	1			tr|A0A182DWH4|A0A182DWH4_HUMAN HLA class II histocompatibility antigen, DR beta 3 chain OS=Homo sapiens OX=9606 GN=HLA-DRB3 PE=1 SV=1	1	3	1	1	11.7	3.8	3.8	29.941	266	266	0.0006092	2.6519	32974	57326	1490.4	16963	36872	3343.4	3106.4	5300.5	3937	3690.3	19258000	1				548	18881;22756;25925	False;False;True	20221;24368;27769	37187;44772;51457	50067;60268;69213	50067;60268;69213			-1
P20774;Q5TBF5	P20774;Q5TBF5	13;7	13;7	13;7	Mimecan	OGN	sp|P20774|MIME_HUMAN Mimecan OS=Homo sapiens OX=9606 GN=OGN PE=1 SV=1;tr|Q5TBF5|Q5TBF5_HUMAN Mimecan (Fragment) OS=Homo sapiens OX=9606 GN=OGN PE=1 SV=1	2	13	13	13	35.2	35.2	35.2	33.922	298	298;268	0	65.172	478370	1416500	1152100	519330	822570	643280	495220	389660	610840	733940	18732000000	37				3491	8560;8561;10814;15000;17032;17736;26573;27726;33955;38199;38684;49518;61839	True;True;True;True;True;True;True;True;True;True;True;True;True	9162;9163;11616;16060;18259;19010;28478;29697;36374;40866;41384;53600;66800	16892;16893;16894;21399;21400;21401;29642;29643;33491;34790;53146;55740;55741;68850;68851;68852;77145;78024;78025;78026;78027;100958;100959;100960;125784	22572;22573;22574;22575;22576;22577;28568;28569;28570;28571;39691;39692;44941;44942;46672;71425;74863;74864;92529;92530;92531;92532;103811;104985;104986;104987;104988;104989;104990;104991;135202;135203;135204;135205;135206;135207;168539	22573;22577;28571;39692;44942;46672;71425;74864;92529;103811;104987;135203;168539			-1;-1				OGN
P05787;CON__P05787;F8VUG2;F8W1U3;CON__H-INV:HIT000292931;CON__P08729;P08729;CON__Q3KNV1;CON__Q9H552;CON__Q9NSB2;CON__Q6ISB0;Q9NSB2;F8VP67;CON__H-INV:HIT000016045;F8VS61;F8VQY3;CON__Q3SY84;H0YHD9;Q3SY84	P05787;CON__P05787;F8VUG2;F8W1U3;CON__H-INV:HIT000292931;CON__P08729;P08729;CON__Q3KNV1	12;12;7;7;6;6;6;6;5;4;4;4;3;3;1;1;1;1;1	3;3;1;1;1;0;0;0;0;0;0;0;0;0;0;1;0;0;0	3;3;1;1;1;0;0;0;0;0;0;0;0;0;0;1;0;0;0	Keratin, type II cytoskeletal 8;Keratin, type II cytoskeletal 7	KRT8;KRT7	sp|P05787|K2C8_HUMAN Keratin, type II cytoskeletal 8 OS=Homo sapiens OX=9606 GN=KRT8 PE=1 SV=7;;tr|F8VUG2|F8VUG2_HUMAN Keratin, type II cytoskeletal 8 (Fragment) OS=Homo sapiens OX=9606 GN=KRT8 PE=1 SV=1;tr|F8W1U3|F8W1U3_HUMAN Keratin, type II cytoskeletal	19	12	3	3	15.3	5.8	5.8	53.704	483	483;483;273;289;443;469;469;469;499;600;600;600;113;99;248;180;523;143;523	0	6.877	38354	61038	69407	47614	127740	37074	35153	19316	44705	371970	177900000	4			+	1349	18684;19624;31908;32884;35908;37189;42491;55473;63646;65922;65923;65946	False;False;False;False;False;True;False;True;False;False;False;True	20012;21020;34192;35232;38435;39809;46090;59930;68792;71225;71226;71250	36757;36758;36759;38610;38611;38612;38613;38614;38615;38616;38617;38618;38619;38620;38621;38622;38623;38624;38625;38626;38627;38628;38629;38630;38631;38632;38633;38634;38635;38636;38637;38638;38639;38640;38641;38642;38643;38644;38645;38646;38647;38648;38649;38650;38651;38652;38653;38654;38655;38656;38657;38658;38659;38660;38661;38662;38663;38664;38665;64685;64686;66626;66627;66628;66629;66630;666…	49451;49452;49453;51933;51934;51935;51936;51937;51938;51939;51940;51941;51942;51943;51944;51945;51946;51947;51948;51949;51950;51951;51952;51953;51954;51955;51956;51957;51958;51959;51960;51961;51962;51963;51964;51965;51966;51967;51968;51969;51970;51971;51972;51973;51974;51975;51976;51977;51978;51979;51980;51981;51982;51983;51984;51985;51986;51987;51988;51989;51990;51991;51992;51993;51994;51995;519…	49451;51977;86909;89400;97713;100780;117041;150024;173542;179421;179422;179546			-1;-1;-1;-1;-1;-1;-1;-1;-1;-1;-1;-1;-1;-1;-1;-1;-1;-1;-1				KRT8;KRT7
REV__F8VRN8;REV__F8VQE1;REV__Q9UHB6	REV__F8VRN8;REV__F8VQE1;REV__Q9UHB6	1;1;1	1;1;1	1;1;1			tr|F8VRN8|F8VRN8_HUMAN LIM domain and actin-binding protein 1 OS=Homo sapiens OX=9606 GN=LIMA1 PE=1 SV=1;tr|F8VQE1|F8VQE1_HUMAN LIM domain and actin-binding protein 1 OS=Homo sapiens OX=9606 GN=LIMA1 PE=1 SV=1;sp|Q9UHB6|LIMA1_HUMAN LIM domain and actin-bin	3	1	1	1	0	0	0	43.19	388	388;598;759	0.0098226	1.129	7282.1	12472	11623	4116.8	30338	27388	42530	19216	9510.6	12841	61686000	1		+		7487	9450	TRUE	10120	18683	24971	24971			-1;-1;-1
Q9BXD5;A0A087WZ70	Q9BXD5	3;1	3;1	3;1	N-acetylneuraminate lyase	NPL	sp|Q9BXD5|NPL_HUMAN N-acetylneuraminate lyase OS=Homo sapiens OX=9606 GN=NPL PE=1 SV=1	2	3	3	3	9.1	9.1	9.1	35.162	320	320;230	0	9.8155	45522	92092	69349	28941	50768	37064	40355	40318	82994	51096	67772000	4				6454	13892;47985;58038	True;True;True	14870;51985;62712	27232;27233;97817;117573	36400;36401;131255;157250	36401;131255;157250			-1;-1				NPL
CON__P34955	CON__P34955	3	3	3				1	3	3	3	6.5	6.5	6.5	46.103	416	416	0.00016343	3.7107	38028	49433	49459	40307	44263	41389	37979	11334	50253	644720	169000000	3			+	1355	467;1115;8608	True;True;True	483;1193;9213	858;2315;16969	1147;3193;22666	1147;3193;22666			-1
P02671;A0A087WUA0;CON__P02672	P02671	35;14;2	35;14;2	35;14;2	Fibrinogen alpha chain;Fibrinopeptide A;Fibrinogen alpha chain	FGA	sp|P02671|FIBA_HUMAN Fibrinogen alpha chain OS=Homo sapiens OX=9606 GN=FGA PE=1 SV=2	3	35	35	35	35.6	35.6	35.6	94.972	866	866;289;615	0	323.31	2091900	4182600	5245300	1595600	4907900	4548100	4421600	3228700	3547800	2567000	56790000000	174				3035	3854;4820;9954;10847;10937;11031;11892;17865;21448;21449;21615;22607;23341;24546;26528;26713;34271;40106;40470;43133;43199;43200;43540;44379;45695;45696;45974;46409;48945;49468;54154;59382;59383;63451;64298	True;True;True;True;True;True;True;True;True;True;True;True;True;True;True;True;True;True;True;True;True;True;True;True;True;True;True;True;True;True;True;True;True;True;True	4110;4111;5200;10651;11649;11746;11845;11846;12759;19146;22974;22975;23153;24214;24988;26291;28429;28629;36715;43051;43052;43565;43566;46797;46867;46868;47237;48128;49534;49535;49833;50287;52994;53550;58539;64142;64143;68584;69490	7929;7930;7931;9989;19586;21464;21465;21466;21467;21641;21815;21816;21817;21818;21819;21820;21821;21822;23473;35200;35201;35202;35203;35204;35205;35206;35207;42265;42266;42267;42268;42580;44519;45971;45972;45973;45974;48337;48338;48339;53056;53057;53058;53747;53748;53749;69458;81137;81138;81139;81140;81141;81142;81143;81144;81145;81146;81147;81148;81149;81150;82125;82126;82127;82128;82129;82130;8…	10799;10800;10801;13551;13552;26106;28642;28643;28644;28645;28646;28647;28648;28895;29111;29112;29113;29114;29115;29116;29117;29118;29119;29120;29121;31359;31360;47352;47353;47354;47355;47356;47357;47358;47359;47360;47361;56937;56938;56939;56940;57371;57372;59965;59966;61844;61845;61846;61847;61848;61849;65001;65002;65003;65004;65005;65006;71312;71313;71314;71315;71316;72269;72270;72271;72272;722…	10800;13551;26106;28644;28895;29118;31360;47355;56938;56939;57371;59965;61844;65006;71315;72270;93345;109216;110494;118700;118908;118909;119798;121828;125423;125426;126195;127304;133666;135091;146793;161519;161526;173116;175033	2189;2190;2191;2192	110;226;254;259	-1;-1;-1				FGA
A0A096LPE2;P35542;A0A3B3ISW8;E9PR14;G3V1D9	A0A096LPE2;P35542	6;4;2;2;2	4;4;0;0;0	4;4;0;0;0	Serum amyloid A-4 protein	SAA2-SAA4;SAA4	tr|A0A096LPE2|A0A096LPE2_HUMAN SAA2-SAA4 readthrough OS=Homo sapiens OX=9606 GN=SAA2-SAA4 PE=3 SV=1;sp|P35542|SAA4_HUMAN Serum amyloid A-4 protein OS=Homo sapiens OX=9606 GN=SAA4 PE=1 SV=2	5	6	4	4	23.1	15.4	15.4	23.353	208	208;130;77;80;113	0.00015696	3.11	34638	122880	131900	37503	92926	37255	33747	50018	71625	67379	252640000	4				238	12513;20239;23869;23870;23970;51975	False;True;False;True;True;True	13424;21683;25586;25587;25687;56200	24732;24733;39855;47142;47143;47338;105830	33080;33081;53655;63425;63426;63683;141641	33081;53655;63425;63426;63683;141641			-1;-1;-1;-1;-1				SAA2-SAA4;SAA4
P02008;A0A494C057	P02008;A0A494C057	4;2	3;2	3;2	Hemoglobin subunit zeta	HBZ	sp|P02008|HBAZ_HUMAN Hemoglobin subunit zeta OS=Homo sapiens OX=9606 GN=HBZ PE=1 SV=2;tr|A0A494C057|A0A494C057_HUMAN Hemoglobin subunit zeta (Fragment) OS=Homo sapiens OX=9606 GN=HBZ PE=1 SV=1	2	4	3	3	28.9	23.9	23.9	15.637	142	142;56	0	13.104	56925	63029	39820	36679	173870	54026	33883	55596	125270	78785	110400000	3				3024	30136;34453;60545;64409	True;True;False;True	32308;36901;65409;69609	60962;69824;123055;123056;123057;123058;123059;123060;123061;123062;123063;123064;123065;123066;123067;123068;130886	82141;93918;164871;164872;164873;164874;164875;164876;164877;164878;164879;164880;164881;164882;164883;164884;164885;164886;164887;164888;164889;164890;164891;164892;164893;164894;164895;164896;164897;164898;164899;164900;164901;175343	82141;93918;164887;175343			-1;-1				HBZ
P02792	P02792	7	7	7	Ferritin light chain	FTL	sp|P02792|FRIL_HUMAN Ferritin light chain OS=Homo sapiens OX=9606 GN=FTL PE=1 SV=2	1	7	7	7	44.6	44.6	44.6	20.019	175	175	0	65.716	2197400	780520	488120	466030	605680	557760	496570	493700	559900	708430	5167200000	24				3059	482;3450;32043;32044;34766;36778;56035	True;True;True;True;True;True;True	500;501;3689;34337;34338;34339;37229;39385;60533	887;888;889;890;7211;7212;64920;64921;64922;64923;64924;64925;64926;70395;70396;74306;74307;74308;113685	1179;1180;1181;1182;1183;9869;9870;9871;9872;9873;87206;87207;87208;87209;87210;87211;87212;87213;94673;94674;99855;99856;99857;152149	1183;9870;87207;87211;94674;99855;152149	2217	97	-1				FTL
C9JKG1	C9JKG1	7	1	1		BGN	tr|C9JKG1|C9JKG1_HUMAN Biglycan (Fragment) OS=Homo sapiens OX=9606 GN=BGN PE=1 SV=1	1	7	1	1	29.8	3.4	3.4	26.744	238	238	0	4.5266	55293	66518	60686	40645	65041	36665	54949	21309	27220	63420	1210600000	4				1293	3920;14843;14844;25208;28338;42172;64709	True;False;False;False;False;False;False	4184;15892;15893;26986;30343;45752;69934	8106;8107;29245;29246;29247;49734;49735;49736;49737;49738;56921;56922;86548;86549;86550;86551;86552;86553;131729;131730;131731;131732;131733;131734	11043;11044;11045;11046;39108;39109;39110;66967;66968;66969;66970;66971;66972;66973;66974;66975;66976;66977;66978;76491;76492;116256;116257;116258;116259;116260;116261;116262;116263;176530;176531;176532;176533;176534;176535;176536	11045;39108;39109;66970;76491;116258;176534			-1				BGN
P40261	P40261	4	4	4	Nicotinamide N-methyltransferase	NNMT	sp|P40261|NNMT_HUMAN Nicotinamide N-methyltransferase OS=Homo sapiens OX=9606 GN=NNMT PE=1 SV=1	1	4	4	4	12.5	12.5	12.5	29.574	264	264	0.00016818	4.2563	72005	150180	125310	42594	229820	67009	54046	92417	94710	71870	124000000	4				3799	12683;20411;23934;54680	True;True;True;True	13602;21864;25651;59090	25055;40178;47252;110686	33503;54094;63559;147909	33503;54094;63559;147909			-1				NNMT
Q8NAT2	Q8NAT2	1	1	1	Tudor domain-containing protein 5	TDRD5	sp|Q8NAT2|TDRD5_HUMAN Tudor domain-containing protein 5 OS=Homo sapiens OX=9606 GN=TDRD5 PE=1 SV=3	1	1	1	1	1.5	1.5	1.5	109.74	981	981	1	-2	3084.1	15547	9590.3	3262.7	10415	5255.3	5190.7	5612.9	3011.9	4470.9	62193000	1	+			5695	11155	TRUE	11983	22062	29441	29441	5113;5114;5115	502;503;506	-1				TDRD5
CON__P02768-1;P02768;A0A0C4DGB6;B7WNR0;H0YA55;D6RHD5;C9JKR2;A0A087WWT3;H7C013	CON__P02768-1;P02768;A0A0C4DGB6;B7WNR0;H0YA55;D6RHD5;C9JKR2;A0A087WWT3	62;62;56;47;46;45;42;40;19	62;62;56;47;46;45;42;40;19	56;56;50;42;40;40;37;36;18	Serum albumin	ALB	;sp|P02768|ALBU_HUMAN Albumin OS=Homo sapiens OX=9606 GN=ALB PE=1 SV=2;tr|A0A0C4DGB6|A0A0C4DGB6_HUMAN Albumin OS=Homo sapiens OX=9606 GN=ALB PE=1 SV=1;tr|B7WNR0|B7WNR0_HUMAN Albumin OS=Homo sapiens OX=9606 GN=ALB PE=1 SV=1;tr|H0YA55|H0YA55_HUMAN Albumin (F	9	62	62	56	83.7	83.7	78.7	69.366	609	609;609;604;494;454;459;417;396;197	0	323.31	18387000	46274000	39558000	16183000	19640000	13973000	17357000	14093000	22454000	25782000	545350000000	763			+	1345	131;284;949;950;1485;3917;6244;6754;6763;6772;6773;8200;9818;11569;12740;13834;13835;17424;17425;17767;19510;20137;26535;26596;31965;32359;32501;32542;33257;33258;33357;35591;35592;38323;38923;39209;39310;39311;39358;40731;41705;44457;45437;45438;46914;47809;47810;49212;49213;49708;52178;52179;52859;55885;58324;59654;61096;61698;61699;63249;66404;66794	True;True;True;True;True;True;True;True;True;True;True;True;True;True;True;True;True;True;True;True;True;True;True;True;True;True;True;True;True;True;True;True;True;True;True;True;True;True;True;True;True;True;True;True;True;True;True;True;True;True;True;True;True;True;True;True;True;True;True;True;True;True	134;292;1011;1012;1583;4181;6716;6717;7260;7270;7280;7281;8782;10505;12415;12416;13662;14809;14810;18681;18682;19041;19042;20896;21578;28436;28502;34253;34676;34827;34871;35633;35634;35739;38104;38105;41003;41643;41944;42052;42053;42054;42055;42105;43952;45266;48208;49262;49263;50854;51800;51801;53283;53284;53807;56423;56424;56425;57143;60371;63014;64443;66004;66650;66651;68372;71738;72140	202;203;204;205;506;507;508;509;510;511;512;513;514;515;1891;1892;1893;1894;1895;1896;1897;1898;1899;1900;1901;1902;1903;1904;1905;1906;1907;1908;1909;1910;1911;3045;3046;3047;3048;3049;3050;3051;3052;3053;3054;3055;3056;8101;12841;12842;12843;12844;13785;13786;13787;13788;13789;13790;13791;13802;13818;13819;13820;13821;13822;13823;13824;13825;13826;16227;16228;16229;16230;16231;16232;16233;16234…	251;252;253;254;255;256;673;674;675;676;677;678;679;680;681;682;683;684;685;686;687;688;689;690;2588;2589;2590;2591;2592;2593;2594;2595;2596;2597;2598;2599;2600;2601;2602;2603;2604;2605;2606;2607;2608;2609;2610;2611;2612;2613;2614;2615;2616;2617;2618;2619;2620;2621;2622;2623;2624;2625;2626;2627;2628;4205;4206;4207;4208;4209;4210;4211;4212;4213;4214;4215;4216;4217;4218;4219;4220;4221;4222;4223;422…	253;675;2592;2616;4209;11037;17344;18581;18597;18625;18628;21698;25807;30567;33658;36284;36290;45907;45910;46789;51660;53454;71340;71467;87046;87978;88296;88429;90375;90387;90607;96893;96894;104122;105523;106176;106501;106517;106773;111463;115233;121970;124823;124835;128732;130726;130751;134376;134398;135742;142132;142133;143829;151730;158002;162221;166354;168075;168079;172634;180609;181765	971;972;973;974;975	111;147;322;353;572	-1;-1;-1;-1;-1;-1;-1;-1;-1				ALB
P54868	P54868	2	1	1	Hydroxymethylglutaryl-CoA synthase, mitochondrial	HMGCS2	sp|P54868|HMCS2_HUMAN Hydroxymethylglutaryl-CoA synthase, mitochondrial OS=Homo sapiens OX=9606 GN=HMGCS2 PE=1 SV=1	1	2	1	1	4.7	2.6	2.6	56.635	508	508	0.002724	1.7557	9668.2	11775	12893	16511	87218	12484	9689.6	10565	14758	9864.8	21638000	1				4102	34282;63913	False;True	36726;69080	69567;129997	93581;174138	93581;174138			-1				HMGCS2
CON__P35908v2;CON__P35908;P35908;CON__Q7Z794;Q7Z794	CON__P35908v2;CON__P35908;P35908	21;21;21;4;4	15;15;15;1;1	12;12;12;0;0	Keratin, type II cytoskeletal 2 epidermal	KRT2	;;sp|P35908|K22E_HUMAN Keratin, type II cytoskeletal 2 epidermal OS=Homo sapiens OX=9606 GN=KRT2 PE=1 SV=2	5	21	15	12	29.9	24.1	20.2	65.432	639	639;645;639;578;578	0	38.465	525290	175350	349330	197890	592070	183830	361320	219840	229240	280480	1719900000	20			+	1356	4968;11994;13144;18684;19626;22594;26024;27820;31122;31904;35902;37412;43970;43971;43972;53154;55518;58843;65922;65923;66577	True;True;True;True;False;True;True;False;True;False;False;True;True;True;True;True;True;True;False;False;True	5357;12869;14091;20012;21022;24200;27875;29799;33347;34188;38429;40043;47703;47704;47705;57450;59981;63562;71225;71226;71917	10252;23684;25886;36757;36758;36759;38667;44494;51694;51695;55893;62844;64671;64672;72606;72607;72608;72609;75576;90093;90094;90095;107978;112622;119416;133936;133937;135355	13892;31641;34633;49451;49452;49453;52050;52051;52052;59933;69529;69530;75068;75069;84588;86891;86892;86893;86894;97589;97590;97591;97592;97593;97594;97595;97596;97597;97598;101690;120929;120930;120931;120932;144459;150692;159925;159926;179420;179421;179422;181327	13892;31641;34633;49451;52051;59933;69529;75069;84588;86892;97596;101690;120929;120931;120932;144459;150692;159926;179421;179422;181327			-1;-1;-1;-1;-1				KRT2
P13671	P13671	9	9	9	Complement component C6	C6	sp|P13671|CO6_HUMAN Complement component C6 OS=Homo sapiens OX=9606 GN=C6 PE=1 SV=3	1	9	9	9	11.2	11.2	11.2	104.79	934	934	0	26.345	215170	372670	452670	168710	319330	256560	161030	184060	254570	218550	370900000	12				3345	3665;3745;22075;24753;27702;31478;33724;43509;44763	True;True;True;True;True;True;True;True;True	3916;3999;23645;26509;29668;33735;36130;47202;48531	7594;7746;43529;48714;55674;63715;68318;68319;89160;91430;91431	10365;10559;58670;65505;74762;85671;91676;91677;119703;119704;122660;122661	10365;10559;58670;65505;74762;85671;91677;119704;122661			-1				C6
P02743	P02743	5	5	5	Serum amyloid P-component;Serum amyloid P-component(1-203)	APCS	sp|P02743|SAMP_HUMAN Serum amyloid P-component OS=Homo sapiens OX=9606 GN=APCS PE=1 SV=2	1	5	5	5	23.8	23.8	23.8	25.387	223	223	0	37.232	167390	431120	716230	145730	762170	410170	248710	365030	190860	206060	2385500000	15				3042	6655;10332;30576;45918;61362	True;True;True;True;True	7155;11105;32770;49774;66289	13612;20452;20453;61808;61809;93856;93857;93858;93859;124708	18358;18359;27277;27278;83279;83280;83281;126063;126064;126065;126066;126067;167118;167119;167120	18359;27277;83280;126063;167119			-1				APCS
A0A087WW43;Q06033;E7ET33;CON__Q0V8M9	A0A087WW43;Q06033;E7ET33	8;8;5;1	8;8;5;1	8;8;5;1	Inter-alpha-trypsin inhibitor heavy chain H3	ITIH3	tr|A0A087WW43|A0A087WW43_HUMAN Inter-alpha-trypsin inhibitor heavy chain H3 OS=Homo sapiens OX=9606 GN=ITIH3 PE=1 SV=1;sp|Q06033|ITIH3_HUMAN Inter-alpha-trypsin inhibitor heavy chain H3 OS=Homo sapiens OX=9606 GN=ITIH3 PE=1 SV=2;tr|E7ET33|E7ET33_HUMAN Inte	4	8	8	8	16.6	16.6	16.6	75.077	670	670;890;698;891	0	35.907	184970	265590	372880	103650	377020	251570	231220	227890	208020	237840	493930000	11				98	3292;11939;14489;18175;22711;38959;52987;54920	True;True;True;True;True;True;True;True	3520;12809;15514;19480;24321;41683;57281;59347	6947;23579;28534;28535;35759;44690;78511;107732;111132	9528;9529;31493;38196;38197;48081;60177;105620;144153;148509;148510	9529;31493;38196;48081;60177;105620;144153;148510			-1;-1;-1;-1				ITIH3
Q9NZT1	Q9NZT1	2	2	2	Calmodulin-like protein 5	CALML5	sp|Q9NZT1|CALL5_HUMAN Calmodulin-like protein 5 OS=Homo sapiens OX=9606 GN=CALML5 PE=1 SV=2	1	2	2	2	9.6	9.6	9.6	15.892	146	146	0.00045788	2.6767	3529.3	3623.7	4273.9	9013.7	20140	3843.9	14199	3069.1	19053	10055	15490000	2				6957	2247;2248	True;True	2405;2406	4782;4783	6638;6639	6638;6639			-1				CALML5
Q9NZD4;H3BSK6	Q9NZD4	4;1	4;1	4;1	Alpha-hemoglobin-stabilizing protein	AHSP	sp|Q9NZD4|AHSP_HUMAN Alpha-hemoglobin-stabilizing protein OS=Homo sapiens OX=9606 GN=AHSP PE=1 SV=1	2	4	4	4	32.4	32.4	32.4	11.84	102	102;57	0	13.004	96675	67791	136760	75771	156260	95224	102140	68082	161490	69480	231080000	7				6939	9879;45388;47480;47481	True;True;True;True	10570;49209;51457;51458	19447;92839;96874;96875;96876	25929;25930;25931;124733;130032;130033;130034	25930;124733;130032;130033			-1;-1				AHSP
P50225;P0DMN0;P0DMM9;H3BRY5;A0A0A6YYL2;P50226;E9PKW4;H3BQX5	P50225;P0DMN0;P0DMM9;H3BRY5;A0A0A6YYL2;P50226	8;6;6;5;5;4;3;2	8;6;6;5;5;4;3;2	8;6;6;5;5;4;3;2	Sulfotransferase 1A1;Sulfotransferase 1A4;Sulfotransferase 1A3;Sulfotransferase;Sulfotransferase 1A2	SULT1A1;SULT1A4;SULT1A3;SULT1A2	sp|P50225|ST1A1_HUMAN Sulfotransferase 1A1 OS=Homo sapiens OX=9606 GN=SULT1A1 PE=1 SV=3;sp|P0DMN0|ST1A4_HUMAN Sulfotransferase 1A4 OS=Homo sapiens OX=9606 GN=SULT1A4 PE=1 SV=1;sp|P0DMM9|ST1A3_HUMAN Sulfotransferase 1A3 OS=Homo sapiens OX=9606 GN=SULT1A3 PE	8	8	8	8	26.1	26.1	26.1	34.165	295	295;295;295;281;301;295;262;169	0	23.948	492500	399450	435290	205360	298500	367340	225350	287130	571880	658370	1577300000	13				3978	4395;18765;28814;39763;57016;59021;59022;61668	True;True;True;True;True;True;True;True	4752;4753;20097;30846;42542;61587;63754;63755;66617	9188;9189;36960;58209;80088;115561;119738;119739;119740;125380;125381	12489;12490;49768;78451;78452;107803;154625;160333;160334;160335;160336;167971;167972	12490;49768;78452;107803;154625;160333;160335;167971	3675	93	-1;-1;-1;-1;-1;-1;-1;-1				SULT1A1;SULT1A4;SULT1A3;SULT1A2
P05997	P05997	1	1	1	Collagen alpha-2(V) chain	COL5A2	sp|P05997|CO5A2_HUMAN Collagen alpha-2(V) chain OS=Homo sapiens OX=9606 GN=COL5A2 PE=1 SV=3	1	1	1	1	0.6	0.6	0.6	144.91	1499	1499	0.00075792	2.5723	7444.5	17907	19923	12745	21155	10960	9907	4622.7	10784	14340	33903000	1				3126	23931	TRUE	25648	47247	63553	63553			-1				COL5A2
P00747;Q5TEH5;A6PVI2;CON__P06868;Q15195	P00747	18;3;3;1;1	18;3;3;1;1	18;3;3;1;1	Plasminogen;Plasmin heavy chain A;Activation peptide;Angiostatin;Plasmin heavy chain A, short form;Plasmin light chain B	PLG	sp|P00747|PLMN_HUMAN Plasminogen OS=Homo sapiens OX=9606 GN=PLG PE=1 SV=2	5	18	18	18	26.2	26.2	26.2	90.568	810	810;136;166;812;96	0	77.41	422900	887430	980100	426390	513060	414740	367730	326020	662620	509580	1207100000	28				2989	6871;12569;24926;25040;26766;34449;38363;39526;40910;42529;43076;43083;43089;43090;46452;58150;61865;65959	True;True;True;True;True;True;True;True;True;True;True;True;True;True;True;True;True;True	7387;13483;26691;26810;28684;36897;41046;42281;44226;46130;46736;46743;46749;46750;50330;62830;66829;71264	14002;14003;24840;24841;49063;49306;53850;69818;69819;77433;77434;79638;83633;87221;88352;88372;88381;88382;94927;117790;125870;134034	18842;18843;33217;33218;65981;65982;66322;66323;72405;93909;93910;93911;104199;104200;104201;107185;112473;117118;118586;118612;118613;118623;118624;127504;127505;157539;168676;179577	18843;33218;65981;66323;72405;93910;104200;107185;112473;117118;118586;118613;118623;118624;127505;157539;168676;179577			-1;-1;-1;-1;-1				PLG
O15522;O95096	O15522;O95096	1;1	1;1	1;1	Homeobox protein Nkx-2.8;Homeobox protein Nkx-2.2	NKX2-8;NKX2-2	sp|O15522|NKX28_HUMAN Homeobox protein Nkx-2.8 OS=Homo sapiens OX=9606 GN=NKX2-8 PE=2 SV=2;sp|O95096|NKX22_HUMAN Homeobox protein Nkx-2.2 OS=Homo sapiens OX=9606 GN=NKX2-2 PE=2 SV=1	2	1	1	1	2.9	2.9	2.9	25.866	239	239;273	0.0085095	1.2026	46247	107620	55318	19509	39276	40913	8341.2	58505	142290	34949	1051700000	2				2553	38766	TRUE	41477	78168	105174;105175	105175			-1;-1				NKX2-8;NKX2-2
H7BYV1;E9PS44;E9PQN9;P13164;Q01629;Q01628	H7BYV1;E9PS44;E9PQN9;P13164;Q01629;Q01628	1;1;1;1;1;1	1;1;1;1;1;1	1;1;1;1;1;1	Interferon-induced transmembrane protein 1;Interferon-induced transmembrane protein 2;Interferon-induced transmembrane protein 3	IFITM2;IFITM3;IFITM1	tr|H7BYV1|H7BYV1_HUMAN Interferon-induced transmembrane protein 2 (Fragment) OS=Homo sapiens OX=9606 GN=IFITM2 PE=3 SV=1;tr|E9PS44|E9PS44_HUMAN Interferon-induced transmembrane protein 3 OS=Homo sapiens OX=9606 GN=IFITM3 PE=1 SV=1;tr|E9PQN9|E9PQN9_HUMAN In	6	1	1	1	21.6	21.6	21.6	8.0866	74	74;112;112;125;132;133	0	26.613	78688	163220	85201	44050	257950	102470	97728	109750	80023	72124	186420000	6				1683	41133	TRUE	44580;44581	84349;84350;84351;84352;84353	113386;113387;113388;113389;113390;113391	113386	1227	17	-1;-1;-1;-1;-1;-1				IFITM2;IFITM3;IFITM1
P01008;Q8TCE1;CON__P41361	P01008	20;9;4	20;9;4	20;9;4	Antithrombin-III	SERPINC1	sp|P01008|ANT3_HUMAN Antithrombin-III OS=Homo sapiens OX=9606 GN=SERPINC1 PE=1 SV=1	3	20	20	20	34.5	34.5	34.5	52.602	464	464;259;465	0	97.181	539680	1156900	1348000	580350	835810	466250	473820	406320	722280	734280	4885400000	40				2996	1016;5593;5594;9394;16082;18704;18892;20231;20381;21394;27667;30941;30942;37593;37594;50332;52555;52556;59863;60050	True;True;True;True;True;True;True;True;True;True;True;True;True;True;True;True;True;True;True;True	1085;1086;1087;6026;6027;10057;17261;20034;20234;21675;21833;22916;29632;33157;33158;40237;40238;54472;56822;56823;64672;64883	2046;2047;2048;2049;11573;11574;11575;11576;18566;18567;31795;31796;36844;36845;36846;37216;39835;39836;39837;40140;42174;55619;62459;62460;75903;75904;75905;102810;106931;106932;106933;121598;122022	2821;2822;2823;2824;15612;15613;15614;15615;15616;15617;24809;24810;42626;42627;42628;42629;42630;49613;49614;49615;49616;50100;53630;53631;53632;53633;54042;56813;74691;84111;84112;102103;102104;102105;137571;143101;143102;143103;162843;163437	2822;15612;15615;24809;42628;49615;50100;53631;54042;56813;74691;84111;84112;102103;102104;137571;143101;143103;162843;163437	2145;2146	283;284	-1;-1;-1				SERPINC1
Q6P163;K7ER74;P02655;V9GYJ8	Q6P163;K7ER74;P02655	3;3;3;1	3;3;3;1	3;3;3;1	Apolipoprotein C-II;Proapolipoprotein C-II	APOC2;APOC4-APOC2	tr|Q6P163|Q6P163_HUMAN Apolipoprotein C-II OS=Homo sapiens OX=9606 GN=APOC2 PE=1 SV=1;tr|K7ER74|K7ER74_HUMAN Apolipoprotein C-II OS=Homo sapiens OX=9606 GN=APOC4-APOC2 PE=1 SV=1;sp|P02655|APOC2_HUMAN Apolipoprotein C-II OS=Homo sapiens OX=9606 GN=APOC2 PE=	4	3	3	3	40.3	40.3	40.3	8.1463	72	72;178;101;87	0	5.5649	43192	147730	146300	48707	70045	45046	42714	56262	92534	120590	469960000	4				2330	17208;55529;59699	True;True;True	18444;59992;64492	33782;112634;121255	45324;45325;150708;162397	45325;150708;162397			-1;-1;-1;-1				APOC2;APOC4-APOC2
REV__J3QLF9;REV__Q8NCQ5	REV__J3QLF9;REV__Q8NCQ5	1;1	1;1	1;1			tr|J3QLF9|J3QLF9_HUMAN F-box only protein 15 (Fragment) OS=Homo sapiens OX=9606 GN=FBXO15 PE=1 SV=8;sp|Q8NCQ5|FBX15_HUMAN F-box only protein 15 OS=Homo sapiens OX=9606 GN=FBXO15 PE=2 SV=2	2	1	1	1	0	0	0	15.199	136	136;510	1	-2	16581	20874	21302	14276	32267	20096	14994	11513	18190	15506	8898100	1	+	+		7503	13055	TRUE	13997	25727	34424	34424	6147;6148	33;35	-1;-1
F8VVI9;J3KTP3;Q9H159	F8VVI9;J3KTP3;Q9H159	2;2;2	2;2;2	2;2;2	Cadherin-19	CDH19	tr|F8VVI9|F8VVI9_HUMAN Cadherin-19 (Fragment) OS=Homo sapiens OX=9606 GN=CDH19 PE=1 SV=1;tr|J3KTP3|J3KTP3_HUMAN Cadherin-19 OS=Homo sapiens OX=9606 GN=CDH19 PE=1 SV=1;sp|Q9H159|CAD19_HUMAN Cadherin-19 OS=Homo sapiens OX=9606 GN=CDH19 PE=2 SV=1	3	2	2	2	4.6	4.6	4.6	48.84	434	434;541;772	0	5.7833	23910	49478	45639	23953	53926	35380	32716	24160	27661	33584	51633000	2				1806	4951;63730	True;True	5339;68881	10212;129662	13839;173723	13839;173723			-1;-1;-1				CDH19
H0YAC1;P03952;E9PBC5;C9JCT1;C9J075	H0YAC1;P03952;E9PBC5	8;8;6;2;2	8;8;6;2;2	8;8;6;2;2	Plasma kallikrein;Plasma kallikrein heavy chain;Plasma kallikrein light chain	KLKB1	tr|H0YAC1|H0YAC1_HUMAN Plasma kallikrein (Fragment) OS=Homo sapiens OX=9606 GN=KLKB1 PE=1 SV=1;sp|P03952|KLKB1_HUMAN Plasma kallikrein OS=Homo sapiens OX=9606 GN=KLKB1 PE=1 SV=1;tr|E9PBC5|E9PBC5_HUMAN Plasma kallikrein OS=Homo sapiens OX=9606 GN=KLKB1 PE=1	5	8	8	8	12.2	12.2	12.2	76.773	686	686;638;514;141;148	0	17.19	224130	423580	490970	191480	226220	170480	223040	165080	228010	244970	978470000	8				1984	11214;11368;14705;27367;39084;59902;63965;67278	True;True;True;True;True;True;True;True	12043;12205;15748;29322;41813;64713;69135;72663	22163;22541;28992;55131;78725;121677;130080;136630	29578;30131;38778;74049;105885;162947;174255;183038	29578;30131;38778;74049;105885;162947;174255;183038			-1;-1;-1;-1;-1				KLKB1
Q5VSJ8;E7EU00;F6XSS0;P18577	Q5VSJ8;E7EU00;F6XSS0;P18577	1;1;1;1	1;1;1;1	1;1;1;1	Blood group Rh(CE) polypeptide	RHCE	tr|Q5VSJ8|Q5VSJ8_HUMAN Blood group Rh(CE) polypeptide OS=Homo sapiens OX=9606 GN=RHCE PE=1 SV=1;tr|E7EU00|E7EU00_HUMAN Blood group Rh(CE) polypeptide OS=Homo sapiens OX=9606 GN=RHCE PE=1 SV=3;tr|F6XSS0|F6XSS0_HUMAN Blood group Rh(CE) polypeptide OS=Homo sa	4	1	1	1	2.3	2.3	2.3	38.589	354	354;372;401;417	0.0014728	2.2042	15454	16286	22607	14530	39404	21461	16649	13594	24481	17713	91310000	3				1531	24884	TRUE	26649	48965;48966;48967	65832;65833;65834	65834			-1;-1;-1;-1				RHCE
Q6DD87	Q6DD87	1	1	1	Zinc finger protein 787	ZNF787	sp|Q6DD87|ZN787_HUMAN Zinc finger protein 787 OS=Homo sapiens OX=9606 GN=ZNF787 PE=1 SV=4	1	1	1	1	4.2	4.2	4.2	40.428	382	382	0	6.5295	2642.8	3465.2	2724.5	2011.2	2022.3	2886.6	2313.6	1399.1	2856.5	6908.1	7526100	2				5165	2288	TRUE	2448	4873;4874	6759;6760	6759			-1				ZNF787
CON__Q04695;Q04695;F5GWP8;K7EPJ9	CON__Q04695;Q04695;F5GWP8;K7EPJ9	12;12;10;7	2;2;1;2	1;1;1;1	Keratin, type I cytoskeletal 17	KRT17	;sp|Q04695|K1C17_HUMAN Keratin, type I cytoskeletal 17 OS=Homo sapiens OX=9606 GN=KRT17 PE=1 SV=2;tr|F5GWP8|F5GWP8_HUMAN Keratin, type I cytoskeletal 17 OS=Homo sapiens OX=9606 GN=KRT17 PE=1 SV=2;tr|K7EPJ9|K7EPJ9_HUMAN Keratin, type I cytoskeletal 17 (Frag	4	12	2	1	23.1	4.6	1.9	48.105	432	432;432;349;231	0.00016231	3.6163	60038	67720	124010	81472	262840	69360	191850	69680	62286	69904	79866000	3			+	1357	3328;17828;29808;32584;33110;34147;42156;51395;56245;57105;58608;62192	True;False;False;False;False;False;False;False;False;True;False;False	3559;19106;31933;34914;35475;36579;45734;55589;60759;61684;63316;67190	7008;34992;34993;60256;60257;65993;67085;69195;86503;86504;86505;104868;114051;115787;118977;118978;126593	9617;9618;46982;46983;81248;81249;88516;89971;92981;116201;116202;116203;140400;152631;154934;159342;159343;159344;169649	9617;46983;81248;88516;89971;92981;116202;140400;152631;154934;159343;169649	967	226	-1;-1;-1;-1				KRT17
I3L1D5;O15296	I3L1D5;O15296	2;2	2;2	2;2	Arachidonate 15-lipoxygenase B	ALOX15B	tr|I3L1D5|I3L1D5_HUMAN Polyunsaturated fatty acid lipoxygenase ALOX15B OS=Homo sapiens OX=9606 GN=ALOX15B PE=1 SV=1;sp|O15296|LX15B_HUMAN Polyunsaturated fatty acid lipoxygenase ALOX15B OS=Homo sapiens OX=9606 GN=ALOX15B PE=1 SV=3	2	2	2	2	4.5	4.5	4.5	74.486	664	664;676	0	7.1877	25161	84624	30926	21185	48861	25527	34072	32232	45854	33618	37294000	2				2174	22033;22228	True;True	23601;23812	43435;43843	58544;59087	58544;59087			-1;-1				ALOX15B
P07942;G3XAI2;E7EPA6	P07942;G3XAI2	37;37;12	37;37;12	37;37;12	Laminin subunit beta-1	LAMB1	sp|P07942|LAMB1_HUMAN Laminin subunit beta-1 OS=Homo sapiens OX=9606 GN=LAMB1 PE=1 SV=2;tr|G3XAI2|G3XAI2_HUMAN Laminin subunit beta-1 OS=Homo sapiens OX=9606 GN=LAMB1 PE=1 SV=1	3	37	37	37	20.5	20.5	20.5	198.04	1786	1786;1810;850	0	239.28	1011600	3298000	2502700	1429100	2020000	1526100	1568700	960170	1251600	1593500	11464000000	70				1907	603;1686;1687;3295;6992;7005;9343;10861;11764;12412;15205;17729;21055;27687;29510;29998;32431;35207;35806;36855;37776;41487;42255;47586;47587;56251;56653;57434;57435;57436;57601;60907;64038;66010;67200;67581;67710	True;True;True;True;True;True;True;True;True;True;True;True;True;True;True;True;True;True;True;True;True;True;True;True;True;True;True;True;True;True;True;True;True;True;True;True;True	637;1801;1802;1803;1804;3523;7515;7530;10001;11663;12623;13315;16277;19002;22554;29653;31621;32145;34753;37696;38332;39463;40430;45035;45839;51569;51570;60765;61194;62046;62047;62048;62222;65799;69209;71320;72579;72986;73122	1125;1126;3430;3431;3432;3433;3434;3435;3436;3437;3438;6950;14174;14199;18456;21492;23247;24543;24544;30017;34776;34777;41545;55647;59699;60670;65686;65687;71277;71278;72435;74407;76209;76210;76211;85367;85368;86719;86720;97093;97094;114061;114841;116458;116459;116460;116461;116749;123770;130195;130196;134138;136506;136507;137181;137406	1483;1484;4717;4718;4719;4720;4721;4722;4723;4724;4725;4726;9532;9533;19055;19056;19086;24659;28695;31064;32846;32847;40185;46649;46650;46651;46652;46653;46654;55983;74725;74726;80439;80440;81789;88128;88129;95807;95808;95809;97361;99975;102494;102495;102496;114719;114720;116497;116498;130303;130304;152646;153694;153695;155818;155819;155820;155821;156181;165842;165843;174418;174419;179720;182886;…	1483;4722;4724;9533;19055;19086;24659;28695;31064;32846;40185;46652;55983;74725;80440;81789;88129;95809;97361;99975;102495;114720;116497;130303;130304;152646;153695;155818;155819;155821;156181;165843;174418;179720;182887;183729;184018	1350;1351;1352	1263;1573;1721	-1;-1;-1				LAMB1
A0A087WVM2;Q8N6Q3	A0A087WVM2;Q8N6Q3	1;1	1;1	1;1	CD177 antigen	CD177	tr|A0A087WVM2|A0A087WVM2_HUMAN CD177 antigen OS=Homo sapiens OX=9606 GN=CD177 PE=1 SV=1;sp|Q8N6Q3|CD177_HUMAN CD177 antigen OS=Homo sapiens OX=9606 GN=CD177 PE=1 SV=2	2	1	1	1	2.7	2.7	2.7	46.381	437	437;437	0	8.5844	15495	72534	246940	56375	51961	54110	21602	35499	43262	30708	29533000	1				87	21346	TRUE	22862	42074	56689	56689			-1;-1				CD177
REV__Q3MIX3	REV__Q3MIX3	1	1	1			sp|Q3MIX3|ADCK5_HUMAN Uncharacterized aarF domain-containing protein kinase 5 OS=Homo sapiens OX=9606 GN=ADCK5 PE=1 SV=3	1	1	1	1	0	0	0	65.827	580	580	1	-2	32024	89459	36605	12833	24796	22136	10427	38239	65391	31549	399730000	2	+	+		7524	36485	TRUE	39028	73618;73619	98951;98952	98951	6160	29	-1
CON__P02769	CON__P02769	17	11	11				1	17	11	11	24.9	18.5	18.5	69.293	607	607	0	19.523	186100	188400	244610	181850	180780	181420	211850	68411	175280	2521800	592980000	12			+	1346	5603;6772;6773;8244;9816;26402;32501;35684;39208;39358;45439;46913;47808;55886;63249;66403;66794	True;False;False;True;True;True;False;True;True;False;True;True;True;True;False;True;False	6036;7280;7281;8826;10503;28276;34827;38201;41943;42105;49264;50853;51799;60372;68372;71737;72140	11593;13818;13819;13820;13821;13822;13823;13824;13825;13826;16322;19346;52700;65811;65812;65813;65814;65815;65816;65817;65818;65819;65820;65821;65822;65823;65824;65825;65826;65827;65828;65829;65830;65831;65832;72212;72213;78949;79333;79334;79335;79336;79337;79338;79339;79340;79341;79342;79343;79344;79345;79346;79347;79348;92924;95879;97420;113371;128809;128810;128811;134844;135700;135701;135702;1…	15643;18617;18618;18619;18620;18621;18622;18623;18624;18625;18626;18627;18628;18629;21824;25801;70887;88267;88268;88269;88270;88271;88272;88273;88274;88275;88276;88277;88278;88279;88280;88281;88282;88283;88284;88285;88286;88287;88288;88289;88290;88291;88292;88293;88294;88295;88296;88297;88298;88299;88300;88301;88302;88303;88304;88305;88306;88307;88308;97089;97090;106174;106766;106767;106768;10676…	15643;18625;18628;21824;25801;70887;88296;97089;106174;106773;124838;128728;130719;151739;172634;180605;181765			-1
Q6NUN0	Q6NUN0	9	9	9	Acyl-coenzyme A synthetase ACSM5, mitochondrial	ACSM5	sp|Q6NUN0|ACSM5_HUMAN Acyl-coenzyme A synthetase ACSM5, mitochondrial OS=Homo sapiens OX=9606 GN=ACSM5 PE=1 SV=2	1	9	9	9	16.9	16.9	16.9	64.759	579	579	0	33.831	281440	385010	202940	152070	249670	208410	224030	187360	298960	213400	364730000	11				5202	517;15684;41550;52393;55532;59913;60324;61879;67071	True;True;True;True;True;True;True;True;True	548;16779;45101;56651;59995;64724;65173;66843;72445	968;30891;85475;106643;112638;121700;122599;125908;136249;136250	1288;41392;114856;142701;150712;162982;164266;168731;168732;182557;182558	1288;41392;114856;142701;150712;162982;164266;168731;182558			-1				ACSM5
REV__Q9H195	REV__Q9H195	1	1	1			sp|Q9H195|MUC3B_HUMAN Mucin-3B (Fragments) OS=Homo sapiens OX=9606 GN=MUC3B PE=2 SV=2	1	1	1	1	0	0	0	131.4	1237	1237	1	-2	37104	131730	140110	30044	94029	77508	84435	86121	60893	62988	1214100000	1	+	+		7552	62861	TRUE	67944	127947	171463	171463	6170	15	-1
F5GY80;F5H7G1;P07358	F5GY80;F5H7G1;P07358	6;6;6	6;6;6	6;6;6	Complement component C8 beta chain	C8B	tr|F5GY80|F5GY80_HUMAN Complement component 8 subunit beta OS=Homo sapiens OX=9606 GN=C8B PE=1 SV=1;tr|F5H7G1|F5H7G1_HUMAN Complement component 8 subunit beta OS=Homo sapiens OX=9606 GN=C8B PE=1 SV=1;sp|P07358|CO8B_HUMAN Complement component C8 beta chain	3	6	6	6	14	14	14	60.04	529	529;539;591	0	17.389	109500	233800	292760	85445	138250	129030	102090	124070	121010	150790	380710000	8				1720	6781;6889;21698;22921;44601;44781	True;True;True;True;True;True	7289;7405;23240;24543;48361;48549	13835;14031;42743;42744;45135;91128;91129;91462	18639;18871;57601;57602;60764;122266;122267;122700	18639;18871;57602;60764;122267;122700			-1;-1;-1				C8B
A0A0A0MRP3;O00325;F8WAJ7;A0A0B4J204;P43115	A0A0A0MRP3;O00325;F8WAJ7;A0A0B4J204;P43115	1;1;1;1;1	1;1;1;1;1	1;1;1;1;1	Prostaglandin E2 receptor EP3 subtype	PTGER3	tr|A0A0A0MRP3|A0A0A0MRP3_HUMAN Prostaglandin E2 receptor EP3 subtype OS=Homo sapiens OX=9606 GN=PTGER3 PE=1 SV=1;tr|O00325|O00325_HUMAN Prostaglandin E2 receptor EP3 subtype OS=Homo sapiens OX=9606 GN=PTGER3 PE=1 SV=1;tr|F8WAJ7|F8WAJ7_HUMAN Prostaglandin E	5	1	1	1	3.4	3.4	3.4	42.859	388	388;402;412;425;390	1	-2	41611	49780	57308	34513	98138	64093	43796	41997	56474	32498	1757900000	3	+			282	36700	TRUE	39301;39302	74163;74164;74165	99675;99676;99677	99675	221	24	-1;-1;-1;-1;-1				PTGER3
P02042;E9PFT6;E9PEW8;C9JRG0	P02042;E9PFT6;E9PEW8	14;10;9;3	6;4;4;1	6;4;4;1	Hemoglobin subunit delta	HBD	sp|P02042|HBD_HUMAN Hemoglobin subunit delta OS=Homo sapiens OX=9606 GN=HBD PE=1 SV=2;tr|E9PFT6|E9PFT6_HUMAN Hemoglobin subunit delta OS=Homo sapiens OX=9606 GN=HBD PE=1 SV=1;tr|E9PEW8|E9PEW8_HUMAN Hemoglobin subunit delta (Fragment) OS=Homo sapiens OX=960	4	14	6	6	87.8	47.6	47.6	16.055	147	147;141;104;85	0	160.56	1724400	2504100	2161300	1797500	4596700	3005100	1952100	1623800	2372200	1744800	53988000000	79				3025	13905;19096;24919;32484;35214;36464;41139;41917;55808;61654;62335;63063;64421;64422	True;True;True;False;False;False;False;True;True;False;False;True;False;False	14884;14885;20450;20451;26684;34810;37703;39005;44591;44592;44593;45486;60293;66602;66603;67340;68171;69622;69623	27281;27282;27283;27284;27285;27286;27287;27288;27289;27290;27291;27292;27293;27294;27295;27296;27297;27298;27299;27300;27301;27302;27303;27304;27305;27306;27307;27308;27309;37600;37601;37602;37603;49045;49046;49047;49048;49049;49050;65787;65788;71293;71294;71295;71296;71297;71298;71299;71300;71301;71302;71303;71304;71305;71306;71307;71308;71309;71310;71311;71312;71313;71314;71315;71316;71317;713…	36533;36534;36535;36536;36537;36538;36539;36540;36541;36542;36543;36544;36545;36546;36547;36548;36549;36550;36551;36552;36553;36554;36555;36556;36557;36558;36559;36560;36561;36562;36563;36564;36565;36566;36567;36568;36569;36570;36571;36572;36573;36574;36575;36576;36577;50606;50607;50608;50609;65959;65960;65961;65962;65963;65964;88241;88242;95829;95830;95831;95832;95833;95834;95835;95836;95837;958…	36575;50609;65961;88242;95876;98913;113412;115708;151592;167895;169978;172044;175465;175510	2164;2165;2166	1;56;127	-1;-1;-1;-1				HBD
C9J6F5;B5MD45;Q6UXI7	C9J6F5;B5MD45;Q6UXI7	2;2;2	2;2;2	2;2;2	Vitrin	VIT	tr|C9J6F5|C9J6F5_HUMAN Vitrin OS=Homo sapiens OX=9606 GN=VIT PE=1 SV=1;tr|B5MD45|B5MD45_HUMAN Vitrin OS=Homo sapiens OX=9606 GN=VIT PE=1 SV=1;sp|Q6UXI7|VITRN_HUMAN Vitrin OS=Homo sapiens OX=9606 GN=VIT PE=2 SV=1	3	2	2	2	5.5	5.5	5.5	38.666	347	347;630;678	0.0014784	2.2586	18991	51042	64521	27317	45575	24013	21491	21420	34876	34424	49052000	2				1154	57717;67300	True;True	62349;72686	116969;136665	156485;183088	156485;183088			-1;-1;-1				VIT
A0A669KBF1;Q9BXM0	A0A669KBF1;Q9BXM0	74;74	74;74	74;74	Periaxin	PRX	tr|A0A669KBF1|A0A669KBF1_HUMAN Periaxin OS=Homo sapiens OX=9606 GN=PRX PE=1 SV=1;sp|Q9BXM0|PRAX_HUMAN Periaxin OS=Homo sapiens OX=9606 GN=PRX PE=1 SV=2	2	74	74	74	49.7	49.7	49.7	164.79	1556	1556;1461	0	323.31	2938000	10813000	8033000	6855400	10621000	5709300	4608500	2084900	4999800	7580300	101980000000	322				922	1284;1509;1746;1831;3100;3108;4367;5072;11274;12266;12547;13074;13947;13948;15746;17787;18624;19244;20462;21734;22017;23094;24153;24207;24416;25472;29445;32572;32573;34056;35674;35675;36252;36719;36720;36972;36975;36976;36977;36987;37118;37123;40750;40789;40795;40800;44194;44326;48466;50196;50487;52083;53089;59471;59472;60652;60811;61026;61127;61272;61372;61373;61382;61431;63117;63127;63130;63131…	True;True;True;True;True;True;True;True;True;True;True;True;True;True;True;True;True;True;True;True;True;True;True;True;True;True;True;True;True;True;True;True;True;True;True;True;True;True;True;True;True;True;True;True;True;True;True;True;True;True;True;True;True;True;True;True;True;True;True;True;True;True;True;True;True;True;True;True;True;True;True;True;True;True	1376;1606;1607;1872;1873;1965;3317;3325;4723;5465;12106;13160;13460;14020;14932;14933;16845;19062;19947;20612;21915;23279;23585;24731;25877;25933;26155;27275;31549;34902;34903;36480;38190;38191;38790;39322;39323;39581;39584;39585;39586;39596;39736;39741;43981;43982;44034;44043;44044;44051;47940;48075;52491;54324;54632;56319;57384;64241;64242;65526;65697;65926;66035;66193;66299;66300;66301;66302;6…	2624;2625;3093;3094;3095;3096;3097;3098;3791;3792;3793;3794;3795;3796;3797;3949;6516;6517;6539;9105;10505;22309;22310;24266;24267;24268;24269;24270;24271;24801;24802;24803;25767;25768;27395;27396;27397;27398;31018;31019;31020;31021;34904;34905;34906;34907;34908;34909;34910;34911;34912;34913;34914;34915;34916;34917;34918;34919;34920;34921;36634;36635;36636;37924;40349;40350;40351;40352;40353;42818…	3609;3610;3611;4273;4274;4275;4276;4277;4278;4279;4280;5346;5347;5348;5349;5350;5351;5352;5353;5548;5549;8908;8909;8940;12359;12360;14215;29786;29787;32468;32469;32470;32471;32472;32473;32474;32475;32476;32477;33166;33167;33168;33169;34477;34478;36682;36683;36684;36685;36686;36687;36688;41568;41569;41570;41571;41572;46837;46838;46839;46840;46841;46842;46843;46844;46845;46846;46847;46848;46849;468…	3609;4279;5346;5549;8909;8940;12359;14215;29787;32475;33167;34477;36686;36688;41570;46846;49286;51044;54399;57697;58497;61200;64071;64198;64707;67741;80275;88494;88496;92768;97070;97073;98483;99724;99728;100268;100278;100281;100286;100311;100601;100612;111533;111890;111928;111947;121414;121703;132445;137091;137969;141877;144340;161736;161741;165169;165592;166149;166461;166816;167141;167145;167163…	737;738;739;740;741;742;743;744;745	517;579;649;706;765;768;890;1216;1438	-1;-1				PRX
REV__O75934	REV__O75934	1	1	1			sp|O75934|SPF27_HUMAN Pre-mRNA-splicing factor SPF27 OS=Homo sapiens OX=9606 GN=BCAS2 PE=1 SV=1	1	1	1	1	0	0	0	26.131	225	225	1	-2	1432200	1733100	1924200	1245700	3163800	2002100	1541600	1328100	1934800	1197100	15235000000	54	+	+		7510	38128	TRUE	40793;40794	76981;76982;76983;76984;76985;76986;76987;76988;76989;76990;76991;76992;76993;76994;76995;76996;76997;76998;76999;77000;77001;77002;77003;77004;77005;77006;77007;77008;77009;77010;77011	103566;103567;103568;103569;103570;103571;103572;103573;103574;103575;103576;103577;103578;103579;103580;103581;103582;103583;103584;103585;103586;103587;103588;103589;103590;103591;103592;103593;103594;103595;103596;103597;103598;103599;103600;103601;103602;103603;103604;103605;103606;103607;103608;103609;103610;103611;103612;103613;103614;103615;103616;103617;103618;103619	103567	6152	56	-1
REV__E7EQH1;REV__Q8NFJ9	REV__E7EQH1;REV__Q8NFJ9	2;2	2;2	2;2			tr|E7EQH1|E7EQH1_HUMAN Bardet-Biedl syndrome 1 protein OS=Homo sapiens OX=9606 GN=BBS1 PE=1 SV=1;sp|Q8NFJ9|BBS1_HUMAN Bardet-Biedl syndrome 1 protein OS=Homo sapiens OX=9606 GN=BBS1 PE=1 SV=1	2	2	2	2	0	0	0	54.112	496	496;593	0.0095511	1.133	66303	91422	94734	107060	224180	164520	277910	77955	66929	76409	773690000	4		+		7476	15840;28543	True;True	16941;30562	31183;31184;57678	41784;41785;41786;77753	41786;77753			-1;-1
P27169;F8WF42	P27169	5;1	5;1	5;1	Serum paraoxonase/arylesterase 1	PON1	sp|P27169|PON1_HUMAN Serum paraoxonase/arylesterase 1 OS=Homo sapiens OX=9606 GN=PON1 PE=1 SV=3	2	5	5	5	13.8	13.8	13.8	39.731	355	355;77	0	11.364	105040	158780	191260	87447	129810	88949	103390	89661	165520	116350	406240000	6				3616	18148;29680;36070;51754;54956	True;True;True;True;True	19452;31798;38603;55970;59385	35709;60040;72940;105457;111187	48016;80957;80958;98065;141160;148580	48016;80958;98065;141160;148580			-1;-1				PON1
CON__P12763	CON__P12763	6	4	4				1	6	4	4	17.5	12	12	38.418	359	359	0	9.1575	91732	112630	112460	92720	93113	104700	98014	44696	118580	1431200	438690000	6			+	1352	6842;7252;18244;26858;45065;58184	False;False;True;True;True;True	7355;7786;19554;28781;48856;62865	13939;14570;14571;35887;54054;54055;92102;117854	18765;19536;19537;48243;72663;72664;72665;123615;157630	18765;19536;48243;72665;123615;157630			-1
P00738;J3QR68;H0Y300;A0A0C4DGL8;J3QLC9;A0A087WU08;H3BS21;J3KTC3;J3KRH2;J3KSV1;J3QQI8;H3BMJ7	P00738;J3QR68;H0Y300;A0A0C4DGL8;J3QLC9;A0A087WU08	28;26;26;24;22;16;12;8;8;2;2;2	28;26;26;24;22;16;12;8;8;2;2;2	12;10;10;8;12;8;7;0;4;2;2;2	Haptoglobin;Haptoglobin alpha chain;Haptoglobin beta chain	HP	sp|P00738|HPT_HUMAN Haptoglobin OS=Homo sapiens OX=9606 GN=HP PE=1 SV=1;tr|J3QR68|J3QR68_HUMAN Haptoglobin (Fragment) OS=Homo sapiens OX=9606 GN=HP PE=1 SV=1;tr|H0Y300|H0Y300_HUMAN Haptoglobin OS=Homo sapiens OX=9606 GN=HP PE=1 SV=4;tr|A0A0C4DGL8|A0A0C4DGL	12	28	28	12	56.9	56.9	32.8	45.205	406	406;404;442;347;365;281;222;117;149;88;91;92	0	323.31	2223200	4491700	5838900	2032700	8128600	4262400	3483300	3987200	3547200	2288100	71292000000	159				2985	6091;6092;6093;9226;9227;11861;24565;27039;27040;28858;32320;36928;36929;37961;37962;37963;43065;46800;50806;53741;56279;56280;56281;61587;62843;64305;64634;67542	True;True;True;True;True;True;True;True;True;True;True;True;True;True;True;True;True;True;True;True;True;True;True;True;True;True;True;True	6555;6556;6557;9876;9877;12726;26313;28976;28977;30891;34636;39537;39538;40621;40622;40623;46725;50697;54969;58102;58103;60795;60796;60797;66530;67918;67919;69497;69854;72942;72943	12504;12505;12506;12507;12508;12509;12510;12511;12512;18215;18216;18217;18218;18219;23400;48366;48367;48368;48369;48370;54493;54494;54495;54496;54497;54498;54499;54500;54501;54502;54503;58294;58295;58296;58297;58298;65481;65482;74555;74556;74557;74558;74559;76651;76652;76653;76654;76655;76656;76657;76658;76659;76660;76661;76662;76663;88333;88334;88335;95549;95550;95551;103778;103779;109099;109100…	16873;16874;16875;16876;16877;16878;16879;16880;16881;16882;16883;16884;16885;16886;16887;16888;16889;24330;24331;24332;24333;24334;31267;31268;65038;65039;65040;65041;65042;65043;65044;65045;73221;73222;73223;73224;73225;73226;73227;73228;73229;73230;73231;73232;73233;73234;73235;73236;78571;78572;78573;78574;78575;78576;78577;87897;87898;100180;100181;100182;100183;100184;100185;100186;103118;1…	16874;16881;16886;24332;24333;31267;65038;73226;73233;78574;87898;100180;100183;103118;103121;103126;118559;128325;138935;145887;152704;152709;152712;167677;171416;175063;176300;183632	2138;2139;2140	263;300;343	-1;-1;-1;-1;-1;-1;-1;-1;-1;-1;-1;-1				HP
Q5M9N0	Q5M9N0	1	1	1	Coiled-coil domain-containing protein 158	CCDC158	sp|Q5M9N0|CD158_HUMAN Coiled-coil domain-containing protein 158 OS=Homo sapiens OX=9606 GN=CCDC158 PE=2 SV=2	1	1	1	1	0.9	0.9	0.9	127.14	1113	1113	0.00982	1.1198	61172	61979	64794	33748	54008	37615	44350	35082	41533	71159	54882000	1				5010	64260	TRUE	69451	130605	174951	174951	4863	809	-1				CCDC158
P04114;A8MUN2;A0A669KB70;CON__ENSEMBL:ENSBTAP00000032840	P04114	97;20;3;1	97;20;3;1	97;20;3;1	Apolipoprotein B-100;Apolipoprotein B-48	APOB	sp|P04114|APOB_HUMAN Apolipoprotein B-100 OS=Homo sapiens OX=9606 GN=APOB PE=1 SV=2	4	97	97	97	22.4	22.4	22.4	515.6	4563	4563;828;135;825	0	323.31	3335100	4788200	5960400	2434200	4542100	3015700	1860600	2653800	3501000	4064200	6973400000	136				3073	371;2334;3898;3988;4760;5231;5677;5843;7585;8478;8685;11218;12565;13867;14801;16128;16603;17042;17268;17573;17984;18287;19429;20217;20722;21284;23845;23846;25249;26189;26198;26209;27672;27759;28257;28308;29325;29332;30246;30320;30618;32874;32937;33112;33383;33635;34448;35210;36148;36680;37162;37706;37903;38233;38248;38658;39074;41088;41889;42276;42756;42879;42932;43160;43709;45387;45954;46028;476…	True;True;True;True;True;True;True;True;True;True;True;True;True;True;True;True;True;True;True;True;True;True;True;True;True;True;True;True;True;True;True;True;True;True;True;True;True;True;True;True;True;True;True;True;True;True;True;True;True;True;True;True;True;True;True;True;True;True;True;True;True;True;True;True;True;True;True;True;True;True;True;True;True;True;True;True;True;True;True;True…	381;2495;4160;4255;5138;5636;6119;6294;8132;8133;9074;9299;12047;13479;14843;15848;17310;17811;18269;18509;18839;19276;19597;20812;21660;22197;22798;25562;25563;27033;28049;28058;28069;29637;29734;30258;30311;31420;31428;32421;32500;32814;35222;35289;35477;35766;36035;36896;37699;38684;39281;39780;40356;40563;40906;40923;41358;41801;44504;45456;45862;46376;46512;46584;46826;47417;49208;49812;4989…	658;4975;8054;8229;9864;10856;11733;12039;15088;15089;16703;17110;22170;24836;27191;29167;31872;31873;32701;33503;33884;34467;34468;34469;35416;35959;38253;39802;40871;41982;41983;47101;47102;49841;49842;52154;52155;52156;52173;52174;52187;55627;55792;56794;56871;59335;59348;61148;61149;61315;61870;66609;66737;67094;67613;68085;69817;71282;71283;73095;74129;74935;76084;76546;77208;77231;77232;779…	873;6912;10966;10967;11211;13374;14697;15820;15821;16227;20176;20177;22302;22303;22843;29585;33212;33213;36349;38999;42736;42737;43885;44954;45457;46246;46247;46248;47633;48341;48342;51475;53589;55075;56572;56573;63377;63378;67131;67132;70082;70083;70084;70107;70108;70109;70125;74704;74928;76341;76342;76432;79965;79982;82376;82377;82618;83356;89363;89538;89539;89983;89984;90656;91275;93907;93908;…	873;6912;10967;11211;13374;14697;15820;16227;20176;22302;22843;29585;33212;36349;38999;42736;43885;44954;45457;46248;47633;48342;51475;53589;55075;56572;63377;63378;67131;70082;70107;70125;74704;74928;76342;76432;79965;79982;82376;82618;83356;89363;89539;89984;90656;91275;93908;95814;98260;99634;100692;102325;102986;103890;103922;104939;105851;113166;115637;116545;117769;118038;118269;118751;1202…	2232;2233;2234;2235;2236	278;522;1189;3421;3458	-1;-1;-1;-1				APOB
O00748;J3QSC0	O00748;J3QSC0	2;1	2;1	2;1	Cocaine esterase	CES2	sp|O00748|EST2_HUMAN Cocaine esterase OS=Homo sapiens OX=9606 GN=CES2 PE=1 SV=1;tr|J3QSC0|J3QSC0_HUMAN Cocaine esterase (Fragment) OS=Homo sapiens OX=9606 GN=CES2 PE=1 SV=1	2	2	2	2	3.6	3.6	3.6	61.806	559	559;201	0	4.7744	12181	12039	10760	7134.9	14260	6881.6	6492.4	6779.1	11218	13180	23964000	3				2441	20496;29591	True;True	21951;31703	40417;59870	54476;80743;80744	54476;80743			-1;-1				CES2
A2RU48	A2RU48	2	2	2	Single-pass membrane and coiled-coil domain-containing protein 3	SMCO3	sp|A2RU48|SMCO3_HUMAN Single-pass membrane and coiled-coil domain-containing protein 3 OS=Homo sapiens OX=9606 GN=SMCO3 PE=1 SV=1	1	2	2	2	7.1	7.1	7.1	24.877	225	225	0.0025829	1.7711	20290	56756	47818	26771	43751	29236	21953	21953	38679	35649	27869000	2				956	2905;58451	True;True	3105;63147	6151;118548	8427;158782	8427;158782			-1				SMCO3
CON__Q3SX09	CON__Q3SX09	5	3	2				1	5	3	2	25.9	16.4	10.9	22.06	201	201	0	5.1335	46046	73485	60513	37621	86039	58401	38227	50629	105020	76098	258820000	4			+	1359	789;20965;35214;36464;60395	True;True;False;False;True	840;22458;37703;39005;65248	1591;41369;71293;71294;71295;71296;71297;71298;71299;71300;71301;71302;71303;71304;71305;71306;71307;71308;71309;71310;71311;71312;71313;71314;71315;71316;71317;71318;71319;71320;71321;71322;71323;71324;71325;71326;71327;73582;73583;73584;73585;73586;73587;73588;122710	2174;55743;95829;95830;95831;95832;95833;95834;95835;95836;95837;95838;95839;95840;95841;95842;95843;95844;95845;95846;95847;95848;95849;95850;95851;95852;95853;95854;95855;95856;95857;95858;95859;95860;95861;95862;95863;95864;95865;95866;95867;95868;95869;95870;95871;95872;95873;95874;95875;95876;95877;95878;95879;95880;95881;95882;95883;95884;95885;95886;95887;95888;95889;95890;95891;95892;9589…	2174;55743;95876;98913;164409			-1
H3BSS0	H3BSS0	1	1	1	Metallothionein	MT1G	tr|H3BSS0|H3BSS0_HUMAN Metallothionein OS=Homo sapiens OX=9606 GN=MT1G PE=1 SV=1	1	1	1	1	29.4	29.4	29.4	7.0793	68	68	0	5.5132	3958.1	5804.8	4392.7	3061.4	9178	7319.3	3254.3	4927.6	8404.7	4098.9	16529000	2				2099	39949	TRUE	42820;42821	80750;80751	108737;108738	108737	1465	1	-1				MT1G
P10643;CON__Q29RQ1	P10643	13;2	13;2	12;2	Complement component C7	C7	sp|P10643|CO7_HUMAN Complement component C7 OS=Homo sapiens OX=9606 GN=C7 PE=1 SV=2	2	13	13	12	20.6	20.6	19.8	93.517	843	843;843	0	30.825	265110	351740	446430	170170	299260	256890	315400	255150	308880	252270	522560000	17				3275	855;8843;10915;15299;15785;21338;38755;40808;46915;49823;51712;53138;62333	True;True;True;True;True;True;True;True;True;True;True;True;True	908;9467;11721;16375;16884;22854;41466;44060;50855;53930;55925;57434;67338	1714;17472;21604;30191;31084;42062;78154;83216;95885;101657;105387;107961;126831	2357;23360;28853;28854;40414;41655;56673;56674;56675;105157;111964;128735;136079;136080;141073;144438;169962	2357;23360;28853;40414;41655;56675;105157;111964;128735;136080;141073;144438;169962	2557	588	-1;-1				C7
Q9H3G5;H7C0X5;H7C218;C9J6L4;C9JI22;C9JLV0	Q9H3G5;H7C0X5;H7C218	6;4;3;1;1;1	6;4;3;1;1;1	6;4;3;1;1;1	Probable serine carboxypeptidase CPVL	CPVL	sp|Q9H3G5|CPVL_HUMAN Probable serine carboxypeptidase CPVL OS=Homo sapiens OX=9606 GN=CPVL PE=1 SV=2;tr|H7C0X5|H7C0X5_HUMAN Probable serine carboxypeptidase CPVL (Fragment) OS=Homo sapiens OX=9606 GN=CPVL PE=1 SV=1;tr|H7C218|H7C218_HUMAN Probable serine ca	6	6	6	6	14.3	14.3	14.3	54.163	476	476;180;141;100;141;244	0	21.487	192670	289310	179930	154760	170390	173450	214840	120970	225290	241640	512060000	11				6601	7484;19767;22437;42942;44724;51119	True;True;True;True;True;True	8027;21168;24032;46595;48490;55300	14940;38894;38895;44203;44204;88115;91362;91363;104373	20000;20001;52358;52359;59552;59553;118287;118288;122574;122575;139724	20000;52359;59553;118288;122574;139724			-1;-1;-1;-1;-1;-1				CPVL
REV__Q9P217	REV__Q9P217	1	1	1			sp|Q9P217|ZSWM5_HUMAN Zinc finger SWIM domain-containing protein 5 OS=Homo sapiens OX=9606 GN=ZSWIM5 PE=2 SV=2	1	1	1	1	0	0	0	130.63	1185	1185	1	-2	20000	23831	20971	29642	67730	23399	33381	11184	24604	28547	267230000	2	+	+		7557	15055	TRUE	16118	29740	39805;39806	39806	6174	822	-1
Q15848	Q15848	1	1	1	Adiponectin	ADIPOQ	sp|Q15848|ADIPO_HUMAN Adiponectin OS=Homo sapiens OX=9606 GN=ADIPOQ PE=1 SV=1	1	1	1	1	6.1	6.1	6.1	26.413	244	244	0.00016289	3.6588	12957	25224	23292	9030.6	12993	10483	15639	12981	14510	14092	42912000	1				4843	28101	TRUE	30092	56448	75847	75847			-1				ADIPOQ
A0A087X1D0;H0YE23;P25942	A0A087X1D0;H0YE23;P25942	1;1;1	1;1;1	1;1;1	Tumor necrosis factor receptor superfamily member 5	CD40	tr|A0A087X1D0|A0A087X1D0_HUMAN CD40 antigen (TNF receptor superfamily member 5), isoform CRA_c OS=Homo sapiens OX=9606 GN=CD40 PE=1 SV=1;tr|H0YE23|H0YE23_HUMAN Tumor necrosis factor receptor superfamily member 5 (Fragment) OS=Homo sapiens OX=9606 GN=CD40 P	3	1	1	1	6	6	6	17.035	151	151;159;277	0.0080011	1.2658	11905	11709	11607	3828	9174.2	12539	10611	11526	12688	12392	18718000	1				204	50865	TRUE	55032	103883	139070	139070			-1;-1;-1				CD40
P02647;F8W696	P02647;F8W696	24;21	24;21	24;21	Apolipoprotein A-I;Proapolipoprotein A-I;Truncated apolipoprotein A-I	APOA1	sp|P02647|APOA1_HUMAN Apolipoprotein A-I OS=Homo sapiens OX=9606 GN=APOA1 PE=1 SV=1;tr|F8W696|F8W696_HUMAN Apolipoprotein A-I OS=Homo sapiens OX=9606 GN=APOA1 PE=1 SV=1	2	24	24	24	65.9	65.9	65.9	30.777	267	267;245	0	156.11	1670800	4095400	4518000	1723900	1856600	1083800	1597800	1642700	2765400	2519700	40603000000	104				3032	1656;2713;3114;5609;9666;9751;11012;12034;17462;32528;32786;33697;35090;37857;38273;38274;44216;46250;56989;56990;60933;63514;63515;65416	True;True;True;True;True;True;True;True;True;True;True;True;True;True;True;True;True;True;True;True;True;True;True;True	1761;2898;3332;6043;10346;10436;11825;12913;18720;18721;34856;34857;35132;36100;37567;40514;40951;40952;40953;40954;47962;50120;61551;61552;65825;68653;68654;70682;70683	3361;5753;5754;5755;6551;6552;11604;19110;19249;21752;21753;21754;21755;23767;23768;23769;23770;34255;34256;34257;34258;65891;65892;65893;65894;65895;65896;66459;66460;66461;66462;66463;68265;68266;68267;71039;71040;71041;71042;76375;76376;77268;77269;77270;77271;77272;77273;90514;90515;94522;115454;115455;115456;115457;115458;123812;123813;123814;129282;129283;129284;129285;129286;129287;129288;…	4623;4624;7904;7905;7906;8954;8955;8956;15656;25504;25676;29038;29039;29040;29041;29042;29043;29044;31768;31769;31770;31771;31772;31773;31774;45977;45978;45979;45980;45981;88395;88396;88397;88398;88399;88400;88401;88402;89181;89182;89183;89184;89185;89186;91603;91604;91605;91606;91607;95527;95528;95529;95530;95531;95532;95533;95534;102687;102688;103962;103963;103964;103965;103966;103967;103968;10…	4623;7904;8955;15656;25504;25676;29043;31773;45980;88399;89182;91604;95534;102688;103963;103965;121479;126922;154494;154498;165905;173249;173261;178216	2183;2184;2185	110;136;172	-1;-1				APOA1
Q14116	Q14116	2	2	2	Interleukin-18	IL18	sp|Q14116|IL18_HUMAN Interleukin-18 OS=Homo sapiens OX=9606 GN=IL18 PE=1 SV=1	1	2	2	2	8.3	8.3	8.3	22.326	193	193	0.0066547	1.3475	35776	39348	35739	16407	29062	23099	25189	26718	36419	27600	82538000	2				4661	31199;50997	True;True	33434;55169	63072;104133	84882;139413	84882;139413			-1				IL18
P02749;J3KS17;J3QRN2;J3QLI0	P02749	5;1;1;1	5;1;1;1	5;1;1;1	Beta-2-glycoprotein 1	APOH	sp|P02749|APOH_HUMAN Beta-2-glycoprotein 1 OS=Homo sapiens OX=9606 GN=APOH PE=1 SV=3	4	5	5	5	20.9	20.9	20.9	38.298	345	345;104;181;200	0	48.426	134720	260850	220590	118070	189540	134320	152840	126040	173630	99119	482600000	6				3046	5880;7284;7470;42083;56700	True;True;True;True;True	6333;7818;8013;45659;61245	12110;14622;14623;14920;86395;114965	16326;19602;19603;19974;116068;153857	16326;19602;19974;116068;153857	2206	290	-1;-1;-1;-1				APOH
E7END6;P04070	E7END6;P04070	1;1	1;1	1;1	Vitamin K-dependent protein C;Vitamin K-dependent protein C light chain;Vitamin K-dependent protein C heavy chain;Activation peptide	PROC	tr|E7END6|E7END6_HUMAN Vitamin K-dependent protein C OS=Homo sapiens OX=9606 GN=PROC PE=1 SV=1;sp|P04070|PROC_HUMAN Vitamin K-dependent protein C OS=Homo sapiens OX=9606 GN=PROC PE=1 SV=1	2	1	1	1	2.4	2.4	2.4	55.389	495	495;461	0.00015423	2.8831	10494	16426	10293	8174.8	4212.8	4778.2	4254.8	4373.9	14541	14581	14511000	2				1478	11277	TRUE	12109	22314;22315	29791;29792	29791			-1;-1				PROC
Q13474;F2Z3K8	Q13474	9;2	8;2	8;2	Dystrophin-related protein 2	DRP2	sp|Q13474|DRP2_HUMAN Dystrophin-related protein 2 OS=Homo sapiens OX=9606 GN=DRP2 PE=2 SV=2	2	9	8	8	13.6	12.6	12.6	107.96	957	957;353	0	61.201	87621	245490	212010	146270	205980	134780	110210	71222	129940	173830	601090000	9				4600	8570;17531;24378;28743;35229;40856;46461;46653;65422	True;True;True;True;True;False;True;True;True	9172;18793;26117;30771;37719;44140;44141;50339;50542;70689	16906;34366;48046;48047;58070;71354;83420;83421;83422;83423;83424;94941;95236;133043	22591;46114;64637;64638;78272;95931;112221;112222;112223;112224;112225;112226;127519;127886;178226	22591;46114;64637;78272;95931;112226;127519;127886;178226	715	853	-1;-1				DRP2
Q07507	Q07507	2	2	2	Dermatopontin	DPT	sp|Q07507|DERM_HUMAN Dermatopontin OS=Homo sapiens OX=9606 GN=DPT PE=1 SV=2	1	2	2	2	13.9	13.9	13.9	24.005	201	201	0	21.414	73542	205360	182110	73932	149060	87675	87801	99498	111940	165600	985760000	7				4459	21221;45769	True;True	22732;49610	41879;41880;93538	56437;56438;56439;56440;56441;125634;125635	56440;125635			-1				DPT
CON__P13647;P13647;H0YI76;F8VV57;F8VU69	CON__P13647;P13647	14;14;3;2;2	3;3;1;2;2	1;1;1;0;0	Keratin, type II cytoskeletal 5	KRT5	;sp|P13647|K2C5_HUMAN Keratin, type II cytoskeletal 5 OS=Homo sapiens OX=9606 GN=KRT5 PE=1 SV=3	5	14	3	1	16.8	5.9	1.7	62.378	590	590;590;201;132;147	0	20.772	28672	30296	49007	32404	114630	28853	53146	34207	39925	29648	38110000	3			+	1354	18684;19624;31119;31904;32733;35902;42491;46336;51793;51938;63646;65501;65922;65923	False;False;False;False;True;False;False;False;True;True;False;False;False;False	20012;21020;33343;33344;34188;35068;38429;46090;50210;56009;56160;68792;70772;71225;71226	36757;36758;36759;38610;38611;38612;38613;38614;38615;38616;38617;38618;38619;38620;38621;38622;38623;38624;38625;38626;38627;38628;38629;38630;38631;38632;38633;38634;38635;38636;38637;38638;38639;38640;38641;38642;38643;38644;38645;38646;38647;38648;38649;38650;38651;38652;38653;38654;38655;38656;38657;38658;38659;38660;38661;38662;38663;38664;38665;62831;62832;62833;62834;62835;64671;64672;662…	49451;49452;49453;51933;51934;51935;51936;51937;51938;51939;51940;51941;51942;51943;51944;51945;51946;51947;51948;51949;51950;51951;51952;51953;51954;51955;51956;51957;51958;51959;51960;51961;51962;51963;51964;51965;51966;51967;51968;51969;51970;51971;51972;51973;51974;51975;51976;51977;51978;51979;51980;51981;51982;51983;51984;51985;51986;51987;51988;51989;51990;51991;51992;51993;51994;51995;519…	49451;51977;84575;86892;88970;97596;117041;127130;141243;141567;173542;178371;179421;179422	970	284	-1;-1;-1;-1;-1				KRT5
A0A2R8Y7X9;P69891;P69892;E9PBW4;A0A0J9YYA3;P02100	A0A2R8Y7X9;P69891;P69892	9;9;8;3;2;2	8;8;7;3;2;1	7;7;6;2;2;0	Hemoglobin subunit gamma-1;Hemoglobin subunit gamma-2	HBG1;HBG2	tr|A0A2R8Y7X9|A0A2R8Y7X9_HUMAN GLOBIN domain-containing protein OS=Homo sapiens OX=9606 PE=3 SV=1;sp|P69891|HBG1_HUMAN Hemoglobin subunit gamma-1 OS=Homo sapiens OX=9606 GN=HBG1 PE=1 SV=2;sp|P69892|HBG2_HUMAN Hemoglobin subunit gamma-2 OS=Homo sapiens OX=9	6	9	8	7	60.7	54.8	49.4	18.42	168	168;147;147;92;30;147	0	55.547	228280	2430500	288050	937070	1270900	982980	467500	239320	406640	416000	9245300000	26				700	5709;13903;19088;22707;35213;36464;41202;62706;63067	True;True;True;True;True;False;True;True;True	6152;14882;20442;24317;37702;39005;44693;44694;67740;68175	11791;11792;27252;37579;44685;44686;71289;71290;71291;71292;73582;73583;73584;73585;73586;73587;73588;84706;84707;84708;127589;127590;128442;128443;128444	15899;15900;15901;36426;36427;36428;50578;60172;60173;95825;95826;95827;95828;98907;98908;98909;98910;98911;98912;98913;98914;98915;98916;98917;113900;113901;113902;113903;170986;170987;170988;170989;172127;172128;172129;172130;172131	15900;36428;50578;60172;95826;98913;113903;170987;172128	585;586	56;155	-1;-1;-1;-1;-1;-1				HBG1;HBG2
P68871;A0A2R8Y7R2;F8W6P5;A0A0J9YWK4	P68871;A0A2R8Y7R2;F8W6P5	17;13;10;4	17;13;10;4	9;7;5;2	Hemoglobin subunit beta;LVV-hemorphin-7;Spinorphin	HBB	sp|P68871|HBB_HUMAN Hemoglobin subunit beta OS=Homo sapiens OX=9606 GN=HBB PE=1 SV=2;tr|A0A2R8Y7R2|A0A2R8Y7R2_HUMAN Hemoglobin subunit beta OS=Homo sapiens OX=9606 GN=HBB PE=1 SV=1;tr|F8W6P5|F8W6P5_HUMAN Hemoglobin subunit beta (Fragment) OS=Homo sapiens O	4	17	17	9	95.9	95.9	67.3	15.998	147	147;111;90;55	0	323.31	15091000	18778000	20171000	12795000	32816000	22237000	16491000	15413000	19773000	12880000	703460000000	678				4299	13904;19097;24906;24907;32484;35214;36018;36464;41139;50776;50777;61654;61655;62335;63064;64421;64422	True;True;True;True;True;True;True;True;True;True;True;True;True;True;True;True;True	14883;20452;20453;26671;26672;34810;37703;38547;39005;44591;44592;44593;54936;54937;66602;66603;66604;67340;68172;69622;69623	27253;27254;27255;27256;27257;27258;27259;27260;27261;27262;27263;27264;27265;27266;27267;27268;27269;27270;27271;27272;27273;27274;27275;27276;27277;27278;27279;27280;37604;37605;37606;37607;37608;37609;37610;37611;37612;37613;37614;37615;37616;37617;37618;37619;37620;37621;37622;37623;37624;37625;37626;37627;37628;37629;37630;37631;37632;37633;37634;37635;37636;37637;49001;49002;49003;49004;490…	36429;36430;36431;36432;36433;36434;36435;36436;36437;36438;36439;36440;36441;36442;36443;36444;36445;36446;36447;36448;36449;36450;36451;36452;36453;36454;36455;36456;36457;36458;36459;36460;36461;36462;36463;36464;36465;36466;36467;36468;36469;36470;36471;36472;36473;36474;36475;36476;36477;36478;36479;36480;36481;36482;36483;36484;36485;36486;36487;36488;36489;36490;36491;36492;36493;36494;364…	36505;50654;65931;65936;88242;95876;97953;98913;113412;138639;138712;167895;167942;169978;172074;175465;175510	2166;4086	1;56	-1;-1;-1;-1				HBB
P01031;CON__Q1A7A4	P01031	27;2	27;2	27;2	Complement C5;Complement C5 beta chain;Complement C5 alpha chain;C5a anaphylatoxin;Complement C5 alpha chain	C5	sp|P01031|CO5_HUMAN Complement C5 OS=Homo sapiens OX=9606 GN=C5 PE=1 SV=4	2	27	27	27	16.1	16.1	16.1	188.3	1676	1676;1677	0	69.998	509970	1059700	1124800	479040	845110	701000	511170	581110	705350	735850	1053500000	30				3002	2101;5725;9385;11179;15815;16269;17382;20143;21062;25098;25569;27615;28532;41314;41907;47803;48922;52518;55901;56745;57627;58891;60263;62369;65018;65353;66527	True;True;True;True;True;True;True;True;True;True;True;True;True;True;True;True;True;True;True;True;True;True;True;True;True;True;True	2246;6169;10048;12008;16915;17462;18636;21584;22562;26872;27384;29579;30551;44846;45474;51794;52971;56782;60389;61292;62249;63611;65109;67378;70259;70614;71865	4423;11855;18555;22096;31132;32097;34104;39701;41559;41560;49436;50493;55536;57659;85049;86099;97415;99687;106845;113394;115036;116790;116791;119510;122482;126949;132327;132924;135081	6174;16002;24796;29487;41716;43028;45767;53466;53467;55999;56000;66509;67983;74577;77733;114325;115681;130713;133622;142989;151768;153954;156242;156243;160047;164096;170133;177300;178064;180922	6174;16002;24796;29487;41716;43028;45767;53467;55999;66509;67983;74577;77733;114325;115681;130713;133622;142989;151768;153954;156242;160047;164096;170133;177300;178064;180922			-1;-1				C5
P02748;CON__Q3MHN2	P02748	12;1	12;1	12;1	Complement component C9;Complement component C9a;Complement component C9b	C9	sp|P02748|CO9_HUMAN Complement component C9 OS=Homo sapiens OX=9606 GN=C9 PE=1 SV=2	2	12	12	12	21.3	21.3	21.3	63.173	559	559;548	0	32.695	270900	567650	754270	227240	534920	417400	328300	409550	401770	350890	1925400000	17				3045	3711;7246;10774;10871;11809;20554;21899;38272;43410;52344;56310;64506	True;True;True;True;True;True;True;True;True;True;True;True	3963;7780;11575;11673;12670;22013;23454;40950;47098;56599;60827;69715	7676;14563;21317;21515;23330;40501;43164;77267;88978;106566;106567;114167;114168;131292;131293	10460;10461;19527;19528;28444;28721;31176;54578;58181;103961;119458;142611;142612;152777;152778;175939;175940	10461;19528;28444;28721;31176;54578;58181;103961;119458;142611;152778;175939			-1;-1				C9
D6RF35;P02774;D6RBJ7;D6RF20;CON__Q3MHN5;CON__ENSEMBL:ENSBTAP00000018229	D6RF35;P02774;D6RBJ7	22;22;12;6;3;3	21;21;11;5;3;3	21;21;11;5;3;3	Vitamin D-binding protein	GC	tr|D6RF35|D6RF35_HUMAN Gc-globulin OS=Homo sapiens OX=9606 GN=GC PE=1 SV=1;sp|P02774|VTDB_HUMAN Vitamin D-binding protein OS=Homo sapiens OX=9606 GN=GC PE=1 SV=2;tr|D6RBJ7|D6RBJ7_HUMAN Gc-globulin OS=Homo sapiens OX=9606 GN=GC PE=1 SV=1	6	22	21	21	48.5	47.1	47.1	53.02	476	476;474;348;145;474;475	0	246.83	566460	1138800	1304500	629720	1036100	656270	698670	542730	627490	734210	4951500000	33				1414	3111;6760;11501;13882;15627;15805;18269;18928;24210;26673;31389;31583;33225;36911;50162;50826;52807;56993;58636;60312;62281;67373	True;True;True;True;True;True;True;True;True;True;True;True;True;True;True;True;True;True;False;True;True;True	3329;7266;7267;12343;14858;16720;16904;19579;20273;25936;28588;33634;33853;35599;39519;54287;54990;57089;61555;63345;65160;67285;72763	6547;13798;13799;22752;27216;30781;30782;30783;31116;35930;35931;35932;37293;47720;47721;53520;63486;63971;67345;74515;102389;103816;107399;115461;115462;115463;119026;119027;122574;126752;136800	8948;18593;18594;30413;36378;41225;41226;41227;41228;41697;48304;48305;48306;50202;64203;64204;71929;71930;85401;85980;90320;100120;137001;138985;143704;154502;154503;154504;159398;159399;159400;164228;169857;169858;169859;183254	8948;18593;30413;36378;41226;41697;48304;50202;64204;71930;85401;85980;90320;100120;137001;138985;143704;154503;159400;164228;169857;183254	1008	274	-1;-1;-1;-1;-1;-1				GC
P01042	P01042	20	20	20	Kininogen-1;Kininogen-1 heavy chain;T-kinin;Bradykinin;Lysyl-bradykinin;Kininogen-1 light chain;Low molecular weight growth-promoting factor	KNG1	sp|P01042|KNG1_HUMAN Kininogen-1 OS=Homo sapiens OX=9606 GN=KNG1 PE=1 SV=2	1	20	20	20	29.2	29.2	29.2	71.957	644	644	0	55.283	532020	787290	1155000	440110	736070	470680	444530	482110	604270	666720	1887800000	31				3004	691;5963;5964;8733;13986;17223;17224;22714;26501;27305;27421;33312;48243;49199;59363;59609;63595;65974;66112;66911	True;True;True;True;True;True;True;True;True;True;True;True;True;True;True;True;True;True;True;True	736;6421;6422;9350;14973;18462;18463;24324;28395;29256;29378;35694;52259;53268;64123;64392;68737;71280;71427;72279	1351;12254;12255;12256;17187;27459;33813;33814;44694;52986;52987;55018;55211;67497;98319;100268;120548;121051;129421;129422;134070;134314;135924	1847;1848;16506;16507;16508;16509;22942;22943;36767;36768;45366;45367;60181;71228;71229;73896;74153;74154;90504;131936;134340;161470;161471;162122;173422;173423;173424;179628;179953;182051;182052	1848;16506;16509;22943;36767;45366;45367;60181;71229;73896;74154;90504;131936;134340;161471;162122;173423;179628;179953;182052			-1				KNG1
P09467;A0A3B3IUC7;Q5VZC3	P09467;A0A3B3IUC7;Q5VZC3	10;7;5	10;7;5	9;7;5	Fructose-1,6-bisphosphatase 1	FBP1	sp|P09467|F16P1_HUMAN Fructose-1,6-bisphosphatase 1 OS=Homo sapiens OX=9606 GN=FBP1 PE=1 SV=5;tr|A0A3B3IUC7|A0A3B3IUC7_HUMAN Fructose-bisphosphatase OS=Homo sapiens OX=9606 GN=FBP1 PE=1 SV=1;tr|Q5VZC3|Q5VZC3_HUMAN Fructose-bisphosphatase (Fragment) OS=Homo	3	10	10	9	30.5	30.5	28.4	36.842	338	338;273;151	0	30.379	219030	317820	281760	186980	544990	211820	181710	211390	284320	226600	832880000	15				3224	1157;2309;2340;3018;8575;12696;25711;25712;54708;54709	True;True;True;True;True;True;True;True;True;True	1238;2469;2501;3229;9177;13615;27535;27536;59120;59121	2390;4936;4985;6372;16914;16915;25079;25080;50788;50789;50790;50791;110733;110734	3293;6861;6922;8723;22599;22600;33541;33542;33543;68351;68352;68353;68354;147971;147972	3293;6861;6922;8723;22600;33542;68352;68353;147971;147972	2497	295	-1;-1;-1				FBP1
B0YIW2;P02656	B0YIW2;P02656	4;4	4;4	4;4	Apolipoprotein C-III	APOC3	tr|B0YIW2|B0YIW2_HUMAN Apolipoprotein C-III OS=Homo sapiens OX=9606 GN=APOC3 PE=1 SV=1;sp|P02656|APOC3_HUMAN Apolipoprotein C-III OS=Homo sapiens OX=9606 GN=APOC3 PE=1 SV=1	2	4	4	4	30.8	30.8	30.8	12.815	117	117;99	0	155.62	145010	611380	411990	194440	274890	164030	157500	223440	373860	496250	1176200000	10				1051	7836;12037;12038;25496	True;True;True;True	8401;12916;12917;27303	15584;15585;23773;23774;23775;50371;50372	20832;20833;20834;20835;31778;31779;31780;31781;67827;67828	20833;31779;31781;67828			-1;-1				APOC3
P01024;CON__Q2UVX4;M0QYC8;M0QXZ3;M0R0Q9;M0R1Q1;O95568	P01024	76;9;7;3;3;1;1	76;9;7;3;3;1;1	76;9;7;3;3;1;1	Complement C3;Complement C3 beta chain;C3-beta-c;Complement C3 alpha chain;C3a anaphylatoxin;Acylation stimulating protein;Complement C3b alpha chain;Complement C3c alpha chain fragment 1;Complement C3dg fragment;Complement C3g fragment;Complement C3d fragment;Complement C3f fragment;Complement C3c alpha chain fragment 2	C3	sp|P01024|CO3_HUMAN Complement C3 OS=Homo sapiens OX=9606 GN=C3 PE=1 SV=2	7	76	76	76	47.3	47.3	47.3	187.15	1663	1663;1662;192;100;101;103;372	0	323.31	3797000	8269900	8563200	3806800	7478800	5364300	3878900	4562700	5382700	5499300	45285000000	231				3001	793;848;1058;1384;2215;4522;5251;6241;6700;6759;7861;8573;9236;10916;11458;12943;16119;19477;19478;20802;20845;23245;24249;25210;25653;26681;27772;28079;28942;29460;29461;30028;30704;32297;33241;34202;34203;37160;38947;39180;41846;43446;43711;44449;45400;45720;45721;46254;46299;47112;47132;49278;49932;51323;52067;52068;52076;53372;55188;55474;56361;56813;57325;59439;61173;61684;62448;63287;63680;…	True;True;True;True;True;True;True;True;True;True;True;True;True;True;True;True;True;True;True;True;True;True;True;True;True;True;True;True;True;True;True;True;True;True;True;True;True;True;True;True;True;True;True;True;True;True;True;True;True;True;True;True;True;True;True;True;True;True;True;True;True;True;True;True;True;True;True;True;True;True;True;True;True;True;True;True	844;901;1133;1478;2370;2371;4888;5656;6713;7204;7265;8430;9175;9887;11722;12299;13874;17300;20861;20862;22280;22325;24887;25979;25980;26988;27473;28596;29747;30069;30980;31566;31567;32177;32908;34608;35617;36641;36642;36643;36644;39778;41671;41913;45411;47136;47419;48200;49221;49560;49561;50124;50125;50172;51060;51081;51082;53352;54045;55514;56302;56303;56304;56312;57716;59630;59931;59932;60879;6…	1602;1706;2130;2833;2834;4724;4725;4726;4727;9415;10895;10896;10897;12837;13697;13698;13797;15637;15638;15639;15640;16909;16910;16911;18233;18234;21605;22675;25509;25510;25511;25512;25513;25514;25515;31852;38332;38333;41017;41018;41019;41020;41021;41077;41078;45770;47786;47787;47788;49740;49741;49742;49743;49744;50679;50680;50681;53534;53535;53536;55809;55810;55811;55812;56413;56414;56415;56416;5…	2189;2347;2348;2921;2922;3915;3916;3917;6573;6574;6575;6576;6577;12778;14747;14748;14749;17339;18468;18469;18470;18592;20905;20906;20907;20908;20909;20910;22594;22595;22596;24352;24353;24354;24355;28855;30310;34124;34125;34126;34127;34128;34129;34130;34131;34132;34133;34134;34135;34136;34137;42698;51573;51574;55273;55274;55275;55276;55277;55278;55346;55347;55348;61585;61586;64284;64285;64286;6698…	2189;2348;2922;3915;6577;12778;14748;17339;18468;18592;20906;22595;24355;28855;30310;34137;42698;51573;51574;55276;55346;61586;64286;66981;68222;71948;74955;75803;78757;80311;80314;81840;83562;87825;90345;93215;93218;100689;105606;106112;115530;119589;120217;121960;124753;125539;125541;126941;127067;129119;129148;134567;136314;140194;141840;141846;141862;145027;149180;150025;152890;154068;155491;…	2151;2152;2153;2154;2155;2156;2157;2158	42;164;495;581;1129;1181;1199;1347	-1;-1;-1;-1;-1;-1;-1				C3
P05543;CON__Q9TT36	P05543	3;1	3;1	3;1	Thyroxine-binding globulin	SERPINA7	sp|P05543|THBG_HUMAN Thyroxine-binding globulin OS=Homo sapiens OX=9606 GN=SERPINA7 PE=1 SV=2	2	3	3	3	6.3	6.3	6.3	46.324	415	415;411	0	4.691	40048	78849	74666	38739	56554	44301	37798	36945	53978	47086	110640000	3				3120	6205;52403;56194	True;True;True	6676;56661;60706	12730;106658;113967	17188;142719;152525	17188;142719;152525			-1;-1				SERPINA7
A0A6E1W127;A7E2Y1	A0A6E1W127;A7E2Y1	2;2	1;1	1;1	Myosin-7B	MYH7B	tr|A0A6E1W127|A0A6E1W127_HUMAN Myosin-7B OS=Homo sapiens OX=9606 GN=MYH7B PE=1 SV=1;sp|A7E2Y1|MYH7B_HUMAN Myosin-7B OS=Homo sapiens OX=9606 GN=MYH7B PE=1 SV=4	2	2	1	1	0.9	0.6	0.6	221.39	1941	1941;1983	0.0045153	1.5401	4478.8	5165.9	5714	21822	6651.2	6213.8	6539.5	7323.6	5997.4	5515.9	13268000	1				927	13540;31877	True;False	14506;34161	26654;64634	35669;86850	35669;86850			-1;-1				MYH7B
G3V511;G3V3X5;Q14767	G3V511;G3V3X5;Q14767	16;16;16	16;16;16	16;16;16	Latent-transforming growth factor beta-binding protein 2	LTBP2	tr|G3V511|G3V511_HUMAN Latent-transforming growth factor beta-binding protein 2 OS=Homo sapiens OX=9606 GN=LTBP2 PE=1 SV=1;tr|G3V3X5|G3V3X5_HUMAN Latent-transforming growth factor beta-binding protein 2 OS=Homo sapiens OX=9606 GN=LTBP2 PE=1 SV=1;sp|Q14767|	3	16	16	16	10.2	10.2	10.2	189.24	1769	1769;1777;1821	0	50.587	334950	670090	365690	170770	222010	227210	163210	299400	395670	349490	747790000	22				1890	3012;3584;6883;7397;16517;21339;22675;22676;30533;49755;49843;51819;52830;54207;54873;66005	True;True;True;True;True;True;True;True;True;True;True;True;True;True;True;True	3222;3829;7399;7935;17723;22855;24283;24284;32723;53857;53951;56037;57113;58596;59298;71315	6361;7448;14022;14023;14797;14798;32550;42063;42064;44635;44636;61707;101500;101692;105576;107436;109913;109914;111047;134132	8712;10174;10175;18862;18863;19817;19818;43694;56676;56677;56678;60115;60116;83146;135881;136119;141309;143756;146909;146910;148401;179714	8712;10175;18862;19818;43694;56676;60115;60116;83146;135881;136119;141309;143756;146910;148401;179714			-1;-1;-1				LTBP2
REV__M0QYI1;REV__M0R3C8;REV__M0QYH2;REV__Q96T60	REV__M0QYI1;REV__M0R3C8;REV__M0QYH2;REV__Q96T60	1;1;1;1	1;1;1;1	1;1;1;1			tr|M0QYI1|M0QYI1_HUMAN Bifunctional polynucleotide phosphatase/kinase (Fragment) OS=Homo sapiens OX=9606 GN=PNKP PE=1 SV=2;tr|M0R3C8|M0R3C8_HUMAN Bifunctional polynucleotide phosphatase/kinase OS=Homo sapiens OX=9606 GN=PNKP PE=1 SV=1;tr|M0QYH2|M0QYH2_HUMA	4	1	1	1	0	0	0	26.912	247	247;455;490;521	0.0062596	1.3869	16613	33052	19245	6474.8	13667	12373	2041.2	24079	57500	8775.7	2101700000	1		+		7506	39562	TRUE	42317	79693	107260	107260			-1;-1;-1;-1
G3V4U0;Q9UBX5;G3V3Y2;G3XA98	G3V4U0;Q9UBX5;G3V3Y2;G3XA98	2;2;1;1	2;2;1;1	2;2;1;1	Fibulin-5	FBLN5	tr|G3V4U0|G3V4U0_HUMAN Fibulin-5 OS=Homo sapiens OX=9606 GN=FBLN5 PE=1 SV=1;sp|Q9UBX5|FBLN5_HUMAN Fibulin-5 OS=Homo sapiens OX=9606 GN=FBLN5 PE=1 SV=1;tr|G3V3Y2|G3V3Y2_HUMAN Fibulin-5 (Fragment) OS=Homo sapiens OX=9606 GN=FBLN5 PE=1 SV=1;tr|G3XA98|G3XA98_H	4	2	2	2	4.6	4.6	4.6	50.881	453	453;448;91;489	0	5.6976	25933	66053	41710	25931	38764	40405	25487	29063	39527	34451	58056000	3				1893	10697;47651	True;True	11496;51636	21184;97185;97186	28289;130417;130418	28289;130418			-1;-1;-1;-1				FBLN5
REV__Q5TH58;REV__Q9H6K1	REV__Q5TH58;REV__Q9H6K1	1;1	1;1	1;1			tr|Q5TH58|Q5TH58_HUMAN Protein ILRUN OS=Homo sapiens OX=9606 GN=ILRUN PE=1 SV=1;sp|Q9H6K1|ILRUN_HUMAN Protein ILRUN OS=Homo sapiens OX=9606 GN=ILRUN PE=1 SV=2	2	1	1	1	0	0	0	24.618	224	224;298	0.0059839	1.3963	108730	55046	91556	26751	20044	9320.2	2786.6	35495	26773	7447.6	113420000	2		+		7531	9984	TRUE	10689	19654;19655	26191;26192	26191			-1;-1
P69905;A0A2R8Y7C0	P69905;A0A2R8Y7C0	13;8	13;8	7;3	Hemoglobin subunit alpha	HBA1	sp|P69905|HBA_HUMAN Hemoglobin subunit alpha OS=Homo sapiens OX=9606 GN=HBA1 PE=1 SV=2;tr|A0A2R8Y7C0|A0A2R8Y7C0_HUMAN Hemoglobin subunit alpha (Fragment) OS=Homo sapiens OX=9606 GN=HBA2 PE=1 SV=1	2	13	13	7	75.4	75.4	28.9	15.257	142	142;134	0	297.53	7317400	9502200	10150000	6901300	16317000	12217000	8238500	7716300	9940100	6454800	511270000000	458				4300	798;19568;37965;40222;41152;59661;59813;60545;61280;61281;62643;62644;62645	True;True;True;True;True;True;True;True;True;True;True;True;True	850;20962;40625;43207;43208;44616;64450;64616;64617;65409;66203;66204;67673;67674;67675;67676	1610;1611;1612;38507;38508;38509;38510;38511;38512;38513;38514;38515;38516;38517;76665;76666;76667;76668;76669;76670;76671;76672;76673;76674;76675;76676;76677;76678;76679;76680;76681;76682;76683;76684;76685;76686;76687;76688;76689;81432;81433;81434;81435;81436;81437;81438;81439;81440;81441;81442;81443;81444;81445;81446;81447;81448;81449;81450;81451;81452;81453;81454;81455;81456;81457;81458;81459;…	2201;2202;2203;51799;51800;51801;51802;51803;51804;51805;51806;51807;51808;51809;51810;103136;103137;103138;103139;103140;103141;103142;103143;103144;103145;103146;103147;103148;103149;103150;103151;103152;103153;103154;103155;103156;103157;103158;103159;103160;103161;103162;103163;103164;103165;103166;103167;103168;103169;103170;103171;103172;103173;103174;103175;103176;103177;103178;103179;1031…	2201;51800;103151;109654;113622;162298;162656;164887;166900;166937;170776;170813;170817	964;1326;4087	1;33;77	-1;-1				HBA1
P08697;A0A0G2JPA8;C9JMH6;A0A0J9YY65;C9JPV4;A0A0J9YWQ3;CON__P28800	P08697;A0A0G2JPA8;C9JMH6;A0A0J9YY65	7;5;4;4;3;3;1	7;5;4;4;3;3;1	7;5;4;4;3;3;1	Alpha-2-antiplasmin	SERPINF2	sp|P08697|A2AP_HUMAN Alpha-2-antiplasmin OS=Homo sapiens OX=9606 GN=SERPINF2 PE=1 SV=3;tr|A0A0G2JPA8|A0A0G2JPA8_HUMAN Alpha-2-antiplasmin OS=Homo sapiens OX=9606 GN=SERPINF2 PE=1 SV=1;tr|C9JMH6|C9JMH6_HUMAN Alpha-2-antiplasmin (Fragment) OS=Homo sapiens OX	7	7	7	7	12	12	12	54.565	491	491;427;255;255;264;264;492	0	16.964	214240	430540	399590	201340	316040	267560	215080	233960	345420	280460	747140000	11				3210	8637;15482;16748;18866;33236;34882;53638	True;True;True;True;True;True;True	9244;16560;17968;20206;35612;37352;57995	17014;30530;32975;37163;67363;70647;70648;108934	22724;40914;44230;50039;90338;90339;94993;94994;94995;94996;145680	22724;40914;44230;50039;90338;94993;145680			-1;-1;-1;-1;-1;-1;-1				SERPINF2
A0A140T9T6;A0A182DWE9;A0A140T9A5;A0A140T966;A0A140T915;A0A140T9Y2;A0A140T9Q1;A0A140T928;B4DJG1;A0A140T9T0;A0A140T8Z1;Q5Y7D3;A0A140T9S8	A0A140T9T6;A0A182DWE9;A0A140T9A5;A0A140T966;A0A140T915;A0A140T9Y2;A0A140T9Q1;A0A140T928	3;3;2;2;2;2;2;2;1;1;1;1;1	1;1;0;0;0;0;0;0;0;0;0;0;0	1;1;0;0;0;0;0;0;0;0;0;0;0			tr|A0A140T9T6|A0A140T9T6_HUMAN HLA class II histocompatibility antigen, DP beta 1 chain OS=Homo sapiens OX=9606 GN=HLA-DPB1 PE=1 SV=1;tr|A0A182DWE9|A0A182DWE9_HUMAN HLA class II histocompatibility antigen DP beta chain OS=Homo sapiens OX=9606 GN=HLA-DPB1 P	13	3	1	1	13.2	4.8	4.8	25.992	228	228;258;229;229;229;235;235;235;136;224;224;261;269	0.0073316	1.3201	8575.8	10094	28917	8655.9	7657.8	15798	8558.6	9143.2	9809.5	23867	7791100	1				542	5766;18880;66518	True;False;False	6214;20220;71856	11920;37186;135070	16079;50066;180911	16079;50066;180911			-1;-1;-1;-1;-1;-1;-1;-1;-1;-1;-1;-1;-1
P12107;P20908	P12107;P20908	1;1	1;1	1;1	Collagen alpha-1(XI) chain;Collagen alpha-1(V) chain	COL11A1;COL5A1	sp|P12107|COBA1_HUMAN Collagen alpha-1(XI) chain OS=Homo sapiens OX=9606 GN=COL11A1 PE=1 SV=4;sp|P20908|CO5A1_HUMAN Collagen alpha-1(V) chain OS=Homo sapiens OX=9606 GN=COL5A1 PE=1 SV=3	2	1	1	1	0.4	0.4	0.4	181.06	1806	1806;1838	0.0047807	1.5027	43770	87275	92975	62669	97534	49810	45174	30219	49360	66916	187810000	1				3315	22051	TRUE	23620	43486	58610	58610			-1;-1				COL11A1;COL5A1
Q5SRN5;Q5SRN7;A0A1W2PS24;P04439	Q5SRN5;Q5SRN7;A0A1W2PS24;P04439	13;12;12;12	5;5;5;5	2;2;2;2	HLA class I histocompatibility antigen, A-3 alpha chain	HLA-A	tr|Q5SRN5|Q5SRN5_HUMAN HLA class I histocompatibility antigen, A alpha chain OS=Homo sapiens OX=9606 GN=HLA-A PE=1 SV=2;tr|Q5SRN7|Q5SRN7_HUMAN HLA class I histocompatibility antigen, A alpha chain OS=Homo sapiens OX=9606 GN=HLA-A PE=1 SV=2;tr|A0A1W2PS24|A0	4	13	5	2	39.9	18.3	6.7	41.368	371	371;299;325;365	0	37.14	131540	203740	221550	157900	155700	107160	338500	118630	223790	231440	867100000	12				5027	4570;4920;8796;8797;18879;19391;54355;55323;60492;65058;65144;66102;67352	True;True;False;False;False;False;False;True;False;True;True;False;False	4939;5306;9418;9419;20219;20772;58750;59771;59772;65352;70300;70388;71417;72740	9509;10157;17340;17341;17342;17343;17344;17345;17346;37185;38197;110169;111938;111939;111940;122938;132385;132386;132387;132520;134294;136763	12901;13765;23174;23175;23176;23177;23178;23179;23180;23181;23182;50065;51404;147252;149577;149578;149579;164717;164718;177382;177383;177384;177385;177386;177387;177549;179929;183209	12901;13765;23174;23177;50065;51404;147252;149578;164717;177382;177549;179929;183209	4865	162	-1;-1;-1;-1				HLA-A
P05546	P05546	4	4	4	Heparin cofactor 2	SERPIND1	sp|P05546|HEP2_HUMAN Heparin cofactor 2 OS=Homo sapiens OX=9606 GN=SERPIND1 PE=1 SV=3	1	4	4	4	13.6	13.6	13.6	57.07	499	499	0	41.005	29966	53454	91650	40184	38528	22837	16755	21396	53063	36337	271510000	5				3121	22404;26637;44155;65984	True;True;True;True	23998;28546;47899;71292	44146;44147;53310;90401;134089	59474;59475;71633;121334;179654	59475;71633;121334;179654			-1				SERPIND1
F8VRE4;G3V513;F8W9L6;F5H006;A0A1B0GU45;Q12912	F8VRE4;G3V513;F8W9L6;F5H006;A0A1B0GU45;Q12912	1;1;1;1;1;1	1;1;1;1;1;1	1;1;1;1;1;1	Lymphoid-restricted membrane protein;Processed lymphoid-restricted membrane protein	LRMP	tr|F8VRE4|F8VRE4_HUMAN Inositol 1,4,5-triphosphate receptor-associated 2 (Fragment) OS=Homo sapiens OX=9606 GN=IRAG2 PE=1 SV=1;tr|G3V513|G3V513_HUMAN Inositol 1,4,5-triphosphate receptor-associated 2 (Fragment) OS=Homo sapiens OX=9606 GN=IRAG2 PE=1 SV=1;tr	6	1	1	1	8.5	8.5	8.5	12.994	118	118;120;348;446;1454;555	0.0001609	3.4855	2994.4	2972.6	3400.2	1790.2	2464.7	3167.2	3343.7	2655.4	3761.9	3628.4	6581400	1				565	13520	TRUE	14485	26622	35623	35623			-1;-1;-1;-1;-1;-1				LRMP
P51589;A0A3B3IT99;A0A3B3IU95	P51589;A0A3B3IT99;A0A3B3IU95	2;2;1	2;2;1	2;2;1	Cytochrome P450 2J2	CYP2J2	sp|P51589|CP2J2_HUMAN Cytochrome P450 2J2 OS=Homo sapiens OX=9606 GN=CYP2J2 PE=1 SV=2;tr|A0A3B3IT99|A0A3B3IT99_HUMAN Cytochrome P450 2J2 OS=Homo sapiens OX=9606 GN=CYP2J2 PE=1 SV=1;tr|A0A3B3IU95|A0A3B3IU95_HUMAN Cytochrome P450 2J2 OS=Homo sapiens OX=9606	3	2	2	2	4.4	4.4	4.4	57.61	502	502;402;355	0.00015418	2.8747	9200.3	15683	10381	8346.5	8745.9	8595.6	6521.3	7243.7	18168	11240	54448000	2				777	18227;20537	True;True	19536;21992	35856;40475	48208;54547	48208;54547			-1;-1;-1				CYP2J2
D7RIG5;A0A140T958;P79483	D7RIG5;A0A140T958;P79483	5;4;3	3;3;1	3;3;1	HLA class II histocompatibility antigen, DR beta 3 chain	HLA-DRB1;HLA-DRB3	tr|D7RIG5|D7RIG5_HUMAN HLA class II histocompatibility antigen DR beta chain OS=Homo sapiens OX=9606 GN=HLA-DRB1 PE=1 SV=1;tr|A0A140T958|A0A140T958_HUMAN HLA class II histocompatibility antigen, DRB1 beta chain (Fragment) OS=Homo sapiens OX=9606 GN=HLA-DRB	3	5	3	3	21.4	13.5	13.5	29.822	266	266;250;266	0	7.778	18151	22568	23198	22145	18390	62273	18178	25159	71480	21228	80448000	3				1432	6396;18881;22756;34569;49171	True;False;False;True;True	6878;20221;24368;37021;53239	13096;37187;44772;70023;100206	17656;50067;60268;94179;134262	17656;50067;60268;94179;134262			-1;-1;-1				HLA-DRB1;HLA-DRB3
Q13488	Q13488	2	1	1	V-type proton ATPase 116 kDa subunit a isoform 3	TCIRG1	sp|Q13488|VPP3_HUMAN V-type proton ATPase 116 kDa subunit a3 OS=Homo sapiens OX=9606 GN=TCIRG1 PE=1 SV=3	1	2	1	1	1.9	0.8	0.8	92.967	830	830	0.0047746	1.4907	5134.5	23267	7985.2	2446.6	4572.8	5443.1	1496.2	12304	25091	6019.3	30889000	1				4602	28222;35221	True;False	30222;37711	56740;71337;71338	76267;95912;95913	76267;95913			-1				TCIRG1
Q9HBI6;F8W978;V9GYP6;Q6NT55	Q9HBI6;F8W978;V9GYP6	8;6;4;1	8;6;4;1	7;5;3;1	Phylloquinone omega-hydroxylase CYP4F11	CYP4F11	sp|Q9HBI6|CP4FB_HUMAN Cytochrome P450 4F11 OS=Homo sapiens OX=9606 GN=CYP4F11 PE=1 SV=3;tr|F8W978|F8W978_HUMAN Cytochrome P450 4F11 OS=Homo sapiens OX=9606 GN=CYP4F11 PE=1 SV=1;tr|V9GYP6|V9GYP6_HUMAN Cytochrome P450 4F11 OS=Homo sapiens OX=9606 GN=CYP4F11	4	8	8	7	17.4	17.4	15.5	60.145	524	524;454;199;531	0	10.812	110930	174760	143730	81847	113130	135760	113180	102680	119850	143190	380680000	9				6697	870;8319;18872;26547;29010;33065;35162;47013	True;True;True;True;True;True;True;True	925;8903;20212;28449;31056;35429;37648;50959	1739;16438;37176;53096;58573;67018;71185;71186;96032	2387;21969;50053;71369;78932;89886;95701;95702;128904	2387;21969;50053;71369;78932;89886;95702;128904	5611	74	-1;-1;-1;-1				CYP4F11
P07996;CON__Q28194	P07996;CON__Q28194	15;11	15;11	14;11	Thrombospondin-1	THBS1	sp|P07996|TSP1_HUMAN Thrombospondin-1 OS=Homo sapiens OX=9606 GN=THBS1 PE=1 SV=2;	2	15	15	14	19.4	19.4	18.2	129.38	1170	1170;1170	0	82.12	228680	317540	670620	196080	289950	297640	256760	279210	283420	299000	626810000	24			+	3178	2547;4738;4822;6825;8072;10926;11262;21364;22643;24978;25038;41391;43075;52498;57310	True;True;True;True;True;True;True;True;True;True;True;True;True;True;True	2719;5115;5202;7338;8647;11733;12093;12094;22881;24250;26744;26808;44928;46735;56760;61916	5390;9819;9991;13918;15980;21623;22266;22267;42106;42107;42108;44573;49172;49302;49303;85197;85198;88350;88351;106815;116198	7456;7457;13317;13554;18742;21368;28877;29725;29726;29727;56729;56730;56731;60030;60031;66144;66318;66319;114514;114515;118584;118585;142952;155459	7456;13317;13554;18742;21368;28877;29727;56731;60031;66144;66319;114515;118585;142952;155459	2427	826	-1;-1				THBS1
Q96DC8;Q5W0J6;Q5W0J8	Q96DC8;Q5W0J6;Q5W0J8	3;2;2	3;2;2	3;2;2	Enoyl-CoA hydratase domain-containing protein 3, mitochondrial	ECHDC3	sp|Q96DC8|ECHD3_HUMAN Enoyl-CoA hydratase domain-containing protein 3, mitochondrial OS=Homo sapiens OX=9606 GN=ECHDC3 PE=1 SV=2;tr|Q5W0J6|Q5W0J6_HUMAN Enoyl-CoA hydratase domain-containing protein 3, mitochondrial (Fragment) OS=Homo sapiens OX=9606 GN=ECH	3	3	3	3	9.6	9.6	9.6	32.633	303	303;166;241	0	7.2443	90582	146610	79730	61139	150200	91500	86755	87073	84514	59309	184530000	4				6059	15827;42414;64687	True;True;True	16928;46011;69910;69911	31153;87021;131679;131680	41744;116889;176461;176462	41744;116889;176461			-1;-1;-1				ECHDC3
E9PFJ4;H0Y8L5;D6RHX6;E2QRH6;Q5VWP3;D6RD42	E9PFJ4;H0Y8L5;D6RHX6;E2QRH6;Q5VWP3;D6RD42	7;7;6;6;6;5	7;7;6;6;6;5	2;2;1;1;1;0	Muscular LMNA-interacting protein	MLIP	tr|E9PFJ4|E9PFJ4_HUMAN Muscular LMNA-interacting protein (Fragment) OS=Homo sapiens OX=9606 GN=MLIP PE=1 SV=1;tr|H0Y8L5|H0Y8L5_HUMAN Muscular LMNA-interacting protein (Fragment) OS=Homo sapiens OX=9606 GN=MLIP PE=1 SV=1;tr|D6RHX6|D6RHX6_HUMAN Muscular LMNA	6	7	7	2	44.9	44.9	14.8	21.319	196	196;329;226;268;458;123	0	67.056	193350	494640	365070	338280	490170	324870	326600	160010	257560	394530	1046500000	21				1597	1910;1911;10436;31258;52603;58421;60954	True;True;True;True;True;True;True	2047;2048;11219;33496;56874;63117;65850	4103;4104;4105;20731;20732;63222;63223;107019;107020;107021;118486;123874;123875;123876	5752;5753;5754;5755;5756;27695;27696;27697;27698;85068;85069;85070;85071;85072;143204;143205;143206;158700;165990;165991;165992	5752;5755;27697;85069;143204;158700;165992			-1;-1;-1;-1;-1;-1				MLIP
Q9UBH6	Q9UBH6	1	1	1	Xenotropic and polytropic retrovirus receptor 1	XPR1	sp|Q9UBH6|XPR1_HUMAN Xenotropic and polytropic retrovirus receptor 1 OS=Homo sapiens OX=9606 GN=XPR1 PE=1 SV=1	1	1	1	1	1.7	1.7	1.7	81.534	696	696	0.0038385	1.6435	1378	2423	1545.2	1399.9	2667.2	2169.2	2167.3	1642.1	2618.8	3125.5	6800400	1				7021	62413	TRUE	67425	127023	170218	170218			-1				XPR1
A1L4H1	A1L4H1	2	2	2	Soluble scavenger receptor cysteine-rich domain-containing protein SSC5D	SSC5D	sp|A1L4H1|SRCRL_HUMAN Soluble scavenger receptor cysteine-rich domain-containing protein SSC5D OS=Homo sapiens OX=9606 GN=SSC5D PE=1 SV=3	1	2	2	2	2	2	2	165.74	1573	1573	0	25.974	16977	28455	25829	8381.9	10998	13000	9724.6	15788	13870	16794	27772000	3				945	15364;15365	True;True	16440;16441	30272;30273;30274	40515;40516;40517	40515;40517			-1				SSC5D
Q8IWF6;H7C5D0;H7C598	Q8IWF6	3;1;1	3;1;1	3;1;1	Protein DENND6A	DENND6A	sp|Q8IWF6|DEN6A_HUMAN Protein DENND6A OS=Homo sapiens OX=9606 GN=DENND6A PE=1 SV=1	3	3	3	3	7.1	7.1	7.1	69.574	608	608;125;168	0	4.7532	27651	35220	27510	28803	25674	104050	24396	27220	30895	30713	27275000	3				5536	12517;28135;56844	True;True;True	13428;30130;61394	24753;56531;115180	33110;75979;154130	33110;75979;154130			-1;-1;-1				DENND6A
P02794;G3V192;G3V1D1;E9PPQ4;E9PRK8;E9PKY7;E9PQR3;E9PKM5;E9PK45	P02794;G3V192;G3V1D1	9;8;7;3;3;3;1;1;1	9;8;7;3;3;3;1;1;1	9;8;7;3;3;3;1;1;1	Ferritin heavy chain;Ferritin heavy chain, N-terminally processed;Ferritin	FTH1	sp|P02794|FRIH_HUMAN Ferritin heavy chain OS=Homo sapiens OX=9606 GN=FTH1 PE=1 SV=2;tr|G3V192|G3V192_HUMAN Ferritin OS=Homo sapiens OX=9606 GN=FTH1 PE=1 SV=1;tr|G3V1D1|G3V1D1_HUMAN Ferritin OS=Homo sapiens OX=9606 GN=FTH1 PE=1 SV=1	9	9	9	9	63.9	63.9	63.9	21.225	183	183;153;113;58;95;114;50;81;102	0	100.49	1659700	579830	545880	579890	591950	643410	577130	468550	530390	714050	11264000000	32				3060	26854;28025;32061;33119;40251;41627;43943;47014;66121	True;True;True;True;True;True;True;True;True	28777;30014;34357;34358;35485;43250;43251;45185;47673;50960;71436	54045;54046;54047;54048;54049;56330;56331;64954;64955;67110;67111;81553;81554;81555;85619;85620;90012;90013;90014;96033;96034;96035;134328;134329;134330	72648;72649;72650;72651;72652;72653;72654;72655;72656;75687;75688;75689;75690;87244;87245;90006;90007;109761;109762;109763;115053;115054;120813;120814;120815;120816;128905;128906;128907;179971;179972;179973	72651;75688;87245;90007;109761;115054;120815;128905;179972	2218;2219	101;159	-1;-1;-1;-1;-1;-1;-1;-1;-1				FTH1
E5RFF9;Q9BRT9	E5RFF9;Q9BRT9	1;1	1;1	1;1	DNA replication complex GINS protein SLD5;DNA replication complex GINS protein SLD5;DNA replication complex GINS protein SLD5, N-terminally processed	GINS4	tr|E5RFF9|E5RFF9_HUMAN DNA replication complex GINS protein SLD5 OS=Homo sapiens OX=9606 GN=GINS4 PE=1 SV=1;sp|Q9BRT9|SLD5_HUMAN DNA replication complex GINS protein SLD5 OS=Homo sapiens OX=9606 GN=GINS4 PE=1 SV=1	2	1	1	1	4.2	4.2	4.2	22.653	192	192;223	1	-2	108810	251080	122120	79178	116220	113690	63818	135520	273530	123630	930350000	3	+			1436	26447	TRUE	28333	52843;52844	71052;71053;71054	71053	1029	149	-1;-1				GINS4
P19827;F8WAS2;H7C0N0;CON__Q0VCM5;H7C5I0	P19827	9;3;2;2;1	9;3;2;2;1	9;3;2;2;1	Inter-alpha-trypsin inhibitor heavy chain H1	ITIH1	sp|P19827|ITIH1_HUMAN Inter-alpha-trypsin inhibitor heavy chain H1 OS=Homo sapiens OX=9606 GN=ITIH1 PE=1 SV=3	5	9	9	9	13.4	13.4	13.4	101.39	911	911;213;464;906;74	0	185.11	388100	576200	1105700	509190	559710	448050	359140	304410	533280	550630	1937800000	20				3470	373;15072;15073;18615;22734;23630;24687;44936;48408	True;True;True;True;True;True;True;True;True	383;16138;16139;19938;24345;24346;25290;25291;26437;48716;52433	660;29773;29774;29775;29776;36612;44734;44735;44736;46538;46539;46540;48575;91862;98595	875;876;39848;39849;39850;39851;39852;39853;49253;60228;60229;60230;62625;62626;62627;62628;65302;123284;132287;132288	876;39849;39853;49253;60230;62626;65302;123284;132288	2899;2900	557;614	-1;-1;-1;-1;-1				ITIH1
A0A182DWF4;Q5EP54;A0A140T8Z3;A0A0G2JJV3;A0A182DWG2;A0A182DWF5;A0A140T8Z7;A0A140T9P7	A0A182DWF4;Q5EP54;A0A140T8Z3;A0A0G2JJV3;A0A182DWG2;A0A182DWF5;A0A140T8Z7;A0A140T9P7	4;4;3;3;3;3;2;2	3;3;2;2;2;2;1;1	1;1;1;0;1;1;1;1		HLA-DPB1	tr|A0A182DWF4|A0A182DWF4_HUMAN HLA class II histocompatibility antigen, DP beta 1 chain OS=Homo sapiens OX=9606 GN=HLA-DPB1 PE=1 SV=1;tr|Q5EP54|Q5EP54_HUMAN HLA class II histocompatibility antigen DP beta chain OS=Homo sapiens OX=9606 GN=HLA-DPB1 PE=1 SV=1	8	4	3	1	16.2	12.3	3.1	25.897	228	228;258;228;228;229;235;229;235	0.00016213	3.6052	50763	93060	67584	56738	72737	53517	73722	58805	151640	63960	201380000	3				547	5765;9344;18880;66518	True;True;False;True	6213;10002;20220;71856	11919;18457;37186;135070	16078;24660;50066;180911	16078;24660;50066;180911			-1;-1;-1;-1;-1;-1;-1;-1				HLA-DPB1
A0A140T9V6;A0A140T911;A0A140T9Y4;A0A140T981;Q29967;A0A140T9R6;A0A0U5Q247;A0A140T8Z5;A0A0D5XQ77;P01920	A0A140T9V6;A0A140T911;A0A140T9Y4;A0A140T981;Q29967;A0A140T9R6;A0A0U5Q247;A0A140T8Z5;A0A0D5XQ77;P01920	1;1;1;1;1;1;1;1;1;1	1;1;1;1;1;1;1;1;1;1	1;1;1;1;1;1;1;1;1;1	HLA class II histocompatibility antigen, DQ beta 1 chain	HLA-DQB1	tr|A0A140T9V6|A0A140T9V6_HUMAN HLA class II histocompatibility antigen, DQ beta 1 chain OS=Homo sapiens OX=9606 GN=HLA-DQB1 PE=1 SV=1;tr|A0A140T911|A0A140T911_HUMAN HLA class II histocompatibility antigen, DQ beta 1 chain OS=Homo sapiens OX=9606 GN=HLA-DQB	10	1	1	1	11.9	11.9	11.9	15.144	134	134;134;144;144;224;224;261;269;269;261	0.00016526	3.8969	16004	7274.3	8524.3	5572.2	6686.6	1484	1305.3	5675.7	13511	3831.1	26720000	1				431	41645	TRUE	45203	85644	115084	115084			-1;-1;-1;-1;-1;-1;-1;-1;-1;-1				HLA-DQB1
Q4L180;C9JYJ6	Q4L180;C9JYJ6	3;2	3;2	3;2	Filamin A-interacting protein 1-like	FILIP1L	sp|Q4L180|FIL1L_HUMAN Filamin A-interacting protein 1-like OS=Homo sapiens OX=9606 GN=FILIP1L PE=1 SV=2;tr|C9JYJ6|C9JYJ6_HUMAN Filamin A-interacting protein 1-like (Fragment) OS=Homo sapiens OX=9606 GN=FILIP1L PE=1 SV=1	2	3	3	3	2.3	2.3	2.3	130.38	1135	1135;837	0.0027193	1.7393	78992	117540	87924	69799	126130	91595	107220	81898	129360	88097	474670000	4				4939	37314;38722;47869	True;True;True	39940;41428;51863	75370;78093;97545	101387;101388;105077;130898	101387;105077;130898			-1;-1				FILIP1L
Q15113	Q15113	3	3	3	Procollagen C-endopeptidase enhancer 1	PCOLCE	sp|Q15113|PCOC1_HUMAN Procollagen C-endopeptidase enhancer 1 OS=Homo sapiens OX=9606 GN=PCOLCE PE=1 SV=2	1	3	3	3	8.7	8.7	8.7	47.972	449	449	0	14.295	79064	169180	235330	103790	102710	65320	99929	85816	171510	111800	137690000	5				4767	14257;56255;56778	True;True;True	15266;60769;61326	28037;28038;114066;115077;115078	37565;37566;152652;154002;154003	37565;152652;154003			-1				PCOLCE
P02790;Q9BS19	P02790;Q9BS19	14;9	14;9	14;9	Hemopexin	HPX	sp|P02790|HEMO_HUMAN Hemopexin OS=Homo sapiens OX=9606 GN=HPX PE=1 SV=2;tr|Q9BS19|Q9BS19_HUMAN Epididymis secretory sperm binding protein OS=Homo sapiens OX=9606 GN=HPX PE=1 SV=1	2	14	14	14	33.8	33.8	33.8	51.676	462	462;254	0	80.573	624150	1365000	1403000	667190	1041700	835190	631550	721730	843200	739300	7125600000	46				3058	11924;17983;18868;18869;21743;22661;41960;45791;49595;51843;60417;64887;65132;67628	True;True;True;True;True;True;True;True;True;True;True;True;True;True	12793;12794;19275;20208;20209;23288;24269;45531;49637;53681;56061;65273;65274;70121;70376;73036	23552;23553;23554;23555;35414;35415;37166;37167;37168;37169;37170;37171;37172;37173;42838;44604;44605;86195;86196;86197;93623;101144;101145;105610;105611;105612;122775;122776;132091;132092;132507;132508;137261	31463;31464;31465;31466;31467;47631;47632;50042;50043;50044;50045;50046;50047;50048;50049;50050;57722;57723;60075;60076;115802;115803;115804;115805;115806;125766;135428;135429;141351;141352;141353;141354;141355;141356;141357;164500;164501;164502;176993;176994;176995;177533;177534;177535;183821;183822	31464;47631;50043;50050;57722;60076;115803;125766;135428;141354;164501;176993;177534;183821	2215;2216	229;409	-1;-1				HPX
O75084	O75084	1	1	1	Frizzled-7	FZD7	sp|O75084|FZD7_HUMAN Frizzled-7 OS=Homo sapiens OX=9606 GN=FZD7 PE=1 SV=2	1	1	1	1	1.7	1.7	1.7	63.619	574	574	0.0054424	1.4258	13664	19539	14900	9196.6	16268	16358	14113	13172	13555	16419	30481000	1				2717	8018	TRUE	8590	15887	21237	21237			-1				FZD7
Q9P0S9	Q9P0S9	1	1	1	Transmembrane protein 14C	TMEM14C	sp|Q9P0S9|TM14C_HUMAN Transmembrane protein 14C OS=Homo sapiens OX=9606 GN=TMEM14C PE=1 SV=1	1	1	1	1	8.9	8.9	8.9	11.564	112	112	0.00015995	3.3969	490.13	282.97	354.53	296.19	472.6	535.66	513.33	367.05	562.54	375.78	43867000	2				6978	61576	TRUE	66517	125122;125123	167652;167653	167652			-1				TMEM14C
P59666;P59665	P59666;P59665	3;3	3;3	3;3	Neutrophil defensin 3;HP 3-56;Neutrophil defensin 2;Neutrophil defensin 1;HP 1-56;Neutrophil defensin 2	DEFA3;DEFA1	sp|P59666|DEF3_HUMAN Neutrophil defensin 3 OS=Homo sapiens OX=9606 GN=DEFA3 PE=1 SV=1;sp|P59665|DEF1_HUMAN Neutrophil defensin 1 OS=Homo sapiens OX=9606 GN=DEFA1 PE=1 SV=1	2	3	3	3	20.2	20.2	20.2	10.245	94	94;94	0	7.4017	57108	107820	116420	47403	145270	171380	128170	117400	70127	61552	1310100000	5				4154	29401;29402;66297	True;True;True	31503;31504;71625	59507;59508;134656;134657	80200;80201;180382;180383;180384	80200;80201;180384			-1;-1				DEFA3;DEFA1
P31949	P31949	6	6	6	Protein S100-A11;Protein S100-A11, N-terminally processed	S100A11	sp|P31949|S10AB_HUMAN Protein S100-A11 OS=Homo sapiens OX=9606 GN=S100A11 PE=1 SV=2	1	6	6	6	45.7	45.7	45.7	11.74	105	105	0	104.58	517010	785090	555150	280950	455180	385430	438920	495630	615470	560020	5605200000	11				3705	9105;10492;30122;43300;56264;65647	True;True;True;True;True;True	9746;11278;32292;46973;60780;70927	17934;17935;20829;60931;60932;88714;88715;114085;133414	23949;23950;23951;27839;82105;82106;82107;119086;119087;152674;178695	23949;27839;82105;119086;152674;178695			-1				S100A11
Q9BXN1;A0A494C084;A0A494C1J0;Q5TBF2	Q9BXN1	9;2;2;2	9;2;2;2	9;2;2;2	Asporin	ASPN	sp|Q9BXN1|ASPN_HUMAN Asporin OS=Homo sapiens OX=9606 GN=ASPN PE=1 SV=2	4	9	9	9	19.2	19.2	19.2	43.417	380	380;124;152;243	0	18.526	249280	573100	310530	214090	317010	340160	217850	263490	296840	370120	1217200000	14				6459	14688;14717;23450;29503;31813;40497;61573;63633;67600	True;True;True;True;True;True;True;True;True	15730;15760;25103;31614;34095;43603;43604;66514;68778;73005;73006	28952;29006;29007;29008;46161;59691;64526;82216;82217;125112;125113;129497;137218;137219	38731;38793;38794;38795;62075;80429;86713;110612;110613;167636;167637;173519;183769;183770	38731;38793;62075;80429;86713;110612;167636;173519;183769	5498;5499	106;359	-1;-1;-1;-1				ASPN
X6R3L3;Q70IA8	X6R3L3;Q70IA8	1;1	1;1	1;1	MOB kinase activator 3C	MOB3C	tr|X6R3L3|X6R3L3_HUMAN MOB kinase activator 3C OS=Homo sapiens OX=9606 GN=MOB3C PE=1 SV=1;sp|Q70IA8|MOB3C_HUMAN MOB kinase activator 3C OS=Homo sapiens OX=9606 GN=MOB3C PE=1 SV=1	2	1	1	1	3	3	3	31.725	268	268;216	0.0066574	1.357	14175	18421	15494	8303.4	12751	13832	17205	13836	14884	13916	17826000	2				5329	41967	TRUE	45538	86204;86205	115814;115815	115815			-1;-1				MOB3C
Q06828;A0A3B3IRN5;O60938	Q06828;A0A3B3IRN5	8;7;1	8;7;1	8;7;1	Fibromodulin	FMOD	sp|Q06828|FMOD_HUMAN Fibromodulin OS=Homo sapiens OX=9606 GN=FMOD PE=1 SV=2;tr|A0A3B3IRN5|A0A3B3IRN5_HUMAN Fibromodulin OS=Homo sapiens OX=9606 GN=FMOD PE=1 SV=1	3	8	8	8	22.9	22.9	22.9	43.178	376	376;287;352	0	68.529	364300	751820	420690	314190	379790	347290	377050	305740	348260	402610	1839900000	18				4453	8049;29487;33403;33404;40766;50623;52870;66709	True;True;True;True;True;True;True;True	8622;8623;31596;35786;35787;44005;54775;57154;72055	15943;15944;15945;15946;59644;59645;67640;67641;83033;103337;107512;135564;135565	21325;21326;21327;21328;21329;80368;80369;90684;90685;111623;138250;143849;181580;181581;181582;181583;181584;181585	21327;80369;90684;90685;111623;138250;143849;181583	4269	90	-1;-1;-1				FMOD
P08603;A0A0D9SG88;Q5TFM2;B1AKG0;Q03591;A0A3B3IS28;A0A087WYK9;A0A3B3IRW0;A0A3B3ISW6;A0A3B3IS00;Q6NSD3;V9GYE7;A0A3B3IQ51;P36980;Q02985	P08603	30;14;12;3;3;1;1;1;1;1;1;1;1;1;1	30;14;12;3;3;1;1;1;1;1;1;1;1;1;1	30;14;12;3;3;1;1;1;1;1;1;1;1;1;1	Complement factor H	CFH	sp|P08603|CFAH_HUMAN Complement factor H OS=Homo sapiens OX=9606 GN=CFH PE=1 SV=4	15	30	30	30	28.4	28.4	28.4	139.09	1231	1231;449;385;271;330;146;195;205;210;216;232;254;355;270;330	0	184.37	742680	1249000	1545500	721340	1380500	999710	879940	887100	950660	944430	2589200000	51				3206	2256;4942;6939;7494;7512;9096;11393;14758;20605;21385;22104;26026;27625;27626;28673;30636;35042;38463;42043;42108;49865;50815;50816;53516;54467;56729;56762;58949;65441;65477	True;True;True;True;True;True;True;True;True;True;True;True;True;True;True;True;True;True;True;True;True;True;True;True;True;True;True;True;True;True	2415;5328;7460;8037;8055;9736;12231;15803;15804;22067;22906;23675;27877;29589;29590;30698;32834;32835;37516;41151;45616;45684;53974;54978;54979;54980;57866;58869;61275;61310;63674;70709;70747	4810;10192;14101;14958;14978;17915;17916;17917;22578;29087;29088;40598;42156;43585;51698;51699;55557;55558;55559;57948;61902;61903;61904;70943;77607;86325;86433;86434;101725;103799;103800;103801;103802;108713;110348;110349;110350;115009;115010;115058;119615;133071;133128	6672;13812;18966;20020;20045;23925;23926;23927;30179;30180;38896;38897;54709;56790;56791;58747;69533;69534;74604;74605;74606;78114;83395;83396;83397;95413;95414;104439;115972;116116;116117;136159;138966;138967;138968;138969;145394;145395;147471;147472;147473;147474;147475;147476;147477;153914;153915;153979;160177;178261;178334	6672;13812;18966;20020;20045;23925;30180;38897;54709;56790;58747;69533;74604;74605;78114;83397;95414;104439;115972;116116;136159;138966;138968;145394;147476;153915;153979;160177;178261;178334	2457;2458	162;1174	-1;-1;-1;-1;-1;-1;-1;-1;-1;-1;-1;-1;-1;-1;-1				CFH
Q8NFU7	Q8NFU7	2	2	2	Methylcytosine dioxygenase TET1	TET1	sp|Q8NFU7|TET1_HUMAN Methylcytosine dioxygenase TET1 OS=Homo sapiens OX=9606 GN=TET1 PE=1 SV=2	1	2	2	2	0.7	0.7	0.7	235.31	2136	2136	0.0077295	1.2822	64784	148600	87564	41866	70792	61986	27107	95723	201070	57586	286500000	5				5754	19684;28989	True;True	21082;31035	38756;58541;58542;58543	52169;78891;78892;78893;78894	52169;78892			-1				TET1
P07585;F8VXZ8;F8VUF6;F8VWU0;F8VX58;H0YIH3;F8VNV6	P07585;F8VXZ8;F8VUF6;F8VWU0	15;10;10;10;6;4;4	15;10;10;10;6;4;4	14;10;10;10;6;3;3	Decorin	DCN	sp|P07585|PGS2_HUMAN Decorin OS=Homo sapiens OX=9606 GN=DCN PE=1 SV=1;tr|F8VXZ8|F8VXZ8_HUMAN Decorin (Fragment) OS=Homo sapiens OX=9606 GN=DCN PE=1 SV=1;tr|F8VUF6|F8VUF6_HUMAN Decorin (Fragment) OS=Homo sapiens OX=9606 GN=DCN PE=1 SV=1;tr|F8VWU0|F8VWU0_HUM	7	15	15	14	34.5	34.5	34.5	39.746	359	359;174;178;179;119;95;177	0	107.32	2333600	5675400	4551800	2227700	3238700	2436000	2007400	2550300	2630800	3205800	50779000000	96				3164	2632;8777;10018;15424;15425;15628;30239;42619;43308;54361;60321;63171;63900;64707;64708	True;True;True;True;True;True;True;True;True;True;True;True;True;True;True	2811;9395;10726;16502;16503;16721;32414;46222;46981;58756;58757;65170;68289;69067;69932;69933	5579;5580;5581;5582;5583;17267;19722;19723;19724;19725;19726;19727;30421;30422;30423;30424;30425;30426;30427;30428;30784;30785;61133;61134;61135;61136;61137;61138;61139;61140;87393;87394;87395;87396;88726;110179;110180;110181;110182;110183;110184;122594;122595;122596;128649;128650;128651;128652;129976;129977;129978;129979;129980;129981;131719;131720;131721;131722;131723;131724;131725;131726;13172…	7703;7704;7705;7706;7707;23062;26288;26289;26290;26291;26292;26293;26294;26295;40747;40748;40749;40750;40751;40752;40753;40754;40755;40756;40757;40758;40759;40760;40761;40762;40763;41229;41230;82355;82356;82357;82358;82359;82360;82361;82362;82363;82364;82365;82366;117346;117347;117348;117349;117350;117351;117352;119100;147262;147263;147264;147265;147266;147267;147268;147269;147270;147271;164259;1…	7706;23062;26292;40748;40763;41230;82364;117350;119100;147269;164259;172400;174115;176520;176525	2397	199	-1;-1;-1;-1;-1;-1;-1				DCN
Q16555	Q16555	35	1	0	Dihydropyrimidinase-related protein 2	DPYSL2	sp|Q16555|DPYL2_HUMAN Dihydropyrimidinase-related protein 2 OS=Homo sapiens OX=9606 GN=DPYSL2 PE=1 SV=1	1	35	1	0	76.4	1.6	0	62.293	572	572	0.0018852	1.9232	27937	16652	20186	19753	15152	15014	13672	56837	11503	20413	90576000	2				4862	389;3038;6103;9141;9142;9288;10344;10801;20130;20134;22961;23615;24711;25096;27348;28781;30391;30471;30573;30594;32101;32740;39898;41021;41144;44304;46088;47158;50810;54214;54215;57010;57096;59543;61192	False;False;False;False;False;False;False;False;False;False;False;False;False;False;False;False;True;False;False;False;False;False;False;False;False;False;False;False;False;False;False;False;False;False;False	400;401;3253;6568;9784;9785;9786;9787;9946;11117;11603;21566;21571;21572;21573;24587;24588;25274;26465;26870;29301;30811;32575;32657;32767;32789;32790;34402;35075;42744;42745;44401;44402;44602;44603;48053;49952;51110;54973;58604;58605;61580;61581;61673;64320;66106	688;689;690;691;6407;6408;6409;6410;6411;6412;6413;6414;6415;6416;6417;6418;12533;12534;12535;12536;18011;18012;18013;18014;18015;18016;18017;18350;18351;18352;18353;18354;18355;18356;18357;18358;18359;18360;18361;18362;18363;18364;18365;18366;18367;18368;18369;18370;20478;20479;20480;20481;20482;20483;20484;20485;20486;20487;21372;39643;39644;39651;39652;39653;39654;39655;39656;39657;39658;39659…	911;912;913;914;8767;8768;8769;8770;8771;8772;8773;8774;8775;8776;8777;8778;8779;8780;8781;8782;8783;8784;8785;8786;8787;8788;8789;8790;16917;16918;16919;16920;16921;16922;24059;24060;24061;24062;24063;24064;24065;24506;24507;24508;24509;24510;24511;24512;24513;24514;24515;24516;24517;24518;24519;24520;24521;24522;24523;24524;24525;24526;24527;24528;24529;24530;24531;24532;24533;24534;24535;24536…	912;8787;16921;24060;24065;24525;27320;28531;53386;53423;60858;62586;65352;66498;74013;78363;82783;82995;83274;83312;87343;88981;108464;112925;113590;121657;126538;129220;138950;146926;146929;154606;154917;161949;166627	490;491;493;494;495;496;497;498;499;500	37;64;78;83;103;152;168;362;375;437	-1				DPYSL2
P49716	P49716	1	1	1	CCAAT/enhancer-binding protein delta	CEBPD	sp|P49716|CEBPD_HUMAN CCAAT/enhancer-binding protein delta OS=Homo sapiens OX=9606 GN=CEBPD PE=1 SV=2	1	1	1	1	3.7	3.7	3.7	28.467	269	269	0.00015608	3.0421	18339	21392	32989	12826	23064	21561	28016	22955	25511	22535	2316800000	1				3951	39030	TRUE	41757	78626	105771	105771			-1				CEBPD
A8K7Q2;E9PS65;E9PM13	A8K7Q2;E9PS65	36;22;16	1;0;0	1;0;0		HSPA8	tr|A8K7Q2|A8K7Q2_HUMAN Heat shock cognate 71 kDa protein OS=Homo sapiens OX=9606 GN=HSPA8 PE=1 SV=1;tr|E9PS65|E9PS65_HUMAN Heat shock cognate 71 kDa protein (Fragment) OS=Homo sapiens OX=9606 GN=HSPA8 PE=1 SV=1	3	36	1	1	56.3	2.2	2.2	45.338	410	410;223;150	0.0010542	2.4801	35266	79490	44700	28235	35891	32341	21821	44430	97373	34609	531410000	2				1023	1361;1362;5021;5846;7239;7240;7241;9432;10388;13310;13311;18975;19025;24972;30302;30303;31028;31029;33455;36257;36258;38179;41162;41163;41176;41177;43362;43363;43537;43769;47930;49683;52433;53919;60299;62942	False;False;False;False;False;False;False;False;False;False;False;False;False;False;False;False;False;False;False;False;False;False;False;False;False;False;False;False;False;False;False;False;False;False;False;True	1455;1456;5410;6298;7773;7774;7775;10100;11167;14265;14266;20323;20373;26738;32481;32482;33246;33247;35840;38795;38796;40846;44632;44633;44634;44635;44652;44653;44654;44655;47044;47045;47233;47234;47483;51928;53779;56693;58288;65147;68041	2762;2763;2764;2765;10375;10376;10377;10378;10379;10380;10381;10382;12045;12046;12047;12048;12049;12050;12051;12052;12053;12054;14548;14549;14550;14551;18643;18644;18645;20632;20633;20634;20635;20636;26202;26203;26204;26205;26206;26207;26208;26209;37384;37470;37471;49156;49157;49158;49159;49160;49161;61254;61255;61256;61257;61258;61259;61260;61261;61262;61263;61264;61265;62641;62642;62643;62644;6…	3801;3802;3803;3804;14043;14044;14045;14046;14047;14048;14049;14050;14051;14052;14053;16233;16234;16235;16236;16237;16238;16239;16240;16241;16242;16243;16244;19506;19507;19508;19509;19510;24914;24915;24916;27575;27576;27577;27578;27579;27580;27581;27582;27583;35061;35062;35063;35064;35065;35066;35067;35068;50323;50434;50435;66109;66110;66111;66112;66113;66114;66115;66116;66117;66118;66119;66120;6…	3801;3803;14045;16233;19506;19508;19509;24914;27581;35062;35068;50323;50435;66119;82515;82530;84339;84343;90824;98491;98492;103753;113689;113698;113743;113756;119230;119235;119787;120370;131120;135648;142781;146256;164198;171694	354;796;797	1;282;313	-1;-1;-1				HSPA8
P84074	P84074	8	1	1	Neuron-specific calcium-binding protein hippocalcin	HPCA	sp|P84074|HPCA_HUMAN Neuron-specific calcium-binding protein hippocalcin OS=Homo sapiens OX=9606 GN=HPCA PE=1 SV=2	1	8	1	1	35.8	7.3	7.3	22.427	193	193	0.00015645	3.0591	17183	25168	19389	18286	28314	25687	31810	17545	23255	19419	46599000	1				4348	8053;30732;38194;40742;40743;41199;46845;51079	True;False;False;False;False;False;False;False	8627;32938;40861;43967;43968;43969;43970;44688;44689;50751;50752;55260	15950;62083;77138;82931;82932;82933;82934;82935;82936;82937;82938;82939;82940;82941;82942;82943;82944;84698;84699;95640;95641;104311;104312	21333;83624;103804;111490;111491;111492;111493;111494;111495;111496;111497;111498;111499;111500;111501;111502;111503;111504;111505;113889;113890;113891;128428;128429;139644;139645	21333;83624;103804;111492;111504;113890;128429;139644	3389;3390;3391	136;138;156	-1				HPCA
Q6UX06	Q6UX06	2	2	2	Olfactomedin-4	OLFM4	sp|Q6UX06|OLFM4_HUMAN Olfactomedin-4 OS=Homo sapiens OX=9606 GN=OLFM4 PE=1 SV=1	1	2	2	2	5.1	5.1	5.1	57.279	510	510	0.00016173	3.568	10705	17512	18664	10544	24527	49452	10983	20685	16997	12417	36718000	2				5274	56238;63548	True;True	60752;68690	114041;129344	152619;173325	152619;173325			-1				OLFM4
P08567	P08567	1	1	1	Pleckstrin	PLEK	sp|P08567|PLEK_HUMAN Pleckstrin OS=Homo sapiens OX=9606 GN=PLEK PE=1 SV=3	1	1	1	1	3.7	3.7	3.7	40.124	350	350	0	25.459	24945	29016	37363	15841	20380	25164	25460	24609	30442	22286	71069000	2				3198	24797	TRUE	26554	48784;48785	65593;65594	65594			-1				PLEK
H0Y8Q6;O15438	H0Y8Q6;O15438	2;2	2;2	2;2	Canalicular multispecific organic anion transporter 2	ABCC3	tr|H0Y8Q6|H0Y8Q6_HUMAN Canalicular multispecific organic anion transporter 2 (Fragment) OS=Homo sapiens OX=9606 GN=ABCC3 PE=1 SV=1;sp|O15438|MRP3_HUMAN Canalicular multispecific organic anion transporter 2 OS=Homo sapiens OX=9606 GN=ABCC3 PE=1 SV=3	2	2	2	2	6.7	6.7	6.7	32.841	300	300;1527	0	5.0759	26692	25538	28370	13933	26333	28565	17023	25789	36728	24086	45378000	2				1969	1011;62401	True;True	1080;67413	2040;127000	2815;170188	2815;170188			-1;-1				ABCC3
P02775	P02775	4	4	4	Platelet basic protein;Connective tissue-activating peptide III;TC-2;Connective tissue-activating peptide III(1-81);Beta-thromboglobulin;Neutrophil-activating peptide 2(74);Neutrophil-activating peptide 2(73);Neutrophil-activating peptide 2;TC-1;Neutrophil-activating peptide 2(1-66);Neutrophil-activating peptide 2(1-63)	PPBP	sp|P02775|CXCL7_HUMAN Platelet basic protein OS=Homo sapiens OX=9606 GN=PPBP PE=1 SV=3	1	4	4	4	35.9	35.9	35.9	13.894	128	128	0	12.686	115120	102950	244760	62569	130360	140590	102400	141070	133720	109710	556640000	8				3054	13605;24942;27401;42368	True;True;True;True	14576;26707;29357;45962	26766;26767;49108;55183;86921	35815;35816;35817;35818;66048;74108;116755;116756	35818;66048;74108;116755			-1				PPBP
C9JEN3;C9IYT2;F8WDY4;C9IZ27;C9JW19;C9JWV9;B4DUD2;Q969X1	C9JEN3;C9IYT2;F8WDY4;C9IZ27;C9JW19;C9JWV9;B4DUD2;Q969X1	2;2;2;2;2;2;2;2	2;2;2;2;2;2;2;2	2;2;2;2;2;2;2;2	Protein lifeguard 3	TMBIM1	tr|C9JEN3|C9JEN3_HUMAN Protein lifeguard 3 (Fragment) OS=Homo sapiens OX=9606 GN=TMBIM1 PE=1 SV=1;tr|C9IYT2|C9IYT2_HUMAN Protein lifeguard 3 (Fragment) OS=Homo sapiens OX=9606 GN=TMBIM1 PE=1 SV=1;tr|F8WDY4|F8WDY4_HUMAN Protein lifeguard 3 OS=Homo sapiens O	8	2	2	2	14.2	14.2	14.2	11.535	106	106;107;140;150;167;171;215;311	0	57.678	96707	166400	108040	67434	93720	105430	87778	103490	155390	157240	601740000	5				1126	6341;6342	True;True	6822;6823	13019;13020;13021;13022	17561;17562;17563;17564;17565	17561;17563			-1;-1;-1;-1;-1;-1;-1;-1				TMBIM1
P09105	P09105	2	2	2	Hemoglobin subunit theta-1	HBQ1	sp|P09105|HBAT_HUMAN Hemoglobin subunit theta-1 OS=Homo sapiens OX=9606 GN=HBQ1 PE=1 SV=2	1	2	2	2	16.9	16.9	16.9	15.508	142	142	0	10.145	47513	63203	63075	44863	96164	87656	39838	53705	71150	53927	160820000	2				3215	34955;56604	True;True	37427;61142	70796;114755	95221;153589	95221;153589			-1				HBQ1
A0A087WXK2;A0A087WUL4;A0A087WX23;Q86TG7;A0A087WZG9;B4DSP0;A0A087WYS2	A0A087WXK2;A0A087WUL4;A0A087WX23;Q86TG7;A0A087WZG9;B4DSP0	13;13;13;13;9;9;1	13;13;13;13;9;9;1	13;13;13;13;9;9;1	Retrotransposon-derived protein PEG10	PEG10	tr|A0A087WXK2|A0A087WXK2_HUMAN Retrotransposon-derived protein PEG10 OS=Homo sapiens OX=9606 GN=PEG10 PE=1 SV=1;tr|A0A087WUL4|A0A087WUL4_HUMAN Retrotransposon-derived protein PEG10 OS=Homo sapiens OX=9606 GN=PEG10 PE=1 SV=1;tr|A0A087WX23|A0A087WX23_HUMAN R	7	13	13	13	20.4	20.4	20.4	80.101	707	707;741;783;708;359;401;31	0	88.859	93518	103320	101530	107540	103860	108220	101900	43374	104650	1962200	2503100000	24				69	4457;16807;20847;26928;26929;37764;38553;38554;38778;47619;50024;52509;67712	True;True;True;True;True;True;True;True;True;True;True;True;True	4822;18028;22327;28858;28859;40417;41247;41248;41489;51603;54138;56772;73124	9321;33073;33074;33075;41080;41081;54215;54216;54217;76190;77778;77779;77780;78185;97141;102029;102030;106832;137408	12667;12668;44352;44353;44354;44355;44356;55350;55351;55352;72855;72856;72857;102471;104663;104664;104665;105196;130359;136534;136535;142972;142973;184020	12667;44356;55352;72855;72856;102471;104663;104665;105196;130359;136535;142973;184020			-1;-1;-1;-1;-1;-1;-1				PEG10
Q16610	Q16610	1	1	1	Extracellular matrix protein 1	ECM1	sp|Q16610|ECM1_HUMAN Extracellular matrix protein 1 OS=Homo sapiens OX=9606 GN=ECM1 PE=1 SV=2	1	1	1	1	2.4	2.4	2.4	60.673	540	540	0	6.3977	15344	28095	33702	15569	17629	14101	14593	15159	22425	15059	16561000	1				4869	43804	TRUE	47520	89723	120442	120442			-1				ECM1
P19823;Q5T985;Q5T987	P19823;Q5T985	12;12;5	12;12;5	7;7;3	Inter-alpha-trypsin inhibitor heavy chain H2	ITIH2	sp|P19823|ITIH2_HUMAN Inter-alpha-trypsin inhibitor heavy chain H2 OS=Homo sapiens OX=9606 GN=ITIH2 PE=1 SV=2;tr|Q5T985|Q5T985_HUMAN Inter-alpha-trypsin inhibitor heavy chain H2 OS=Homo sapiens OX=9606 GN=ITIH2 PE=1 SV=1	3	12	12	7	12.6	12.6	7.1	106.46	946	946;935;237	0	46.602	436110	440480	824010	410430	435020	329730	279470	278450	524790	496650	2358500000	23				3469	20811;25689;29707;30779;39841;41606;52614;54222;56514;58544;63426;63557	True;True;True;True;True;True;True;True;True;True;True;True	22289;27511;31827;32989;42659;42660;45161;56889;58612;61045;63248;68558;68699	41031;50733;60086;62170;62171;62172;80358;80359;85579;107050;109939;114560;118750;118751;129126;129127;129364	55288;68282;81023;81024;81025;83728;83729;83730;83731;83732;108184;108185;114996;114997;143242;146937;153308;159059;159060;173054;173055;173056;173352	55288;68282;81024;83730;108184;114997;143242;146937;153308;159059;173054;173352			-1;-1;-1				ITIH2
REV__Q8IWV2	REV__Q8IWV2	1	1	1			sp|Q8IWV2|CNTN4_HUMAN Contactin-4 OS=Homo sapiens OX=9606 GN=CNTN4 PE=1 SV=1	1	1	1	1	0	0	0	113.45	1026	1026	0.0034198	1.6743	24973	22042	26945	29499	40115	28179	30823	12537	25977	7852.5	412890000	1		+		7536	21216	TRUE	22727	41872	56428	56428			-1
A0A5F9ZI26;P25189;A0A0J9YWT2;E9PL80	A0A5F9ZI26;P25189	25;19;9;5	25;19;9;5	25;19;9;5	Myelin protein P0	MPZ	tr|A0A5F9ZI26|A0A5F9ZI26_HUMAN Myelin peripheral protein OS=Homo sapiens OX=9606 GN=MPZ PE=1 SV=1;sp|P25189|MYP0_HUMAN Myelin protein P0 OS=Homo sapiens OX=9606 GN=MPZ PE=1 SV=1	4	25	25	25	50.3	50.3	50.3	34.386	312	312;248;136;52	0	119.44	2947700	8603200	7234800	6113400	8824400	5358100	4199700	2692700	4525600	6412900	167060000000	269				910	7801;8491;16938;17989;23293;23294;23326;23327;24344;24345;24346;29781;31000;35122;38008;42899;43167;47919;47920;49550;58848;58849;62866;67119;67120	True;True;True;True;True;True;True;True;True;True;True;True;True;True;True;True;True;True;True;True;True;True;True;True;True	8364;9089;18162;19281;24937;24938;24972;24973;26079;26080;26081;31904;33218;37603;40671;46540;46834;51916;51917;51918;53634;63567;63568;67952;67953;72495;72496	15515;15516;15517;15518;15519;15520;15521;15522;15523;15524;15525;15526;15527;16737;16738;16739;16740;16741;33315;33316;35426;35427;35428;35429;35430;35431;35432;35433;45877;45878;45879;45880;45881;45882;45883;45884;45940;45941;47960;47961;47962;47963;47964;47965;47966;47967;47968;47969;47970;47971;47972;47973;47974;47975;47976;47977;47978;47979;47980;47981;47982;47983;47984;47985;47986;47987;479…	20744;20745;20746;20747;20748;20749;20750;20751;20752;20753;20754;20755;20756;20757;20758;20759;20760;22350;22351;22352;22353;22354;22355;44723;44724;47647;47648;47649;47650;47651;47652;47653;47654;47655;47656;47657;61732;61733;61734;61735;61736;61737;61738;61739;61809;61810;64525;64526;64527;64528;64529;64530;64531;64532;64533;64534;64535;64536;64537;64538;64539;64540;64541;64542;64543;64544;645…	20753;22353;44723;47653;61736;61739;61809;61810;64550;64572;64577;81197;84268;95617;103285;118119;118815;131073;131105;135323;159934;159948;171482;182673;182676	712;713	222;275	-1;-1;-1;-1				MPZ
REV__Q9H223	REV__Q9H223	1	1	1			sp|Q9H223|EHD4_HUMAN EH domain-containing protein 4 OS=Homo sapiens OX=9606 GN=EHD4 PE=1 SV=1	1	1	1	1	0	0	0	61.174	541	541	1	-2	8316.6	19237	14724	10419	16279	8391.3	6173.3	7356.1	10841	10534	23451000	1	+	+		7553	29365	TRUE	31465	59411	80061	80061	6171	154	-1
F5GZZ9;C9JHR8;Q86VB7	F5GZZ9;C9JHR8;Q86VB7	12;12;12	12;12;12	12;12;12	Scavenger receptor cysteine-rich type 1 protein M130;Soluble CD163	CD163	tr|F5GZZ9|F5GZZ9_HUMAN Scavenger receptor cysteine-rich type 1 protein M130 OS=Homo sapiens OX=9606 GN=CD163 PE=1 SV=1;tr|C9JHR8|C9JHR8_HUMAN Scavenger receptor cysteine-rich type 1 protein M130 OS=Homo sapiens OX=9606 GN=CD163 PE=1 SV=1;sp|Q86VB7|C163A_HU	3	12	12	12	12	12	12	120.32	1109	1109;1154;1156	0	39.02	229960	605700	305660	160160	449490	454450	724990	519150	438270	232920	847810000	14				1287	6710;12821;21953;29327;33089;37340;38808;38965;46456;46457;54457;58106	True;True;True;True;True;True;True;True;True;True;True;True	7214;13746;23517;31422;35454;39970;41522;41689;50334;50335;58858;62783	13711;25306;43282;43283;59340;67056;75473;78245;78519;94933;94934;94935;110334;117695	18484;33847;58334;58335;79973;89933;101548;105271;105633;127511;127512;127513;147455;157407	18484;33847;58334;79973;89933;101548;105271;105633;127511;127512;147455;157407	936	810	-1;-1;-1				CD163
B4E1Z4;E7ETN3;P00751;A0A0G2JH38;H7C5H1;H7C526;C9JRT3;CON__Q3KUS7	B4E1Z4;E7ETN3;P00751;A0A0G2JH38	21;20;19;11;10;3;1;1	21;20;19;11;10;3;1;1	19;18;19;11;10;3;1;1	Complement factor B;Complement factor B Ba fragment;Complement factor B Bb fragment	CFB	tr|B4E1Z4|B4E1Z4_HUMAN C3/C5 convertase OS=Homo sapiens OX=9606 PE=1 SV=1;tr|E7ETN3|E7ETN3_HUMAN C3/C5 convertase OS=Homo sapiens OX=9606 PE=1 SV=1;sp|P00751|CFAB_HUMAN Complement factor B OS=Homo sapiens OX=9606 GN=CFB PE=1 SV=2;tr|A0A0G2JH38|A0A0G2JH38_H	8	21	21	19	13.8	13.8	12.5	140.94	1266	1266;1115;764;589;305;68;144;760	0	61.829	624300	1030100	1358800	539800	852920	712760	557270	698270	707500	821750	3286800000	41				1136	2871;3452;3453;7895;9129;10334;13459;14739;19572;19573;21600;30149;31066;37074;46598;46599;60148;60149;63740;63995;66257	True;True;True;True;True;True;True;True;True;True;True;True;True;True;True;True;True;True;True;True;True	3070;3691;3692;8464;9770;11107;14419;15783;20966;20967;23138;32321;33286;39688;50486;50487;64989;64990;68891;69165;71580	6084;7214;7215;7216;15688;17984;17985;20460;26494;29059;38521;38522;38523;42555;42556;60979;62725;62726;74787;74788;74789;74790;95155;95156;95157;95158;122252;122253;122254;129674;129675;130123;134582	8342;9875;9876;9877;9878;20969;20970;24025;24026;27287;35454;38863;51815;51816;51817;57344;57345;82162;84446;84447;100480;100481;100482;100483;100484;100485;100486;127785;127786;127787;127788;163764;163765;163766;163767;173736;173737;173738;174315;180289;180290	8342;9876;9878;20969;24026;27287;35454;38863;51815;51817;57344;82162;84446;100485;127786;127787;163764;163765;173737;174315;180289			-1;-1;-1;-1;-1;-1;-1;-1				CFB
P07357	P07357	6	6	6	Complement component C8 alpha chain	C8A	sp|P07357|CO8A_HUMAN Complement component C8 alpha chain OS=Homo sapiens OX=9606 GN=C8A PE=1 SV=2	1	6	6	6	11.3	11.3	11.3	65.163	584	584	0	52.944	145200	281480	379720	133090	189600	164820	137340	176320	158790	212820	281860000	7				3159	2773;4004;34951;39702;52925;63561	True;True;True;True;True;True	2966;4278;37423;42460;57211;68703	5884;8268;70791;79939;107594;107595;129368	8067;11258;95215;107608;143959;143960;173356	8067;11258;95215;107608;143959;173356	2386	414	-1				C8A
P01009	P01009	24	24	2	Alpha-1-antitrypsin;Short peptide from AAT	SERPINA1	sp|P01009|A1AT_HUMAN Alpha-1-antitrypsin OS=Homo sapiens OX=9606 GN=SERPINA1 PE=1 SV=3	1	24	24	2	49.3	49.3	5.7	46.736	418	418	0	296.27	2212000	5598900	6504200	1767900	3915400	3916500	3652700	4367700	3025500	2920500	80446000000	141				2997	6235;11280;19592;19614;19615;19932;24876;31983;32309;34862;37453;38173;38387;39583;39584;46138;49482;50698;53598;55123;61225;64678;65184;65186	True;True;True;True;True;True;True;True;True;True;True;True;True;True;True;True;True;True;True;True;True;True;True;True	6706;12113;20987;21010;21011;21360;21361;26641;34271;34621;37329;37330;40086;40840;41071;41072;42339;42340;50003;53564;54851;57953;59555;66145;69900;70431;70433	12787;12788;22321;22322;22323;22324;22325;22326;22327;38560;38561;38562;38563;38564;38593;38594;38595;38596;38597;38598;39247;39248;48951;64818;65451;65452;65453;70591;70592;70593;70594;70595;70596;70597;70598;70599;70600;70601;70602;70603;70604;70605;70606;75645;75646;75647;75648;75649;77089;77090;77091;77469;77470;77471;79729;79730;79731;79732;79733;79734;79735;79736;79737;94316;94317;100885;10…	17261;17262;17263;17264;29801;29802;29803;29804;29805;29806;29807;29808;29809;29810;29811;29812;29813;51865;51866;51867;51868;51869;51870;51871;51872;51873;51907;51908;51909;51910;51911;51912;51913;52822;52823;65811;87088;87860;87861;87862;87863;87864;94915;94916;94917;94918;94919;94920;94921;94922;94923;94924;94925;94926;94927;94928;94929;94930;94931;94932;94933;94934;94935;94936;101779;101780;1…	17262;29802;51866;51907;51911;52822;65811;87088;87861;94917;101781;103731;104244;107309;107315;126657;135112;138411;145572;148965;166734;176410;177633;177646	19;20;21;22;23	250;266;375;382;398	-1				SERPINA1
C9JGI3;P19971;A0A494C0L6;A0A494C0A4;A0A494C1N7;A0A494C1L9;A0A494BZZ4	C9JGI3;P19971;A0A494C0L6	10;10;8;3;3;1;1	10;10;8;3;3;1;1	10;10;8;3;3;1;1	Thymidine phosphorylase	TYMP	tr|C9JGI3|C9JGI3_HUMAN Thymidine phosphorylase (Fragment) OS=Homo sapiens OX=9606 GN=TYMP PE=1 SV=1;sp|P19971|TYPH_HUMAN Thymidine phosphorylase OS=Homo sapiens OX=9606 GN=TYMP PE=1 SV=2;tr|A0A494C0L6|A0A494C0L6_HUMAN Thymidine phosphorylase (Fragment) OS=	7	10	10	10	27.9	27.9	27.9	46.087	445	445;482;289;80;169;137;325	0	50.984	167130	261340	217490	137300	213870	161000	260520	195240	278560	175120	950100000	13				1286	3249;3733;5015;8954;19206;38055;40473;57829;59759;59763	True;True;True;True;True;True;True;True;True;True	3473;3987;5404;9588;20572;40719;43569;62464;64559;64564	6878;7732;10366;10367;17691;37862;76849;82136;117139;121347;121355	9434;10542;10543;14033;14034;23651;50962;103404;110499;156697;162505;162518;162519	9434;10543;14033;23651;50962;103404;110499;156697;162505;162518			-1;-1;-1;-1;-1;-1;-1				TYMP
P56159	P56159	4	4	4	GDNF family receptor alpha-1	GFRA1	sp|P56159|GFRA1_HUMAN GDNF family receptor alpha-1 OS=Homo sapiens OX=9606 GN=GFRA1 PE=1 SV=2	1	4	4	4	10.5	10.5	10.5	51.455	465	465	0	37.177	89047	145320	135530	103150	108970	108510	128540	72872	109580	93286	130020000	4				4134	886;15033;23791;50795	True;True;True;True	945;16094;25500;54958	1770;29697;46969;103734	2421;39750;63209;138863	2421;39750;63209;138863			-1				GFRA1
P00740	P00740	3	3	3	Coagulation factor IX;Coagulation factor IXa light chain;Coagulation factor IXa heavy chain	F9	sp|P00740|FA9_HUMAN Coagulation factor IX OS=Homo sapiens OX=9606 GN=F9 PE=1 SV=2	1	3	3	3	8.5	8.5	8.5	51.778	461	461	0	7.1437	42055	98137	114380	54374	76253	57988	51884	52375	59732	71643	117720000	3				2987	30430;50825;64006	True;True;True	32615;54989;69177	61526;103815;130153	82895;138984;174361	82895;138984;174361			-1				F9
Q05707;J3QT83;A0A0A0MQT7;Q4G0W3;H0YBB2	Q05707;J3QT83	43;23;15;13;6	43;23;15;13;6	43;23;15;13;6	Collagen alpha-1(XIV) chain	COL14A1	sp|Q05707|COEA1_HUMAN Collagen alpha-1(XIV) chain OS=Homo sapiens OX=9606 GN=COL14A1 PE=1 SV=3;tr|J3QT83|J3QT83_HUMAN Collagen alpha-1(XIV) chain (Fragment) OS=Homo sapiens OX=9606 GN=COL14A1 PE=1 SV=1	5	43	43	43	25.7	25.7	25.7	193.51	1796	1796;843;757;534;336	0	323.31	2067600	3588700	3700000	2099200	2998000	2191800	1917000	1880900	2154900	2115900	15902000000	108				4440	5091;8536;8882;9557;11339;11340;17142;17172;17585;21524;22014;22484;24349;25765;26930;26931;27954;28205;28300;30078;30437;35121;36451;36602;37342;38911;42839;43465;44245;45506;48011;57532;57694;57821;58036;60746;62029;63759;64378;64386;64598;64843;65118	True;True;True;True;True;True;True;True;True;True;True;True;True;True;True;True;True;True;True;True;True;True;True;True;True;True;True;True;True;True;True;True;True;True;True;True;True;True;True;True;True;True;True	5486;9138;9508;10233;12174;12175;18374;18404;18851;23054;23055;23581;23582;24086;26084;27592;28860;28861;29941;30204;30301;30302;32246;32622;37602;38992;39196;39972;41630;46467;47156;47991;49335;52014;62148;62323;62456;62710;65622;67010;68910;69573;69581;69814;70074;70362	10572;16824;17549;17550;18903;22487;22488;22489;22490;22491;33651;33704;33705;34482;42409;42410;42411;43396;43397;44307;47996;50928;50929;54218;54219;56210;56211;56700;56701;56702;56703;56856;56857;56858;56859;60858;61533;61534;71111;71112;71113;73539;74000;75475;75476;78420;87861;89103;90561;93056;97870;97871;97872;97873;116626;116926;116927;117130;117568;117569;117570;123431;123432;123433;12343…	14328;22465;22466;23463;23464;23465;23466;23467;25245;30053;30054;30055;30056;30057;30058;30059;45133;45210;45211;46263;57133;57134;57135;57136;58490;58491;59687;59688;59689;64580;68519;68520;72858;72859;75537;75538;76205;76206;76207;76208;76209;76210;76415;76416;76417;76418;82015;82902;82903;82904;95614;95615;95616;98847;99475;101550;101551;101552;101553;105501;117965;117966;119632;121537;125015…	14328;22466;23464;25245;30053;30059;45133;45210;46263;57135;58491;59689;64580;68520;72858;72859;75538;76205;76418;82015;82904;95614;98847;99475;101551;105501;117966;119632;121537;125016;131323;156025;156430;156685;157245;165398;169234;173780;175281;175297;176210;176885;177504	4258;4259;4260;4261	1002;1074;1615;1632	-1;-1;-1;-1;-1				COL14A1
J3QQM5;Q9BT23	J3QQM5;Q9BT23	1;1	1;1	1;1	LIM domain-containing protein 2	LIMD2	tr|J3QQM5|J3QQM5_HUMAN LIM domain-containing protein 2 (Fragment) OS=Homo sapiens OX=9606 GN=LIMD2 PE=1 SV=1;sp|Q9BT23|LIMD2_HUMAN LIM domain-containing protein 2 OS=Homo sapiens OX=9606 GN=LIMD2 PE=1 SV=1	2	1	1	1	7.3	7.3	7.3	12.013	109	109;127	0.0051755	1.4486	22562	31455	28582	17740	20829	24247	30742	24069	37106	43230	31131000	1				2264	17421	TRUE	18678	34191	45903	45903			-1;-1				LIMD2
M0R102;M0R050;Q9NQT4	M0R102;M0R050;Q9NQT4	1;1;1	1;1;1	1;1;1	Exosome complex component RRP46	EXOSC5	tr|M0R102|M0R102_HUMAN Exosome complex component RRP46 (Fragment) OS=Homo sapiens OX=9606 GN=EXOSC5 PE=1 SV=8;tr|M0R050|M0R050_HUMAN Exosome complex component RRP46 OS=Homo sapiens OX=9606 GN=EXOSC5 PE=1 SV=1;sp|Q9NQT4|EXOS5_HUMAN Exosome complex component	3	1	1	1	7.5	7.5	7.5	14.133	133	133;197;235	1	-2	9614.5	11401	9671.2	9155	8958.6	13388	11422	7233	12169	16399	12274000	1	+			2365	40039	TRUE	42952	80971	109001	109001	1616	1	-1;-1;-1				EXOSC5
P04003;A6PVY5;CON__Q28065	P04003	12;1;1	12;1;1	12;1;1	C4b-binding protein alpha chain	C4BPA	sp|P04003|C4BPA_HUMAN C4b-binding protein alpha chain OS=Homo sapiens OX=9606 GN=C4BPA PE=1 SV=2	3	12	12	12	21.3	21.3	21.3	67.033	597	597;152;610	0	36.789	316110	395350	933300	241340	524420	494110	365640	476840	325960	364660	1792900000	15				3066	7046;13122;13383;20262;27203;32074;32088;39789;42105;47751;47764;59614	True;True;True;True;True;True;True;True;True;True;True;True	7572;14069;14340;21709;29148;34373;34388;42583;45681;51741;51754;64397	14261;14262;25844;26369;39904;39905;54840;64984;65010;80246;86429;97333;97351;121056	19155;19156;34575;34576;35286;53719;53720;73674;87281;87312;108046;116111;130612;130636;162131	19156;34575;35286;53720;73674;87281;87312;108046;116111;130612;130636;162131	2222	249	-1;-1;-1				C4BPA
P24592;F8VYK9;A0A3B3IUE0;F8VVA5	P24592;F8VYK9	3;2;1;1	3;2;1;1	3;2;1;1	Insulin-like growth factor-binding protein 6	IGFBP6	sp|P24592|IBP6_HUMAN Insulin-like growth factor-binding protein 6 OS=Homo sapiens OX=9606 GN=IGFBP6 PE=1 SV=1;tr|F8VYK9|F8VYK9_HUMAN Insulin-like growth factor-binding protein 6 OS=Homo sapiens OX=9606 GN=IGFBP6 PE=1 SV=1	4	3	3	3	12.5	12.5	12.5	25.322	240	240;238;81;136	0	6.1416	68977	142800	195260	102240	137890	96683	129600	88488	118490	137170	237800000	6				3575	4316;8104;21162	True;True;True	4668;8681;22667	9001;16042;16043;41756;41757	12217;21455;21456;21457;56279;56280	12217;21455;56280			-1;-1;-1;-1				IGFBP6
Q13576;F5H7S7;E7EWC2;D6R939;E9PDT6;D6RDK8;D6R999;D6RGC6;F2Z2E2;Q86VI3	Q13576;F5H7S7;E7EWC2	26;24;23;12;11;2;1;1;1;1	24;22;21;12;10;2;1;1;0;0	24;22;21;12;10;2;1;1;0;0	Ras GTPase-activating-like protein IQGAP2	IQGAP2	sp|Q13576|IQGA2_HUMAN Ras GTPase-activating-like protein IQGAP2 OS=Homo sapiens OX=9606 GN=IQGAP2 PE=1 SV=4;tr|F5H7S7|F5H7S7_HUMAN Ras GTPase-activating-like protein IQGAP2 OS=Homo sapiens OX=9606 GN=IQGAP2 PE=1 SV=2;tr|E7EWC2|E7EWC2_HUMAN Ras GTPase-activ	10	26	24	24	17.7	16.7	16.7	180.58	1575	1575;1525;1402;824;509;167;60;110;1588;1631	0	50.255	435230	896700	631980	442870	634910	471710	488160	464520	672330	637360	1369500000	30				4622	4036;4250;4275;6534;9169;12136;19661;22787;30312;35329;37656;37838;41216;46521;47845;52869;53472;54261;55652;57520;57828;65837;65900;66293;66294;67039	True;True;True;True;True;True;True;True;True;False;True;True;False;True;True;True;True;True;True;True;True;True;True;True;True;True	4327;4599;4625;7026;9817;13020;21059;24400;32492;37822;37823;40303;40495;44719;50403;51838;57153;57820;58652;60122;62136;62463;71134;71201;71621;71622;72413	8387;8388;8887;8933;13346;18079;23983;38718;44853;61305;71551;71552;71553;71554;75991;75992;76342;84785;95039;95040;97495;107511;108640;110007;112918;116611;117138;133779;133780;133781;133902;134650;134651;136196	11420;11421;12068;12133;17987;24143;32109;52116;60355;82605;96237;96238;96239;96240;102205;102206;102649;114021;127639;127640;127641;130824;143848;145298;147024;151082;156008;156696;179183;179184;179185;179380;180374;180375;182475	11420;12068;12133;17987;24143;32109;52116;60355;82605;96237;102206;102649;114021;127639;130824;143848;145298;147024;151082;156008;156696;179185;179380;180374;180375;182475	3552;4486	120;906	-1;-1;-1;-1;-1;-1;-1;-1;-1;-1				IQGAP2
P36269;H7C1X2	P36269	9;2	9;2	9;2	Gamma-glutamyltransferase 5;Gamma-glutamyltransferase 5 heavy chain;Gamma-glutamyltransferase 5 light chain	GGT5	sp|P36269|GGT5_HUMAN Glutathione hydrolase 5 proenzyme OS=Homo sapiens OX=9606 GN=GGT5 PE=1 SV=2	2	9	9	9	18.4	18.4	18.4	62.26	586	586;220	0	40.805	600800	874710	597750	359540	505490	474100	446340	547390	728000	656200	1821500000	19				3759	9928;14305;21353;22464;34919;53706;56790;61041;63079	True;True;True;True;True;True;True;True;True	10623;15315;22869;24064;37390;37391;58066;58067;61338;65945;68189	19550;28124;28125;42086;44256;44257;70731;70732;70733;109041;109042;109043;115093;124048;128474;128475	26065;37674;37675;37676;56703;56704;59613;59614;95131;95132;95133;145807;145808;145809;145810;154022;166218;172170;172171	26065;37674;56703;59614;95133;145807;154022;166218;172171	3363;3364	243;471	-1;-1				GGT5
A0A286YEY4;P01859	A0A286YEY4;P01859	11;11	6;6	5;5	Ig gamma-2 chain C region	IGHG2	tr|A0A286YEY4|A0A286YEY4_HUMAN Immunoglobulin heavy constant gamma 2 (Fragment) OS=Homo sapiens OX=9606 GN=IGHG2 PE=1 SV=1;sp|P01859|IGHG2_HUMAN Immunoglobulin heavy constant gamma 2 OS=Homo sapiens OX=9606 GN=IGHG2 PE=1 SV=2	2	11	6	5	40.3	28.9	25.3	43.805	395	395;326	0	200.61	474080	1246300	2105200	799360	1379200	1033200	599460	886700	1016300	990080	7327700000	31				642	6774;11345;16434;16436;23437;24120;43383;54912;58156;59103;64760	True;False;False;False;True;False;False;True;True;True;True	7282;12180;12181;17636;17638;17639;25089;25842;47068;59339;62836;63844;63845;69987	13827;22498;22499;22500;22501;22502;22503;22504;22505;22506;22507;32369;32370;32371;32372;32392;32393;32394;32395;32396;32397;32398;32399;32400;32401;32402;32403;32404;32405;32406;32407;32408;32409;32410;32411;32412;32413;32414;32415;32416;46133;46134;46135;47558;47559;47560;88900;88901;88902;88903;88904;88905;111104;111105;111106;111107;111108;111109;111110;111111;111112;111113;117805;117806;119…	18630;30066;30067;30068;30069;30070;30071;30072;30073;30074;30075;30076;30077;30078;30079;30080;30081;30082;30083;30084;43391;43392;43393;43394;43395;43396;43397;43398;43399;43400;43401;43402;43403;43404;43445;43446;43447;43448;43449;43450;43451;43452;43453;43454;43455;43456;43457;43458;43459;43460;43461;43462;43463;43464;43465;43466;43467;43468;43469;43470;43471;43472;43473;43474;43475;43476;434…	18630;30068;43394;43502;62035;63977;119349;148471;157563;160554;176666	531;532	237;276	-1;-1				IGHG2
Q9Y3Z3;A0A2R8YCS7;A0A2R8YD90;A0A2R8YF51;A0A2R8Y5D2;A0A2R8Y586;A0A2R8Y7R5;A0A2R8Y755;A0A2R8YFV6;A0A2R8Y6J9;A0A2R8YG48;A0A2R8YF18	Q9Y3Z3;A0A2R8YCS7;A0A2R8YD90	24;23;15;9;9;7;6;6;6;6;5;5	24;23;15;9;9;7;6;6;6;6;5;5	24;23;15;9;9;7;6;6;6;6;5;5	Deoxynucleoside triphosphate triphosphohydrolase SAMHD1	SAMHD1	sp|Q9Y3Z3|SAMH1_HUMAN Deoxynucleoside triphosphate triphosphohydrolase SAMHD1 OS=Homo sapiens OX=9606 GN=SAMHD1 PE=1 SV=2;tr|A0A2R8YCS7|A0A2R8YCS7_HUMAN Deoxynucleoside triphosphate triphosphohydrolase SAMHD1 OS=Homo sapiens OX=9606 GN=SAMHD1 PE=1 SV=1;tr|	12	24	24	24	38.2	38.2	38.2	72.2	626	626;589;413;285;289;156;127;129;139;212;89;104	0	110.62	1208000	2322600	1803700	1130200	1910400	1436600	1475500	1362800	1452800	1591800	7602600000	56				7334	963;8029;8030;9561;13128;17822;18583;19035;19452;22409;28476;30129;36382;39295;41986;43384;46463;48338;48772;49113;51742;51743;58269;67507	True;True;True;True;True;True;True;True;True;True;True;True;True;True;True;True;True;True;True;True;True;True;True;True	1027;8601;8602;10237;10238;14075;19100;19904;20384;20836;24004;30495;32300;32301;38922;42035;42036;45557;47069;50341;52358;52811;53178;55956;55957;62953;72905	1938;1939;1940;15909;15910;15911;18908;18909;25853;34985;36528;37487;37488;38293;38294;38295;38296;44159;57565;57566;60948;60949;60950;60951;73423;73424;79135;79136;79137;86244;88906;88907;94943;94944;98480;98481;99357;99358;100105;100106;105430;105431;105432;118018;137031;137032;137033	2666;2667;2668;2669;2670;21270;21271;21272;25250;25251;34588;46972;49132;50456;50457;50458;51524;51525;51526;51527;51528;59494;59495;77615;77616;82127;82128;82129;82130;98694;98695;98696;106439;106440;106441;106442;115865;119355;119356;127521;127522;132144;132145;133220;133221;133222;134146;134147;141128;141129;141130;157857;157858;183551;183552;183553	2667;21270;21272;25250;34588;46972;49132;50458;51524;59494;77616;82127;98695;106442;115865;119356;127522;132144;133221;134146;141128;141129;157857;183551	6018;6019;6020	115;362;416	-1;-1;-1;-1;-1;-1;-1;-1;-1;-1;-1;-1				SAMHD1
CON__P04258	CON__P04258	2	1	0				1	2	1	0	1.3	0.8	0	138.44	1466	1466	0.00075953	2.6085	24680	45597	40858	32647	40660	24338	19520	15144	26867	35648	319640000	1			+	1347	20865;24146	False;True	22347;25869	41114;41115;41116;47612	55396;55397;55398;64056	55398;64056			-1
P04004;H0YJW9;CON__Q3ZBS7	P04004	6;1;1	6;1;1	6;1;1	Vitronectin;Vitronectin V65 subunit;Vitronectin V10 subunit;Somatomedin-B	VTN	sp|P04004|VTNC_HUMAN Vitronectin OS=Homo sapiens OX=9606 GN=VTN PE=1 SV=1	3	6	6	6	14.4	14.4	14.4	54.305	478	478;148;484	0	12.092	195310	384610	428550	195850	196620	215440	183600	205830	264130	295880	899620000	12				3067	6337;11840;24402;30798;50223;52279	True;True;True;True;True;True	6818;12703;12704;26141;33008;33009;54353;56532	13011;13012;13013;23370;23371;48079;62219;62220;62221;102510;106451	17551;17552;17553;31227;31228;64679;83807;83808;83809;83810;137142;142439	17553;31227;64679;83810;137142;142439	2223;2224	350;359	-1;-1;-1				VTN
Q9NSD5;F5H6S9;F5GZA5	Q9NSD5;F5H6S9;F5GZA5	3;2;2	2;1;1	2;1;1	Sodium- and chloride-dependent GABA transporter 2;Transporter	SLC6A13	sp|Q9NSD5|S6A13_HUMAN Sodium- and chloride-dependent GABA transporter 2 OS=Homo sapiens OX=9606 GN=SLC6A13 PE=1 SV=3;tr|F5H6S9|F5H6S9_HUMAN Transporter OS=Homo sapiens OX=9606 GN=SLC6A13 PE=1 SV=1;tr|F5GZA5|F5GZA5_HUMAN Sodium- and chloride-dependent GABA	3	3	2	2	4	2.8	2.8	68.008	602	602;123;150	0.0003059	2.7142	80561	196620	126230	68037	74471	60033	57368	73063	59912	69816	76208000	3				6819	20047;31234;67411	False;True;True	21481;33470;72805	39489;39490;63161;63162;136876	53176;53177;53178;53179;53180;84994;84995;183350	53176;84994;183350			-1;-1;-1				SLC6A13
Q5VYS8;Q5VYS9;X6R3Q3	Q5VYS8;Q5VYS9;X6R3Q3	2;1;1	2;1;1	2;1;1	Terminal uridylyltransferase 7	ZCCHC6	sp|Q5VYS8|TUT7_HUMAN Terminal uridylyltransferase 7 OS=Homo sapiens OX=9606 GN=TUT7 PE=1 SV=1;tr|Q5VYS9|Q5VYS9_HUMAN Terminal uridylyltransferase 7 OS=Homo sapiens OX=9606 GN=TUT7 PE=1 SV=1;tr|X6R3Q3|X6R3Q3_HUMAN Terminal uridylyltransferase 7 OS=Homo sapi	3	2	2	2	1.3	1.3	1.3	171.23	1495	1495;168;784	0.0013337	2.2862	13035	16932	8454.8	6308.5	11071	8718.8	8374.8	11147	14313	6566	414320000	2				5126	8032;8696	True;True	8604;9312	15918;17130	21281;22865	21281;22865			-1;-1;-1				ZCCHC6
V9GYE3;V9GYG9;V9GYM3;P02652;V9GYC1;V9GYS1	V9GYE3;V9GYG9;V9GYM3;P02652;V9GYC1;V9GYS1	3;3;3;3;2;2	3;3;3;3;2;2	3;3;3;3;2;2	Apolipoprotein A-II;Proapolipoprotein A-II;Truncated apolipoprotein A-II	APOA2	tr|V9GYE3|V9GYE3_HUMAN Apolipoprotein A-II OS=Homo sapiens OX=9606 GN=APOA2 PE=1 SV=1;tr|V9GYG9|V9GYG9_HUMAN Apolipoprotein A-II (Fragment) OS=Homo sapiens OX=9606 GN=APOA2 PE=1 SV=1;tr|V9GYM3|V9GYM3_HUMAN Apolipoprotein A-II OS=Homo sapiens OX=9606 GN=APO	6	3	3	3	36.5	36.5	36.5	5.8767	52	52;95;133;100;66;82	0	5.9789	144450	431220	425590	300030	288910	123620	157790	111590	332440	357960	3992600000	9				3034	16703;53532;62113	True;True;True	17917;57882;67103	32885;108740;108741;126426;126427;126428;126429	44123;145426;145427;145428;169438;169439;169440;169441;169442	44123;145426;169440			-1;-1;-1;-1;-1;-1				APOA2
E9PCT3;P51636	E9PCT3;P51636	1;1	1;1	1;1	Caveolin;Caveolin-2	CAV2	tr|E9PCT3|E9PCT3_HUMAN Caveolin OS=Homo sapiens OX=9606 GN=CAV2 PE=1 SV=1;sp|P51636|CAV2_HUMAN Caveolin-2 OS=Homo sapiens OX=9606 GN=CAV2 PE=1 SV=2	2	1	1	1	10.6	10.6	10.6	12.953	113	113;162	0.00015911	3.3134	5195.8	13592	11421	7253.6	8693.7	5943.1	5524.3	5430	8202.4	9316.8	56208000	1				1581	18561	TRUE	19881	36492	49088	49088			-1;-1				CAV2
P54253	P54253	1	1	1	Ataxin-1	ATXN1	sp|P54253|ATX1_HUMAN Ataxin-1 OS=Homo sapiens OX=9606 GN=ATXN1 PE=1 SV=2	1	1	1	1	1.2	1.2	1.2	86.922	815	815	0.0067839	1.3296	146720	136290	129510	64890	100540	78930	82603	102760	98748	136050	455040000	3				4087	12621	TRUE	13538	24951;24952	33362;33363;33364	33363			-1				ATXN1
O94911	O94911	17	1	1	ATP-binding cassette sub-family A member 8	ABCA8	sp|O94911|ABCA8_HUMAN ATP-binding cassette sub-family A member 8 OS=Homo sapiens OX=9606 GN=ABCA8 PE=1 SV=3	1	17	1	1	12.3	1.4	1.4	179.24	1581	1581	0.005571	1.4142	1997.9	3443.6	2945.9	2612.1	3774.7	3201.9	2818.2	2094.6	3524.6	2577.4	45820000	2				2850	11961;18039;21070;21370;22077;24820;26693;38091;42510;45969;54271;54336;57996;59984;60141;61182;61995	False;False;False;False;False;False;False;False;False;False;True;False;False;False;False;False;False	12832;19333;22570;22889;23647;26579;28608;40756;46110;49828;58662;58663;58730;62669;64803;64979;66095;66971	23619;35507;41569;42123;43531;43532;48827;48828;53554;76912;87189;87190;87191;93961;110033;110034;110139;117508;121864;121865;122232;124340;124341;126176;126177	31547;47756;56011;56749;58673;58674;65643;65644;71967;103487;117080;117081;117082;117083;126187;147061;147062;147214;157170;163209;163210;163741;166603;166604;169113;169114	31547;47756;56011;56749;58674;65643;71967;103487;117080;126187;147061;147214;157170;163210;163741;166603;169113	1992	1220	-1				ABCA8
O95271;E7EWY6;E7EQ52;E5RHD2;Q9H2K2	O95271;E7EWY6;E7EQ52	3;2;2;1;1	3;2;2;1;1	3;2;2;1;1	Tankyrase-1	TNKS	sp|O95271|TNKS1_HUMAN Poly [ADP-ribose] polymerase tankyrase-1 OS=Homo sapiens OX=9606 GN=TNKS PE=1 SV=2;tr|E7EWY6|E7EWY6_HUMAN Poly [ADP-ribose] polymerase tankyrase-1 OS=Homo sapiens OX=9606 GN=TNKS PE=1 SV=1;tr|E7EQ52|E7EQ52_HUMAN Poly [ADP-ribose] poly	5	3	3	3	2.9	2.9	2.9	142.04	1327	1327;617;1090;243;1166	0	5.7021	44705	73927	53255	27124	41164	39255	24303	57844	114640	36963	695290000	4				2885	10447;15499;43261	True;True;True	11231;16578;46933	20748;30559;88656	27718;40956;40957;119018	27718;40957;119018			-1;-1;-1;-1;-1				TNKS
H7C556;D3YTG3;Q7Z7G0;Q5JPC9;H0Y897;E9PPR9;H0YEA0	H7C556;D3YTG3;Q7Z7G0;Q5JPC9	7;7;7;4;3;2;2	7;7;7;4;3;2;2	7;7;7;4;3;2;2	Target of Nesh-SH3	ABI3BP;DKFZp667H216	tr|H7C556|H7C556_HUMAN Target of Nesh-SH3 OS=Homo sapiens OX=9606 GN=ABI3BP PE=1 SV=2;tr|D3YTG3|D3YTG3_HUMAN Target of Nesh-SH3 OS=Homo sapiens OX=9606 GN=ABI3BP PE=1 SV=1;sp|Q7Z7G0|TARSH_HUMAN Target of Nesh-SH3 OS=Homo sapiens OX=9606 GN=ABI3BP PE=1 SV=1	7	7	7	7	6.7	6.7	6.7	135.34	1229	1229;1777;1075;1005;1131;161;191	0	18.569	158150	391810	257880	121340	154040	159910	107230	187830	194110	217100	306480000	10				1371	10443;19756;20492;20810;56874;66478;66669	True;True;True;True;True;True;True	11227;21157;21946;22288;61429;71814;72012	20744;38877;40408;40409;40410;41030;115235;134996;135509	27714;52327;54465;54466;54467;54468;55287;154212;180826;181516	27714;52327;54467;55287;154212;180826;181516			-1;-1;-1;-1;-1;-1;-1				ABI3BP;DKFZp667H216
P02750	P02750	6	6	6	Leucine-rich alpha-2-glycoprotein	LRG1	sp|P02750|A2GL_HUMAN Leucine-rich alpha-2-glycoprotein OS=Homo sapiens OX=9606 GN=LRG1 PE=1 SV=2	1	6	6	6	15.6	15.6	15.6	38.177	347	347	0	11.987	108880	204670	346230	88285	242200	178870	235830	222150	111390	110320	725980000	11				3047	3476;9941;24017;24370;35127;59772	True;True;True;True;True;True	3715;10638;25739;26109;37608;64573	7246;7247;7248;19571;19572;47421;48034;71121;71122;121368	9922;9923;9924;26088;26089;26090;63789;64621;95626;95627;162537	9922;26090;63789;64621;95626;162537			-1				LRG1
Q9BRT6	Q9BRT6	1	1	1	Protein LLP homolog	LLPH	sp|Q9BRT6|LLPH_HUMAN Protein LLP homolog OS=Homo sapiens OX=9606 GN=LLPH PE=1 SV=1	1	1	1	1	10.9	10.9	10.9	15.225	129	129	0.0054401	1.4204	2752.4	3331	4304.2	1794.6	2345.2	2595.6	2155.9	2775.3	3526	9362.9	27014000	1				6361	11713	TRUE	12568	23159	30955	30955			-1				LLPH
G3V470;G3V2A4;G3V5X7;Q99973	G3V470;G3V2A4;G3V5X7;Q99973	1;1;1;1	1;1;1;1	1;1;1;1	Telomerase protein component 1	TEP1	tr|G3V470|G3V470_HUMAN Telomerase protein component 1 OS=Homo sapiens OX=9606 GN=TEP1 PE=1 SV=1;tr|G3V2A4|G3V2A4_HUMAN Telomerase protein component 1 OS=Homo sapiens OX=9606 GN=TEP1 PE=1 SV=1;tr|G3V5X7|G3V5X7_HUMAN Telomerase protein component 1 OS=Homo sa	4	1	1	1	0.8	0.8	0.8	166.94	1481	1481;1904;2519;2627	0.0086408	1.1924	1645.3	6388.5	2249.3	3535.3	2562	4758.5	3003	1311	1667.5	4854.3	2617300	1				1880	50959	TRUE	55130	104061	139314	139314			-1;-1;-1;-1				TEP1
A0A087X1J7;P22352;H0YBE4;E5RG32;H0YC19;A0A087X0K3;P59796;O75715	A0A087X1J7;P22352;H0YBE4	3;3;2;1;1;1;1;1	3;3;2;1;1;1;1;1	3;3;2;1;1;1;1;1	Glutathione peroxidase;Glutathione peroxidase 3	GPX3	tr|A0A087X1J7|A0A087X1J7_HUMAN Glutathione peroxidase OS=Homo sapiens OX=9606 GN=GPX3 PE=1 SV=1;sp|P22352|GPX3_HUMAN Glutathione peroxidase 3 OS=Homo sapiens OX=9606 GN=GPX3 PE=1 SV=2;tr|H0YBE4|H0YBE4_HUMAN Glutathione peroxidase 3 (Fragment) OS=Homo sapie	8	3	3	3	17.3	17.3	17.3	25.402	225	225;226;79;138;174;220;221;221	0	20.314	84586	161200	214310	81241	155980	118350	112320	123790	95381	93565	274450000	7				207	21671;43459;45441	True;True;True	23211;47150;49267	42672;89094;92927;92928	57493;119619;119620;124841;124842;124843;124844	57493;119619;124844			-1;-1;-1;-1;-1;-1;-1;-1				GPX3
Q9H1K4	Q9H1K4	6	3	3	Mitochondrial glutamate carrier 2	SLC25A18	sp|Q9H1K4|GHC2_HUMAN Mitochondrial glutamate carrier 2 OS=Homo sapiens OX=9606 GN=SLC25A18 PE=1 SV=1	1	6	3	3	19.4	10.2	10.2	33.848	315	315	0	15.458	110530	110570	104390	59690	112560	125200	112420	114220	122640	97518	916510000	5				6572	20887;23290;29663;32627;37576;57018	False;True;False;False;True;True	22371;24933;31778;34957;40219;61589	41157;41158;45867;59998;66080;66081;66082;75881;75882;115563;115564	55457;55458;55459;55460;61715;80906;88643;88644;88645;88646;102075;102076;154627;154628	55457;61715;80906;88646;102076;154627			-1				SLC25A18
P02730;A0A0A0MS98	P02730;A0A0A0MS98	21;13	21;13	21;13	Band 3 anion transport protein	SLC4A1	sp|P02730|B3AT_HUMAN Band 3 anion transport protein OS=Homo sapiens OX=9606 GN=SLC4A1 PE=1 SV=3;tr|A0A0A0MS98|A0A0A0MS98_HUMAN Band 3 anion transport protein OS=Homo sapiens OX=9606 GN=SLC4A1 PE=1 SV=1	2	21	21	21	23.3	23.3	23.3	101.79	911	911;545	0	170.41	1106000	1286300	1374200	1003800	2281500	1454900	1240800	1224000	1479700	1048000	8273600000	65				3040	103;5446;5447;5636;19410;19411;25494;26763;26764;27442;28044;29485;37296;38436;43839;44277;59714;65542;66365;67138;67139	True;True;True;True;True;True;True;True;True;True;True;True;True;True;True;True;True;True;True;True;True	105;106;5865;5866;6076;6077;20792;20793;27301;28681;28682;29400;29401;30033;31594;39919;41121;47560;48024;64508;64509;70819;71697;72514;72515	160;161;162;11212;11213;11214;11215;11660;11661;11662;11663;11664;11665;11666;38221;38222;38223;38224;50367;50368;50369;53842;53843;53844;53845;53846;55253;55254;56355;56356;59642;75335;77559;89797;90602;121280;121281;121282;121283;133233;134773;134774;136367;136368;136369;136370	203;204;205;15126;15127;15128;15129;15130;15726;15727;15728;15729;15730;15731;15732;15733;15734;15735;51432;51433;51434;51435;51436;51437;67823;67824;67825;72392;72393;72394;72395;72396;72397;72398;74207;74208;75720;75721;75722;75723;80364;80365;80366;101346;104371;104372;104373;120543;120544;120545;121596;162429;162430;162431;162432;178455;180523;180524;180525;180526;182703;182704;182705;182706;…	205;15126;15129;15735;51432;51436;67824;72392;72397;74207;75721;80365;101346;104371;120543;121596;162432;178455;180524;182703;182704	2203;2204;2205	289;559;909	-1;-1				SLC4A1
Q9UI17;Q8TCC6	Q9UI17;Q8TCC6	5;3	5;3	5;3	Dimethylglycine dehydrogenase, mitochondrial	DMGDH	sp|Q9UI17|M2GD_HUMAN Dimethylglycine dehydrogenase, mitochondrial OS=Homo sapiens OX=9606 GN=DMGDH PE=1 SV=2;tr|Q8TCC6|Q8TCC6_HUMAN DMGDH protein (Fragment) OS=Homo sapiens OX=9606 GN=DMGDH PE=1 SV=1	2	5	5	5	6.9	6.9	6.9	96.81	866	866;613	0	14.26	90538	105110	117300	83148	225500	74329	102740	95645	104650	88593	86369000	5				7090	8918;9757;33812;36726;65514	True;True;True;True;True	9547;10442;36225;39329;70788	17611;19257;68628;74215;133182	23541;25684;92226;99745;178398	23541;25684;92226;99745;178398			-1;-1				DMGDH
Q9Y613	Q9Y613	3	3	3	FH1/FH2 domain-containing protein 1	FHOD1	sp|Q9Y613|FHOD1_HUMAN FH1/FH2 domain-containing protein 1 OS=Homo sapiens OX=9606 GN=FHOD1 PE=1 SV=3	1	3	3	3	2.8	2.8	2.8	126.55	1164	1164	0.00016239	3.6257	27108	54041	70593	48276	53945	33487	34612	22584	50669	56084	108460000	3				7396	33748;58458;62883	True;True;True	36155;63154;67974	68353;118558;128002	91720;158795;171527	91720;158795;171527			-1				FHOD1
A0A087X0D5;P09668;E9PKT6;A0A3B3IRM7	A0A087X0D5;P09668;E9PKT6	3;3;2;1	3;3;2;1	3;3;2;1	Pro-cathepsin H;Cathepsin H mini chain;Cathepsin H;Cathepsin H heavy chain;Cathepsin H light chain	CTSH	tr|A0A087X0D5|A0A087X0D5_HUMAN Pro-cathepsin H OS=Homo sapiens OX=9606 GN=CTSH PE=1 SV=1;sp|P09668|CATH_HUMAN Pro-cathepsin H OS=Homo sapiens OX=9606 GN=CTSH PE=1 SV=4;tr|E9PKT6|E9PKT6_HUMAN Pro-cathepsin H (Fragment) OS=Homo sapiens OX=9606 GN=CTSH PE=1 S	4	3	3	3	10.5	10.5	10.5	36.269	323	323;335;134;159	0	30.987	218770	144550	127180	119030	135160	147220	142790	125960	205540	149890	630030000	8				183	22930;23752;62940	True;True;True	24554;24555;25457;68039	45150;45151;45152;46901;46902;128125;128126	60781;60782;60783;60784;63117;63118;171688;171689	60784;63117;171689	156	188	-1;-1;-1;-1				CTSH
P02549	P02549	64	64	64	Spectrin alpha chain, erythrocytic 1	SPTA1	sp|P02549|SPTA1_HUMAN Spectrin alpha chain, erythrocytic 1 OS=Homo sapiens OX=9606 GN=SPTA1 PE=1 SV=5	1	64	64	64	28.8	28.8	28.8	280.01	2419	2419	0	323.31	1558000	1955400	1964900	1412200	2894700	2060100	1808100	1700000	1995400	1462400	8770400000	110				3031	753;1380;3027;3820;4801;5095;6580;7181;9659;9997;10050;10165;10961;12143;13004;13891;14983;14984;14987;16549;17192;17521;17756;18924;19576;19577;19717;25023;25663;25830;25858;25909;26051;27650;31839;32652;32853;33018;34661;35333;36575;36956;39533;40112;40853;41122;42515;44815;45161;48805;48999;49202;49928;50031;54415;55364;60636;61863;62297;62783;62959;63954;64186;64535	True;True;True;True;True;True;True;True;True;True;True;True;True;True;True;True;True;True;True;True;True;True;True;True;True;True;True;True;True;True;True;True;True;True;True;True;True;True;True;True;True;True;True;True;True;True;True;True;True;True;True;True;True;True;True;True;True;True;True;True;True;True;True;True	800;1474;3239;4075;5180;5490;7076;7708;10339;10705;10759;10881;11772;11773;13028;13941;14869;16041;16042;16045;17756;18426;18783;19030;20268;20970;20971;21117;26793;27483;27665;27696;27753;27902;29615;34122;34984;35201;35379;37118;37827;39157;39565;42288;43058;44134;44135;44563;46115;48584;48963;52846;53052;53271;54041;54145;58814;58815;59814;65504;66827;67302;67824;68058;69124;69369;69747	1462;2828;6385;7862;9941;10579;13437;13438;14458;19091;19683;19780;19781;20022;21682;21683;23997;25619;27231;29592;29593;29606;29607;29608;29609;29610;32610;33759;34352;34820;37276;37277;38530;38531;38816;38817;49279;50692;51135;51136;51137;51138;51255;51256;51427;51756;55593;55594;64564;66120;66565;66566;66930;66931;70201;70202;71564;73923;73924;74598;79645;81156;81157;83397;83398;83399;83400;83…	1987;1988;3910;8738;10701;13479;14338;18109;18110;19397;25480;25481;26228;26358;26359;26729;28951;28952;32125;34276;36399;39632;39633;39634;39652;39653;39654;39655;39656;43770;45291;45292;46094;46095;46714;46715;46716;50173;50174;50175;50176;51827;51828;52250;52251;52252;66288;68237;68825;68826;68827;68828;68957;68958;69180;69603;74658;74659;74660;86762;88690;89299;89300;89777;89778;89779;94407;9…	1988;3910;8738;10701;13479;14338;18110;19397;25481;26228;26358;26729;28952;32125;34276;36399;39633;39634;39653;43770;45292;46095;46716;50173;51827;51828;52252;66288;68237;68825;68958;69180;69603;74659;86762;88690;89299;89777;94408;96253;99379;100235;107194;109231;112195;113337;117090;122815;123872;133313;133850;134346;136307;136548;147379;149694;165107;168674;169892;171195;171743;174234;174744;17…	2177;2178;2179;2180;2181;2182	492;859;983;1265;1433;2252	-1				SPTA1
P02765;C9JV77	P02765;C9JV77	6;5	6;5	4;4	Alpha-2-HS-glycoprotein;Alpha-2-HS-glycoprotein chain A;Alpha-2-HS-glycoprotein chain B	AHSG	sp|P02765|FETUA_HUMAN Alpha-2-HS-glycoprotein OS=Homo sapiens OX=9606 GN=AHSG PE=1 SV=2;tr|C9JV77|C9JV77_HUMAN Alpha-2-HS-glycoprotein OS=Homo sapiens OX=9606 GN=AHSG PE=1 SV=1	2	6	6	4	15.8	15.8	10.4	39.34	367	367;368	0	20.401	375310	720350	505760	452500	236070	215330	351920	190090	533050	651750	2170300000	12				3052	6842;7252;12642;14413;20450;26857	True;True;True;True;True;True	7355;7786;13559;15431;21903;28780	13939;14570;14571;24984;28381;28382;40250;54052;54053	18765;19536;19537;33410;38009;38010;54186;54187;72659;72660;72661;72662	18765;19536;33410;38010;54186;72660			-1;-1				AHSG
Q13009;A0A1B0GW57;H7C079;E9PKT1;E9PMZ8;Q8IVF5	Q13009;A0A1B0GW57	6;4;2;1;1;1	6;4;2;1;1;1	6;4;2;1;1;1	T-lymphoma invasion and metastasis-inducing protein 1	TIAM1	sp|Q13009|TIAM1_HUMAN T-lymphoma invasion and metastasis-inducing protein 1 OS=Homo sapiens OX=9606 GN=TIAM1 PE=1 SV=2;tr|A0A1B0GW57|A0A1B0GW57_HUMAN T-lymphoma invasion and metastasis-inducing protein 1 OS=Homo sapiens OX=9606 GN=TIAM1 PE=1 SV=1	6	6	6	6	4.4	4.4	4.4	177.51	1591	1591;624;132;1045;1367;1701	0	14.317	179480	284800	224440	164480	199930	177590	141570	139300	180970	210860	5243700000	7				4534	17514;20519;40260;51545;56460;60129	True;True;True;True;True;True	18776;21974;43263;55749;60987;64967	34343;40452;81574;81575;105117;114434;122217	46083;54520;109784;109785;140715;153119;163725	46083;54520;109785;140715;153119;163725	4419;4420	583;586	-1;-1;-1;-1;-1;-1				TIAM1
E9PHG5;Q6UW02;F8WBE2;C9J8K7;Q8WZ13	E9PHG5;Q6UW02;F8WBE2;C9J8K7	3;3;2;2;1	3;3;2;2;1	3;3;2;2;1	Cytochrome P450 20A1	CYP20A1	tr|E9PHG5|E9PHG5_HUMAN Cytochrome P450 20A1 OS=Homo sapiens OX=9606 GN=CYP20A1 PE=1 SV=1;sp|Q6UW02|CP20A_HUMAN Cytochrome P450 20A1 OS=Homo sapiens OX=9606 GN=CYP20A1 PE=1 SV=1;tr|F8WBE2|F8WBE2_HUMAN Cytochrome P450 20A1 OS=Homo sapiens OX=9606 GN=CYP20A1	5	3	3	3	6.2	6.2	6.2	53.448	470	470;462;208;258;192	0	7.5708	54399	147820	68159	64951	115430	59393	58532	66780	98340	65087	69534000	4				1619	38769;45957;53341	True;True;True	41480;49815;57685	78173;93928;93929;108380	105181;126145;126146;144962	105181;126146;144962			-1;-1;-1;-1;-1				CYP20A1
Q5W111	Q5W111	3	3	3	SPRY domain-containing protein 7	SPRYD7	sp|Q5W111|SPRY7_HUMAN SPRY domain-containing protein 7 OS=Homo sapiens OX=9606 GN=SPRYD7 PE=1 SV=2	1	3	3	3	19.9	19.9	19.9	21.666	196	196	0	9.7674	84878	55584	133600	59951	82180	64675	63884	58659	57139	46382	106260000	4				5136	27394;41572;62985	True;True;True	29350;45123;68084	55173;85521;85522;128216	74097;114922;114923;171810	74097;114923;171810			-1				SPRYD7
I3L257;I3L2E1	I3L257;I3L2E1	1;1	1;1	1;1		CLUAP1	tr|I3L257|I3L257_HUMAN Clusterin-associated protein 1 OS=Homo sapiens OX=9606 GN=CLUAP1 PE=4 SV=1;tr|I3L2E1|I3L2E1_HUMAN Clusterin-associated protein 1 OS=Homo sapiens OX=9606 GN=CLUAP1 PE=4 SV=1	2	1	1	1	20	20	20	4.1978	35	35;41	0.0027162	1.726	17586	40088	23911	13379	19329	23818	11388	27106	48768	24556	61292000	2				2178	38915	TRUE	41634	78424	105505;105506	105505			-1;-1				CLUAP1
Q9H4B7;CON__ENSEMBL:ENSBTAP00000025008	Q9H4B7;CON__ENSEMBL:ENSBTAP00000025008	7;6	1;0	1;0	Tubulin beta-1 chain	TUBB1	sp|Q9H4B7|TBB1_HUMAN Tubulin beta-1 chain OS=Homo sapiens OX=9606 GN=TUBB1 PE=1 SV=1;	2	7	1	1	11.1	2.7	2.7	50.326	451	451;536	0.00016781	4.2188	16662	34820	58795	21403	21815	26731	17670	21992	21326	21658	46973000	1			+	6621	17872;20011;20012;29816;31844;33156;60185	True;False;False;False;False;False;False	19153;21444;21445;31941;34127;35527;35528;65029	35218;39405;39406;39407;39408;39409;39410;39411;39412;39413;39414;39415;39416;39417;39418;39419;39420;39421;39422;39423;39424;39425;39426;39427;39428;60281;60282;60283;60284;60285;60286;60287;60288;60289;60290;60291;60292;60293;64577;67202;67203;67204;67205;67206;67207;67208;67209;67210;67211;67212;67213;67214;67215;67216;67217;67218;67219;67220;67221;67222;67223;67224;67225;67226;67227;67228;672…	47372;53036;53037;53038;53039;53040;53041;53042;53043;53044;53045;53046;53047;53048;53049;53050;53051;53052;53053;53054;53055;53056;53057;53058;53059;53060;53061;53062;53063;53064;53065;53066;53067;53068;53069;53070;53071;53072;53073;53074;53075;53076;53077;53078;53079;53080;53081;53082;53083;53084;53085;53086;53087;53088;53089;53090;53091;53092;53093;53094;53095;81284;81285;81286;81287;81288;812…	47372;53041;53074;81295;86785;90194;163874	2247	257	-1;-1				TUBB1
P52756;REV__P52756	P52756	4;1	3;1	3;1	RNA-binding protein 5	RBM5	sp|P52756|RBM5_HUMAN RNA-binding protein 5 OS=Homo sapiens OX=9606 GN=RBM5 PE=1 SV=2	2	4	3	3	4.8	3.6	3.6	92.153	815	815;815	0.00016692	4.127	113230	245620	133420	105670	130890	110400	117590	117800	164890	185150	1352300000	4				4051	20999;45588;57156;66235	True;True;True;False	22493;49423;61738;71556	41428;41429;93203;115866;134540	55822;55823;125195;155033;180238	55823;125195;155033;180238			-1;-1				RBM5
A0A4V7I447;Q0VD83	A0A4V7I447;Q0VD83	7;7	7;7	7;7	Apolipoprotein B receptor	APOBR	tr|A0A4V7I447|A0A4V7I447_HUMAN Apolipoprotein B receptor OS=Homo sapiens OX=9606 GN=APOBR PE=1 SV=1;sp|Q0VD83|APOBR_HUMAN Apolipoprotein B receptor OS=Homo sapiens OX=9606 GN=APOBR PE=1 SV=3	2	7	7	7	10.1	10.1	10.1	114.87	1088	1088;1097	0	22.279	71706	128890	74759	38839	54787	61167	49325	83246	113990	96509	257390000	13				856	12543;17455;30500;45495;55309;56202;60650	True;True;True;True;True;True;True	13456;18713;32686;49323;59755;60714;65524	24792;24793;34247;61642;93036;93037;93038;93039;111913;113976;113977;123266	33155;33156;45968;83052;124992;124993;124994;124995;149547;152536;152537;152538;165166	33155;45968;83052;124993;149547;152536;165166			-1;-1				APOBR
P01011;G3V595;G3V3A0;A0A087WY93	P01011;G3V595	13;9;6;2	13;9;6;2	13;9;6;2	Alpha-1-antichymotrypsin;Alpha-1-antichymotrypsin His-Pro-less	SERPINA3	sp|P01011|AACT_HUMAN Alpha-1-antichymotrypsin OS=Homo sapiens OX=9606 GN=SERPINA3 PE=1 SV=2;tr|G3V595|G3V595_HUMAN Alpha-1-antichymotrypsin (Fragment) OS=Homo sapiens OX=9606 GN=SERPINA3 PE=1 SV=3	4	13	13	13	24.8	24.8	24.8	47.65	423	423;305;205;46	0	283.26	386950	1435500	1345300	342450	1612000	1146600	789630	1301300	731400	713250	7398100000	31				2998	1114;8349;14667;16697;16698;16699;31893;35418;39569;40062;42517;49596;65446	True;True;True;True;True;True;True;True;True;True;True;True;True	1192;8934;15707;17911;17912;17913;34177;37921;42324;42989;46117;53682;70714	2314;16488;28915;28916;32877;32878;32879;32880;64659;71724;71725;79705;79706;81030;87199;87200;101146;101147;101148;101149;101150;133078;133079	3190;3191;3192;22034;38682;38683;38684;44114;44115;44116;44117;44118;86877;86878;96471;96472;96473;107276;107277;109067;117092;117093;135430;135431;135432;135433;135434;135435;135436;178268;178269	3191;22034;38684;44114;44117;44118;86877;96473;107276;109067;117092;135432;178268			-1;-1;-1;-1				SERPINA3
Q9NY15	Q9NY15	4	4	4	Stabilin-1	STAB1	sp|Q9NY15|STAB1_HUMAN Stabilin-1 OS=Homo sapiens OX=9606 GN=STAB1 PE=1 SV=3	1	4	4	4	1.6	1.6	1.6	275.48	2570	2570	0	6.3474	55307	77597	66046	42410	64341	60612	57585	60805	86059	43699	65092000	4				6915	7505;10702;17105;50724	True;True;True;True	8048;11501;18334;54879	14971;21190;33604;103514	20036;28295;45078;138488	20036;28295;45078;138488			-1				STAB1
Q8N5I4;C9JB06	Q8N5I4	3;1	3;1	3;1	Dehydrogenase/reductase SDR family member on chromosome X	DHRSX	sp|Q8N5I4|DHRSX_HUMAN Dehydrogenase/reductase SDR family member on chromosome X OS=Homo sapiens OX=9606 GN=DHRSX PE=1 SV=2	2	3	3	3	11.8	11.8	11.8	36.443	330	330;232	0	21.47	50583	87248	65904	53424	52224	48270	53850	42297	75179	53204	114200000	6				5655	34863;37648;59996	True;True;True	37331;40295;64817	70607;70608;75979;121885;121886	94937;94938;94939;102191;163233;163234	94939;102191;163234			-1;-1				DHRSX
P51888	P51888	15	15	15	Prolargin	PRELP	sp|P51888|PRELP_HUMAN Prolargin OS=Homo sapiens OX=9606 GN=PRELP PE=1 SV=1	1	15	15	15	40.1	40.1	40.1	43.809	382	382	0	111.72	1373300	2679300	2178600	1010600	1761500	1315100	1118100	1643800	1577000	1747300	32651000000	97				4035	12804;27926;30125;30126;32505;33986;34087;36997;38035;42698;43304;51764;63268;63303;65280	True;True;True;True;True;True;True;True;True;True;True;True;True;True;True	13729;29911;32295;32296;34831;36406;36516;39606;39607;40699;46314;46315;46977;55980;68392;68428;70532	25263;25264;25265;56144;56145;60936;60937;60938;60939;60940;65840;65841;65842;65843;65844;65845;65846;65847;65848;68930;68931;68932;68933;69096;69097;74672;74673;76819;76820;76821;76822;76823;76824;76825;76826;87604;87605;87606;87607;87608;87609;87610;87611;87612;88719;88720;88721;88722;105479;105480;105481;128845;128846;128919;128920;132767	33782;33783;33784;33785;33786;33787;75451;75452;75453;75454;82113;82114;82115;82116;82117;82118;88319;88320;88321;88322;88323;88324;88325;88326;88327;88328;88329;88330;88331;88332;88333;88334;88335;88336;88337;88338;88339;88340;92637;92638;92639;92640;92641;92642;92643;92841;92842;100333;100334;103360;103361;103362;103363;103364;103365;103366;103367;103368;103369;103370;117619;117620;117621;11762…	33784;75452;82113;82118;88321;92640;92842;100333;103364;117629;119092;141191;172686;172807;177861	3755;3756	157;224	-1				PRELP
Q6IMN6;F5H142;H3BM22	Q6IMN6;F5H142;H3BM22	4;3;3	4;3;3	4;3;3	Caprin-2	CAPRIN2	sp|Q6IMN6|CAPR2_HUMAN Caprin-2 OS=Homo sapiens OX=9606 GN=CAPRIN2 PE=1 SV=1;tr|F5H142|F5H142_HUMAN Caprin-2 (Fragment) OS=Homo sapiens OX=9606 GN=CAPRIN2 PE=1 SV=1;tr|H3BM22|H3BM22_HUMAN Caprin-2 (Fragment) OS=Homo sapiens OX=9606 GN=CAPRIN2 PE=1 SV=1	3	4	4	4	3.9	3.9	3.9	125.92	1127	1127;702;706	0	8.9449	34289	29155	35168	94419	42830	35284	40737	40730	46497	35074	47946000	5				5185	15002;21046;54834;55308	True;True;True;True	16062;22545;59253;59754	29646;41535;110967;111911;111912	39695;55970;148291;149545;149546	39695;55970;148291;149546			-1;-1;-1				CAPRIN2
A0A096LNZ9;A0A096LPJ4;P05161	A0A096LNZ9;A0A096LPJ4;P05161	2;2;2	2;2;2	2;2;2	Ubiquitin-like protein ISG15	ISG15	tr|A0A096LNZ9|A0A096LNZ9_HUMAN Ubiquitin-like protein ISG15 (Fragment) OS=Homo sapiens OX=9606 GN=ISG15 PE=1 SV=6;tr|A0A096LPJ4|A0A096LPJ4_HUMAN Ubiquitin-like protein ISG15 OS=Homo sapiens OX=9606 GN=ISG15 PE=1 SV=1;sp|P05161|ISG15_HUMAN Ubiquitin-like pr	3	2	2	2	11.2	11.2	11.2	15.562	143	143;157;165	0.00090827	2.5498	15859	16760	11541	17946	12883	11776	22739	35360	13621	15119	369690000	3				232	28309;54640	True;True	30312;59049	56872;56873;110626	76433;76434;147831	76434;147831			-1;-1;-1				ISG15
REV__F5H1I4;REV__Q8NG08	REV__F5H1I4;REV__Q8NG08	2;2	2;2	2;2			tr|F5H1I4|F5H1I4_HUMAN DNA helicase B OS=Homo sapiens OX=9606 GN=HELB PE=1 SV=1;sp|Q8NG08|HELB_HUMAN DNA helicase B OS=Homo sapiens OX=9606 GN=HELB PE=1 SV=2	2	2	2	2	0	0	0	96.407	846	846;1087	0.0031352	1.6775	70062	70419	72657	78866	68756	63320	73477	166350	70388	191420	62593000	2		+		7486	13274;46031	True;True	14229;49895	26150;94093	34997;126351	34997;126351			-1;-1
P23378;A0A1W2PP74;A0A1W2PPB1;A0A1W2PQV3;A0A1W2PPK8;A0A1W2PQU6;A0A1W2PPE1	P23378;A0A1W2PP74;A0A1W2PPB1;A0A1W2PQV3	9;7;6;6;1;1;1	9;7;6;6;1;1;1	9;7;6;6;1;1;1	Glycine dehydrogenase (decarboxylating), mitochondrial	GLDC	sp|P23378|GCSP_HUMAN Glycine dehydrogenase (decarboxylating), mitochondrial OS=Homo sapiens OX=9606 GN=GLDC PE=1 SV=2;tr|A0A1W2PP74|A0A1W2PP74_HUMAN Glycine dehydrogenase (aminomethyl-transferring) OS=Homo sapiens OX=9606 GN=GLDC PE=1 SV=1;tr|A0A1W2PPB1|A0	7	9	9	9	9.5	9.5	9.5	112.73	1020	1020;420;254;388;103;106;164	0	21.358	150220	186280	166170	174350	546550	175190	152370	173530	191010	170070	509430000	17				3545	17775;25773;26246;44915;45325;45326;50628;60686;66263	True;True;True;True;True;True;True;True;True	19050;27600;28109;48692;48693;49145;49146;54781;65561;71588	34885;34886;50943;52267;91751;91752;92745;92746;92747;103346;123310;123311;134594	46805;46806;68534;70218;123082;123083;123084;124613;124614;124615;124616;138259;138260;165219;165220;165221;180304	46806;68534;70218;123083;124613;124616;138260;165220;180304	3011	840	-1;-1;-1;-1;-1;-1;-1				GLDC
REV__F8VYV2;REV__A0A075B7A0;REV__G3V203;REV__H0YHA7;REV__Q07020;REV__J3QQ67	REV__F8VYV2;REV__A0A075B7A0;REV__G3V203;REV__H0YHA7;REV__Q07020;REV__J3QQ67	1;1;1;1;1;1	1;1;1;1;1;1	1;1;1;1;1;1			tr|F8VYV2|F8VYV2_HUMAN 60S ribosomal protein L18 OS=Homo sapiens OX=9606 GN=RPL18 PE=1 SV=1;tr|A0A075B7A0|A0A075B7A0_HUMAN 60S ribosomal protein L18 OS=Homo sapiens OX=9606 GN=RPL18 PE=1 SV=1;tr|G3V203|G3V203_HUMAN 60S ribosomal protein L18 OS=Homo sapiens	6	1	1	1	0	0	0	15.639	133	133;138;164;167;188;190	0.0014795	2.2663	499660	582680	735260	533880	1044700	901420	718310	577800	527220	507400	11637000000	34		+		7441	36462	TRUE	39003	73558;73559;73560;73561;73562;73563;73564;73565;73566;73567;73568;73569;73570;73571;73572;73573;73574;73575;73576;73577;73578	98868;98869;98870;98871;98872;98873;98874;98875;98876;98877;98878;98879;98880;98881;98882;98883;98884;98885;98886;98887;98888;98889;98890;98891;98892;98893;98894;98895;98896;98897;98898;98899;98900;98901	98869			-1;-1;-1;-1;-1;-1
P12814;G3V2N5;Q08043;A0A087WSZ2;G3V5M4;A0A494C033;A0A494C166;A0A494C0Q3;G3V380	P12814	43;13;8;7;5;5;5;3;2	29;8;1;1;3;2;2;2;2	2;1;0;0;1;0;0;0;1	Alpha-actinin-1	ACTN1	sp|P12814|ACTN1_HUMAN Alpha-actinin-1 OS=Homo sapiens OX=9606 GN=ACTN1 PE=1 SV=2	9	43	29	2	53	37.9	3.3	103.06	892	892;260;901;944;126;182;263;131;72	0	323.31	2555500	4103500	2573300	1867700	2545600	2051200	2191500	2517800	3721900	2888900	18542000000	108				3327	1840;2554;2555;3272;5263;5734;7342;8207;8910;9192;10567;11909;14176;15641;17391;18619;22987;25532;26726;26867;27384;27577;29223;30622;32870;33422;33744;33745;38243;39330;40488;41190;44132;44133;45609;48693;52514;56670;57207;57226;57227;62171;63152	False;True;True;False;False;True;False;True;True;True;True;True;False;False;True;False;True;False;True;False;True;True;True;True;True;False;False;False;True;True;True;True;True;True;True;True;True;False;False;True;True;True;True	1974;2729;2730;3497;5669;6178;7878;8789;9539;9840;11356;12777;15175;16734;18646;18647;19942;24617;24618;27340;28643;28791;28792;29340;29541;31301;31302;32819;32820;35218;35805;36151;36152;40916;40917;42075;43589;43590;44672;47874;47875;47876;49444;52732;56778;61212;61799;61818;61819;61820;67165;67166;68267	3965;3966;5426;5427;6911;6912;6913;10921;10922;11865;14716;14717;16246;17598;17599;18122;20951;23516;23517;23518;23519;23520;27861;30802;30803;30804;30805;30806;30807;30808;30809;30810;34123;34124;34125;34126;34127;36624;36625;36626;45262;45263;45264;50419;53770;53771;53772;53773;54094;54095;54096;54097;54098;54099;54100;54101;55154;55479;59135;59136;61876;61877;61878;61879;66601;66602;66603;6767…	5569;5570;7496;7497;9477;9478;9479;9480;9481;9482;9483;9484;14773;14774;16013;19721;19722;21726;23525;23526;23527;24197;27986;31417;31418;31419;31420;31421;37319;37320;37321;41251;41252;41253;41254;41255;41256;41257;41258;41259;41260;41261;41262;41263;41264;41265;41266;41267;41268;41269;45802;45803;45804;45805;45806;45807;49269;49270;49271;49272;60920;60921;60922;67887;72299;72300;72301;72302;723…	5570;7496;7497;9478;14773;16013;19721;21726;23526;24197;27986;31421;37320;41264;45805;49270;60922;67887;72301;72725;74073;74509;79724;83367;89350;90724;91714;91717;103910;106589;110567;113822;121266;121267;125228;133020;142982;153739;155165;155224;155229;169593;172342	664;1508;1509;1510;1511;1512;1513;1514;1515;1516;1517	221;276;306;309;354;586;710;748;796;830;845	-1;-1;-1;-1;-1;-1;-1;-1;-1				ACTN1
REV__Q9Y6R9	REV__Q9Y6R9	2	2	2			sp|Q9Y6R9|CCD61_HUMAN Coiled-coil domain-containing protein 61 OS=Homo sapiens OX=9606 GN=CCDC61 PE=1 SV=3	1	2	2	2	0	0	0	57.368	512	512	0.0020284	1.9092	31855	71960	59734	55158	84765	48660	36210	33051	63865	55702	1342400000	3		+		7562	2178;25589	True;True	2329;27405	4655;4656;50547	6483;6484;68047	6484;68047			-1
A0A0B4J1R4;P32754	A0A0B4J1R4;P32754	3;3	3;3	3;3	4-hydroxyphenylpyruvate dioxygenase	HPD	tr|A0A0B4J1R4|A0A0B4J1R4_HUMAN 4-hydroxyphenylpyruvate dioxygenase OS=Homo sapiens OX=9606 GN=HPD PE=1 SV=1;sp|P32754|HPPD_HUMAN 4-hydroxyphenylpyruvate dioxygenase OS=Homo sapiens OX=9606 GN=HPD PE=1 SV=2	2	3	3	3	12.2	12.2	12.2	44.964	393	393;393	0	18.186	26354	31523	42956	27027	75374	27454	24807	30758	31635	26216	41847000	3				358	18716;40770;53922	True;True;True	20047;44010;58291	36876;83045;109404	49655;111638;146261	49655;111638;146261			-1;-1				HPD
Q8NI22	Q8NI22	1	1	1	Multiple coagulation factor deficiency protein 2	MCFD2	sp|Q8NI22|MCFD2_HUMAN Multiple coagulation factor deficiency protein 2 OS=Homo sapiens OX=9606 GN=MCFD2 PE=1 SV=1	1	1	1	1	11.6	11.6	11.6	16.39	146	146	0	4.9367	19000	24480	18842	18417	19908	16691	22929	13588	22088	28084	61410000	1				5772	8096	TRUE	8673	16031	21443	21443			-1				MCFD2
H0YGT0;P12318;P31995;V9GY83;A0A087WXE5;P31994	H0YGT0;P12318;P31995;V9GY83;A0A087WXE5;P31994	2;2;2;1;1;1	2;2;2;1;1;1	2;2;2;1;1;1	Low affinity immunoglobulin gamma Fc region receptor II-a;Low affinity immunoglobulin gamma Fc region receptor II-c;Low affinity immunoglobulin gamma Fc region receptor II-b	FCGR2C;FCGR2A;FCGR2B	tr|H0YGT0|H0YGT0_HUMAN Low affinity immunoglobulin gamma Fc region receptor II-c OS=Homo sapiens OX=9606 GN=FCGR2C PE=4 SV=1;sp|P12318|FCG2A_HUMAN Low affinity immunoglobulin gamma Fc region receptor II-a OS=Homo sapiens OX=9606 GN=FCGR2A PE=1 SV=4;sp|P319	6	2	2	2	5.6	5.6	5.6	35.419	322	322;317;323;190;266;310	0	4.7227	76465	98569	96920	48949	79981	69646	86773	89997	116330	82073	372630000	3				2014	29893;64131	True;True	32028;69305	60436;130329;130330	81471;174600;174601	81471;174601			-1;-1;-1;-1;-1;-1				FCGR2C;FCGR2A;FCGR2B
REV__Q96DT5;REV__A0A0C4DFR0;REV__A0A087WYC6	REV__Q96DT5;REV__A0A0C4DFR0;REV__A0A087WYC6	2;2;2	2;2;2	2;2;2			sp|Q96DT5|DYH11_HUMAN Dynein heavy chain 11, axonemal OS=Homo sapiens OX=9606 GN=DNAH11 PE=1 SV=4;tr|A0A0C4DFR0|A0A0C4DFR0_HUMAN Dynein heavy chain 11, axonemal OS=Homo sapiens OX=9606 GN=DNAH11 PE=1 SV=1;tr|A0A087WYC6|A0A087WYC6_HUMAN Dynein heavy chain 1	3	2	2	2	0	0	0	520.36	4516	4516;4523;4523	0.00061013	2.6689	51423	100880	64002	39848	51663	51531	32389	62634	108780	70788	848340000	5		+		7445	34053;60876	True;True	36476;65766	69034;123705;123706;123707;123708	92763;165751;165752;165753;165754	92763;165752			-1;-1;-1
REV__Q8TEM1	REV__Q8TEM1	1	1	1			sp|Q8TEM1|PO210_HUMAN Nuclear pore membrane glycoprotein 210 OS=Homo sapiens OX=9606 GN=NUP210 PE=1 SV=3	1	1	1	1	0	0	0	205.11	1887	1887	0.0063942	1.3791	36905	79676	37335	24965	33160	31771	13328	48311	97191	28899	134170000	1		+		7542	50985	TRUE	55156	104111	139382	139382			-1
P02763	P02763	7	7	5	Alpha-1-acid glycoprotein 1	ORM1	sp|P02763|A1AG1_HUMAN Alpha-1-acid glycoprotein 1 OS=Homo sapiens OX=9606 GN=ORM1 PE=1 SV=1	1	7	7	5	35.8	35.8	25.9	23.511	201	201	0	69.726	598330	1666500	1640400	453140	1726500	1444000	928730	1475500	660040	1204400	11330000000	37				3051	6907;44051;51177;51178;56197;59706;67509	True;True;True;True;True;True;True	7427;47787;55360;55361;60709;64499;64500;72907	14058;90224;90225;90226;90227;104456;104457;104458;113970;121264;121265;121266;121267;121268;121269;121270;121271;137036;137037;137038;137039;137040;137041	18904;121116;121117;121118;121119;121120;121121;121122;121123;121124;121125;121126;139840;139841;139842;139843;139844;152528;152529;162408;162409;162410;162411;162412;162413;162414;162415;162416;162417;183558;183559;183560;183561;183562;183563;183564;183565	18904;121124;139842;139843;152529;162417;183565	2209	129	-1				ORM1
P02751;H0Y7Z1;H0Y4K8	P02751	47;23;3	47;23;3	47;23;3	Fibronectin;Anastellin;Ugl-Y1;Ugl-Y2;Ugl-Y3	FN1	sp|P02751|FINC_HUMAN Fibronectin OS=Homo sapiens OX=9606 GN=FN1 PE=1 SV=5	3	47	47	47	22.4	22.4	22.4	272.32	2477	2477;1103;241	0	323.31	1046700	1954200	2579500	1308500	1461400	1317100	1059700	1155200	1647700	1435500	8711400000	85				3048	4764;7235;7865;11351;11352;13609;17173;18267;18433;20545;21608;22236;23356;23810;27074;27364;30442;30806;35027;38875;40958;42758;44246;44247;44321;44388;44451;45062;48373;51500;54513;54699;54940;55464;56312;56480;56705;59679;59692;60614;61089;61320;63182;64074;65345;66053;67225	True;True;True;True;True;True;True;True;True;True;True;True;True;True;True;True;True;True;True;True;True;True;True;True;True;True;True;True;True;True;True;True;True;True;True;True;True;True;True;True;True;True;True;True;True;True;True	5142;7769;8434;12187;12188;14580;18405;19577;19748;22003;22004;23146;23823;25003;25520;29013;29319;32627;33017;37501;41591;44297;46379;47992;47993;48070;48138;48202;48851;52396;55703;58916;59110;59368;59920;60829;60830;61008;61251;64470;64484;65482;65997;66244;68300;69245;70606;71366;72605	9868;14542;14543;15645;22515;22516;26772;33706;33707;33708;33709;35925;36199;36200;40490;40491;42571;42572;43860;45991;45992;47023;54589;54590;55128;61540;61541;62229;70904;70905;78353;83759;83760;87723;90562;90563;90564;90687;90803;90894;92092;98534;105048;110416;110719;111158;112229;114170;114171;114172;114173;114472;114473;114474;114975;121222;121247;123187;123188;123189;123190;124140;124141;1…	13380;19500;19501;20916;30096;30097;30098;30099;35825;35826;45212;45213;45214;45215;45216;48297;48639;48640;54567;54568;57360;57361;59109;61867;61868;63286;73347;73348;74046;82915;82916;83818;83819;95362;95363;105408;112626;112627;117779;121538;121539;121540;121698;121845;121962;123604;123605;132204;132205;140630;147559;147560;147954;148541;149978;149979;149980;152780;152781;152782;152783;152784;…	13380;19501;20916;30097;30098;35826;45213;48297;48640;54568;57360;59109;61867;63286;73347;74046;82915;83819;95363;105408;112627;117779;121538;121539;121698;121845;121962;123605;132205;140630;147559;147954;148541;149979;152784;153167;153871;162358;162388;165055;166341;166998;172415;174494;178046;179812;182929	2207;2208	1374;1639	-1;-1;-1				FN1
REV__P20702;REV__H3BN02	REV__P20702;REV__H3BN02	1;1	1;1	1;1			sp|P20702|ITAX_HUMAN Integrin alpha-X OS=Homo sapiens OX=9606 GN=ITGAX PE=1 SV=3;tr|H3BN02|H3BN02_HUMAN Integrin alpha-X OS=Homo sapiens OX=9606 GN=ITGAX PE=1 SV=1	2	1	1	1	0	0	0	127.83	1163	1163;1169	0.0065305	1.3735	39568	51995	47256	36555	70411	59769	48946	47569	59845	32536	1310700000	4		+		7496	61163	TRUE	66073	124300;124301;124302;124303	166553;166554;166555;166556	166554			-1;-1
P13747	P13747	7	6	6	HLA class I histocompatibility antigen, alpha chain E	HLA-E	sp|P13747|HLAE_HUMAN HLA class I histocompatibility antigen, alpha chain E OS=Homo sapiens OX=9606 GN=HLA-E PE=1 SV=4	1	7	6	6	21.8	18.2	18.2	40.057	358	358	0	12.459	125740	140140	113880	78854	98402	98888	67062	94090	132380	124070	267140000	7				3350	11965;17586;18858;25539;53313;55328;65058	True;True;True;True;True;True;False	12836;18852;20198;27348;57656;59777;70300	23623;34483;37151;50430;108342;108343;111946;132385;132386;132387	31551;46264;50024;67900;144917;144918;149585;177382;177383;177384;177385;177386;177387	31551;46264;50024;67900;144917;149585;177382			-1				HLA-E
P30273;A6NCQ8	P30273	3;1	3;1	3;1	High affinity immunoglobulin epsilon receptor subunit gamma	FCER1G	sp|P30273|FCERG_HUMAN High affinity immunoglobulin epsilon receptor subunit gamma OS=Homo sapiens OX=9606 GN=FCER1G PE=1 SV=1	2	3	3	3	32.6	32.6	32.6	9.6674	86	86;112	0	8.4212	210280	245070	248970	101520	171970	172670	178380	257230	379960	220740	2114300000	9				3675	378;43273;50986	True;True;True	388;46945;55157	666;667;668;88670;88671;88672;104112	883;884;885;886;887;119033;119034;119035;139383	883;119034;139383			-1;-1				FCER1G
F8WCP2;F8WCP3;A4D161	F8WCP2;F8WCP3;A4D161	1;1;1	1;1;1	1;1;1	Protein FAM221A	FAM221A	tr|F8WCP2|F8WCP2_HUMAN Protein FAM221A OS=Homo sapiens OX=9606 GN=FAM221A PE=1 SV=1;tr|F8WCP3|F8WCP3_HUMAN Protein FAM221A OS=Homo sapiens OX=9606 GN=FAM221A PE=1 SV=1;sp|A4D161|F221A_HUMAN Protein FAM221A OS=Homo sapiens OX=9606 GN=FAM221A PE=1 SV=1	3	1	1	1	9.2	9.2	9.2	11.178	98	98;114;298	0.004784	1.5083	15342	20335	13186	14248	16929	15345	16840	12287	20802	18995	25363000	1				961	30535	TRUE	32725	61709	83148	83148			-1;-1;-1				FAM221A
O75531	O75531	5	5	5	Barrier-to-autointegration factor;Barrier-to-autointegration factor, N-terminally processed	BANF1	sp|O75531|BAF_HUMAN Barrier-to-autointegration factor OS=Homo sapiens OX=9606 GN=BANF1 PE=1 SV=1	1	5	5	5	58.4	58.4	58.4	10.058	89	89	0	14.22	154070	177760	164170	152000	162010	177270	250760	123380	146280	263450	958710000	10				2769	8014;11248;26699;30981;30982	True;True;True;True;True	8586;12078;28615;33198;33199	15881;22245;53561;53562;62548;62549;62550;62551	21229;29696;71974;71975;84225;84226;84227;84228;84229;84230	21229;29696;71974;84226;84228	1916	15	-1				BANF1
P21810	P21810	13	12	6	Biglycan	BGN	sp|P21810|PGS1_HUMAN Biglycan OS=Homo sapiens OX=9606 GN=BGN PE=1 SV=2	1	13	12	6	38.3	36.1	19	41.654	368	368	0	323.31	2417400	4385900	2861500	1439600	2731700	2330900	2447300	2938500	2412400	2839600	43095000000	75				3510	10011;14843;14844;15424;23487;25208;28338;32876;34832;42172;61572;63258;64709	True;True;True;False;True;True;True;True;True;True;True;True;True	10719;15892;15893;16502;25141;26986;30343;35224;37296;45752;66512;66513;68381;69934	19700;19701;19702;19703;19704;19705;19706;19707;19708;29245;29246;29247;30421;30422;30423;30424;30425;30426;30427;46212;46213;46214;46215;49734;49735;49736;49737;49738;56921;56922;66611;66612;70534;70535;70536;70537;70538;86548;86549;86550;86551;86552;86553;125106;125107;125108;125109;125110;125111;128829;128830;128831;131729;131730;131731;131732;131733;131734	26248;26249;26250;26251;26252;26253;26254;26255;26256;26257;26258;26259;26260;26261;26262;26263;39108;39109;39110;40747;40748;40749;40750;40751;40752;40753;40754;40755;40756;40757;40758;40759;40760;40761;40762;62131;62132;62133;62134;66967;66968;66969;66970;66971;66972;66973;66974;66975;66976;66977;66978;76491;76492;89365;89366;89367;89368;94848;94849;94850;94851;94852;94853;94854;116256;116257;1…	26254;39108;39109;40748;62134;66970;76491;89368;94848;116258;167635;172663;176534	2965	323	-1				BGN
Q5T9L3;E9PKJ0;E9PJW4;H0YCG9;E9PM62;E9PM23;Q7Z430	Q5T9L3;E9PKJ0;E9PJW4;H0YCG9;E9PM62	4;2;2;2;2;1;1	4;2;2;2;2;1;1	4;2;2;2;2;1;1	Protein wntless homolog	WLS	sp|Q5T9L3|WLS_HUMAN Protein wntless homolog OS=Homo sapiens OX=9606 GN=WLS PE=1 SV=2;tr|E9PKJ0|E9PKJ0_HUMAN Protein wntless homolog (Fragment) OS=Homo sapiens OX=9606 GN=WLS PE=1 SV=1;tr|E9PJW4|E9PJW4_HUMAN Protein wntless homolog (Fragment) OS=Homo sapien	7	4	4	4	5.9	5.9	5.9	62.253	541	541;122;134;200;222;38;127	0	8.0852	51033	87882	74226	48937	67889	64343	71537	58384	62688	65721	119200000	5				5073	2174;29376;29377;47744	True;True;True;True	2325;31478;31479;51734	4647;59426;59427;97324;97325	6474;80077;80078;130602;130603	6474;80077;80078;130602			-1;-1;-1;-1;-1;-1;-1				WLS
A0A0S2Z4L7;A0A2R8Y4N9;O60603	A0A0S2Z4L7;A0A2R8Y4N9;O60603	1;1;1	1;1;1	1;1;1	Toll-like receptor 2	TLR2	tr|A0A0S2Z4L7|A0A0S2Z4L7_HUMAN Toll-like receptor 2 (Fragment) OS=Homo sapiens OX=9606 GN=TLR2 PE=1 SV=1;tr|A0A2R8Y4N9|A0A2R8Y4N9_HUMAN Toll-like receptor 2 (Fragment) OS=Homo sapiens OX=9606 GN=TLR2 PE=1 SV=1;sp|O60603|TLR2_HUMAN Toll-like receptor 2 OS=H	3	1	1	1	8.6	8.6	8.6	24.292	210	210;246;784	0	12.024	7235.3	10368	9714.9	5489.6	10663	9043.4	15400	11553	13621	6792.5	20700000	1				510	24754	TRUE	26510	48715	65506	65506			-1;-1;-1				TLR2
A0A087WSY5;Q96IY4	A0A087WSY5;Q96IY4	2;2	2;2	2;2	Carboxypeptidase B2	CPB2	tr|A0A087WSY5|A0A087WSY5_HUMAN Carboxypeptidase B2 OS=Homo sapiens OX=9606 GN=CPB2 PE=1 SV=1;sp|Q96IY4|CBPB2_HUMAN Carboxypeptidase B2 OS=Homo sapiens OX=9606 GN=CPB2 PE=1 SV=2	2	2	2	2	4.9	4.9	4.9	44.022	386	386;423	0.0001665	4.0771	35136	56936	67499	29747	51831	45147	29510	44142	43487	41944	96002000	3				28	5946;11313	True;True	6403;12148	12218;12219;22440	16468;16469;29992	16469;29992			-1;-1				CPB2
A0A096LP69;A8MQT7	A0A096LP69	4;1	2;0	2;0		CD99	tr|A0A096LP69|A0A096LP69_HUMAN CD99 antigen OS=Homo sapiens OX=9606 GN=CD99 PE=1 SV=1	2	4	2	2	30.4	9.2	9.2	18.777	184	184;177	0	13.224	72782	104840	65255	43547	51535	86650	75550	70353	51312	104480	820090000	12				236	16122;32212;33209;41396	True;False;True;False	17303;17304;34519;35582;44936	31856;31857;31858;31859;31860;31861;31862;65254;65255;67325;85208;85209;85210;85211	42703;42704;42705;42706;42707;42708;42709;42710;42711;42712;42713;87605;87606;87607;90297;114527;114528;114529;114530	42711;87607;90297;114528	189	165	-1;-1				CD99
P82987	P82987	2	2	2	ADAMTS-like protein 3	ADAMTSL3	sp|P82987|ATL3_HUMAN ADAMTS-like protein 3 OS=Homo sapiens OX=9606 GN=ADAMTSL3 PE=1 SV=4	1	2	2	2	1.5	1.5	1.5	188.69	1691	1691	0	7.0603	32787	83954	58895	25764	35684	32014	28451	42362	32004	39521	70642000	2				4342	28366;34712	True;True	30375;37173	57284;70281	77243;94513	77243;94513			-1				ADAMTSL3
E9PGN7;P05155;H9KV48;H0YCA1;C9JZJ9;A0A087WUD9;B5MCB9;CON__P50448	E9PGN7;P05155;H9KV48	13;13;12;3;1;1;1;1	13;13;12;3;1;1;1;1	13;13;12;3;1;1;1;1	Plasma protease C1 inhibitor	SERPING1	tr|E9PGN7|E9PGN7_HUMAN Plasma protease C1 inhibitor OS=Homo sapiens OX=9606 GN=SERPING1 PE=1 SV=1;sp|P05155|IC1_HUMAN Plasma protease C1 inhibitor OS=Homo sapiens OX=9606 GN=SERPING1 PE=1 SV=2;tr|H9KV48|H9KV48_HUMAN Plasma protease C1 inhibitor OS=Homo sap	8	13	13	13	22.8	22.8	22.8	59.491	543	543;500;463;86;122;133;160;468	0	47.677	448700	879280	857470	378400	663200	490520	511080	633120	660070	600520	2126900000	25				1610	8704;20041;20152;26716;32559;35843;39572;40140;57872;58004;58611;60170;64340	True;True;True;True;True;True;True;True;True;True;True;True;True	9320;21475;21593;28632;28633;34888;38369;42327;43094;43095;62510;62677;63319;65014;69534;69535	17141;39480;39711;53752;53753;53754;65949;65950;72488;79710;81233;81234;117221;117519;118981;122288;130759;130760;130761;130762	22876;22877;53162;53477;72276;72277;72278;72279;88464;88465;88466;88467;97429;97430;107283;109318;109319;156808;157182;159347;163809;175156;175157;175158;175159	22876;53162;53477;72277;88467;97430;107283;109318;156808;157182;159347;163809;175159	1187;1188;1189;1190	353;413;452;456	-1;-1;-1;-1;-1;-1;-1;-1				SERPING1
Q6PCB0;J3QLP3	Q6PCB0	9;3	9;3	9;3	von Willebrand factor A domain-containing protein 1	VWA1	sp|Q6PCB0|VWA1_HUMAN von Willebrand factor A domain-containing protein 1 OS=Homo sapiens OX=9606 GN=VWA1 PE=1 SV=1	2	9	9	9	20	20	20	46.804	445	445;167	0	43.675	246180	584930	495540	297190	403030	304310	317600	299770	307100	318210	2166400000	22				5240	903;4539;4540;16667;17024;23746;24031;30560;40256	True;True;True;True;True;True;True;True;True	962;4908;4909;17879;18251;25451;25753;32754;43259	1790;9466;9467;32805;32806;32807;32808;33471;46889;46890;46891;46892;46893;47440;61767;61768;81569;81570	2444;12851;12852;44014;44015;44016;44017;44909;63093;63094;63095;63096;63097;63098;63099;63100;63101;63814;83225;83226;109779;109780	2444;12851;12852;44014;44909;63097;63814;83225;109780			-1;-1				VWA1
P14209	P14209	4	4	2	CD99 antigen	CD99	sp|P14209|CD99_HUMAN CD99 antigen OS=Homo sapiens OX=9606 GN=CD99 PE=1 SV=1	1	4	4	2	30.8	30.8	9.7	18.848	185	185	0	113.26	596240	953190	537030	357730	449370	786190	619490	635790	482210	786570	12868000000	94				3360	16081;32212;33208;41396	True;True;True;True	17259;17260;34519;35580;35581;44936	31770;31771;31772;31773;31774;31775;31776;31777;31778;31779;31780;31781;31782;31783;31784;31785;31786;31787;31788;31789;31790;31791;31792;31793;31794;65254;65255;67316;67317;67318;67319;67320;67321;67322;67323;67324;85208;85209;85210;85211	42549;42550;42551;42552;42553;42554;42555;42556;42557;42558;42559;42560;42561;42562;42563;42564;42565;42566;42567;42568;42569;42570;42571;42572;42573;42574;42575;42576;42577;42578;42579;42580;42581;42582;42583;42584;42585;42586;42587;42588;42589;42590;42591;42592;42593;42594;42595;42596;42597;42598;42599;42600;42601;42602;42603;42604;42605;42606;42607;42608;42609;42610;42611;42612;42613;42614;426…	42593;87607;90294;114528	2722	166	-1				CD99
A0A140T9X6;A0A140T9W7;A0A140T9W3;A0A140T9D9;A0A140T9C2;A0A140T939;A0A140T9V0;A0A140T8X0;D0EV57;A0A0G2JPA3;A0A140T9B7;A0A0G2JH66;P30511;A0A0D9SFW8;A0A140T9J8;A0A0G2JNV5	A0A140T9X6;A0A140T9W7;A0A140T9W3;A0A140T9D9;A0A140T9C2;A0A140T939;A0A140T9V0;A0A140T8X0;D0EV57;A0A0G2JPA3;A0A140T9B7;A0A0G2JH66;P30511	3;3;3;3;3;3;3;3;3;3;3;3;2;1;1;1	2;2;2;2;2;2;2;2;2;2;2;2;2;1;1;1	2;2;2;2;2;2;2;2;2;2;2;2;2;1;1;1	HLA class I histocompatibility antigen, alpha chain F	HLA-F	tr|A0A140T9X6|A0A140T9X6_HUMAN HLA class I histocompatibility antigen, alpha chain F (Fragment) OS=Homo sapiens OX=9606 GN=HLA-F PE=1 SV=1;tr|A0A140T9W7|A0A140T9W7_HUMAN HLA class I histocompatibility antigen, alpha chain F (Fragment) OS=Homo sapiens OX=96	16	3	2	2	23.9	17.8	17.8	23.777	213	213;225;225;225;225;225;334;334;346;346;442;442;346;143;242;254	0	20.117	7080.4	11824	6717.3	6288.1	7361.6	6245.1	11410	7364.1	10127	8228	21627000	2				458	8801;55327;65058	True;True;False	9423;59776;70300	17358;111945;132385;132386;132387	23208;149584;177382;177383;177384;177385;177386;177387	23208;149584;177382			-1;-1;-1;-1;-1;-1;-1;-1;-1;-1;-1;-1;-1;-1;-1;-1				HLA-F
P31431	P31431	5	5	5	Syndecan-4	SDC4	sp|P31431|SDC4_HUMAN Syndecan-4 OS=Homo sapiens OX=9606 GN=SDC4 PE=1 SV=2	1	5	5	5	18.2	18.2	18.2	21.641	198	198	0	14.027	129410	186300	145890	110060	157590	167320	127100	129920	154150	170220	257730000	7				3694	2516;30084;31876;33853;49307	True;True;True;True;True	2686;32252;34160;36268;53383	5337;60867;64633;68691;100545	7391;7392;82027;82028;86849;92307;134697	7392;82027;86849;92307;134697			-1				SDC4
A0A286YFJ8;P01861	A0A286YFJ8;P01861	10;10	4;4	4;4	Ig gamma-4 chain C region	IGHG4	tr|A0A286YFJ8|A0A286YFJ8_HUMAN Immunoglobulin heavy constant gamma 4 (Fragment) OS=Homo sapiens OX=9606 GN=IGHG4 PE=1 SV=1;sp|P01861|IGHG4_HUMAN Immunoglobulin heavy constant gamma 4 OS=Homo sapiens OX=9606 GN=IGHG4 PE=1 SV=1	2	10	4	4	29.5	13.9	13.9	43.831	396	396;327	0	119.51	250730	324770	709320	343150	543110	507100	319540	341990	393720	188080	1207700000	14				648	11345;16433;23454;24120;43383;54912;59106;59735;64758;64759	False;True;True;False;False;False;True;True;False;False	12180;12181;17634;17635;25107;25842;47068;59339;63848;64531;69985;69986	22498;22499;22500;22501;22502;22503;22504;22505;22506;22507;32361;32362;32363;32364;32365;32366;32367;32368;46166;47558;47559;47560;88900;88901;88902;88903;88904;88905;111104;111105;111106;111107;111108;111109;111110;111111;111112;111113;119916;121311;131829;131830;131831	30066;30067;30068;30069;30070;30071;30072;30073;30074;30075;30076;30077;30078;30079;30080;30081;30082;30083;30084;43382;43383;43384;43385;43386;43387;43388;43389;43390;62080;62081;63975;63976;63977;63978;63979;63980;63981;63982;119346;119347;119348;119349;119350;119351;119352;119353;119354;148468;148469;148470;148471;148472;148473;148474;148475;148476;148477;148478;148479;148480;148481;148482;148…	30068;43385;62080;63977;119349;148471;160558;162463;176663;176664	537	238	-1;-1				IGHG4
A0A075B7B1;H0YL34;C9JIE4	A0A075B7B1;H0YL34	54;33;23	1;0;1	1;0;1		SYNM	tr|A0A075B7B1|A0A075B7B1_HUMAN Desmuslin, isoform CRA_a OS=Homo sapiens OX=9606 GN=SYNM PE=1 SV=1;tr|H0YL34|H0YL34_HUMAN Synemin OS=Homo sapiens OX=9606 GN=SYNM PE=1 SV=1	3	54	1	1	38.8	0.7	0.7	140.16	1253	1253;967;339	0.00015449	2.9104	155090	151420	108600	81119	207570	127670	119350	122440	35615	172540	435400000	3				23	403;1657;5031;5667;6056;6373;7692;8299;8766;11989;12432;14254;14255;15681;16198;16499;16914;16915;17749;18113;18114;18127;22225;23166;24434;24444;24735;33275;33731;37187;37722;39527;40915;40919;41638;43432;45693;47280;47281;49135;51892;53478;55107;56330;56636;56661;56814;58372;59773;60755;61758;64405;67329;67330	False;False;False;False;False;False;False;False;False;False;False;False;False;False;False;False;False;False;False;False;False;False;False;False;False;False;False;False;False;False;False;False;False;False;False;False;False;False;False;False;False;False;False;False;False;False;False;False;False;False;True;False;False;False	417;1762;5420;6109;6520;6855;8246;8881;8882;9384;12863;13335;15263;15264;16776;17387;17705;18138;18139;19023;19415;19416;19429;23809;24806;26173;26183;26490;35653;36137;39807;40373;42282;44234;44235;44240;44241;45196;47122;49531;51240;51241;53201;56113;57826;59539;60848;61177;61202;61362;63064;64574;65632;66716;69603;72716;72717	748;3362;3363;10404;11718;11719;12428;13068;13069;15266;16409;16410;16411;17253;23677;23678;24572;28033;28034;28035;30887;31994;32521;33265;33266;33267;34807;35640;35641;35642;35664;43835;45636;45637;48139;48153;48154;48688;48689;67433;68329;74984;74985;76126;79639;83645;83646;83651;83652;83653;83654;85635;85636;89021;89022;89023;93375;93376;96472;96473;100146;100147;105699;108647;108648;111444;1…	1010;1011;4625;4626;4627;14083;14084;14085;15798;15799;15800;16756;17625;17626;20396;21933;21934;21935;23045;23046;31632;31633;31634;32884;32885;37557;37558;37559;37560;37561;41385;41386;41387;42899;42900;43657;44589;44590;44591;46693;47919;47920;47921;47922;47955;47956;59078;61412;61413;64754;64770;64771;65468;65469;90425;91689;91690;100763;100764;100765;100766;100767;100768;102395;107186;112486…	1010;4625;14084;15798;16756;17625;20396;21935;23046;31632;32884;37557;37561;41386;42899;43657;44589;44591;46693;47921;47922;47956;59078;61412;64754;64770;65468;90425;91689;100766;102395;107186;112486;112494;115074;119507;125420;129475;129476;134197;141465;145307;148937;152825;153667;153712;154073;158585;162540;165412;168336;175330;183156;183157	32;33;34	258;964;1027	-1;-1;-1				SYNM
H7C2G2;Q93070	H7C2G2;Q93070	1;1	1;1	1;1	NAD(P)(+)--arginine ADP-ribosyltransferase;Ecto-ADP-ribosyltransferase 4	ART4	tr|H7C2G2|H7C2G2_HUMAN NAD(P)(+)--arginine ADP-ribosyltransferase (Fragment) OS=Homo sapiens OX=9606 GN=ART4 PE=1 SV=1;sp|Q93070|NAR4_HUMAN Ecto-ADP-ribosyltransferase 4 OS=Homo sapiens OX=9606 GN=ART4 PE=2 SV=2	2	1	1	1	2.6	2.6	2.6	31.511	273	273;314	1	-2	43394	115220	121570	58441	67203	45798	47035	56176	69237	85895	702330000	3	+			2146	4002	TRUE	4275;4276	8263;8264;8265	11252;11253;11254	11252	1501	123	-1;-1				ART4
Q8TB24;A0A087WWY9;H0YJ83	Q8TB24;A0A087WWY9;H0YJ83	4;4;3	4;4;3	4;4;3	Ras and Rab interactor 3	RIN3	sp|Q8TB24|RIN3_HUMAN Ras and Rab interactor 3 OS=Homo sapiens OX=9606 GN=RIN3 PE=1 SV=4;tr|A0A087WWY9|A0A087WWY9_HUMAN Ras and Rab interactor 3 OS=Homo sapiens OX=9606 GN=RIN3 PE=1 SV=1;tr|H0YJ83|H0YJ83_HUMAN Ras and Rab interactor 3 (Fragment) OS=Homo sap	3	4	4	4	3.9	3.9	3.9	107.85	985	985;913;420	0	22.549	99761	149940	104530	73513	113500	98531	106560	110660	145280	133410	310410000	5				116	9021;17327;55398;64519	True;True;True;True	9659;18571;59848;69730	17801;33982;33983;112099;131328	23788;45584;45585;149813;175992	23788;45585;149813;175992			-1;-1;-1				RIN3
P62805	P62805	9	9	9	Histone H4	HIST1H4A	sp|P62805|H4_HUMAN Histone H4 OS=Homo sapiens OX=9606 GN=H4C1 PE=1 SV=2	1	9	9	9	56.3	56.3	56.3	11.367	103	103	0	34.355	1803900	2606600	2504100	1547000	2621600	2902800	2132300	2099800	1627800	2263900	53176000000	76				4252	7972;10365;10366;29990;49305;49306;59524;59525;61174	True;True;True;True;True;True;True;True;True	8542;11140;11141;32137;53381;53382;64299;64300;64301;64302;66086	15806;15807;15808;15809;15810;15811;15812;15813;15814;15815;20530;20531;20532;20533;20534;20535;20536;20537;20538;20539;60657;60658;60659;100539;100540;100541;100542;100543;100544;120840;120841;120842;120843;120844;120845;120846;120847;120848;120849;120850;120851;120852;120853;124326;124327;124328;124329	21128;21129;21130;21131;21132;21133;21134;21135;21136;21137;21138;21139;21140;21141;21142;21143;21144;21145;21146;27385;27386;27387;27388;27389;27390;27391;27392;27393;27394;27395;27396;27397;27398;27399;27400;27401;27402;27403;27404;81771;81772;81773;81774;81775;81776;134690;134691;134692;134693;134694;134695;134696;161857;161858;161859;161860;161861;161862;161863;161864;161865;161866;161867;161…	21132;27386;27395;81772;134691;134696;161863;161871;166584	4034	85	-1				HIST1H4A
Q8N6Q4;K7ELG1;K7ELH8;Q6ZPD9	Q8N6Q4;K7ELG1;K7ELH8;Q6ZPD9	1;1;1;1	1;1;1;1	1;1;1;1	Probable C-mannosyltransferase DPY19L3	DPY19L3	tr|Q8N6Q4|Q8N6Q4_HUMAN Dpy-19-like 3 (C. elegans) OS=Homo sapiens OX=9606 GN=DPY19L3 PE=1 SV=1;tr|K7ELG1|K7ELG1_HUMAN Probable C-mannosyltransferase DPY19L3 (Fragment) OS=Homo sapiens OX=9606 GN=DPY19L3 PE=1 SV=1;tr|K7ELH8|K7ELH8_HUMAN Probable C-mannosylt	4	1	1	1	15.7	15.7	15.7	11.586	102	102;126;688;716	0	15.441	10454	14598	14697	9255.9	11900	12693	12894	11403	14446	15894	32986000	2				2302	5632	TRUE	6072	11656	15721;15722	15721			-1;-1;-1;-1				DPY19L3
Q9H773;H3BSA6	Q9H773	4;1	4;1	4;1	dCTP pyrophosphatase 1	DCTPP1	sp|Q9H773|DCTP1_HUMAN dCTP pyrophosphatase 1 OS=Homo sapiens OX=9606 GN=DCTPP1 PE=1 SV=1	2	4	4	4	27.1	27.1	27.1	18.681	170	170;71	0	18.825	30188	30841	35943	23408	25911	21855	24977	23842	39794	64706	92369000	4				6642	7390;21623;54988;55977	True;True;True;True	7928;23162;59417;60471	14787;42591;111239;113550	19806;57385;148666;151969	19806;57385;148666;151969			-1;-1				DCTPP1
J3QLL0;J3KS65;P52292	J3QLL0;J3KS65;P52292	2;2;2	2;2;2	2;2;2	Importin subunit alpha-1	KPNA2	tr|J3QLL0|J3QLL0_HUMAN Importin subunit alpha-1 (Fragment) OS=Homo sapiens OX=9606 GN=KPNA2 PE=1 SV=1;tr|J3KS65|J3KS65_HUMAN Importin subunit alpha-1 (Fragment) OS=Homo sapiens OX=9606 GN=KPNA2 PE=1 SV=1;sp|P52292|IMA1_HUMAN Importin subunit alpha-1 OS=Hom	3	2	2	2	26.1	26.1	26.1	15.234	134	134;143;529	0	32.254	12009	13603	10676	11459	12807	14020	15058	9770.7	15927	81793	100860000	3				2239	22941;43997	True;True	24566;47731	45164;45165;90128	60796;60797;120986	60796;120986			-1;-1;-1				KPNA2
B7ZL25;A0A140TA40;A0A0A0MTG1;B4E0K6;A0A140T8Y0;A0A140TA35;A0A0G2JL52;Q5ST30;A0A140TA45;A0A0G2JIA5;A0A140TA36;A2ABL6;B7ZCJ6	B7ZL25;A0A140TA40;A0A0A0MTG1;B4E0K6;A0A140T8Y0;A0A140TA35;A0A0G2JL52;Q5ST30;A0A140TA45;A0A0G2JIA5;A0A140TA36	4;4;4;4;4;4;4;4;3;3;3;1;1	4;4;4;4;4;4;4;4;3;3;3;1;1	4;4;4;4;4;4;4;4;3;3;3;1;1	Valine--tRNA ligase, mitochondrial	VARS2	tr|B7ZL25|B7ZL25_HUMAN Valyl-tRNA synthetase OS=Homo sapiens OX=9606 GN=VARS2 PE=1 SV=1;tr|A0A140TA40|A0A140TA40_HUMAN Valyl-tRNA synthetase OS=Homo sapiens OX=9606 GN=VARS2 PE=1 SV=1;tr|A0A0A0MTG1|A0A0A0MTG1_HUMAN Valyl-tRNA synthetase OS=Homo sapiens OX=	13	4	4	4	3.5	3.5	3.5	118.37	1061	1061;1061;1061;1063;1063;1093;1093;1063;1061;1063;1093;115;326	0	10.062	140280	117600	88679	87674	146430	107220	100570	101090	135140	151300	138640000	5				340	5889;38355;44922;67382	True;True;True;True	6342;41037;48700;72772	12121;77416;91760;136813;136814	16338;104176;123093;183269;183270	16338;104176;123093;183269			-1;-1;-1;-1;-1;-1;-1;-1;-1;-1;-1;-1;-1				VARS2
P17931;G3V3R6	P17931;G3V3R6	11;8	11;8	11;8	Galectin-3;Galectin	LGALS3	sp|P17931|LEG3_HUMAN Galectin-3 OS=Homo sapiens OX=9606 GN=LGALS3 PE=1 SV=5;tr|G3V3R6|G3V3R6_HUMAN Galectin OS=Homo sapiens OX=9606 GN=LGALS3 PE=1 SV=1	2	11	11	11	34.8	34.8	34.8	26.152	250	250;233	0	29.381	845150	1450400	1279700	572860	904170	768470	795690	1075400	1253800	1029400	8537500000	44				3437	19900;23725;27220;29772;31919;33504;33505;47783;47784;60217;62006	True;True;True;True;True;True;True;True;True;True;True	21327;25428;29166;31894;34204;35899;35900;51774;51775;65062;66984	39182;39183;46858;46859;54867;54868;54869;60199;60200;60201;60202;60203;64705;67839;67840;67841;67842;97383;97384;97385;97386;122388;122389;122390;126196;126197;126198	52738;52739;63056;63057;63058;63059;63060;73706;73707;73708;73709;81175;81176;81177;81178;81179;81180;81181;81182;81183;86936;90945;90946;90947;90948;90949;130672;130673;130674;130675;130676;130677;163977;163978;163979;163980;163981;169145;169146;169147;169148;169149;169150;169151	52738;63059;73708;81182;86936;90945;90948;130672;130677;163981;169149			-1;-1				LGALS3
H7C4C5	H7C4C5	31	1	1	Microtubule-associated protein	MAP4	tr|H7C4C5|H7C4C5_HUMAN Microtubule-associated protein (Fragment) OS=Homo sapiens OX=9606 GN=MAP4 PE=1 SV=1	1	31	1	1	50.7	2.6	2.6	50.865	493	493	0	4.4716	167600	97955	143370	101460	118430	69739	76060	70651	87711	104280	540590000	6				2155	5360;5772;11628;12586;15643;15644;26226;26670;32171;33130;44251;44411;44422;44477;44528;44545;44547;47023;47024;53711;54903;54931;55158;56292;56293;57364;58482;59156;59164;61533;61541	False;False;False;True;False;False;False;False;False;False;False;False;False;False;False;False;False;False;False;False;False;False;False;False;False;False;False;False;False;False;False	5775;6220;6221;12476;13501;16736;16737;28086;28585;34475;34476;35498;47997;48163;48174;48232;48285;48304;48306;50969;50970;58072;59330;59358;59359;59596;60808;60809;61970;63181;63900;63909;66472;66480	11078;11079;11080;11081;11082;11928;11929;11930;11931;11932;11933;11934;22973;22974;22975;22976;22977;24870;24871;24872;24873;30812;30813;30814;30815;30816;52226;52227;53517;65180;65181;65182;65183;65184;67138;67139;67140;90569;90847;90863;90959;90960;91028;91029;91030;91051;91052;91054;96050;96051;96052;96053;96054;96055;96056;96057;109051;109052;109053;111092;111093;111146;111147;111548;111549;…	14967;14968;14969;14970;14971;16091;16092;16093;16094;16095;16096;16097;16098;16099;16100;16101;16102;30699;30700;30701;30702;30703;30704;30705;30706;33252;33253;33254;33255;33256;33257;41271;41272;41273;41274;41275;41276;41277;41278;41279;41280;41281;41282;41283;41284;41285;41286;70175;70176;71926;87520;87521;87522;87523;87524;87525;87526;87527;90038;90039;90040;90041;121545;121546;121902;121920…	14969;16100;30705;33252;41282;41286;70176;71926;87526;90039;121545;121902;121920;122060;122142;122170;122173;128929;128938;145821;148456;148527;149068;152736;152738;155575;158865;160651;160672;167532;167550	1104;1114;1115	152;280;305	-1				MAP4
Q5TCU3	Q5TCU3	32	1	1		TPM2	tr|Q5TCU3|Q5TCU3_HUMAN Tropomyosin beta chain OS=Homo sapiens OX=9606 GN=TPM2 PE=1 SV=1	1	32	1	1	60.9	4.6	4.6	32.814	284	284	0	41.469	85462	105130	59989	53945	78961	53895	62784	66852	87483	46583	1275100000	1				5080	146;147;1744;1745;5558;5559;6970;12967;24883;26129;26130;29666;29667;30939;30940;31974;31976;33111;33778;33779;34135;35590;35671;39137;39139;40116;46367;49291;49292;52696;57084;65951	False;False;False;False;False;False;False;False;False;False;False;False;False;False;False;False;False;False;False;False;False;False;False;False;False;False;False;False;False;False;True;False	149;150;1870;1871;5989;5990;7492;13900;26648;27987;27988;31781;31782;33155;33156;34262;34264;35476;36185;36186;36187;36567;38103;38187;41868;41870;43062;50241;53365;53366;56975;61661;71256	234;235;236;3786;3787;3788;3789;3790;11517;11518;11519;11520;14145;25549;25550;48963;48964;52023;52024;52025;52026;52027;52028;52029;52030;60002;60003;60004;60005;60006;60007;60008;60009;62455;62456;62457;62458;64801;64802;64803;64804;64805;64808;67086;67087;67088;67089;67090;67091;67092;67093;68400;68401;68402;68403;68404;69165;72053;72192;78822;78823;78826;78827;81165;81166;81167;81168;94738;94…	294;295;296;297;5340;5341;5342;5343;5344;5345;15545;15546;15547;15548;15549;19019;19020;34180;34181;34182;34183;65828;65829;65830;65831;69927;69928;69929;69930;69931;69932;69933;69934;80910;80911;80912;80913;80914;80915;80916;80917;80918;80919;80920;80921;80922;80923;84107;84108;84109;84110;87063;87064;87065;87066;87067;87068;87069;87070;87071;87072;87073;87077;89972;89973;89974;89975;89976;89977…	294;297;5341;5344;15546;15549;19019;34182;65831;69928;69934;80912;80918;84108;84109;87070;87077;89978;91782;91783;92927;96892;97066;106021;106025;109250;127203;134605;134612;143454;154893;179562	102	127	-1				TPM2
A0A0G2JR51;Q15080;A0A494BZS1;A0A217FLJ2;B0QY04	A0A0G2JR51;Q15080;A0A494BZS1;A0A217FLJ2	3;3;2;2;1	3;3;2;2;1	3;3;2;2;1	Neutrophil cytosol factor 4	NCF4	tr|A0A0G2JR51|A0A0G2JR51_HUMAN Neutrophil cytosol factor 4 (Fragment) OS=Homo sapiens OX=9606 GN=NCF4 PE=1 SV=1;sp|Q15080|NCF4_HUMAN Neutrophil cytosol factor 4 OS=Homo sapiens OX=9606 GN=NCF4 PE=1 SV=2;tr|A0A494BZS1|A0A494BZS1_HUMAN Neutrophil cytosol fac	5	3	3	3	10.7	10.7	10.7	34.348	300	300;339;236;348;166	0	20.12	36377	49404	41986	22218	34098	29408	21521	39096	58087	35224	42875000	3				481	9923;54219;55230	True;True;True	10618;58609;59672	19542;109936;111720	26055;146934;149296	26055;146934;149296			-1;-1;-1;-1;-1				NCF4
P00734;E9PIT3;C9JV37;CON__P00735	P00734;E9PIT3	11;10;5;2	11;10;5;2	11;10;5;2	Prothrombin;Activation peptide fragment 1;Activation peptide fragment 2;Thrombin light chain;Thrombin heavy chain	F2	sp|P00734|THRB_HUMAN Prothrombin OS=Homo sapiens OX=9606 GN=F2 PE=1 SV=2;tr|E9PIT3|E9PIT3_HUMAN Activation peptide fragment 1 OS=Homo sapiens OX=9606 GN=F2 PE=1 SV=1	4	11	11	11	24.1	24.1	24.1	70.036	622	622;583;324;625	0	42.992	215870	453680	381160	228820	276340	237840	230470	240550	277570	292140	534990000	15				2984	15510;16184;17761;30221;43095;49049;49892;51368;51369;55791;66207	True;True;True;True;True;True;True;True;True;True;True	16590;17370;19035;32396;46755;53108;54002;54003;55559;55560;60275;71527	30573;31962;34830;61109;88387;99992;101776;101777;104806;104807;113200;134484	40972;42853;46731;46732;82322;118629;134021;136221;136222;140313;140314;140315;151448;151449;180163	40972;42853;46732;82322;118629;134021;136221;140313;140315;151449;180163	2136;2137	195;574	-1;-1;-1;-1				F2
Q6UXB8	Q6UXB8	4	4	4	Peptidase inhibitor 16	PI16	sp|Q6UXB8|PI16_HUMAN Peptidase inhibitor 16 OS=Homo sapiens OX=9606 GN=PI16 PE=1 SV=1	1	4	4	4	8.2	8.2	8.2	49.471	463	463	0	9.7397	219490	163620	214460	109670	181790	202030	98202	181830	207110	195310	441960000	6				5278	28123;36591;45005;65106	True;True;True;True	30115;39180;39181;48788;70350	56508;56509;73966;73967;91973;132463	75950;75951;99434;99435;123425;177474	75950;99435;123425;177474	4955	36	-1				PI16
A0A087X0I2;G3XAM2;E7ETH0;A0A2R8Y3M9;P05156;D6R9Z8;CON__Q32PI4	A0A087X0I2;G3XAM2;E7ETH0;A0A2R8Y3M9;P05156;D6R9Z8	6;6;6;6;6;4;2	6;6;6;6;6;4;2	6;6;6;6;6;4;2	Complement factor I;Complement factor I heavy chain;Complement factor I light chain	CFI	tr|A0A087X0I2|A0A087X0I2_HUMAN Complement factor I OS=Homo sapiens OX=9606 GN=CFI PE=1 SV=1;tr|G3XAM2|G3XAM2_HUMAN Complement factor I OS=Homo sapiens OX=9606 GN=CFI PE=1 SV=1;tr|E7ETH0|E7ETH0_HUMAN Complement factor I OS=Homo sapiens OX=9606 GN=CFI PE=1 S	7	6	6	6	17.2	17.2	17.2	42.519	378	378;576;591;631;583;161;618	0	22.083	111710	194600	246510	119260	182820	145010	124710	150490	184810	167500	200440000	7				185	12510;23241;26065;37159;64403;64404	True;True;True;True;True;True	13421;24883;27917;39777;69601;69602	24728;45764;51783;74932;130873;130874	33076;61577;69633;100687;100688;175328;175329	33076;61577;69633;100687;175328;175329			-1;-1;-1;-1;-1;-1;-1				CFI
Q6ZMP0	Q6ZMP0	2	2	2	Thrombospondin type-1 domain-containing protein 4	THSD4	sp|Q6ZMP0|THSD4_HUMAN Thrombospondin type-1 domain-containing protein 4 OS=Homo sapiens OX=9606 GN=THSD4 PE=2 SV=2	1	2	2	2	1.8	1.8	1.8	112.45	1018	1018	0.005177	1.4515	10173	19593	11864	7874.5	6973.7	8290.2	7805.3	8918.5	9382.9	8604.7	13851000	2				5297	7394;53841	True;True	7932;58207	14794;109260	19814;146084	19814;146084			-1				THSD4
H0Y996;H3BMR1;Q8WUR7;H0Y9H8;H3BQZ5	H0Y996;H3BMR1;Q8WUR7;H0Y9H8;H3BQZ5	2;2;2;1;1	2;2;2;1;1	2;2;2;1;1	UPF0235 protein C15orf40	C15orf40	tr|H0Y996|H0Y996_HUMAN UPF0235 protein C15orf40 (Fragment) OS=Homo sapiens OX=9606 GN=C15orf40 PE=1 SV=2;tr|H3BMR1|H3BMR1_HUMAN UPF0235 protein C15orf40 (Fragment) OS=Homo sapiens OX=9606 GN=C15orf40 PE=1 SV=1;sp|Q8WUR7|CO040_HUMAN UPF0235 protein C15orf40	5	2	2	2	30.5	30.5	30.5	9.9224	95	95;146;153;36;68	0	5.5803	27547	52551	32584	17902	27856	26011	17222	36027	54114	28200	295490000	2				1974	35789;54041	True;True	38314;58421	72404;109605	97318;146515	97318;146515			-1;-1;-1;-1;-1				C15orf40
P05106;H3BM21;I3L4X8	P05106;H3BM21;I3L4X8	8;8;4	8;8;4	8;8;4	Integrin beta-3;Integrin beta	ITGB3	sp|P05106|ITB3_HUMAN Integrin beta-3 OS=Homo sapiens OX=9606 GN=ITGB3 PE=1 SV=2;tr|H3BM21|H3BM21_HUMAN Integrin beta (Fragment) OS=Homo sapiens OX=9606 PE=3 SV=1;tr|I3L4X8|I3L4X8_HUMAN Integrin beta OS=Homo sapiens OX=9606 GN=ITGB3 PE=3 SV=1	3	8	8	8	12.6	12.6	12.6	87.057	788	788;787;443	0	49.753	72148	99087	151980	60600	71141	79755	60425	80857	89051	74933	240000000	9				2053	10318;14266;21061;24574;26966;28144;41534;65750	True;True;True;True;True;True;True;True	11091;15275;22561;26322;28899;30139;45085;71035	20431;28047;41557;41558;48385;54303;56545;85445;133589	27251;37576;55997;55998;65062;72979;75997;114819;178928	27251;37576;55998;65062;72979;75997;114819;178928			-1;-1;-1				ITGB3
H3BN02;P20702	H3BN02;P20702	9;9	8;8	8;8	Integrin alpha-X	ITGAX	tr|H3BN02|H3BN02_HUMAN Integrin alpha-X OS=Homo sapiens OX=9606 GN=ITGAX PE=1 SV=1;sp|P20702|ITAX_HUMAN Integrin alpha-X OS=Homo sapiens OX=9606 GN=ITGAX PE=1 SV=3	2	9	8	8	7.1	6.2	6.2	128.54	1169	1169;1163	0	23.845	195970	300580	211490	173730	189990	201860	176880	172640	245900	209990	638330000	9				2063	4941;5645;6161;22572;27200;29296;38530;59018;67458	True;True;True;False;True;True;True;True;True	5327;6086;6630;24176;29144;31384;41223;63751;72855	10191;11676;12645;44458;54831;59277;77727;77728;119735;136950	13811;15746;17061;59889;73663;79894;104589;104590;160329;183440	13811;15746;17061;59889;73663;79894;104589;160329;183440			-1;-1				ITGAX
B8ZZT4;Q9BV40	B8ZZT4;Q9BV40	2;2	2;2	2;2	Vesicle-associated membrane protein 8	VAMP8	tr|B8ZZT4|B8ZZT4_HUMAN Vesicle-associated membrane protein 8 OS=Homo sapiens OX=9606 GN=VAMP8 PE=1 SV=1;sp|Q9BV40|VAMP8_HUMAN Vesicle-associated membrane protein 8 OS=Homo sapiens OX=9606 GN=VAMP8 PE=1 SV=1	2	2	2	2	23.2	23.2	23.2	11.191	99	99;100	0.0051799	1.4561	8195.5	11332	12820	6838.3	9271.3	9138.1	9077.8	9724	12938	9540.5	33972000	2				1198	40027;42328	True;True	42933;45916	80937;86846	108960;116661	108960;116661			-1;-1				VAMP8
P02649;H0Y7L5;E9PEV4;E7ERP7;CON__Q03247	P02649;H0Y7L5;E9PEV4;E7ERP7	24;17;14;14;3	24;17;14;14;3	24;17;14;14;3	Apolipoprotein E	APOE	sp|P02649|APOE_HUMAN Apolipoprotein E OS=Homo sapiens OX=9606 GN=APOE PE=1 SV=1;tr|H0Y7L5|H0Y7L5_HUMAN Apolipoprotein E (Fragment) OS=Homo sapiens OX=9606 GN=APOE PE=1 SV=2;tr|E9PEV4|E9PEV4_HUMAN Apolipoprotein E (Fragment) OS=Homo sapiens OX=9606 GN=APOE	5	24	24	24	65.9	65.9	65.9	36.154	317	317;269;216;219;316	0	200.35	1202300	2301800	1467900	1031100	1807700	1241100	1240400	1452900	1649200	1351900	13303000000	67				3033	719;3639;3640;4615;7675;7676;10819;10820;15663;22086;22087;33168;33369;33865;34581;34903;37181;40051;47448;51418;55311;60947;63330;65165	True;True;True;True;True;True;True;True;True;True;True;True;True;True;True;True;True;True;True;True;True;True;True;True	765;3885;3886;4987;8229;8230;11621;11622;16756;23656;23657;23658;35540;35751;36280;37034;37035;37374;39801;42971;42972;51424;55614;59757;65840;68455;70409	1402;1403;1404;7535;7536;9624;15239;15240;15241;21411;21412;21413;30849;43547;43548;43549;43550;43551;43552;43553;43554;43555;43556;43557;43558;67262;67592;67593;68709;70041;70042;70043;70687;74971;81006;81007;96754;104912;104913;104914;111915;123843;123844;123845;123846;128961;132548	1918;1919;1920;1921;10292;10293;10294;13073;20363;20364;20365;20366;28583;28584;28585;28586;41334;58697;58698;58699;58700;58701;58702;58703;58704;58705;58706;58707;58708;58709;58710;58711;58712;58713;58714;58715;90221;90632;90633;92330;92331;94202;94203;94204;94205;95059;100743;100744;109043;109044;129822;140453;140454;140455;140456;140457;140458;140459;149549;165944;165945;165946;165947;165948;1…	1918;10293;10294;13073;20364;20366;28583;28584;41334;58710;58715;90221;90632;92330;94204;95059;100744;109043;129822;140454;149549;165946;172860;177582	2186;2187;2188	126;143;290	-1;-1;-1;-1;-1				APOE
R4GN98;P06703	R4GN98;P06703	9;9	9;9	9;9	Protein S100;Protein S100-A6	S100A6	tr|R4GN98|R4GN98_HUMAN Protein S100 (Fragment) OS=Homo sapiens OX=9606 GN=S100A6 PE=1 SV=1;sp|P06703|S10A6_HUMAN Protein S100-A6 OS=Homo sapiens OX=9606 GN=S100A6 PE=1 SV=1	2	9	9	9	54.1	54.1	54.1	9.681	85	85;90	0	16.763	2442100	2856300	2347400	1380500	2175700	1696700	1517700	2096400	2218600	2462600	52966000000	71				3136	14000;15459;15831;15832;31371;36505;36506;37247;67237	True;True;True;True;True;True;True;True;True	14988;16537;16932;16933;33615;39054;39055;39056;39057;39868;72618	27487;30480;31158;31159;31160;31161;31162;31163;31164;31165;63442;63443;73659;73660;73661;73662;73663;73664;73665;73666;73667;73668;73669;73670;73671;73672;73673;73674;73675;73676;73677;73678;73679;75086;75087;75088;75089;75090;75091;75092;75093;75094;136560	36802;40835;40836;40837;41749;41750;41751;41752;41753;41754;41755;41756;41757;41758;41759;41760;41761;41762;41763;41764;85329;85330;85331;98999;99000;99001;99002;99003;99004;99005;99006;99007;99008;99009;99010;99011;99012;99013;99014;99015;99016;99017;99018;99019;99020;99021;99022;99023;99024;99025;99026;99027;99028;99029;99030;100907;100908;100909;100910;100911;100912;100913;100914;100915;100916…	36802;40836;41759;41764;85329;99006;99029;100913;182950	2339	57	-1;-1				S100A6
A0A0A0MTC7;A0A0A0MQS9;Q16363;A0A494C139;H0YAP9;A0A494C1K8;H0Y351;H0YAQ5;E5RFQ2	A0A0A0MTC7;A0A0A0MQS9;Q16363	30;30;30;12;5;5;4;4;4	30;30;30;12;5;5;4;4;4	30;30;30;12;5;5;4;4;4	Laminin subunit alpha-4	LAMA4	tr|A0A0A0MTC7|A0A0A0MTC7_HUMAN Laminin subunit alpha-4 OS=Homo sapiens OX=9606 GN=LAMA4 PE=1 SV=1;tr|A0A0A0MQS9|A0A0A0MQS9_HUMAN Laminin subunit alpha-4 OS=Homo sapiens OX=9606 GN=LAMA4 PE=1 SV=1;sp|Q16363|LAMA4_HUMAN Laminin subunit alpha-4 OS=Homo sapien	9	30	30	30	16.9	16.9	16.9	201.82	1816	1816;1823;1823;1064;188;190;178;187;331	0	157.42	962450	2176800	1784300	1212200	1346900	1220800	1176700	1008500	1063600	1118900	4750900000	55				244	675;1829;1830;2109;2673;4758;6726;6727;7062;7702;8503;16253;27890;27891;29588;29651;29830;30737;31551;32621;40408;40617;41620;46646;47053;48368;60564;61183;65993;66340	True;True;True;True;True;True;True;True;True;True;True;True;True;True;True;True;True;True;True;True;True;True;True;True;True;True;True;True;True;True	718;1963;1964;2254;2853;5136;7231;7232;7588;8256;9103;17446;29873;29874;31700;31765;31959;32944;33817;34951;43471;43472;43781;43782;45178;50535;51001;52391;65429;66096;71301;71670	1311;1312;1313;3941;3942;3943;3944;3945;3946;3947;3948;4437;5663;9862;13738;13739;14285;15279;15280;16769;32076;56026;56027;56028;59865;59866;59971;60326;62089;63891;63892;63893;66073;81926;81927;82601;82602;82603;85612;95224;95225;96095;98527;98528;123098;124342;134102;134718	1794;1795;1796;5536;5537;5538;5539;5540;5541;5542;5543;5544;5545;5546;5547;6196;7802;13372;18516;18517;19179;20413;20414;22389;22390;43007;75225;75226;75227;80738;80739;80870;81342;83630;85884;85885;85886;88635;110212;110213;111102;111103;111104;115045;115046;127869;127870;128987;132197;132198;164935;166605;179670;179671;180460	1794;5537;5546;6196;7802;13372;18516;18517;19179;20414;22390;43007;75225;75227;80739;80870;81342;83630;85886;88635;110212;111104;115046;127869;128987;132198;164935;166605;179670;180460	193;194;195;196;197	339;395;498;888;1142	-1;-1;-1;-1;-1;-1;-1;-1;-1				LAMA4
P48552	P48552	2	1	1	Nuclear receptor-interacting protein 1	NRIP1	sp|P48552|NRIP1_HUMAN Nuclear receptor-interacting protein 1 OS=Homo sapiens OX=9606 GN=NRIP1 PE=1 SV=2	1	2	1	1	1.6	0.9	0.9	126.94	1158	1158	0.0053065	1.4309	71692	261800	104030	35943	66805	90720	27279	181920	331820	106460	446430000	3				3912	38045;63120	True;False	40709;68231	76837;128541	103387;103388;103389;172249	103387;172249	3580	106	-1				NRIP1
Q8IY42	Q8IY42	1	1	1	Uncharacterized protein C4orf19	C4orf19	sp|Q8IY42|CD019_HUMAN Uncharacterized protein C4orf19 OS=Homo sapiens OX=9606 GN=C4orf19 PE=1 SV=1	1	1	1	1	3.2	3.2	3.2	33.741	314	314	0.0016136	2.1415	11391	15389	11066	13332	16923	15479	15586	9767.7	15312	15788	22693000	1				5570	33341	TRUE	35723	67533	90550	90550			-1				C4orf19
Q04609;Q9HBA9;E9PKM3;E9PMK6	Q04609;Q9HBA9	12;7;2;2	12;7;2;2	12;7;2;2	Glutamate carboxypeptidase 2;Putative N-acetylated-alpha-linked acidic dipeptidase	FOLH1;FOLH1B	sp|Q04609|FOLH1_HUMAN Glutamate carboxypeptidase 2 OS=Homo sapiens OX=9606 GN=FOLH1 PE=1 SV=1;sp|Q9HBA9|FOH1B_HUMAN Putative N-acetylated-alpha-linked acidic dipeptidase OS=Homo sapiens OX=9606 GN=FOLH1B PE=2 SV=1	4	12	12	12	16.5	16.5	16.5	84.33	750	750;442;64;74	0	29.76	480270	456390	413310	386500	323460	406730	432960	285430	427880	386320	930070000	21				4424	2009;2027;15488;21238;30811;32417;34942;41412;46173;53500;54465;55421	True;True;True;True;True;True;True;True;True;True;True;True	2153;2171;16567;22749;33022;34737;37414;44953;50041;57848;58867;59873	4278;4300;4301;30540;30541;41914;62236;65656;70782;85233;85234;94394;108688;110346;112137;112138;112139	5981;6009;6010;6011;6012;6013;40927;40928;56483;83826;88091;95204;114557;114558;126757;145365;145366;147469;149859;149860;149861	5981;6011;40928;56483;83826;88091;95204;114557;126757;145365;147469;149860			-1;-1;-1;-1				FOLH1;FOLH1B
Q969Z0;C9J7P5;H7C4R5;C9J5A2;C9J347;C9IZN7	Q969Z0	6;2;2;1;1;1	6;2;2;1;1;1	6;2;2;1;1;1	Protein TBRG4	TBRG4	sp|Q969Z0|FAKD4_HUMAN FAST kinase domain-containing protein 4 OS=Homo sapiens OX=9606 GN=TBRG4 PE=1 SV=1	6	6	6	6	8.6	8.6	8.6	70.737	631	631;248;274;118;128;283	0	5.6198	148870	125900	141480	177040	123910	144830	138310	311890	161840	187740	283210000	6				6002	10693;15698;15730;30943;38159;65163	True;True;True;True;True;True	11492;16795;16829;33159;40826;70407	21173;30940;30993;62461;77064;132546	28273;41477;41540;84113;103690;177580	28273;41477;41540;84113;103690;177580			-1;-1;-1;-1;-1;-1				TBRG4
O94804;H0YB71	O94804	11;2	10;2	10;2	Serine/threonine-protein kinase 10	STK10	sp|O94804|STK10_HUMAN Serine/threonine-protein kinase 10 OS=Homo sapiens OX=9606 GN=STK10 PE=1 SV=1	2	11	10	10	12.7	11.8	11.8	112.13	968	968;281	0	26.587	230330	370250	352460	237660	307230	282780	261830	248630	321940	340310	394950000	13				2830	3269;3330;5385;11374;25877;32663;38066;45683;46530;47988;51077	True;True;True;True;True;False;True;True;True;True;True	3494;3561;5801;12212;27716;34995;40730;49521;50412;51989;55258	6903;7010;11117;11118;22552;51317;66135;76870;93355;95053;97822;97823;104308;104309	9465;9620;15011;15012;30144;69038;88711;88712;103435;125393;127660;131261;131262;139641;139642	9465;9620;15011;30144;69038;88712;103435;125393;127660;131262;139641			-1;-1				STK10
S6FRS6;A0A2R8Y4K8;Q9NSI8	S6FRS6;A0A2R8Y4K8;Q9NSI8	2;2;2	1;1;1	1;1;1	SAM domain-containing protein SAMSN-1	SAMSN1	tr|S6FRS6|S6FRS6_HUMAN SAM domain, SH3 domain and nuclear localization signals 1 OS=Homo sapiens OX=9606 GN=SAMSN1 PE=1 SV=1;tr|A0A2R8Y4K8|A0A2R8Y4K8_HUMAN SAM domain-containing protein SAMSN-1 OS=Homo sapiens OX=9606 GN=SAMSN1 PE=1 SV=1;sp|Q9NSI8|SAMN1_HU	3	2	1	1	7.9	2.6	2.6	34.178	304	304;669;373	0.0014758	2.228	23273	25310	26112	17042	21295	19857	23829	21501	28682	22710	20041000	1				666	53932;61697	True;False	58302;66649	109418;125450	146276;168070	146276;168070			-1;-1;-1				SAMSN1
Q96EN8	Q96EN8	1	1	1	Molybdenum cofactor sulfurase	MOCOS	sp|Q96EN8|MOCOS_HUMAN Molybdenum cofactor sulfurase OS=Homo sapiens OX=9606 GN=MOCOS PE=1 SV=2	1	1	1	1	1.2	1.2	1.2	98.119	888	888	1	-2	153400	217770	114010	106630	141340	99198	106560	119320	154540	102290	538550000	3	+			6080	26311	TRUE	28180	52395;52396;52397	70383;70384;70385	70385	5279	439	-1				MOCOS
G5E9F8;A0A3B3ISJ1;A0A0S2Z4L3;P07225;A0A3B3IRK9;C9K0R0;A0A3B3IUA6	G5E9F8;A0A3B3ISJ1;A0A0S2Z4L3;P07225;A0A3B3IRK9	7;7;7;7;4;1;1	7;7;7;7;4;1;1	7;7;7;7;4;1;1	Vitamin K-dependent protein S	PROS1	tr|G5E9F8|G5E9F8_HUMAN Vitamin K-dependent protein S OS=Homo sapiens OX=9606 GN=PROS1 PE=1 SV=2;tr|A0A3B3ISJ1|A0A3B3ISJ1_HUMAN Vitamin K-dependent protein S OS=Homo sapiens OX=9606 GN=PROS1 PE=1 SV=1;tr|A0A0S2Z4L3|A0A0S2Z4L3_HUMAN Vitamin K-dependent prote	7	7	7	7	11	11	11	73.473	661	661;662;708;676;556;57;103	0	14.145	202850	305190	436810	167480	252240	229030	234960	264750	226330	262550	494140000	8				509	5201;27927;42344;42984;46313;47765;60979	True;True;True;True;True;True;True	5604;29912;45935;46640;50187;51755;65876	10795;56146;86872;88193;94650;97352;97353;123921	14616;75455;116692;118388;127094;130637;130638;166050	14616;75455;116692;118388;127094;130638;166050			-1;-1;-1;-1;-1;-1;-1				PROS1
Q9NYN1	Q9NYN1	2	2	2	Ras-like protein family member 12	RASL12	sp|Q9NYN1|RASLC_HUMAN Ras-like protein family member 12 OS=Homo sapiens OX=9606 GN=RASL12 PE=1 SV=1	1	2	2	2	9	9	9	29.662	266	266	0	6.446	30033	38400	36222	31601	37106	32323	33463	38051	96268	33007	106450000	2				6923	3697;53618	True;True	3949;57974	7657;108890	10436;145610	10436;145610			-1				RASL12
Q8IY33	Q8IY33	7	7	7	MICAL-like protein 2	MICALL2	sp|Q8IY33|MILK2_HUMAN MICAL-like protein 2 OS=Homo sapiens OX=9606 GN=MICALL2 PE=1 SV=1	1	7	7	7	10.6	10.6	10.6	97.501	904	904	0	44.35	53980	81334	64054	57614	71334	78553	85682	58253	69896	92315	116730000	7				5568	5157;5658;31419;33872;44810;48546;49357	True;True;True;True;True;True;True	5555;6100;33673;36287;48579;52579;53435	10693;11704;63580;68717;91534;98912;100655	14478;15782;85507;92341;122809;132689;134828	14478;15782;85507;92341;122809;132689;134828			-1				MICALL2
D9J307;S6AU73;A0A140TA13;A0A140T9S9;A0A140T9G0;A0A140T953;A0A140TA02;A0A1W2PNR7	D9J307;S6AU73;A0A140TA13;A0A140T9S9;A0A140T9G0;A0A140T953	11;9;6;6;6;6;4;4	5;4;3;3;3;3;2;2	2;2;1;2;2;1;1;1		HLA-B	tr|D9J307|D9J307_HUMAN HLA class I antigen OS=Homo sapiens OX=9606 GN=HLA-B PE=1 SV=1;tr|S6AU73|S6AU73_HUMAN HLA class I histocompatibility antigen OS=Homo sapiens OX=9606 GN=HLA-B PE=1 SV=1;tr|A0A140TA13|A0A140TA13_HUMAN HLA class I histocompatibility ant	8	11	5	2	38.1	19.1	8.8	40.388	362	362;362;224;241;241;246;224;253	0	51.341	127450	265740	163890	159650	226540	142010	224110	159530	238180	171210	1631500000	11				1433	4571;8796;8798;18878;19391;22613;22681;41243;65058;66162;67352	False;False;True;True;False;True;True;False;False;True;False	4940;9418;9420;20218;20772;24220;24289;44761;70300;71482;72740	9510;9511;17340;17347;17348;17349;37184;38197;44526;44641;84861;132385;132386;132387;134415;136763	12902;12903;23174;23183;23184;23185;23186;23187;23188;50063;50064;51404;59975;60122;114107;177382;177383;177384;177385;177386;177387;180087;183209	12903;23174;23184;50063;51404;59975;60122;114107;177382;180087;183209			-1;-1;-1;-1;-1;-1;-1;-1				HLA-B
P25311;C9JEV0	P25311;C9JEV0	9;6	9;6	9;6	Zinc-alpha-2-glycoprotein	AZGP1	sp|P25311|ZA2G_HUMAN Zinc-alpha-2-glycoprotein OS=Homo sapiens OX=9606 GN=AZGP1 PE=1 SV=2;tr|C9JEV0|C9JEV0_HUMAN Zinc-alpha-2-glycoprotein OS=Homo sapiens OX=9606 GN=AZGP1 PE=1 SV=1	2	9	9	9	30.9	30.9	30.9	34.258	298	298;227	0	24.108	175220	323230	335750	169670	334780	239990	194370	259720	262710	252190	554970000	10				3584	4994;6617;7136;42291;45135;48043;48044;54341;67711	True;True;True;True;True;True;True;True;True	5383;7116;7663;45877;48936;52048;52049;58735;73123	10315;13550;14383;86781;92261;97942;97943;97944;110149;137407	13973;18279;19305;116568;123825;131420;131421;131422;147228;184019	13973;18279;19305;116568;123825;131420;131422;147228;184019			-1;-1				AZGP1
B4DLR8;P15559;H3BNV2;H3BRK3	B4DLR8;P15559;H3BNV2;H3BRK3	13;13;12;7	13;13;12;7	13;13;12;7	NAD(P)H dehydrogenase [quinone] 1	NQO1	tr|B4DLR8|B4DLR8_HUMAN NAD(P)H dehydrogenase [quinone] 1 OS=Homo sapiens OX=9606 GN=NQO1 PE=1 SV=1;sp|P15559|NQO1_HUMAN NAD(P)H dehydrogenase [quinone] 1 OS=Homo sapiens OX=9606 GN=NQO1 PE=1 SV=1;tr|H3BNV2|H3BNV2_HUMAN NAD(P)H dehydrogenase [quinone] 1 OS=	4	13	13	13	44.1	44.1	44.1	22.793	202	202;274;253;269	0	28.881	813270	1306900	1601000	636290	483430	1194800	453100	1046900	1462300	617730	5520400000	27				1116	3555;12048;12049;14111;18131;18132;19245;29649;29650;31536;31537;35580;52451	True;True;True;True;True;True;True;True;True;True;True;True;True	3799;12927;12928;15106;19433;19434;20613;31763;31764;33801;33802;38093;56712	7395;7396;7397;23792;23793;23794;23795;27705;35668;35669;37925;59969;59970;63858;63859;63860;63861;63862;72034;106733;106734;106735	10112;10113;10114;10115;31805;31806;31807;31808;31809;37078;47960;47961;47962;47963;51045;80868;80869;85850;85851;85852;85853;85854;96870;142830;142831;142832;142833	10112;31806;31807;37078;47961;47963;51045;80868;80869;85850;85852;96870;142832			-1;-1;-1;-1				NQO1
G3V5P0	G3V5P0	7	1	1		KTN1	tr|G3V5P0|G3V5P0_HUMAN Kinectin (Fragment) OS=Homo sapiens OX=9606 GN=KTN1 PE=1 SV=1	1	7	1	1	54.4	5	5	18.469	160	160	1	-2	65912	49594	62608	45701	58891	35805	58850	40906	43855	51442	658380000	4	+			1899	12402;12782;35587;46881;47417;55046;55113	True;False;False;False;False;False;False	13305;13704;13705;38100;50808;50809;51391;59475;59545	24521;24522;24523;25230;25231;25232;72050;95757;95758;95759;96707;111327;111328;111329;111454	32814;32815;32816;32817;33743;33744;33745;96889;128568;128569;128570;129765;148779;148780;148781;148782;148948	32815;33743;96889;128570;129765;148780;148948	1343;1344	67;139	-1				KTN1
Q5VY30;P02753	Q5VY30;P02753	4;4	4;4	4;4	Retinol-binding protein 4;Plasma retinol-binding protein(1-182);Plasma retinol-binding protein(1-181);Plasma retinol-binding protein(1-179);Plasma retinol-binding protein(1-176)	RBP4	tr|Q5VY30|Q5VY30_HUMAN Retinol-binding protein OS=Homo sapiens OX=9606 GN=RBP4 PE=1 SV=2;sp|P02753|RET4_HUMAN Retinol-binding protein 4 OS=Homo sapiens OX=9606 GN=RBP4 PE=1 SV=3	2	4	4	4	24.6	24.6	24.6	22.974	199	199;201	0	8.9871	59212	89115	115910	58550	94939	56225	70247	75372	94753	93957	250180000	4				3049	20332;23714;62074;67602	True;True;True;True	21781;25416;67061;73008	40020;46818;126348;137221	53867;62994;169339;183772	53867;62994;169339;183772			-1;-1				RBP4
Q8IVN8	Q8IVN8	5	5	5	Somatomedin-B and thrombospondin type-1 domain-containing protein	SBSPON	sp|Q8IVN8|SBSPO_HUMAN Somatomedin-B and thrombospondin type-1 domain-containing protein OS=Homo sapiens OX=9606 GN=SBSPON PE=1 SV=2	1	5	5	5	29.9	29.9	29.9	29.61	264	264	0	60.284	179850	316460	312160	178680	214300	262260	222810	223510	234300	207610	880140000	13				5525	6767;14401;50222;55195;64948	True;True;True;True;True	7275;15417;15418;54352;59637;70186	13808;13809;13810;13811;28345;28346;102509;111636;132199	18603;18604;18605;18606;18607;37968;37969;137141;149192;149193;149194;177136;177137	18604;37969;137141;149193;177137	5067	210	-1				SBSPON
P24043;A0A087WX80;A0A087WYF1;A0A2R8YDM5	P24043;A0A087WX80;A0A087WYF1	88;87;86;2	88;87;86;2	87;86;85;2	Laminin subunit alpha-2	LAMA2	sp|P24043|LAMA2_HUMAN Laminin subunit alpha-2 OS=Homo sapiens OX=9606 GN=LAMA2 PE=1 SV=4;tr|A0A087WX80|A0A087WX80_HUMAN Laminin subunit alpha-2 OS=Homo sapiens OX=9606 GN=LAMA2 PE=1 SV=1;tr|A0A087WYF1|A0A087WYF1_HUMAN Laminin subunit alpha-2 OS=Homo sapien	4	88	88	87	31.4	31.4	31.1	343.9	3122	3122;3121;3118;184	0	323.31	2738800	4846800	4589100	3650200	4013400	4206900	3528900	2518600	2789400	3561200	13533000000	164				3567	884;1407;2542;5050;5885;6716;7064;7193;7251;7367;7398;7699;9198;9644;11935;13627;14200;14955;15237;15238;15456;16292;20471;21297;21345;21357;21946;22778;23030;24836;24932;25050;25351;25374;25375;25533;25646;25861;26424;26564;27454;27839;28436;29253;29290;29944;30559;31182;31843;32949;34337;34543;36521;36964;39018;39909;41718;42575;42576;43146;43520;43794;44358;44802;45616;46058;49944;51662;51922;…	True;True;True;True;True;True;True;True;True;True;True;True;True;True;True;True;True;True;True;True;True;True;True;True;True;True;True;True;True;True;True;True;True;True;True;True;True;True;True;True;True;True;True;True;True;True;True;True;True;True;True;True;True;True;True;True;True;True;True;True;True;True;True;True;True;True;True;True;True;True;True;True;True;True;True;True;True;True;True;True…	942;1501;2714;5440;6338;7220;7590;7720;7785;7904;7936;8253;9847;10321;12805;14598;15208;16011;16310;16311;16534;17485;21924;22812;22861;22873;23510;24391;24664;26597;26697;26820;26821;27146;27170;27171;27341;27466;27699;27700;28298;28299;28468;29413;29818;30453;31338;31378;32082;32083;32753;33415;34126;35304;36784;36993;39077;39078;39573;41744;42759;42760;45279;46177;46178;46812;47216;47509;48107…	1765;2871;2872;5374;10437;12116;13721;13722;14287;14471;14569;14747;14799;15275;18152;18153;18154;18155;19063;19064;23570;26800;27947;27948;29531;30077;30078;30079;30476;32121;32122;40378;40379;41999;42072;42073;42092;43273;43274;44821;45353;48877;49091;49092;49323;49324;49325;50054;50088;50089;50420;50672;51260;51261;51262;52741;52742;52743;53131;53132;55271;55272;55923;57465;57466;59208;59269;5…	2414;3964;3965;3966;3967;7434;14123;16332;18496;18497;19181;19182;19410;19411;19534;19535;19760;19819;20409;24236;24237;24238;24239;25448;25449;31482;35862;35863;37441;37442;37443;39551;40258;40259;40260;40831;43055;43056;43057;54430;54431;56589;56687;56688;56711;58324;58325;60323;61037;65716;66027;66028;66029;66344;66345;66346;67403;67454;67455;67456;67888;68215;68963;68964;68965;70937;70938;709…	2414;3965;7434;14123;16332;18496;19182;19411;19534;19760;19819;20409;24237;25448;31482;35862;37442;39551;40258;40259;40831;43055;54430;56589;56688;56711;58325;60323;61037;65716;66028;66346;67403;67454;67455;67888;68215;68965;70938;71409;74229;75102;77468;79809;79887;81572;83224;84846;86783;89564;93691;94094;99054;100251;105746;108556;115263;117276;117279;118724;119728;120419;121775;122750;125249;…	3037;3038;3039;3040;3041;3042;3043	1291;1306;1359;1370;2805;2985;2998	-1;-1;-1;-1				LAMA2
Q01581;D6RIW1	Q01581	10;2	10;2	9;2	Hydroxymethylglutaryl-CoA synthase, cytoplasmic	HMGCS1	sp|Q01581|HMCS1_HUMAN Hydroxymethylglutaryl-CoA synthase, cytoplasmic OS=Homo sapiens OX=9606 GN=HMGCS1 PE=1 SV=2	2	10	10	9	26.3	26.3	24.2	57.293	520	520;95	0	56.605	416380	315100	436940	681460	412440	351130	342950	674240	522850	452720	1145000000	15				4389	5401;24945;28330;33775;34282;49849;56931;64273;65830;67385	True;True;True;True;True;True;True;True;True;True	5818;26710;30335;36182;36726;53957;61490;61491;69465;71127;72775	11146;49111;56910;68397;69567;101704;101705;115338;115339;130627;133765;136818	15047;66053;76480;91777;93581;136135;136136;136137;154349;154350;154351;174977;174978;179163;183274	15047;66053;76480;91777;93581;136136;154350;174977;179163;183274	4192;4193	198;427	-1;-1				HMGCS1
A0A087WW23;P20292	A0A087WW23;P20292	2;2	2;2	2;2	Arachidonate 5-lipoxygenase-activating protein	ALOX5AP	tr|A0A087WW23|A0A087WW23_HUMAN Arachidonate 5-lipoxygenase-activating protein OS=Homo sapiens OX=9606 GN=ALOX5AP PE=1 SV=1;sp|P20292|AL5AP_HUMAN Arachidonate 5-lipoxygenase-activating protein OS=Homo sapiens OX=9606 GN=ALOX5AP PE=1 SV=2	2	2	2	2	8.7	8.7	8.7	24.208	218	218;161	0.000162	3.5889	56398	86495	57223	38129	71309	57057	67144	68955	67902	68331	221290000	2				97	56917;58521	True;True	61474;63222	115312;118695	154318;158979	154318;158979			-1;-1				ALOX5AP
P02461;H7C435	P02461;H7C435	2;1	1;1	1;1	Collagen alpha-1(III) chain	COL3A1	sp|P02461|CO3A1_HUMAN Collagen alpha-1(III) chain OS=Homo sapiens OX=9606 GN=COL3A1 PE=1 SV=4;tr|H7C435|H7C435_HUMAN Collagen alpha-1(III) chain (Fragment) OS=Homo sapiens OX=9606 GN=COL3A1 PE=1 SV=1	2	2	1	1	2	1.2	1.2	138.56	1466	1466;90	0.0011972	2.3986	29824	57064	45346	38223	49680	34537	25228	25474	34041	36678	32636000	2				3027	21936;24146	True;False	23493;25869	43230;47612	58267;58268;64056	58267;64056	2168;2169	398;410	-1;-1				COL3A1
Q7Z449;E9PGH5	Q7Z449;E9PGH5	5;4	5;4	5;4	Cytochrome P450 2U1	CYP2U1	sp|Q7Z449|CP2U1_HUMAN Cytochrome P450 2U1 OS=Homo sapiens OX=9606 GN=CYP2U1 PE=1 SV=1;tr|E9PGH5|E9PGH5_HUMAN Cytochrome P450 2U1 OS=Homo sapiens OX=9606 GN=CYP2U1 PE=1 SV=1	2	5	5	5	7.2	7.2	7.2	61.986	544	544;335	0	5.5219	39706	45462	39185	28158	35175	33504	32526	33226	40128	42205	50022000	5				5394	4434;4825;18915;18916;61609	True;True;True;True;True	4796;5205;20258;20259;66553	9269;9994;37253;37254;125201	12607;13557;50146;50147;167753	12607;13557;50146;50147;167753			-1;-1				CYP2U1
H7BZ76;C9JD84;E7EV71;Q14766	H7BZ76;C9JD84;E7EV71;Q14766	2;2;2;2	2;2;2;2	2;2;2;2	Latent-transforming growth factor beta-binding protein 1	LTBP1	tr|H7BZ76|H7BZ76_HUMAN Latent-transforming growth factor beta-binding protein 1 (Fragment) OS=Homo sapiens OX=9606 GN=LTBP1 PE=1 SV=9;tr|C9JD84|C9JD84_HUMAN Latent-transforming growth factor beta-binding protein 1 OS=Homo sapiens OX=9606 GN=LTBP1 PE=1 SV=1	4	2	2	2	9.4	9.4	9.4	28.707	266	266;1340;1353;1721	0	4.6423	9566.2	11388	14612	7794.8	10177	10294	9097	9958.7	11652	10470	13459000	2				1268	7478;10573	True;True	8021;11363	14932;20959	19987;27995	19987;27995			-1;-1;-1;-1				LTBP1
P40121;E7ENU9;B8ZZL6;H7C0X8	P40121;E7ENU9;B8ZZL6	14;12;7;2	14;12;7;2	14;12;7;2	Macrophage-capping protein	CAPG	sp|P40121|CAPG_HUMAN Macrophage-capping protein OS=Homo sapiens OX=9606 GN=CAPG PE=1 SV=2;tr|E7ENU9|E7ENU9_HUMAN Macrophage-capping protein (Fragment) OS=Homo sapiens OX=9606 GN=CAPG PE=1 SV=1;tr|B8ZZL6|B8ZZL6_HUMAN Macrophage-capping protein (Fragment) OS	4	14	14	14	42.8	42.8	42.8	38.498	348	348;253;218;103	0	249.22	1289200	2159300	1860700	824180	1457700	1117700	1188600	1771400	2139700	1399800	20992000000	49				3794	4129;4948;4949;4990;8482;9648;9649;14209;14210;18140;44622;58883;63719;67058	True;True;True;True;True;True;True;True;True;True;True;True;True;True	4472;5335;5336;5337;5379;9078;10326;10327;15218;15219;19442;19443;48384;63603;68869;68870;72432	8675;8676;8677;8678;8679;10205;10206;10207;10208;10310;16713;16714;19071;19072;27969;27970;27971;27972;35690;35691;35692;91185;91186;119496;119497;119498;119499;129641;129642;129643;129644;129645;129646;129647;129648;129649;136229	11805;11806;11807;11808;11809;11810;13831;13832;13833;13834;13966;22318;22319;22320;22321;22322;25457;25458;25459;37476;37477;37478;37479;37480;37481;47993;47994;47995;122348;122349;160028;160029;160030;160031;160032;173694;173695;173696;173697;173698;173699;173700;173701;173702;173703;173704;173705;173706;182524	11805;13831;13834;13966;22320;25458;25459;37476;37481;47995;122348;160029;173703;182524	3424;3425;3426	107;220;261	-1;-1;-1;-1				CAPG
P29400;Q49AM6;H0Y998;H0Y9H0	P29400	5;2;1;1	3;2;1;1	3;2;1;1	Collagen alpha-5(IV) chain	COL4A5	sp|P29400|CO4A5_HUMAN Collagen alpha-5(IV) chain OS=Homo sapiens OX=9606 GN=COL4A5 PE=1 SV=2	4	5	3	3	4.3	2.9	2.9	161.04	1685	1685;695;115;174	0	4.6867	153600	145660	172020	163430	210040	167370	207150	122010	176920	135360	383110000	5				3650	2651;21556;21975;42077;50652	False;True;True;True;False	2830;23091;23540;45653;54805	5618;5619;42465;43333;86384;86385;86386;103380;103381	7753;7754;57212;58407;116055;116056;116057;138303;138304	7753;57212;58407;116055;138303			-1;-1;-1;-1				COL4A5
P98160;A0A0U1RQT3;H7BYA5;H0Y5A9;A0A3B3IT11;A0A2R8YH07	P98160	99;4;3;2;2;1	99;4;3;2;2;1	99;4;3;2;2;1	Basement membrane-specific heparan sulfate proteoglycan core protein;Endorepellin;LG3 peptide	HSPG2	sp|P98160|PGBM_HUMAN Basement membrane-specific heparan sulfate proteoglycan core protein OS=Homo sapiens OX=9606 GN=HSPG2 PE=1 SV=4	6	99	99	99	28.4	28.4	28.4	468.83	4391	4391;307;109;197;288;236	0	323.31	2805300	6017600	4892500	3349400	4175600	3361900	3524400	3158900	3320400	3648600	27644000000	205				4359	339;533;1644;1924;2270;2410;3423;3424;4008;4755;5498;5548;6207;6415;6728;6797;6910;6919;6936;7137;7308;7388;7395;7600;12910;14099;14105;16510;17055;17161;18771;18875;20292;20408;21354;22522;22597;22598;22599;22766;24089;24689;24825;26647;26690;27207;27872;27873;27917;29683;29778;30124;30268;33407;33926;35002;35143;35176;36311;36902;37092;37875;37910;37960;39321;39588;39636;41807;47033;47095;48577…	True;True;True;True;True;True;True;True;True;True;True;True;True;True;True;True;True;True;True;True;True;True;True;True;True;True;True;True;True;True;True;True;True;True;True;True;True;True;True;True;True;True;True;True;True;True;True;True;True;True;True;True;True;True;True;True;True;True;True;True;True;True;True;True;True;True;True;True;True;True;True;True;True;True;True;True;True;True;True;True…	348;564;1748;2062;2429;2430;2575;3662;3663;4284;5133;5923;5975;6678;6902;7233;7306;7430;7439;7456;7664;7842;7926;7933;8149;13839;15093;15100;17716;18282;18283;18393;20103;20215;21740;21861;22870;24126;24203;24204;24205;24378;25811;26439;26584;28561;28605;29153;29854;29855;29901;31801;31901;32294;32444;32445;35790;36344;37475;37627;37663;38850;39510;39707;40532;40570;40620;42065;42344;42392;45371;…	607;992;993;994;3340;3341;4125;4846;4847;4848;5118;7177;7178;8276;9857;9858;9859;11320;11321;11430;11431;11432;12737;12738;12739;12740;13149;13740;13741;13864;14061;14072;14073;14074;14097;14384;14385;14658;14783;14784;14795;15113;25451;25452;25453;25454;27670;27671;27689;27690;27691;32542;32543;33520;33521;33522;33523;33524;33674;36967;37180;39961;40175;42087;44377;44498;44499;44500;44501;44787;…	805;1316;1317;1318;4597;4598;5777;6724;6725;6726;6727;7096;7097;9826;9827;9828;11266;13367;13368;13369;15266;15267;15268;15409;15410;15411;15412;17199;17200;17201;17202;17734;18518;18519;18520;18521;18679;18907;18926;18927;18928;18929;18930;18960;19306;19307;19647;19648;19802;19803;19815;20203;34048;34049;34050;34051;34052;37029;37030;37031;37032;37033;37057;37058;37059;43681;43682;43683;44975;44…	805;1316;4597;5777;6725;7096;9826;9828;11266;13368;15268;15409;17200;17734;18519;18679;18907;18929;18960;19307;19648;19802;19815;20203;34050;37033;37059;43681;44980;45161;49777;50058;53790;54091;56705;59780;59937;59939;59940;60287;63919;65304;65654;71866;71962;73684;75181;75183;75435;80961;81193;82112;82422;90690;92460;95300;95655;95738;98567;100098;100529;102741;103008;103117;106559;107326;10742…	4126;4127;4128;4129	482;1819;2686;3700	-1;-1;-1;-1;-1;-1				HSPG2
P0C0L5;F5GXS0;A0A140TA44;A0A0G2JL54;A0A3B3ISA6	P0C0L5;F5GXS0;A0A140TA44;A0A0G2JL54;A0A3B3ISA6	52;51;51;51;35	52;51;51;51;35	1;1;1;1;1	Complement C4-B;Complement C4 beta chain;Complement C4-B alpha chain;C4a anaphylatoxin;C4b-B;C4d-B;Complement C4 gamma chain	C4B	sp|P0C0L5|CO4B_HUMAN Complement C4-B OS=Homo sapiens OX=9606 GN=C4B PE=1 SV=2;tr|F5GXS0|F5GXS0_HUMAN C4a anaphylatoxin OS=Homo sapiens OX=9606 GN=C4B PE=1 SV=1;tr|A0A140TA44|A0A140TA44_HUMAN C4a anaphylatoxin OS=Homo sapiens OX=9606 GN=C4A PE=1 SV=1;tr|A0A	5	52	52	1	30.3	30.3	0.5	192.75	1744	1744;1698;1698;1698;1296	0	323.31	2994700	4882100	5167000	2277800	4154300	3333100	4357200	4393000	3884100	2206700	25861000000	162				3241	82;1035;1496;1672;5403;6769;7462;9120;9577;13488;13957;16039;18545;19241;19242;22728;23163;23209;23235;23471;23950;24169;24277;24556;30352;30377;32571;34050;34930;35780;36752;37902;38852;40932;43050;44585;45876;48985;49122;52171;52216;56439;60619;61063;61077;61318;62635;63527;63528;64505;66515;67540	True;True;True;True;True;True;True;True;True;True;True;True;True;True;True;True;True;True;True;True;True;True;True;True;True;True;True;True;True;True;True;True;True;True;True;True;True;True;True;True;True;True;True;True;True;True;True;True;True;True;True;True	85;1108;1594;1778;1779;5820;7277;8004;9761;10254;14449;14942;17202;17203;19865;20609;20610;24339;24803;24850;24877;25125;25667;25894;26010;26301;32534;32560;34901;36472;37402;38305;39356;39357;40562;41567;44258;44259;46709;48345;49729;53038;53187;56416;56465;56466;60965;65487;65969;65984;66242;67665;68667;68668;69714;71852;72940	130;2082;2083;3068;3069;3070;3383;3384;3385;3386;11148;13813;13814;14910;14911;17963;17964;17965;17966;18930;18931;26561;26562;27409;27410;27411;31682;31683;31684;31685;31686;31687;36411;37918;37919;37920;37921;37922;44720;44721;45631;45632;45698;45745;46191;46192;47291;47292;47659;47852;48352;48353;61369;61417;61418;65972;65973;69025;69026;69027;70764;70765;72392;74264;74265;74266;76545;78302;78…	164;2863;2864;2865;2866;4237;4238;4239;4240;4241;4651;4652;4653;4654;4655;15049;15050;18609;18610;19963;19964;19965;23988;23989;23990;23991;25276;25277;35543;35544;36700;36701;36702;36703;36704;42440;42441;42442;42443;42444;42445;42446;42447;42448;42449;42450;48935;51034;51035;51036;51037;51038;51039;60212;60213;60214;61404;61405;61490;61554;62109;62110;63609;63610;64124;64373;65020;65021;65022;8…	164;2865;4238;4655;15050;18610;19963;23988;25276;35543;36703;42448;48935;51034;51036;60214;61404;61490;61554;62109;63609;64124;64373;65020;82686;82751;88490;92749;95184;97302;99804;102984;105346;112556;118536;122247;125978;133820;134164;142115;142276;153081;165068;166278;166308;166996;170746;173282;173283;175938;180904;183617	361;362;363;364;365;366	167;177;262;328;393;1281	-1;-1;-1;-1;-1				C4B
H7BY84;Q5T7U1;Q9Y5Q8;H0Y5D2	H7BY84;Q5T7U1;Q9Y5Q8;H0Y5D2	2;2;2;1	2;2;2;1	2;2;2;1	General transcription factor 3C polypeptide 5	GTF3C5	tr|H7BY84|H7BY84_HUMAN General transcription factor 3C polypeptide 5 OS=Homo sapiens OX=9606 GN=GTF3C5 PE=1 SV=2;tr|Q5T7U1|Q5T7U1_HUMAN General transcription factor 3C polypeptide 5 OS=Homo sapiens OX=9606 GN=GTF3C5 PE=1 SV=1;sp|Q9Y5Q8|TF3C5_HUMAN General	4	2	2	2	6.7	6.7	6.7	39.695	345	345;457;519;90	0.0079945	1.2605	9852.4	12300	10859	9566	12203	11980	12443	10109	15155	18672	32765000	2				2117	41571;45818	True;True	45122;49664	85520;93665	114921;125821	114921;125821			-1;-1;-1;-1				GTF3C5
Q16270	Q16270	3	3	3	Insulin-like growth factor-binding protein 7	IGFBP7	sp|Q16270|IBP7_HUMAN Insulin-like growth factor-binding protein 7 OS=Homo sapiens OX=9606 GN=IGFBP7 PE=1 SV=1	1	3	3	3	18.1	18.1	18.1	29.13	282	282	0	24.796	39275	35362	51257	19435	29295	30454	31074	43235	53341	22672	98634000	3				4852	2145;30431;54205	True;True;True	2295;32616;58594	4557;61527;109911	6347;82896;146907	6347;82896;146907			-1				IGFBP7
Q99584	Q99584	7	7	7	Protein S100-A13	S100A13	sp|Q99584|S10AD_HUMAN Protein S100-A13 OS=Homo sapiens OX=9606 GN=S100A13 PE=1 SV=1	1	7	7	7	56.1	56.1	56.1	11.471	98	98	0	25.282	1922100	1807700	1342900	983910	1030300	1271100	1124700	1298100	1328900	1106700	21513000000	42				6285	11077;11592;11593;15889;35335;52688;52689	True;True;True;True;True;True;True	11895;12439;12440;16990;37829;56967;56968	21902;21903;21904;21905;22912;22913;22914;22915;31267;71566;71567;71568;107190;107191;107192;107193;107194;107195;107196;107197;107198;107199	29217;29218;29219;29220;29221;29222;29223;30614;30615;30616;30617;30618;30619;30620;41893;96255;96256;96257;96258;96259;96260;96261;96262;96263;96264;96265;96266;96267;96268;96269;143426;143427;143428;143429;143430;143431;143432;143433;143434;143435;143436;143437	29217;30619;30620;41893;96259;143435;143437			-1				S100A13
Q6UX71	Q6UX71	7	7	7	Plexin domain-containing protein 2	PLXDC2	sp|Q6UX71|PXDC2_HUMAN Plexin domain-containing protein 2 OS=Homo sapiens OX=9606 GN=PLXDC2 PE=1 SV=1	1	7	7	7	14.9	14.9	14.9	59.582	529	529	0	27.59	119070	194780	141680	106810	143120	132400	120750	126910	154720	143500	463670000	11				5276	5466;10346;14865;29717;30780;57316;61451	True;True;True;True;True;True;True	5884;11119;15916;31837;32990;61922;66383	11247;20490;20491;29349;29350;60102;62173;116208;124896	15177;27333;27334;27335;39319;39320;81044;83733;155470;167368;167369	15177;27335;39320;81044;83733;155470;167368			-1				PLXDC2
Q96R05	Q96R05	6	6	6	Retinoid-binding protein 7	RBP7	sp|Q96R05|RET7_HUMAN Retinoid-binding protein 7 OS=Homo sapiens OX=9606 GN=RBP7 PE=1 SV=1	1	6	6	6	40.3	40.3	40.3	15.536	134	134	0	22.149	149380	177060	163170	109200	111950	144000	104180	122530	147610	121810	300490000	7				6223	25492;35129;53155;61332;61333;61334	True;True;True;True;True;True	27298;37610;37611;57451;66256;66257;66258	50362;71125;71126;107979;124643;124644;124645	67818;95630;95631;144460;167023;167024;167025	67818;95630;144460;167023;167024;167025	5368	120	-1				RBP7
Q9BQB6;H0YD56;I3L3B4;F8W9H0;E9PLN8	Q9BQB6;H0YD56	3;2;1;1;1	3;2;1;1;1	3;2;1;1;1	Vitamin K epoxide reductase complex subunit 1	VKORC1	sp|Q9BQB6|VKOR1_HUMAN Vitamin K epoxide reductase complex subunit 1 OS=Homo sapiens OX=9606 GN=VKORC1 PE=1 SV=1;tr|H0YD56|H0YD56_HUMAN Vitamin-K-epoxide reductase (warfarin-sensitive) (Fragment) OS=Homo sapiens OX=9606 PE=3 SV=1	5	3	3	3	12.9	12.9	12.9	18.234	163	163;121;104;149;166	0	10.049	118260	139120	137880	84651	101600	89455	95627	101390	118520	144150	117380000	3				6338	3247;32507;63410	True;True;True	3471;34834;68542	6876;65855;129102	9432;88351;173025	9432;88351;173025			-1;-1;-1;-1;-1				VKORC1
A0A4W8ZXM2;A0A0B4J1Y9	A0A4W8ZXM2;A0A0B4J1Y9	3;2	3;2	1;1		IGHV3-72	tr|A0A4W8ZXM2|A0A4W8ZXM2_HUMAN Immunoglobulin heavy variable 3-72 OS=Homo sapiens OX=9606 GN=IGHV3-72 PE=1 SV=1;sp|A0A0B4J1Y9|HV372_HUMAN Immunoglobulin heavy variable 3-72 OS=Homo sapiens OX=9606 GN=IGHV3-72 PE=3 SV=1	2	3	3	1	36.6	36.6	10.9	11.167	101	101;119	0	28.327	117890	193120	358160	116350	210030	137890	128730	177490	114980	117140	1518400000	9				859	18147;23246;56195	True;True;True	19451;24888;60707	35704;35705;35706;35707;35708;45771;113968	48009;48010;48011;48012;48013;48014;48015;61587;152526	48011;61587;152526			-1;-1				IGHV3-72
Q96BI3;Q5TB21	Q96BI3;Q5TB21	2;1	2;1	2;1	Gamma-secretase subunit APH-1A	APH1A	sp|Q96BI3|APH1A_HUMAN Gamma-secretase subunit APH-1A OS=Homo sapiens OX=9606 GN=APH1A PE=1 SV=1;tr|Q5TB21|Q5TB21_HUMAN Anterior pharynx defective 1 homolog A (C. elegans) (Fragment) OS=Homo sapiens OX=9606 GN=APH1A PE=1 SV=1	2	2	2	2	7.9	7.9	7.9	28.996	265	265;150	0	6.5754	59971	137020	81405	53430	58786	59978	37193	80261	138840	65205	72115000	3				6024	981;62874	True;True	1046;67963	1977;127979	2730;171497;171498	2730;171498			-1;-1				APH1A
P28330	P28330	4	4	4	Long-chain specific acyl-CoA dehydrogenase, mitochondrial	ACADL	sp|P28330|ACADL_HUMAN Long-chain specific acyl-CoA dehydrogenase, mitochondrial OS=Homo sapiens OX=9606 GN=ACADL PE=1 SV=2	1	4	4	4	10	10	10	47.655	430	430	0	9.8869	171600	194980	110570	70395	55584	63433	79812	107420	86104	119530	144010000	6				3636	36897;38513;59231;63506	True;True;True;True	39505;41206;63979;68644;68645	74487;74488;77703;120131;129270;129271	100081;100082;104560;160849;173235;173236	100082;104560;160849;173235	3138	418	-1				ACADL
P07360;A0A3B3ITY0;A0A3B3ITK5	P07360	4;1;1	4;1;1	4;1;1	Complement component C8 gamma chain	C8G	sp|P07360|CO8G_HUMAN Complement component C8 gamma chain OS=Homo sapiens OX=9606 GN=C8G PE=1 SV=3	3	4	4	4	25.2	25.2	25.2	22.277	202	202;41;65	0	13.349	84393	137910	161670	82872	102470	94645	75010	91669	91880	104190	1004200000	4				3160	1339;2482;46825;49705	True;True;True;True	1430;2651;50724;53804	2714;5250;95600;101387	3740;7264;128383;135728	3740;7264;128383;135728			-1;-1;-1				C8G
Q9UGN4;J3QKQ4	Q9UGN4;J3QKQ4	2;1	2;1	2;1	CMRF35-like molecule 8	CD300A	sp|Q9UGN4|CLM8_HUMAN CMRF35-like molecule 8 OS=Homo sapiens OX=9606 GN=CD300A PE=1 SV=2;tr|J3QKQ4|J3QKQ4_HUMAN CMRF35-like molecule 8 OS=Homo sapiens OX=9606 GN=CD300A PE=1 SV=1	2	2	2	2	10	10	10	33.2	299	299;169	0	15.094	9557.6	11702	9395.6	6384.9	9040.2	9569.3	9066.8	10800	15301	11794	34207000	3				7060	13280;59226	True;True	14235;63974	26157;120125	35006;160842;160843	35006;160843			-1;-1				CD300A
Q5VT97	Q5VT97	1	1	1	Rho GTPase-activating protein SYDE2	SYDE2	sp|Q5VT97|SYDE2_HUMAN Rho GTPase-activating protein SYDE2 OS=Homo sapiens OX=9606 GN=SYDE2 PE=1 SV=2	1	1	1	1	1.1	1.1	1.1	133.23	1194	1194	0.009816	1.1186	63319	49280	58831	37041	33948	133910	48737	65723	52174	65768	296530000	2				5105	40931	TRUE	44257	83688;83689	112544;112545	112544			-1				SYDE2
P10620;F5H7F6;F5H6X2;F5H760;F5GX73;F5H613	P10620;F5H7F6;F5H6X2	5;4;4;2;1;1	5;4;4;2;1;1	5;4;4;2;1;1	Microsomal glutathione S-transferase 1	MGST1	sp|P10620|MGST1_HUMAN Microsomal glutathione S-transferase 1 OS=Homo sapiens OX=9606 GN=MGST1 PE=1 SV=1;tr|F5H7F6|F5H7F6_HUMAN Microsomal glutathione S-transferase 1 (Fragment) OS=Homo sapiens OX=9606 GN=MGST1 PE=1 SV=1;tr|F5H6X2|F5H6X2_HUMAN Microsomal gl	6	5	5	5	31.6	31.6	31.6	17.598	155	155;77;80;106;42;46	0	20.238	307780	375700	327960	211740	347720	389850	337540	362730	371210	403090	1814700000	20				3273	30790;32478;40633;55926;61085	True;True;True;True;True	33000;34803;43813;43814;60414;65993	62198;62199;62200;65776;65777;82677;82678;82679;82680;82681;113432;113433;124128;124129;124130;124131	83771;83772;83773;88229;88230;111193;111194;111195;111196;111197;151812;151813;166323;166324;166325;166326;166327;166328;166329;166330	83772;88229;111197;151813;166323	2554;2555;2556	27;28;30	-1;-1;-1;-1;-1;-1				MGST1
Q5Y7D1	Q5Y7D1	4	1	1		HLA-DRB1	tr|Q5Y7D1|Q5Y7D1_HUMAN HLA class II histocompatibility antigen DR beta chain OS=Homo sapiens OX=9606 GN=HLA-DRB1 PE=1 SV=1	1	4	1	1	15.4	3	3	30.12	266	266	0.008386	1.2192	18107	27340	460.85	20488	23732	2288.2	20742	1781.7	2573	1361.3	74965000	1				5139	6395;18880;22755;64382	False;False;True;False	6877;20220;24367;69577	13094;13095;37186;44771;130843	17653;17654;17655;50066;60267;175292	17654;50066;60267;175292			-1				HLA-DRB1
Q8IWY4	Q8IWY4	2	2	1	Signal peptide, CUB and EGF-like domain-containing protein 1	SCUBE1	sp|Q8IWY4|SCUB1_HUMAN Signal peptide, CUB and EGF-like domain-containing protein 1 OS=Homo sapiens OX=9606 GN=SCUBE1 PE=1 SV=3	1	2	2	1	3.8	3.8	2	107.91	988	988	0	7.2799	22971	38417	29381	19883	25845	23076	21603	23045	22262	28131	20060000	2				5550	22630;47235	True;True	24237;51193	44549;96398	60001;129387	60001;129387			-1				SCUBE1
Q92686	Q92686	2	2	2	Neurogranin;NEUG(55-78)	NRGN	sp|Q92686|NEUG_HUMAN Neurogranin OS=Homo sapiens OX=9606 GN=NRGN PE=1 SV=1	1	2	2	2	19.2	19.2	19.2	7.6184	78	78	0	20.021	86086	94327	85731	94732	64187	45721	74266	165240	89558	67014	275360000	4				5939	23977;31698	True;True	25694;33974	47347;47348;64217;64218	63694;63695;86293;86294	63694;86293			-1				NRGN
REV__H7BZU8;REV__B5MCI8;REV__Q9UHP6	REV__H7BZU8;REV__B5MCI8;REV__Q9UHP6	1;1;1	1;1;1	1;1;1			tr|H7BZU8|H7BZU8_HUMAN Radial spoke head 14 homolog (Fragment) OS=Homo sapiens OX=9606 GN=RSPH14 PE=1 SV=1;tr|B5MCI8|B5MCI8_HUMAN Radial spoke head 14 homolog OS=Homo sapiens OX=9606 GN=RSPH14 PE=1 SV=1;sp|Q9UHP6|RSP14_HUMAN Radial spoke head 14 homolog OS	3	1	1	1	0	0	0	7.4636	67	67;108;348	1	-2	23106	24347	25922	18713	21659	24049	20971	18841	20391	17983	20128000	1	+	+		7465	3660	TRUE	3911	7587	10356	10356	6125;6126	39;44	-1;-1;-1
Q9BTE3	Q9BTE3	8	8	8	Mini-chromosome maintenance complex-binding protein	MCMBP	sp|Q9BTE3|MCMBP_HUMAN Mini-chromosome maintenance complex-binding protein OS=Homo sapiens OX=9606 GN=MCMBP PE=1 SV=2	1	8	8	8	12.8	12.8	12.8	72.979	642	642	0	26.406	64057	75367	72446	61187	121540	105340	74700	77403	78204	87374	1818200000	9				6387	2723;11647;23879;28427;35638;55363;63906;67165	True;True;True;True;True;True;True;True	2909;12495;25596;30443;38154;59813;69073;72543	5778;5779;23015;47158;57447;72146;112015;129989;136414	7935;7936;30764;63446;77443;97006;149692;174129;182763	7935;30764;63446;77443;97006;149692;174129;182763	5470	174	-1				MCMBP
P02760;S4R471;S4R3Y4	P02760	7;3;2	7;3;2	7;3;2	Protein AMBP;Alpha-1-microglobulin;Inter-alpha-trypsin inhibitor light chain;Trypstatin	AMBP	sp|P02760|AMBP_HUMAN Protein AMBP OS=Homo sapiens OX=9606 GN=AMBP PE=1 SV=1	3	7	7	7	27.8	27.8	27.8	38.999	352	352;193;238	0	27.268	174170	212400	295230	152920	244230	186460	214700	212670	232750	227280	632420000	10				3050	7569;17588;18350;21745;25142;31222;59217	True;True;True;True;True;True;True	8115;18854;19663;23290;26918;33458;63965	15065;34485;36067;42840;49514;63124;120110	20148;46267;48485;48486;57725;66600;66601;84944;160822;160823	20148;46267;48486;57725;66601;84944;160822			-1;-1;-1				AMBP
F8VV56;F8W022;F8VWK8;P08962;F8VNT9	F8VV56;F8W022;F8VWK8;P08962;F8VNT9	3;3;3;3;2	3;3;3;3;2	3;3;3;3;2	Tetraspanin;CD63 antigen	CD63	tr|F8VV56|F8VV56_HUMAN CD63 antigen OS=Homo sapiens OX=9606 GN=CD63 PE=1 SV=1;tr|F8W022|F8W022_HUMAN Tetraspanin (Fragment) OS=Homo sapiens OX=9606 GN=CD63 PE=1 SV=1;tr|F8VWK8|F8VWK8_HUMAN Tetraspanin (Fragment) OS=Homo sapiens OX=9606 GN=CD63 PE=1 SV=1;sp	5	3	3	3	27.6	27.6	27.6	16.021	145	145;215;217;238;133	0	6.1641	370080	504590	431950	316280	347230	331340	423770	361450	482680	400130	849090000	10				1805	43444;47326;62850	True;True;True	47134;51289;51290;67930;67931	89072;96535;96536;96537;96538;127929;127930;127931	119587;129547;129548;129549;129550;129551;129552;171442;171443;171444	119587;129551;171443	1295;1296	19;30	-1;-1;-1;-1;-1				CD63
Q93077	Q93077	7	1	0	Histone H2A type 1-C	HIST1H2AC	sp|Q93077|H2A1C_HUMAN Histone H2A type 1-C OS=Homo sapiens OX=9606 GN=H2AC6 PE=1 SV=3	1	7	1	0	40.8	13.8	0	14.105	130	130	0	24.628	35924	24249	25880	51720	39227	27869	25211	38202	14153	20148	143500000	1				5985	2404;26386;26388;26390;31690;41556;64180	False;False;False;True;False;False;False	2569;28260;28262;28264;33966;45107;69363	5102;5103;5104;5105;5106;5107;5108;5109;5110;52650;52651;52652;52653;52654;52655;52656;52661;52662;52663;52664;52665;52666;52667;52668;52669;52670;52671;52672;52673;52676;64206;85486;85487;85488;85489;85490;130435	7073;7074;7075;7076;7077;7078;7079;7080;7081;7082;7083;7084;7085;7086;70819;70820;70821;70822;70823;70824;70825;70826;70827;70833;70834;70835;70836;70837;70838;70839;70840;70841;70842;70843;70844;70845;70846;70847;70848;70849;70850;70851;70852;70853;70854;70855;70856;70857;70860;86281;114873;114874;114875;114876;114877;114878;114879;114880;174729	7077;70823;70833;70860;86281;114876;174729			-1				HIST1H2AC
O14791;B1AH94;B1AH95;F8WCH3;B1AH96;O95236	O14791	4;1;1;1;1;1	4;1;1;1;1;1	4;1;1;1;1;1	Apolipoprotein L1	APOL1	sp|O14791|APOL1_HUMAN Apolipoprotein L1 OS=Homo sapiens OX=9606 GN=APOL1 PE=1 SV=5	6	4	4	4	7.8	7.8	7.8	43.974	398	398;118;141;142;159;402	0	4.3245	100630	199100	210000	115800	131250	82517	80800	104990	137250	125780	2078100000	6				2474	1405;26317;36712;60091	True;True;True;True	1499;28186;39314;64925	2868;2869;52407;74180;74181;122117	3960;3961;70395;99696;99697;163593	3961;70395;99697;163593			-1;-1;-1;-1;-1;-1				APOL1
C9J6P4;H7C5K1;G5E9U9	C9J6P4	21;6;1	1;1;0	1;1;0		ZC3HAV1	tr|C9J6P4|C9J6P4_HUMAN Zinc finger CCCH-type antiviral protein 1 OS=Homo sapiens OX=9606 GN=ZC3HAV1 PE=1 SV=1	3	21	1	1	22.9	1.9	1.9	114.08	1024	1024;264;420	0	6.4392	1808.2	3970.9	3492.6	2746.6	3347	2758.7	2854.4	2263.3	3129.6	3151.5	8866800	1				1246	5278;5279;5574;7271;14450;20591;20731;27855;28764;35983;38400;41515;41848;41849;43575;47257;54421;55269;59037;61621;67242	False;False;False;False;False;False;False;False;False;False;False;False;False;False;False;False;False;False;True;False;False	5686;5687;6006;7805;15470;22053;22206;29837;30794;38512;41085;45065;45413;45414;47273;51215;58821;59711;63772;66565;72623	10948;10949;11548;14607;28455;40576;40887;55958;55959;55960;58107;72807;77489;85411;85987;85988;89290;96430;110282;111810;119798;125250;136568;136569	14802;14803;15583;19585;38098;54684;55099;55100;75145;75146;75147;75148;78314;97898;104268;114775;115532;115533;119887;129424;147390;149415;160409;167819;182960;182961	14802;14803;15583;19585;38098;54684;55100;75146;78314;97898;104268;114775;115532;115533;119887;129424;147390;149415;160409;167819;182961			-1;-1;-1				ZC3HAV1
P53985;Q5T8R5;Q5T8R3;Q5T8R4	P53985	9;4;3;1	9;4;3;1	9;4;3;1	Monocarboxylate transporter 1	SLC16A1	sp|P53985|MOT1_HUMAN Monocarboxylate transporter 1 OS=Homo sapiens OX=9606 GN=SLC16A1 PE=1 SV=3	4	9	9	9	14	14	14	53.944	500	500;456;296;215	0	45.534	399090	756350	456990	542420	828420	755610	505390	420680	402720	581230	2405500000	24				4082	254;255;9853;11257;13299;17168;31046;36628;52502	True;True;True;True;True;True;True;True;True	262;263;10544;12088;14254;18400;33264;39227;56764	440;441;442;443;19405;19406;22260;26186;26187;26188;33696;62690;62691;62692;62693;74047;106819	579;580;581;582;583;584;25875;25876;25877;25878;29718;35040;35041;35042;35043;45197;84402;84403;84404;84405;84406;84407;99534;142957	579;582;25875;29718;35041;45197;84406;99534;142957			-1;-1;-1;-1				SLC16A1
I3L4J1;Q6PIW4	I3L4J1	21;1	1;0	0;0			tr|I3L4J1|I3L4J1_HUMAN Vesicle-fusing ATPase (Fragment) OS=Homo sapiens OX=9606 PE=1 SV=3	2	21	1	0	42.3	1.9	0	48.07	428	428;674	1	-2	7543.3	8215.7	7891.2	5377.1	6880.1	6932	7574.3	6703.9	6508.1	7319.6	40168000	1	+			2189	2781;5600;7586;11066;12693;16248;20015;22917;24525;30796;37372;39642;40937;41826;41827;49322;56304;65313;65371;65906;65907	False;False;False;False;False;False;False;False;False;False;False;False;True;False;False;False;False;False;False;False;False	2974;6033;8134;11883;13612;17441;21448;24539;26268;33006;40002;42398;44266;45391;45392;53399;60821;70570;70635;71207;71208	5894;5895;11588;11589;11590;15090;15091;15092;21886;25074;25075;32070;39431;39432;45128;48298;48299;62215;62216;62217;75512;79827;83712;85953;85954;85955;85956;100576;114157;132829;132963;133908;133909;133910	8079;8080;8081;8082;8083;15637;15638;15639;15640;20178;20179;20180;29201;33534;33535;33536;33537;42994;53098;53099;60752;64952;64953;83803;83804;83805;101603;107437;112570;115487;115488;115489;115490;115491;134734;134735;152767;177939;178111;179386;179387;179388	8081;15638;20179;29201;33536;42994;53099;60752;64952;83805;101603;107437;112570;115489;115490;134735;152767;177939;178111;179386;179388	1531	11	-1;-1
P20592	P20592	3	2	2	Interferon-induced GTP-binding protein Mx2	MX2	sp|P20592|MX2_HUMAN Interferon-induced GTP-binding protein Mx2 OS=Homo sapiens OX=9606 GN=MX2 PE=1 SV=1	1	3	2	2	4.3	2.7	2.7	82.088	715	715	0.0010563	2.5023	30096	59771	43490	34364	33842	35200	53490	37340	49417	38833	25889000	2				3484	6963;9292;63667	True;True;False	7485;9950;68813	14136;18376;129553	19009;24560;173591	19009;24560;173591			-1				MX2
Q9P2A4;I3L1X2;I3L3W4	Q9P2A4	6;2;1	6;2;1	6;2;1	ABI gene family member 3	ABI3	sp|Q9P2A4|ABI3_HUMAN ABI gene family member 3 OS=Homo sapiens OX=9606 GN=ABI3 PE=1 SV=2	3	6	6	6	21.9	21.9	21.9	39.035	366	366;191;160	0	6.865	82405	73958	96408	56480	81652	64003	70730	74938	89942	68659	241060000	7				6992	14682;29437;49781;59842;63977;64774	True;True;True;True;True;True	15723;31541;53886;64650;69147;70001	28942;59556;101555;121562;130099;131870	38718;80257;80258;135944;162797;174283;176712	38718;80258;135944;162797;174283;176712			-1;-1;-1				ABI3
O60462	O60462	3	3	3	Neuropilin-2	NRP2	sp|O60462|NRP2_HUMAN Neuropilin-2 OS=Homo sapiens OX=9606 GN=NRP2 PE=1 SV=3	1	3	3	3	4.5	4.5	4.5	104.83	931	931	0	22.663	14651	23583	17216	19287	18806	16742	21048	11307	18071	15770	53581000	4				2663	22373;27250;61205	True;True;True	23967;29198;66123	44094;54918;54919;124401	59408;73766;73767;166679	59408;73767;166679			-1				NRP2
P04839	P04839	8	8	8	Cytochrome b-245 heavy chain	CYBB	sp|P04839|CY24B_HUMAN Cytochrome b-245 heavy chain OS=Homo sapiens OX=9606 GN=CYBB PE=1 SV=2	1	8	8	8	13	13	13	65.335	570	570	0	15.31	221280	297410	256860	163400	253880	213910	283050	264140	291600	253360	1955400000	17				3089	12787;25237;25238;36028;40187;47666;64770;65759	True;True;True;True;True;True;True;True	13711;27020;27021;38558;43157;51652;69997;71044	25240;49809;49810;49811;72867;72868;81342;81343;97207;131863;131864;133602	33753;67080;67081;67082;67083;97967;97968;97969;97970;109452;109453;130443;130444;176704;176705;176706;178944	33753;67082;67083;97969;109452;130443;176705;178944	2266;2267	268;319	-1				CYBB
Q15758;M0QXM4;M0QX44	Q15758;M0QXM4	3;3;1	3;3;1	3;3;1	Neutral amino acid transporter B(0);Amino acid transporter	SLC1A5	sp|Q15758|AAAT_HUMAN Neutral amino acid transporter B(0) OS=Homo sapiens OX=9606 GN=SLC1A5 PE=1 SV=2;tr|M0QXM4|M0QXM4_HUMAN Amino acid transporter OS=Homo sapiens OX=9606 GN=SLC1A5 PE=1 SV=1	3	3	3	3	5.9	5.9	5.9	56.598	541	541;365;258	0	10.231	29496	37043	34676	21617	34349	27272	29257	32144	36302	77971	28281000	3				2351	7545;23888;54737	True;True;True	8089;25605;59150	15033;47172;110799	20110;63464;148063	20110;63464;148063			-1;-1;-1				SLC1A5
Q8WVI7	Q8WVI7	4	4	4	Protein phosphatase 1 regulatory subunit 1C	PPP1R1C	sp|Q8WVI7|PPR1C_HUMAN Protein phosphatase 1 regulatory subunit 1C OS=Homo sapiens OX=9606 GN=PPP1R1C PE=1 SV=1	1	4	4	4	44	44	44	12.346	109	109	0	8.866	113690	145310	144500	111970	127790	148530	110430	107810	143420	130780	319450000	5				5870	24315;24316;47794;49165	True;True;True;True	26050;26051;51785;53233	47903;47904;97397;100199	64434;64435;130690;130691;134255	64434;64435;130691;134255			-1				PPP1R1C
Q8NEU8;F8VXB0;F8VWV2;H0YH86;F8W124;F8VR68;F8VS86	Q8NEU8	24;7;5;5;3;2;2	24;7;5;5;3;2;2	23;7;5;4;3;2;2	DCC-interacting protein 13-beta	APPL2	sp|Q8NEU8|DP13B_HUMAN DCC-interacting protein 13-beta OS=Homo sapiens OX=9606 GN=APPL2 PE=1 SV=3	7	24	24	23	39.3	39.3	38.3	74.493	664	664;235;144;188;61;39;107	0	103.39	629690	842020	680940	540960	691130	765960	805100	676680	755170	813630	2551600000	38				5738	2603;2878;4178;9797;10134;14911;19656;27424;31417;32300;36120;36802;41048;43481;45501;46228;46522;46929;51970;56093;56818;64938;67537;67538	True;True;True;True;True;True;True;True;True;True;True;True;True;True;True;True;True;True;True;True;True;True;True;True	2779;3077;4522;10484;10847;15966;21053;29381;33671;34611;38656;39409;44443;47172;47173;49330;50098;50404;50869;56195;60595;60596;61366;70176;72937;72938	5523;6095;6096;6097;8760;19313;19956;19957;29456;38712;55216;63578;65431;73032;74336;84059;89122;89123;89124;89125;93048;94491;95041;95905;105822;113782;113783;113784;115137;132178;137084;137085	7641;8353;8354;8355;8356;8357;11910;25753;26638;26639;39454;52108;74159;74160;74161;85505;87828;98175;99887;113017;119658;119659;119660;119661;125007;126885;127642;128757;141629;152269;152270;152271;152272;154081;177105;183613;183614;183615	7641;8354;11910;25753;26638;39454;52108;74160;85505;87828;98175;99887;113017;119660;125007;126885;127642;128757;141629;152272;154081;177105;183613;183614	5125;5126;5127	144;422;517	-1;-1;-1;-1;-1;-1;-1				APPL2
A0A087WTA8;P08123	A0A087WTA8;P08123	12;12	12;12	12;12	Collagen alpha-2(I) chain	COL1A2	tr|A0A087WTA8|A0A087WTA8_HUMAN Collagen alpha-2(I) chain OS=Homo sapiens OX=9606 GN=COL1A2 PE=1 SV=1;sp|P08123|CO1A2_HUMAN Collagen alpha-2(I) chain OS=Homo sapiens OX=9606 GN=COL1A2 PE=1 SV=7	2	12	12	12	9.3	9.3	9.3	129.15	1364	1364;1366	0	174.24	454610	688460	726330	676140	850320	545160	427620	327050	565940	593420	9158200000	34				37	21184;21573;21898;22052;22666;22736;23891;24098;24133;25228;25419;26064	True;True;True;True;True;True;True;True;True;True;True;True	22690;23111;23453;23621;24274;24348;25608;25820;25856;27009;27010;27215;27916	41793;41794;42500;42501;42502;43163;43487;43488;43489;43490;44616;44617;44738;44739;47177;47178;47179;47180;47533;47595;49797;49798;50161;50162;51779;51780;51781;51782	56323;56324;57260;57261;57262;58179;58180;58611;58612;58613;58614;58615;60093;60094;60232;60233;60234;63470;63471;63472;63473;63474;63941;64034;67066;67067;67557;67558;67559;69628;69629;69630;69631;69632	56323;57260;58180;58614;60093;60233;63473;63941;64034;67067;67557;69630			-1;-1				COL1A2
Q5TEC6;A0A590UJL8	Q5TEC6;A0A590UJL8	4;2	1;1	1;1	Histone H3	HIST2H3PS2	tr|Q5TEC6|Q5TEC6_HUMAN Histone H3 OS=Homo sapiens OX=9606 GN=H3-2 PE=1 SV=1;tr|A0A590UJL8|A0A590UJL8_HUMAN H3.2 histone (putative) (Fragment) OS=Homo sapiens OX=9606 GN=H3-2 PE=1 SV=1	2	4	1	1	25	8.1	8.1	15.43	136	136;79	0.0016181	2.1867	153730	186060	173070	111740	174880	207800	200910	172880	111390	150750	4697200000	6				5089	14574;50315;54732;67178	True;False;False;False	15606;54454;59145;72557	28724;28725;28726;28727;102778;102779;102780;102781;102782;110790;110791;110792;110793;110794;136450;136451;136452;136453;136454;136455;136456;136457;136458;136459;136460;136461;136462;136463;136464;136465;136466;136467;136468;136469;136470;136471;136472;136473	38423;38424;38425;38426;38427;38428;137535;137536;137537;137538;137539;137540;137541;148050;148051;148052;148053;148054;148055;148056;148057;148058;182812;182813;182814;182815;182816;182817;182818;182819;182820;182821;182822;182823;182824;182825;182826;182827;182828;182829;182830;182831;182832;182833;182834;182835;182836;182837;182838;182839;182840;182841;182842;182843;182844;182845	38424;137539;148053;182828			-1;-1				HIST2H3PS2
REV__A0A0B4J203;REV__P16234	REV__A0A0B4J203;REV__P16234	2;2	2;2	2;2			tr|A0A0B4J203|A0A0B4J203_HUMAN Receptor protein-tyrosine kinase OS=Homo sapiens OX=9606 PE=3 SV=1;sp|P16234|PGFRA_HUMAN Platelet-derived growth factor receptor alpha OS=Homo sapiens OX=9606 GN=PDGFRA PE=1 SV=1	2	2	2	2	0	0	0	94.702	849	849;1089	0.0054462	1.4306	38852	31954	37274	25088	29175	27363	35743	28566	27200	35497	173730000	2		+		7450	39843;61456	True;True	42662;66388	80361;124901	108187;167376	108187;167376			-1;-1
Q92633;Q6GPG7;B1AP63	Q92633;Q6GPG7;B1AP63	3;3;2	3;3;2	3;3;2	Lysophosphatidic acid receptor 1	LPAR1	sp|Q92633|LPAR1_HUMAN Lysophosphatidic acid receptor 1 OS=Homo sapiens OX=9606 GN=LPAR1 PE=1 SV=3;tr|Q6GPG7|Q6GPG7_HUMAN Lysophosphatidic acid receptor 1 OS=Homo sapiens OX=9606 GN=LPAR1 PE=1 SV=1;tr|B1AP63|B1AP63_HUMAN Lysophosphatidic acid receptor 1 (Fr	3	3	3	3	9.1	9.1	9.1	41.109	364	364;346;182	0	15.864	78277	108360	73580	40628	78567	67722	41857	84956	83994	94073	653860000	6				5175	26248;38895;51484	True;True;True	28111;41614;55687	52269;52270;52271;78388;105027	70221;70222;70223;105452;140606;140607	70223;105452;140607			-1;-1;-1				LPAR1
P05114;A6NL93;A6NEL0;F2Z2W6;F2Z2Y5;H7BXJ5;A0A494C035	P05114;A6NL93;A6NEL0	8;6;6;3;3;3;3	8;6;6;3;3;3;3	8;6;6;3;3;3;3	Non-histone chromosomal protein HMG-14	HMGN1	sp|P05114|HMGN1_HUMAN Non-histone chromosomal protein HMG-14 OS=Homo sapiens OX=9606 GN=HMGN1 PE=1 SV=3;tr|A6NL93|A6NL93_HUMAN Non-histone chromosomal protein HMG-14 OS=Homo sapiens OX=9606 GN=HMGN1 PE=1 SV=1;tr|A6NEL0|A6NEL0_HUMAN Non-histone chromosomal	7	8	8	8	58	58	58	10.659	100	100;90;116;44;45;48;55	0	106.4	554320	650270	629540	479910	490020	433780	530590	412190	490810	920400	1987600000	17				3103	12984;38003;44707;44708;56253;56254;63937;63938	True;True;True;True;True;True;True;True	13920;40666;48473;48474;60767;60768;69106;69107	25581;25582;76758;76759;91334;91335;91336;114063;114064;114065;130034;130035;130036;130037	34223;34224;103272;103273;122543;122544;122545;152648;152649;152650;152651;174193;174194;174195;174196;174197;174198	34223;103273;122543;122544;152649;152651;174193;174197			-1;-1;-1;-1;-1;-1;-1				HMGN1
O75911;Q5SUY4	O75911	7;2	7;2	7;2	Short-chain dehydrogenase/reductase 3	DHRS3	sp|O75911|DHRS3_HUMAN Short-chain dehydrogenase/reductase 3 OS=Homo sapiens OX=9606 GN=DHRS3 PE=1 SV=2	2	7	7	7	30.8	30.8	30.8	33.548	302	302;147	0	24.76	153950	269000	200300	114230	201790	179500	133970	199060	188080	150230	272700000	11				2797	752;16298;17700;46861;52412;52954;61301	True;True;True;True;True;True;True	799;17491;18973;50778;56670;57244;57245;66225	1461;32129;34736;95703;106672;107682;107683;107684;124601	1986;43066;43067;46599;46600;128508;142743;144081;144082;144083;166972	1986;43067;46600;128508;142743;144083;166972	1952;1953	86;133	-1;-1				DHRS3
P56199;A0A494C0F7	P56199	9;2	9;2	9;2	Integrin alpha-1	ITGA1	sp|P56199|ITA1_HUMAN Integrin alpha-1 OS=Homo sapiens OX=9606 GN=ITGA1 PE=1 SV=2	2	9	9	9	7.8	7.8	7.8	130.85	1179	1179;277	0	27.763	122400	171970	160200	108320	133890	115630	140890	119150	117850	128050	304560000	10				4137	13101;19281;24953;47901;51705;61586;61934;64243;67308	True;True;True;True;True;True;True;True;True	14048;20654;26719;51896;55917;66529;66908;69429;72694	25822;37984;49121;49122;97594;105369;125143;126069;130544;136679	34552;51114;66064;66065;130958;141047;167676;168974;174872;183106	34552;51114;66064;130958;141047;167676;168974;174872;183106	3898	249	-1;-1				ITGA1
P28907;H0Y950	P28907	14;6	14;6	14;6	ADP-ribosyl cyclase/cyclic ADP-ribose hydrolase 1	CD38	sp|P28907|CD38_HUMAN ADP-ribosyl cyclase/cyclic ADP-ribose hydrolase 1 OS=Homo sapiens OX=9606 GN=CD38 PE=1 SV=2	2	14	14	14	44	44	44	34.328	300	300;151	0	53.787	527540	856420	535880	498680	506570	557880	432990	430500	514250	664600	2903400000	25				3640	8064;9645;13078;15324;28686;29399;34996;42365;42428;43100;47489;49010;63569;67364	True;True;True;True;True;True;True;True;True;True;True;True;True;True	8639;10322;14025;16400;30711;31501;37469;45959;46026;46760;51466;53064;68711;72752;72753	15971;19065;19066;19067;25775;30220;57968;59505;70849;70850;70851;86917;86918;87041;88394;96885;99883;99884;129380;129381;136782;136783	21359;25450;25451;25452;25453;34485;40455;78141;80197;95289;95290;95291;95292;116749;116750;116911;118637;130044;133879;133880;133881;173371;173372;183230;183231	21359;25450;34485;40455;78141;80197;95290;116750;116911;118637;130044;133880;173371;183231	3161	77	-1;-1				CD38
P02462;A0A3B3ISV3	P02462;A0A3B3ISV3	5;4	5;4	3;2	Collagen alpha-1(IV) chain;Arresten	COL4A1	sp|P02462|CO4A1_HUMAN Collagen alpha-1(IV) chain OS=Homo sapiens OX=9606 GN=COL4A1 PE=1 SV=4;tr|A0A3B3ISV3|A0A3B3ISV3_HUMAN Collagen alpha-1(IV) chain (Fragment) OS=Homo sapiens OX=9606 GN=COL4A1 PE=1 SV=1	2	5	5	3	4	4	2.5	160.61	1669	1669;386	0	21.012	150350	183430	183580	125760	147670	166960	190580	156210	169940	156470	588450000	11				3028	2651;21557;26805;29147;50652	True;True;True;True;True	2830;23092;28726;31196;54805	5618;5619;42466;53934;53935;53936;58819;58820;103380;103381	7753;7754;57213;72515;72516;72517;79263;79264;79265;138303;138304	7753;57213;72517;79263;138303			-1;-1				COL4A1
Q99536;K7ERT7;K7ESA3;K7ENX2;K7EM19;K7EJM4;K7ER81	Q99536	19;9;6;4;4;2;1	19;9;6;4;4;2;1	19;9;6;4;4;2;1	Synaptic vesicle membrane protein VAT-1 homolog	VAT1	sp|Q99536|VAT1_HUMAN Synaptic vesicle membrane protein VAT-1 homolog OS=Homo sapiens OX=9606 GN=VAT1 PE=1 SV=2	7	19	19	19	63.6	63.6	63.6	41.92	393	393;146;125;151;154;30;92	0	323.31	3510600	4134200	3455000	2592200	3204900	2968400	2638800	3125000	4262700	3466000	40924000000	154				6276	862;5960;7213;7214;16151;17783;25157;25611;35762;37064;42691;44196;45829;50942;56131;59313;62484;62485;64784	True;True;True;True;True;True;True;True;True;True;True;True;True;True;True;True;True;True;True	916;917;6417;7741;7742;17335;19058;26933;27429;27430;38285;39677;39678;46303;46304;47942;49676;55113;60637;64071;67499;67500;70011;70012	1723;1724;1725;1726;12238;14504;14505;31909;34898;34899;49637;49638;49639;49640;49641;49642;49643;49644;49645;49646;49647;50588;50589;50590;50591;50592;72357;74771;74772;74773;87583;87584;87585;87586;87587;90469;90470;90471;90472;90473;90474;90475;90476;90477;90478;93689;104034;104035;104036;113853;113854;113855;113856;113857;120459;120460;120461;120462;120463;120464;120465;120466;120467;120468;1…	2367;2368;2369;2370;2371;2372;16489;19453;19454;42786;46826;46827;46828;46829;66832;66833;66834;66835;66836;66837;66838;66839;66840;66841;66842;66843;66844;66845;66846;68100;68101;68102;68103;68104;68105;68106;68107;68108;97252;97253;100460;100461;100462;117592;117593;117594;117595;117596;117597;117598;117599;117600;117601;121419;121420;121421;121422;121423;121424;121425;121426;121427;121428;1214…	2372;16489;19453;19454;42786;46827;66845;68104;97253;100462;117592;121423;125852;139282;152379;161349;170360;170392;176732	5395;5396;5397;5398;5399;5400	94;112;261;279;287;299	-1;-1;-1;-1;-1;-1;-1				VAT1
P00748	P00748	3	3	3	Coagulation factor XII;Coagulation factor XIIa heavy chain;Beta-factor XIIa part 1;Coagulation factor XIIa light chain	F12	sp|P00748|FA12_HUMAN Coagulation factor XII OS=Homo sapiens OX=9606 GN=F12 PE=1 SV=3	1	3	3	3	4.2	4.2	4.2	67.791	615	615	0.0017518	2.0672	16852	29309	45295	22569	27456	20834	18089	20914	25997	30470	23500000	3				2990	16735;58018;64567	True;True;True	17955;62691;69782	32958;117536;131435	44209;157202;176133	44209;157202;176133			-1				F12
H7BXY6;A6NEP9;Q8NG11	H7BXY6;A6NEP9;Q8NG11	2;2;2	2;2;2	2;2;2	Tetraspanin;Tetraspanin-14	TSPAN14	tr|H7BXY6|H7BXY6_HUMAN Tetraspanin OS=Homo sapiens OX=9606 GN=TSPAN14 PE=1 SV=1;tr|A6NEP9|A6NEP9_HUMAN Tetraspanin (Fragment) OS=Homo sapiens OX=9606 GN=TSPAN14 PE=1 SV=2;sp|Q8NG11|TSN14_HUMAN Tetraspanin-14 OS=Homo sapiens OX=9606 GN=TSPAN14 PE=1 SV=1	3	2	2	2	8.9	8.9	8.9	23.918	213	213;223;270	0.00016798	4.2389	98306	139170	136080	88596	124420	113400	104570	105280	103600	110510	219820000	2				981	64680;65110	True;True	69902;70354	131653;132467	176421;177478	176421;177478			-1;-1;-1				TSPAN14
Q8NAT1	Q8NAT1	2	2	2	Protein O-linked-mannose beta-1,4-N-acetylglucosaminyltransferase 2	POMGNT2	sp|Q8NAT1|PMGT2_HUMAN Protein O-linked-mannose beta-1,4-N-acetylglucosaminyltransferase 2 OS=Homo sapiens OX=9606 GN=POMGNT2 PE=1 SV=1	1	2	2	2	3.4	3.4	3.4	66.615	580	580	0.00016858	4.2973	24841	25633	25683	48990	25495	29853	29413	35506	26313	30871	45214000	3				5694	4199;65515	True;True	4547;70789	8809;133183;133184	11969;178399;178400	11969;178399			-1				POMGNT2
P13726	P13726	5	5	5	Tissue factor	F3	sp|P13726|TF_HUMAN Tissue factor OS=Homo sapiens OX=9606 GN=F3 PE=1 SV=1	1	5	5	5	23.1	23.1	23.1	33.067	295	295	0	61.936	486250	427280	367790	357880	360330	441070	474520	361460	481950	429550	1051600000	12				3349	2574;6962;21966;54720;58062	True;True;True;True;True	2749;7484;23531;59132;59133;62739	5465;14135;43304;110763;110764;110765;110766;110767;117616	7551;7552;19008;58365;58366;148010;148011;148012;148013;148014;148015;157304	7552;19008;58365;148015;157304	2708	242	-1				F3
P02452	P02452	15	15	14	Collagen alpha-1(I) chain	COL1A1	sp|P02452|CO1A1_HUMAN Collagen alpha-1(I) chain OS=Homo sapiens OX=9606 GN=COL1A1 PE=1 SV=5	1	15	15	14	10.8	10.8	10.2	138.94	1464	1464	0	60.89	897090	1505600	1428500	1416600	1701800	992740	854430	552460	929430	1114600	15356000000	54				3026	8792;20865;21373;21503;21583;21723;22028;22050;22264;23890;24538;25325;42013;45852;54766	True;True;True;True;True;True;True;True;True;True;True;True;True;True;True	9413;22347;22892;23032;23121;23267;23596;23619;23852;25607;26282;27119;45585;49702;59179;59180	17335;41114;41115;41116;42127;42128;42368;42369;42517;42518;42519;42520;42802;43418;43419;43420;43484;43485;43906;47174;47175;47176;48324;50020;50021;86278;86279;93740;110847;110848;110849;110850;110851;110852	23168;55396;55397;55398;56754;56755;56756;57075;57076;57283;57284;57285;57286;57287;57288;57289;57290;57291;57292;57293;57294;57295;57296;57297;57676;57677;58518;58519;58520;58521;58522;58607;58608;58609;59165;63466;63467;63468;63469;64988;67363;67364;115908;115909;115910;125919;148133;148134;148135;148136;148137;148138;148139;148140	23168;55398;56754;57075;57286;57677;58522;58609;59165;63466;64988;67364;115909;125919;148139	2167	181	-1				COL1A1
P16452;F5H563;H3BPV8;H3BUR1	P16452;F5H563	11;9;5;3	11;9;5;3	11;9;5;3	Erythrocyte membrane protein band 4.2	EPB42	sp|P16452|EPB42_HUMAN Protein 4.2 OS=Homo sapiens OX=9606 GN=EPB42 PE=1 SV=3;tr|F5H563|F5H563_HUMAN Erythrocyte membrane protein band 4.2 OS=Homo sapiens OX=9606 GN=EPB42 PE=1 SV=1	4	11	11	11	16.4	16.4	16.4	77.008	691	691;613;191;147	0	45.71	369160	446630	463050	404810	701620	479020	423560	394440	489800	365690	1015500000	18				3409	2040;4518;12839;20093;21380;24813;60020;62547;62548;64778;66943	True;True;True;True;True;True;True;True;True;True;True	2184;4884;13766;21527;22901;26570;64844;67572;67573;70005;72311	4319;9411;25337;39569;39570;42146;42147;48811;121937;121938;121939;127270;127271;131874;135985	6038;12774;33887;33888;53276;53277;56779;56780;65626;163298;163299;163300;163301;170538;170539;170540;176716;182140	6038;12774;33887;53276;56780;65626;163298;170539;170540;176716;182140			-1;-1;-1;-1				EPB42
J3QQZ9;Q9NVS9;J3QQV6;A0A286YFL3	J3QQZ9;Q9NVS9;J3QQV6	10;10;7;3	10;10;7;3	10;10;7;3	Pyridoxine-5-phosphate oxidase	PNPO	tr|J3QQZ9|J3QQZ9_HUMAN Pyridoxal 5-phosphate synthase (Fragment) OS=Homo sapiens OX=9606 GN=PNPO PE=1 SV=2;sp|Q9NVS9|PNPO_HUMAN Pyridoxine-5-phosphate oxidase OS=Homo sapiens OX=9606 GN=PNPO PE=1 SV=1;tr|J3QQV6|J3QQV6_HUMAN Pyridoxal 5-phosphate synthas	4	10	10	10	30.3	30.3	30.3	27.312	238	238;261;165;151	0	92.251	634400	675090	628000	732230	814570	808910	584900	421360	721720	573740	6791000000	31				2265	19154;21777;23457;23458;31929;31930;32005;36933;41746;60813	True;True;True;True;True;True;True;True;True;True	20516;23323;25110;25111;25112;34214;34215;34297;39542;45308;65699	37758;37759;42890;46170;46171;46172;46173;46174;64722;64723;64724;64725;64853;64854;74563;85835;85836;85837;85838;85839;123575	50827;50828;50829;50830;50831;57783;62085;62086;62087;62088;62089;62090;62091;86964;86965;86966;86967;86968;86969;87128;87129;87130;100190;115344;115345;115346;115347;115348;115349;115350;165594	50831;57783;62087;62091;86964;86968;87128;100190;115345;165594	1568	223	-1;-1;-1;-1				PNPO
A2BFX2;A0A5S8K7D1	A2BFX2;A0A5S8K7D1	6;5	4;4	3;3		HLA-DRB1	tr|A2BFX2|A2BFX2_HUMAN HLA class II histocompatibility antigen DR beta chain OS=Homo sapiens OX=9606 GN=HLA-DRB1 PE=1 SV=1;tr|A0A5S8K7D1|A0A5S8K7D1_HUMAN HLA class II histocompatibility antigen, DRB1 beta chain (Fragment) OS=Homo sapiens OX=9606 GN=HLA-DRB	2	6	4	3	22.6	11.7	8.3	30.24	266	266;250	0	7.8405	223120	304170	263770	81306	75921	79051	76974	191760	128770	86197	306570000	6				951	6395;18881;22756;50336;64988;66161	False;True;False;True;True;True	6877;20221;24368;54476;70228;71481	13094;13095;37187;44772;102815;132281;134413;134414	17653;17654;17655;50067;60268;137576;177242;177243;180085;180086	17654;50067;60268;137576;177242;180086			-1;-1				HLA-DRB1
F5H3S6	F5H3S6	10	1	1		TOM1L2	tr|F5H3S6|F5H3S6_HUMAN TOM1-like protein 2 OS=Homo sapiens OX=9606 GN=TOM1L2 PE=1 SV=1	1	10	1	1	22.4	3.4	3.4	42.727	388	388	0	6.048	23614	35022	28019	28269	23286	36752	33828	23628	38034	37312	41201000	1				1750	8827;21395;23824;30507;37958;47735;51414;56008;59553;59554	False;False;False;False;False;True;False;False;False;False	9450;22917;25537;32693;40618;51724;55609;60502;64330;64331	17445;42175;47061;61656;76646;76647;97308;104906;113627;120921;120922	23325;56814;63331;83070;83071;83072;103113;103114;130582;140447;152078;161970;161971	23325;56814;63331;83071;103114;130582;140447;152078;161970;161971			-1				TOM1L2
Q8N2H3	Q8N2H3	5	5	5	Pyridine nucleotide-disulfide oxidoreductase domain-containing protein 2	PYROXD2	sp|Q8N2H3|PYRD2_HUMAN Pyridine nucleotide-disulfide oxidoreductase domain-containing protein 2 OS=Homo sapiens OX=9606 GN=PYROXD2 PE=1 SV=2	1	5	5	5	9	9	9	63.067	581	581	0	12.656	66867	58459	38847	24554	21913	46675	37628	45271	23641	39227	80943000	5				5615	6490;7183;35023;37103;53110	True;True;True;True;True	6980;7710;37497;39720;57405	13275;14460;70899;74847;107910	17892;19399;95356;100568;144381	17892;19399;95356;100568;144381			-1				PYROXD2
B1AH87;P30536	B1AH87;P30536	3;3	3;3	3;3	Translocator protein	TSPO	tr|B1AH87|B1AH87_HUMAN Peripheral-type benzodiazepine receptor (Fragment) OS=Homo sapiens OX=9606 GN=TSPO PE=1 SV=1;sp|P30536|TSPO_HUMAN Translocator protein OS=Homo sapiens OX=9606 GN=TSPO PE=1 SV=3	2	3	3	3	21.5	21.5	21.5	11.896	107	107;169	0.00016477	3.8388	69751	90910	78846	74298	83170	74574	79306	58197	81350	68515	860360000	4				1052	15378;20647;65562	True;True;True	16456;22115;70839	30313;40707;40708;133261	40576;54858;54859;178486	40576;54858;178486			-1;-1				TSPO
P06737;E9PK47	P06737;E9PK47	42;37	32;27	32;27	Glycogen phosphorylase, liver form;Alpha-1,4 glucan phosphorylase	PYGL	sp|P06737|PYGL_HUMAN Glycogen phosphorylase, liver form OS=Homo sapiens OX=9606 GN=PYGL PE=1 SV=4;tr|E9PK47|E9PK47_HUMAN Alpha-1,4 glucan phosphorylase OS=Homo sapiens OX=9606 GN=PYGL PE=1 SV=1	2	42	32	32	43.3	32.9	32.9	97.147	847	847;819	0	103.91	2306700	3140400	2108400	1522600	2587000	2114200	1958400	2396100	2283500	2197600	8831200000	76				3141	545;3126;3127;4451;6501;6522;8688;10112;12040;18346;18519;20396;23031;23032;26292;26318;27461;27462;28412;29336;29791;30034;30461;40973;42199;42494;44452;45560;54169;56545;57982;58492;59388;60827;61072;61809;62774;62775;63923;65403;66061;66266	False;True;True;True;True;True;True;True;False;True;True;True;True;True;True;False;True;True;True;True;True;True;True;True;True;False;True;False;True;True;False;True;True;True;True;False;False;False;True;True;True;False	577;578;3344;3345;4814;6991;7013;7014;9302;10822;12919;19659;19837;21849;24665;24666;28161;28187;29421;29422;30427;31433;31434;31916;32183;32647;44319;44320;45782;46093;48203;49393;58556;58557;61079;62655;63192;64148;65714;65979;66768;67812;67813;69091;69092;70668;71374;71591	1010;1011;1012;1013;1014;1015;1016;1017;1018;1019;1020;1021;1022;1023;6569;6570;6571;9301;9302;13287;13325;13326;13327;13328;17113;17114;19889;23777;23778;23779;23780;23781;23782;23783;23784;36061;36353;40161;45354;45355;45356;45357;52356;52357;52408;55291;55292;55293;55294;55295;55296;57401;57402;59366;59367;59368;59369;60233;60234;60717;61578;83806;83807;86624;87158;87159;87160;87161;87162;8716…	1335;1336;1337;1338;1339;1340;1341;1342;1343;1344;1345;1346;1347;1348;1349;1350;1351;8973;8974;8975;8976;8977;12647;12648;17907;17908;17961;17962;17963;17964;22846;22847;22848;26501;31783;31784;31785;31786;31787;31788;31789;31790;31791;31792;31793;31794;31795;31796;48477;48858;54075;61038;61039;61040;61041;61042;70327;70328;70396;74255;74256;74257;74258;74259;74260;74261;74262;74263;74264;77388;7…	1348;8973;8977;12647;17908;17963;22848;26501;31790;48477;48858;54075;61038;61041;70328;70396;74257;74264;77388;80009;81221;81848;82967;112681;116346;117049;121963;125158;146838;153403;157139;158902;161545;165617;166298;168426;171153;171154;174165;178175;179830;180308	2348;2349;2350;2351	429;563;616;793	-1;-1				PYGL
E9PCK9	E9PCK9	6	1	1		MLIP	tr|E9PCK9|E9PCK9_HUMAN Muscular LMNA-interacting protein (Fragment) OS=Homo sapiens OX=9606 GN=MLIP PE=1 SV=1	1	6	1	1	13	2.5	2.5	59.111	561	561	0.0009058	2.5098	7212.7	13732	14115	12871	16566	10672	11630	7437.7	11468	13251	9681500	1				1578	1910;1911;52603;54875;58421;60954	False;False;False;True;False;False	2047;2048;56874;59300;63117;65850	4103;4104;4105;107019;107020;107021;111049;118486;123874;123875;123876	5752;5753;5754;5755;5756;143204;143205;143206;148403;158700;165990;165991;165992	5752;5755;143204;148403;158700;165992			-1				MLIP
Q92913;B1AJW0	Q92913;B1AJW0	2;1	2;1	2;1	Fibroblast growth factor 13;Fibroblast growth factor	FGF13	sp|Q92913|FGF13_HUMAN Fibroblast growth factor 13 OS=Homo sapiens OX=9606 GN=FGF13 PE=1 SV=1;tr|B1AJW0|B1AJW0_HUMAN Fibroblast growth factor (Fragment) OS=Homo sapiens OX=9606 GN=FGF13 PE=1 SV=8	2	2	2	2	6.5	6.5	6.5	27.563	245	245;206	0.0001584	3.2642	36574	46728	35531	40874	46557	41904	42786	28814	42921	31246	55409000	2				5973	25499;52089	True;True	27306;56326	50375;106041	67831;141901	67831;141901			-1;-1				FGF13
Q6BCY4;E9PIV9;E9PMI2;E9PQW2;E9PRM4	Q6BCY4;E9PIV9;E9PMI2;E9PQW2;E9PRM4	14;9;9;8;7	14;9;9;8;7	14;9;9;8;7	NADH-cytochrome b5 reductase 2	CYB5R2	sp|Q6BCY4|NB5R2_HUMAN NADH-cytochrome b5 reductase 2 OS=Homo sapiens OX=9606 GN=CYB5R2 PE=1 SV=1;tr|E9PIV9|E9PIV9_HUMAN NADH-cytochrome b5 reductase 2 (Fragment) OS=Homo sapiens OX=9606 GN=CYB5R2 PE=1 SV=1;tr|E9PMI2|E9PMI2_HUMAN NADH-cytochrome b5 reductas	5	14	14	14	49.3	49.3	49.3	31.458	276	276;146;171;189;116	0	90.157	830550	1389600	1154000	1014800	1097100	991760	844690	726100	1008800	815250	5309000000	38				5163	15262;16382;27556;28163;31355;34567;40974;41085;43879;48880;50036;54817;66993;67298	True;True;True;True;True;True;True;True;True;True;True;True;True;True	16337;17582;29519;30161;33599;37019;44321;44498;44499;47601;52928;54150;59235;72363;72683;72684	30123;30124;30125;32296;55442;56600;56601;63419;70017;70018;70019;70020;70021;83808;84168;84169;84170;84171;89865;89866;99591;102051;102052;110935;136114;136115;136659;136660;136661;136662;136663	40321;40322;40323;40324;40325;43303;74464;76063;76064;76065;85301;94171;94172;94173;94174;94175;94176;94177;112683;113156;113157;113158;113159;120626;120627;133501;136556;136557;148248;182373;182374;183080;183081;183082;183083;183084;183085;183086	40323;43303;74464;76064;85301;94177;112683;113159;120627;133501;136556;148248;182373;183086	4904;4905	102;232	-1;-1;-1;-1;-1				CYB5R2
Q9BQ61;K7ELS0;K7ERU7;K7EN60	Q9BQ61;K7ELS0;K7ERU7;K7EN60	3;2;2;2	3;2;2;2	3;2;2;2	Uncharacterized protein C19orf43	C19orf43	sp|Q9BQ61|TRIR_HUMAN Telomerase RNA component interacting RNase OS=Homo sapiens OX=9606 GN=TRIR PE=1 SV=1;tr|K7ELS0|K7ELS0_HUMAN Telomerase RNA component-interacting RNase OS=Homo sapiens OX=9606 GN=TRIR PE=1 SV=1;tr|K7ERU7|K7ERU7_HUMAN Telomerase RNA comp	4	3	3	3	19.9	19.9	19.9	18.419	176	176;132;133;150	0	11.902	56566	76992	68496	48359	70275	60784	66095	65229	77984	123410	122120000	3				6333	45284;47564;56180	True;True;True	49096;51547;60689	92615;97046;113943	124451;130252;152493	124451;130252;152493			-1;-1;-1;-1				C19orf43
F5H5D3;Q9BQE3;A0A1W2PQM2;F8VQQ4;F8VVB9;F8VRZ4;F8VS66;F8VWV9;F8VX09;F8VRK0;F8W0F6;F8VXZ7	F5H5D3;Q9BQE3;A0A1W2PQM2	33;33;19;14;14;9;9;8;7;3;2;1	2;2;1;0;0;0;0;0;0;0;0;0	2;2;1;0;0;0;0;0;0;0;0;0	Tubulin alpha-1C chain	TUBA1C	tr|F5H5D3|F5H5D3_HUMAN Tubulin alpha chain OS=Homo sapiens OX=9606 GN=TUBA1C PE=1 SV=1;sp|Q9BQE3|TBA1C_HUMAN Tubulin alpha-1C chain OS=Homo sapiens OX=9606 GN=TUBA1C PE=1 SV=1;tr|A0A1W2PQM2|A0A1W2PQM2_HUMAN Tubulin alpha-1C chain OS=Homo sapiens OX=9606 GN	12	33	2	2	54.3	8.3	8.3	57.73	519	519;449;325;219;246;112;130;81;75;49;231;26	0	22.027	15840	16428	19037	9790.6	14889	14166	12000	16396	17649	31590	99428000	4				1760	2127;2128;6082;6600;11668;11669;11895;12809;13007;14699;18823;18846;18847;21682;22783;28358;38414;38415;42535;44568;46441;46442;48484;48485;49656;50168;56930;57145;57146;57233;61417;61418;66804	False;False;False;True;False;False;True;False;False;False;False;False;False;False;False;False;False;False;False;False;False;False;False;False;False;False;False;False;False;False;False;False;False	2273;2274;2275;2276;2277;6546;7099;12521;12522;12762;13734;13944;13945;15742;20157;20182;20183;20184;20185;23223;24396;30367;41099;41100;46136;48327;50319;50320;52510;52511;52512;52513;52514;53750;54294;61489;61726;61727;61827;66347;66348;72150;72151	4470;4471;4472;4473;4474;4475;4476;4477;4478;4479;4480;4481;4482;4483;4484;4485;4486;4487;4488;4489;4490;4491;4492;4493;4494;4495;4496;4497;4498;4499;4500;4501;4502;4503;4504;4505;4506;4507;4508;4509;4510;4511;4512;4513;4514;4515;4516;4517;4518;4519;4520;4521;4522;4523;4524;4525;4526;4527;4528;4529;4530;12482;12483;12484;12485;12486;12487;12488;12489;12490;12491;13522;13523;23068;23069;23070;2307…	6235;6236;6237;6238;6239;6240;6241;6242;6243;6244;6245;6246;6247;6248;6249;6250;6251;6252;6253;6254;6255;6256;6257;6258;6259;6260;6261;6262;6263;6264;6265;6266;6267;6268;6269;6270;6271;6272;6273;6274;6275;6276;6277;6278;6279;6280;6281;6282;6283;6284;6285;6286;6287;6288;6289;6290;6291;6292;6293;6294;6295;6296;6297;6298;6299;6300;6301;6302;6303;6304;6305;6306;6307;6308;6309;6310;6311;6312;6313;1684…	6265;6290;16845;18246;30840;30870;31366;33806;34296;38761;49894;49943;49973;57543;60347;77224;104302;104318;117171;122222;127390;127472;132498;132519;135583;137031;154348;155017;155018;155241;167268;167282;181808	783;785;1251;1252;1253	372;383;468;483;495	-1;-1;-1;-1;-1;-1;-1;-1;-1;-1;-1;-1				TUBA1C
Q6P3X3;A0A3B3IS02	Q6P3X3	3;1	3;1	3;1	Tetratricopeptide repeat protein 27	TTC27	sp|Q6P3X3|TTC27_HUMAN Tetratricopeptide repeat protein 27 OS=Homo sapiens OX=9606 GN=TTC27 PE=1 SV=1	2	3	3	3	4	4	4	96.631	843	843;350	0	11.525	20475	27453	22044	15609	20533	20202	18108	20710	23734	20795	31296000	3				5228	3481;37568;46449	True;True;True	3720;40211;50327	7257;75869;94924	9935;102062;127501	9935;102062;127501			-1;-1				TTC27
Q03135;E9PCT5;C9JKI3	Q03135;E9PCT5;C9JKI3	7;5;4	7;5;4	6;4;3	Caveolin-1;Caveolin	CAV1	sp|Q03135|CAV1_HUMAN Caveolin-1 OS=Homo sapiens OX=9606 GN=CAV1 PE=1 SV=4;tr|E9PCT5|E9PCT5_HUMAN Caveolin OS=Homo sapiens OX=9606 GN=CAV1 PE=1 SV=1;tr|C9JKI3|C9JKI3_HUMAN Caveolin (Fragment) OS=Homo sapiens OX=9606 GN=CAV1 PE=1 SV=1	3	7	7	6	39.3	39.3	33.7	20.471	178	178;167;138	0	14.886	295240	680840	584740	354580	442490	327840	307790	364310	378380	425000	5206900000	21				4418	3994;5202;14598;16587;26351;48261;67485	True;True;True;True;True;True;True	4263;4264;5605;15630;17795;28223;52278;72883	8240;8241;8242;8243;10796;28764;28765;32673;32674;52479;52480;52481;52482;98356;98357;136996;136997	11224;11225;11226;11227;11228;11229;14617;38474;38475;38476;43846;43847;70487;70488;70489;70490;70491;131988;131989;183505;183506	11229;14617;38474;43846;70489;131988;183506	4238	32	-1;-1;-1				CAV1
U3KQG5;P41217;F8W7G1;U3KQQ2;F8WC99	U3KQG5;P41217;F8W7G1	3;3;2;1;1	3;3;2;1;1	3;3;2;1;1	OX-2 membrane glycoprotein	CD200	tr|U3KQG5|U3KQG5_HUMAN OX-2 membrane glycoprotein (Fragment) OS=Homo sapiens OX=9606 GN=CD200 PE=1 SV=1;sp|P41217|OX2G_HUMAN OX-2 membrane glycoprotein OS=Homo sapiens OX=9606 GN=CD200 PE=1 SV=4;tr|F8W7G1|F8W7G1_HUMAN OX-2 membrane glycoprotein OS=Homo sap	5	3	3	3	19.8	19.8	19.8	22.522	202	202;278;195;62;150	0	45.176	106010	118960	102200	97524	126090	141830	129530	104360	122120	104290	180150000	4				3811	7431;17997;44232	True;True;True	7970;19290;47978	14857;35446;35447;90542	19896;47673;47674;121512	19896;47673;121512			-1;-1;-1;-1;-1				CD200
Q6UWY5;E9PN44	Q6UWY5	12;2	12;2	12;2	Olfactomedin-like protein 1	OLFML1	sp|Q6UWY5|OLFL1_HUMAN Olfactomedin-like protein 1 OS=Homo sapiens OX=9606 GN=OLFML1 PE=1 SV=2	2	12	12	12	28.1	28.1	28.1	45.95	402	402;56	0	33.117	390310	881700	576320	342300	448890	382300	338000	464040	362770	448790	1751100000	20				5272	2044;6613;7370;7974;12144;14603;20253;27866;40551;50767;62284;64969	True;True;True;True;True;True;True;True;True;True;True;True	2188;7112;7908;8544;13029;15635;21700;29848;43682;54927;67288;70208	4326;4327;13544;13545;13546;14751;14752;15819;23998;28771;39892;55977;82383;82384;103591;126755;132250	6045;6046;18272;18273;18274;19765;19766;21151;32126;38482;38483;53703;75166;75167;110822;110823;138594;169862;177202;177203	6046;18273;19765;21151;32126;38483;53703;75166;110823;138594;169862;177202			-1;-1				OLFML1
P11047;R4GNC7;REV__Q9NQS7	P11047	57;2;1	57;2;1	57;2;1	Laminin subunit gamma-1	LAMC1	sp|P11047|LAMC1_HUMAN Laminin subunit gamma-1 OS=Homo sapiens OX=9606 GN=LAMC1 PE=1 SV=3	3	57	57	57	39.2	39.2	39.2	177.6	1609	1609;37;918	0	323.31	2098900	3972300	3414300	2775200	2835300	3264000	2783100	2143900	2244500	2583700	15920000000	119				3285	883;2716;3178;5525;6833;6894;7116;7192;7350;7383;8146;8828;8829;9007;10429;10442;11891;12250;12556;12577;14073;18077;18241;26513;33235;35074;35302;35586;36644;36840;37991;39994;42555;43697;44330;44385;45078;45189;45192;46661;46662;48575;50560;53833;55318;55500;55514;55515;56432;56854;57347;57692;58575;58576;63733;63734;64001	True;True;True;True;True;True;True;True;True;True;True;True;True;True;True;True;True;True;True;True;True;True;True;True;True;True;True;True;True;True;True;True;True;True;True;True;True;True;True;True;True;True;True;True;True;True;True;True;True;True;True;True;True;True;True;True;True	940;941;2901;3398;5951;7346;7410;7643;7719;7886;7921;8724;9451;9452;9645;11212;11226;12758;13143;13144;13469;13470;13492;15066;19372;19373;19551;28412;35611;37551;37795;38099;39244;39448;40652;42890;42891;46156;47403;48079;48134;48870;48991;48994;50550;50551;52610;54708;58198;59766;59963;59977;59978;60958;61406;61953;62321;63282;63283;68884;68885;69171	1762;1763;1764;5760;5761;5762;5763;6717;11370;11371;13928;14037;14360;14470;14727;14775;14776;16108;17446;17447;17448;17449;17450;17783;20721;20743;23471;23472;24238;24239;24821;24822;24823;24824;24825;24854;24855;24856;27621;35555;35556;35879;53029;67362;71010;71488;71489;72047;72048;72049;74071;74072;74385;74386;76725;80870;80871;80872;87304;89527;89528;90696;90797;92126;92127;92353;92354;92358…	2411;2412;2413;7913;7914;7915;7916;9216;15333;15334;18754;18878;19278;19279;19409;19733;19794;19795;21540;23326;23327;23328;23329;23330;23765;23766;27684;27713;31357;31358;32432;32433;32434;33193;33194;33195;33196;33197;33198;33199;33233;33234;33235;33236;33237;36962;47817;47818;48234;71283;90337;95492;96114;96115;96116;96886;96887;96888;99562;99563;99946;99947;99948;103234;108890;108891;108892;1…	2413;7916;9216;15333;18754;18878;19278;19409;19733;19794;21540;23326;23330;23765;27684;27713;31358;32433;33197;33237;36962;47818;48234;71283;90337;95492;96115;96887;99563;99948;103234;108892;117242;120191;121707;121838;123651;123948;123954;127897;127898;132762;138111;146072;149566;150660;150683;150685;153060;154173;155531;156427;159267;159268;173727;173728;174331	2578;2579;2580;2581;2582;2583;2584	892;1083;1100;1291;1314;1573;1583	-1;-1;-1				LAMC1
H0Y8C4	H0Y8C4	15	1	1		PPP2R5D	tr|H0Y8C4|H0Y8C4_HUMAN Serine/threonine-protein phosphatase 2A 56 kDa regulatory subunit delta isoform (Fragment) OS=Homo sapiens OX=9606 GN=PPP2R5D PE=1 SV=1	1	15	1	1	30.6	3.4	3.4	59.335	504	504	1	-2	185390	279210	272500	117560	162660	103950	168970	208180	192240	224220	929930000	2	+			1964	11126;16872;19630;32393;34348;34459;46140;48451;48490;51442;57158;59324;62112;62474;62805	False;False;False;False;False;False;False;False;False;False;False;False;True;False;False	11952;18095;21027;34712;36795;36907;36908;50005;52476;52520;55640;61740;64082;64083;67102;67487;67855	22013;22014;22015;33183;38674;65623;69667;69831;69832;69833;94319;94320;94321;98691;98692;98784;104950;115870;115871;120487;120488;120489;126424;126425;127117;127118;127787;127788;127789	29371;29372;29373;29374;44490;52060;88055;93710;93711;93929;93930;93931;126661;126662;126663;132419;132420;132535;132536;140501;140502;140503;155038;155039;155040;161390;161391;161392;169436;169437;170331;170332;170333;171254;171255;171256;171257	29371;44490;52060;88055;93711;93931;126663;132419;132536;140503;155040;161391;169436;170332;171257	1175	460	-1				PPP2R5D
P08514;K7EP83;A0A3B3IU79	P08514	4;1;1	4;1;1	4;1;1	Integrin alpha-IIb;Integrin alpha-IIb heavy chain;Integrin alpha-IIb light chain, form 1;Integrin alpha-IIb light chain, form 2	ITGA2B	sp|P08514|ITA2B_HUMAN Integrin alpha-IIb OS=Homo sapiens OX=9606 GN=ITGA2B PE=1 SV=3	3	4	4	4	4.9	4.9	4.9	113.38	1039	1039;104;811	0	8.7755	45492	56376	97890	46276	50939	50022	47811	48400	48041	47397	71504000	4				3196	1534;43436;43868;59997	True;True;True;True	1632;47126;47589;64818	3147;89029;89840;121887	4345;119515;120600;163235	4345;119515;120600;163235			-1;-1;-1				ITGA2B
P36955;CON__Q95121;I3L4N7;I3L425;I3L4F9;I3L107;I3L3Z3;I3L1U4;I3L4Z0;I3L2R7	P36955	7;3;2;1;1;1;1;1;1;1	7;3;2;1;1;1;1;1;1;1	7;3;2;1;1;1;1;1;1;1	Pigment epithelium-derived factor	SERPINF1	sp|P36955|PEDF_HUMAN Pigment epithelium-derived factor OS=Homo sapiens OX=9606 GN=SERPINF1 PE=1 SV=4	10	7	7	7	16.5	16.5	16.5	46.312	418	418;416;138;87;90;99;111;114;128;132	0	23.606	183950	294700	389280	177730	280600	236740	213160	257650	224090	222710	894090000	8				3772	11272;32581;38794;54335;59475;62682;66245	True;True;True;True;True;True;True	12104;34911;41506;58729;64245;67715;71568	22307;65990;78208;110138;120751;127530;127531;134562	29784;88513;105223;147213;161744;170914;170915;180263	29784;88513;105223;147213;161744;170915;180263			-1;-1;-1;-1;-1;-1;-1;-1;-1;-1				SERPINF1
Q9H8Y5;B8ZZS4;C9JS61	Q9H8Y5;B8ZZS4	3;2;1	3;2;1	3;2;1	Ankyrin repeat and zinc finger domain-containing protein 1	ANKZF1	sp|Q9H8Y5|ANKZ1_HUMAN Ankyrin repeat and zinc finger domain-containing protein 1 OS=Homo sapiens OX=9606 GN=ANKZF1 PE=1 SV=1;tr|B8ZZS4|B8ZZS4_HUMAN Ankyrin repeat and zinc finger domain-containing protein 1 OS=Homo sapiens OX=9606 GN=ANKZF1 PE=1 SV=1	3	3	3	3	3	3	3	80.926	726	726;516;115	0.005185	1.4647	89443	152910	105380	64594	80153	79751	63972	98570	111240	97457	52604000	4				6663	2234;16840;52786	True;True;True	2392;18062;57068	4762;33125;107363	6615;44425;143655;143656	6615;44425;143655			-1;-1;-1				ANKZF1
O95758	O95758	4	2	2	Polypyrimidine tract-binding protein 3	PTBP3	sp|O95758|PTBP3_HUMAN Polypyrimidine tract-binding protein 3 OS=Homo sapiens OX=9606 GN=PTBP3 PE=1 SV=2	1	4	2	2	8	4.9	4.9	59.689	552	552	0	5.3904	33430	44886	36795	26431	30999	37397	38195	36058	39640	48387	33994000	2				2936	14243;38821;39781;42592	False;False;True;True	15252;41535;42571;46194	28018;78261;80156;87355	37538;37539;37540;105289;107890;117302	37540;105289;107890;117302			-1				PTBP3
P04040	P04040	27	27	27	Catalase	CAT	sp|P04040|CATA_HUMAN Catalase OS=Homo sapiens OX=9606 GN=CAT PE=1 SV=3	1	27	27	27	49.7	49.7	49.7	59.755	527	527	0	259.76	1355700	1768900	1715300	1357100	2291200	1822300	1487300	1538800	1667400	1295200	19859000000	78				3068	1210;1252;2143;2144;7886;9801;10463;11984;19967;20429;20430;20981;22948;24010;32439;33205;34339;34905;36863;38302;39202;41985;42799;49004;49354;61121;66839	True;True;True;True;True;True;True;True;True;True;True;True;True;True;True;True;True;True;True;True;True;True;True;True;True;True;True	1295;1342;2293;2294;8455;10488;11247;12858;21399;21882;21883;22475;24574;25730;25731;34761;35577;36786;37376;39471;40982;41937;45556;46420;53058;53432;66029;72201	2482;2563;2564;4552;4553;4554;4555;4556;15677;19320;19321;19322;19323;20771;23668;23669;23670;39308;39309;39310;39311;40203;40204;40205;40206;40207;41401;41402;41403;41404;45181;47401;47402;47403;65699;67311;69655;70690;70691;74419;74420;77334;77335;78942;78943;86239;86240;86241;86242;86243;87792;99874;100652;124216;124217;124218;135808	3411;3524;3525;3526;3527;3528;6338;6339;6340;6341;6342;6343;6344;6345;6346;20958;25765;25766;25767;25768;25769;27755;27756;31620;31621;31622;31623;31624;52900;52901;52902;52903;52904;54120;54121;54122;54123;54124;54125;54126;55791;55792;55793;55794;55795;60820;63768;63769;63770;88144;90280;93695;93696;95062;95063;95064;99988;99989;104065;104066;106164;106165;106166;115857;115858;115859;115860;115…	3411;3525;6342;6344;20958;25765;27756;31622;52901;54120;54125;55793;60820;63770;88144;90280;93696;95062;99989;104065;106166;115862;117873;133867;134825;166450;181908	2225;2226	12;61	-1				CAT
O15270;H0YJV2;Q9NUV7	O15270;H0YJV2	8;7;1	8;7;1	8;7;1	Serine palmitoyltransferase 2	SPTLC2	sp|O15270|SPTC2_HUMAN Serine palmitoyltransferase 2 OS=Homo sapiens OX=9606 GN=SPTLC2 PE=1 SV=1;tr|H0YJV2|H0YJV2_HUMAN Serine palmitoyltransferase 2 (Fragment) OS=Homo sapiens OX=9606 GN=SPTLC2 PE=1 SV=1	3	8	8	8	15.3	15.3	15.3	62.924	562	562;407;552	0	36.584	104920	112020	138010	92362	119340	124590	130480	110820	120000	106670	1873500000	10				2537	6632;7805;12803;31367;36973;38127;43689;51709	True;True;True;True;True;True;True;True	7131;8368;13728;33611;39582;40792;47395;55921	13569;15531;25261;25262;63434;74626;76979;76980;89511;105376	18303;20764;33780;33781;85318;100274;103564;103565;120170;141056	18303;20764;33781;85318;100274;103565;120170;141056			-1;-1;-1				SPTLC2
C9J5H8	C9J5H8	6	2	2		NCDN	tr|C9J5H8|C9J5H8_HUMAN Neurochondrin (Fragment) OS=Homo sapiens OX=9606 GN=NCDN PE=1 SV=1	1	6	2	2	28.3	8.2	8.2	26.367	244	244	0	6.4357	3680.6	3276.3	4828.6	4111.2	4105.4	5155.3	4342.2	2834.8	3633.3	3457.4	143080000	3				1237	5127;5128;12240;12522;21549;53238	True;True;False;False;False;False	5524;5525;13133;13433;23084;57552;57553	10632;10633;24218;24219;24760;24761;24762;42453;42454;108151;108152;108153;108154	14404;14405;14406;32409;32410;33118;33119;33120;57190;57191;57192;57193;144681;144682;144683;144684	14405;14406;32410;33118;57192;144684	919	134	-1				NCDN
J3KT01	J3KT01	10	1	1		MBP	tr|J3KT01|J3KT01_HUMAN Myelin basic protein (Fragment) OS=Homo sapiens OX=9606 GN=MBP PE=1 SV=1	1	10	1	1	35.6	7.8	7.8	19.37	180	180	0.00016255	3.6378	6787.1	8180.4	7245.2	7245.9	8209.1	9429.5	9693.3	6668.8	8588.7	6799.6	10369000	1				2245	463;20456;42421;52206;52207;58232;58233;58360;58361;64877	False;False;False;False;False;False;False;False;False;True	479;21909;46018;56454;56455;62913;62914;63052;63053;70110	850;851;40342;87028;87029;87030;87031;87032;106273;106274;106275;106276;106277;106278;106279;106280;106281;106282;106283;106284;106285;106286;106287;106288;106289;106290;106291;106292;106293;106294;106295;106296;106297;106298;106299;106300;106301;106302;106303;106304;106305;117917;117918;117919;117920;117921;117922;117923;117924;117925;117926;117927;117928;117929;117930;117931;117932;117933;11793…	1136;1137;1138;54386;116898;116899;116900;116901;116902;142191;142192;142193;142194;142195;142196;142197;142198;142199;142200;142201;142202;142203;142204;142205;142206;142207;142208;142209;142210;142211;142212;142213;142214;142215;142216;142217;142218;142219;142220;142221;142222;142223;142224;142225;142226;142227;142228;142229;142230;142231;142232;142233;142234;142235;142236;142237;142238;142239;…	1137;54386;116902;142206;142253;157709;157743;158379;158563;176946	1489	103	-1				MBP
E9PMR4;K4DIA7;P48509;E9PRJ3;K4DIB7	E9PMR4;K4DIA7;P48509;E9PRJ3	5;4;4;3;1	5;4;4;3;1	5;4;4;3;1	Tetraspanin;CD151 antigen	CD151	tr|E9PMR4|E9PMR4_HUMAN Tetraspanin OS=Homo sapiens OX=9606 GN=CD151 PE=1 SV=1;tr|K4DIA7|K4DIA7_HUMAN Tetraspanin (Fragment) OS=Homo sapiens OX=9606 GN=CD151 PE=1 SV=1;sp|P48509|CD151_HUMAN CD151 antigen OS=Homo sapiens OX=9606 GN=CD151 PE=1 SV=3;tr|E9PRJ3|	5	5	5	5	19.1	19.1	19.1	28.067	251	251;230;253;178;180	0	6.771	180320	223280	235760	138310	214890	228720	207790	220270	207040	172210	927550000	11				1665	9119;34243;53829;59557;64686	True;True;True;True;True	9760;36685;58193;64334;69909	17961;17962;69417;69418;109240;120928;120929;131677;131678	23985;23986;23987;93296;93297;146060;161979;161980;176458;176459;176460	23985;93297;146060;161979;176460			-1;-1;-1;-1;-1				CD151
P19075	P19075	4	4	4	Tetraspanin-8	TSPAN8	sp|P19075|TSN8_HUMAN Tetraspanin-8 OS=Homo sapiens OX=9606 GN=TSPAN8 PE=1 SV=1	1	4	4	4	16.5	16.5	16.5	26.044	237	237	0	14.712	281730	246450	338780	135130	235090	232680	148290	278830	245590	189070	3001800000	8				3454	17428;30596;36323;47555	True;True;True;True	18685;32792;38862;51538	34201;61838;73342;73343;97031;97032	45917;83315;98587;98588;98589;98590;130237;130238	45917;83315;98590;130238			-1				TSPAN8
P35625	P35625	1	1	1	Metalloproteinase inhibitor 3	TIMP3	sp|P35625|TIMP3_HUMAN Metalloproteinase inhibitor 3 OS=Homo sapiens OX=9606 GN=TIMP3 PE=1 SV=2	1	1	1	1	3.8	3.8	3.8	24.145	211	211	0.0038401	1.6531	56295	61708	83022	44496	59316	57461	49458	57735	59570	53911	37887000	1				3751	66353	TRUE	71684	134743	180486	180486			-1				TIMP3
A6NNI4;A0A2R8Y478;G8JLH6;P21926;A0A087WU13	A6NNI4;A0A2R8Y478;G8JLH6;P21926;A0A087WU13	12;12;12;12;7	12;12;12;12;7	12;12;12;12;7	Tetraspanin;CD9 antigen	CD9	tr|A6NNI4|A6NNI4_HUMAN Tetraspanin OS=Homo sapiens OX=9606 GN=CD9 PE=1 SV=1;tr|A0A2R8Y478|A0A2R8Y478_HUMAN Tetraspanin OS=Homo sapiens OX=9606 GN=CD9 PE=1 SV=1;tr|G8JLH6|G8JLH6_HUMAN Tetraspanin OS=Homo sapiens OX=9606 GN=CD9 PE=1 SV=2;sp|P21926|CD9_HUMAN	5	12	12	12	47.8	47.8	47.8	17.764	159	159;159;251;228;182	0	55.669	2299500	2693600	3159000	1657400	2202300	2171400	1553600	2180600	1939000	1764400	50809000000	84				661	2883;8475;8537;8538;11636;18135;18136;31129;50850;50851;57328;57329	True;True;True;True;True;True;True;True;True;True;True;True	3082;9070;9139;9140;12484;19437;19438;33354;55017;55018;61934;61935	6112;16695;16696;16697;16698;16825;16826;16827;16828;16829;22989;22990;22991;22992;22993;22994;22995;22996;35676;35677;35678;35679;35680;35681;35682;35683;35684;35685;35686;62859;62860;62861;62862;62863;62864;62865;62866;62867;62868;62869;62870;62871;62872;62873;62874;62875;62876;62877;62878;62879;103863;103864;103865;116228;116229	8375;22290;22291;22292;22293;22294;22295;22296;22467;22468;22469;22470;22471;22472;30722;30723;30724;30725;30726;30727;30728;30729;30730;30731;30732;30733;30734;30735;30736;30737;47971;47972;47973;47974;47975;47976;47977;47978;47979;47980;47981;47982;47983;47984;47985;47986;47987;47988;47989;84603;84604;84605;84606;84607;84608;84609;84610;84611;84612;84613;84614;84615;84616;84617;84618;84619;8462…	8375;22293;22471;22472;30735;47971;47988;84627;139045;139047;155494;155495			-1;-1;-1;-1;-1				CD9
[truncated: 7,083 more rows]
[truncated: 17 more columns]

## Sheet: d) PEG10 peptide-level data
	Sequence	Length	Start site	Modifications	Modified sequence	Oxidation (M) Probabilities	Oxidation (M) Score Diffs	Acetyl (Protein N-term)	Oxidation (M)	Missed cleavages	Proteins	Leading proteins	Leading razor protein	Gene names	Protein names	Type	Raw file	MS/MS m/z	Charge	m/z	Mass	Uncalibrated - Calibrated m/z [ppm]	Uncalibrated - Calibrated m/z [Da]	Mass error [ppm]	Mass error [Da]	Uncalibrated mass error [ppm]	Uncalibrated mass error [Da]	Max intensity m/z 0	Retention time	Retention length	Calibrated retention time	Calibrated retention time start	Calibrated retention time finish	Retention time calibration	Match time difference	Match m/z difference	Match q-value	Match score	Number of data points	Number of scans	Number of isotopic peaks	PIF	Fraction of total spectrum	Base peak fraction	PEP	MS/MS count	MS/MS scan number	Score	Delta score
[truncated: 19 more rows]
[truncated: 22 more columns]
