# Supplementary figures and images for: UBQLN2 restrains the domesticated retrotransposon PEG10 to maintain neuronal health in ALS
Source: eLife journal article supplement (doi:10.7554/elife.79452), 2023-03-23

**Figure 2 Supplement 1**

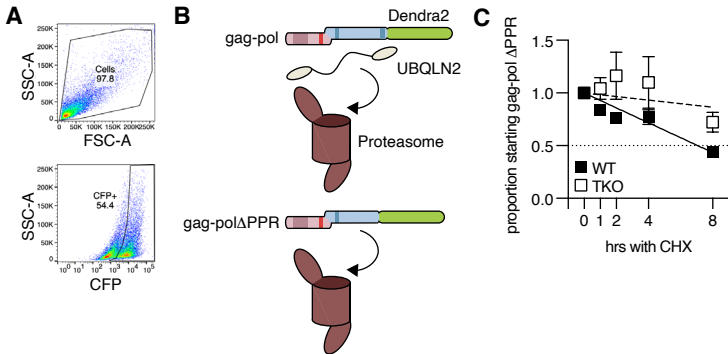

Supplement: supp [file elife-79452-supp-v1.zip]

**Figure 8 Supplement 1**

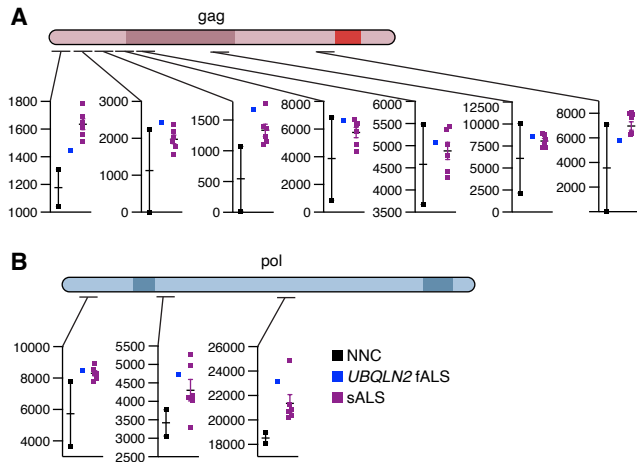

Supplement: supp [file elife-79452-supp-v1.zip]

**Figure 6 Supplement 1**

**A**

gag-pol

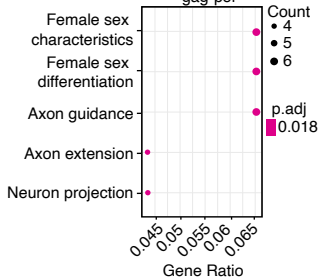

**B**

gag

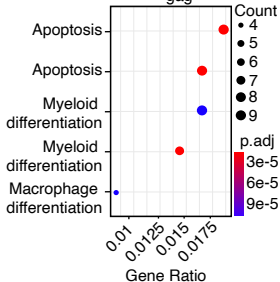

Supplement: supp [file elife-79452-supp-v1.zip]

**Figure 1 Supplement 1**

**A**

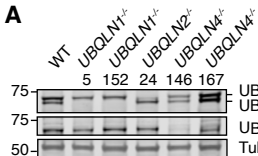

**B**

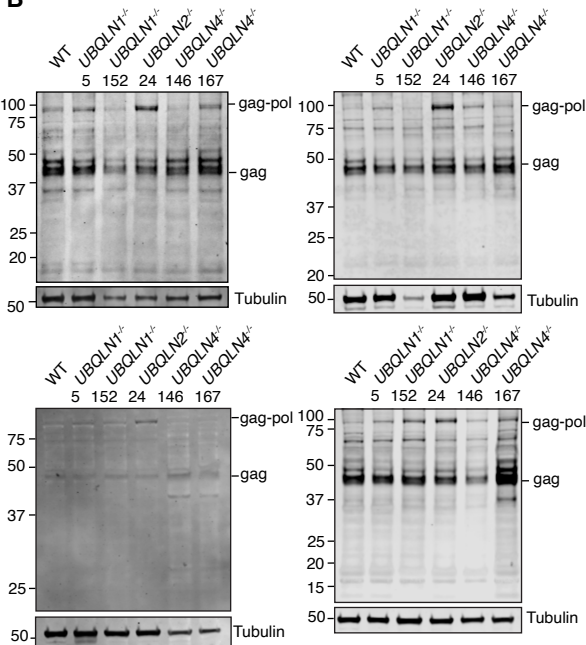

Supplement: supp [file elife-79452-supp-v1.zip › elife_poa_e79452_Figure_1_figure_supplement_1.pdf]

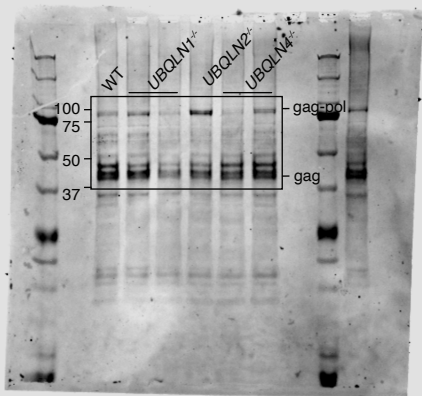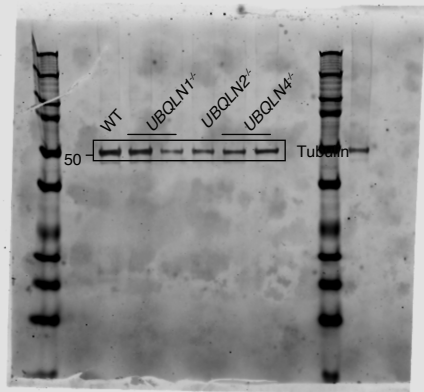

Supplement: supp [file elife-79452-supp-v1.zip › elife_poa_e79452_Figure_1_source_data_1.pdf]

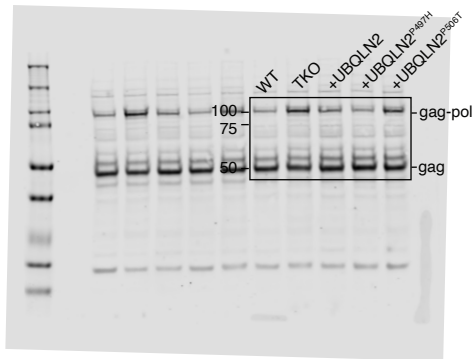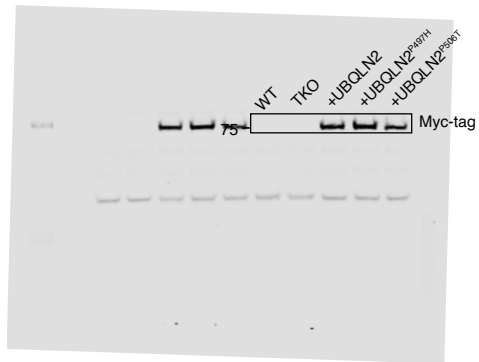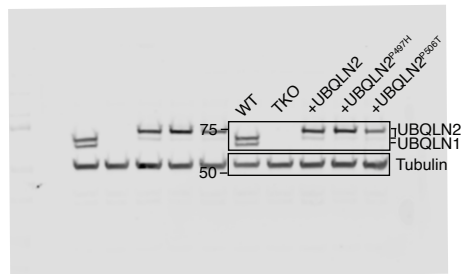

Supplement: supp [file elife-79452-supp-v1.zip › elife_poa_e79452_Figure_1Figure_1_figure_supplement_1_source_data_2.pdf]

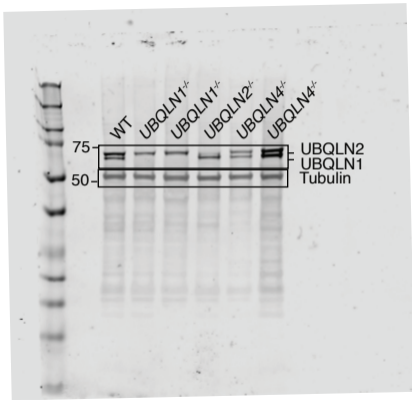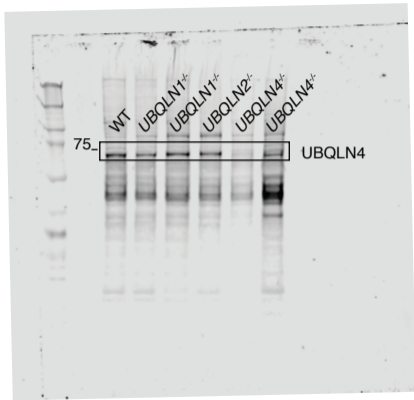

Supplement: supp [file elife-79452-supp-v1.zip › elife_poa_e79452_Figure_1_figure_supplement_1_source_data_1.pdf]

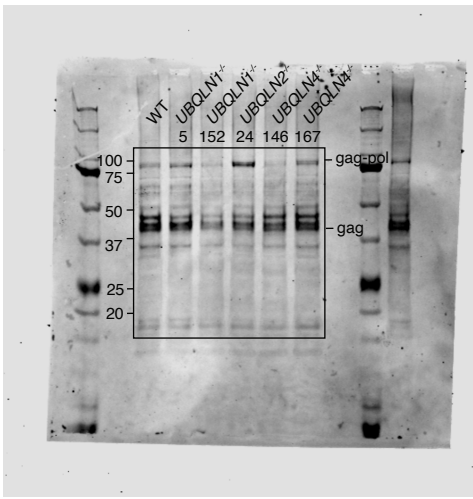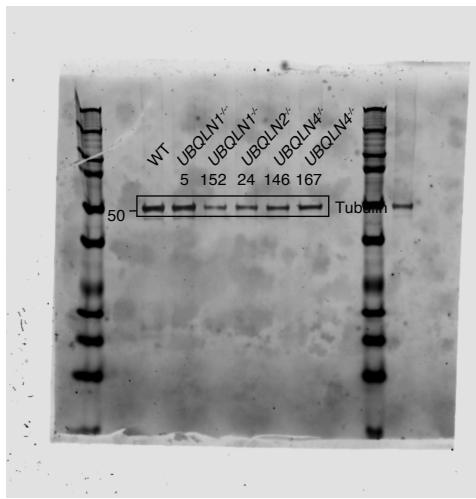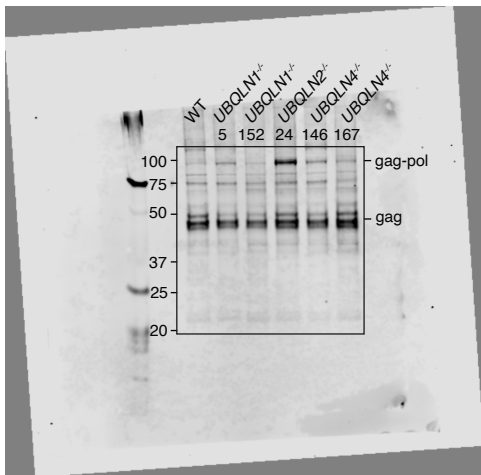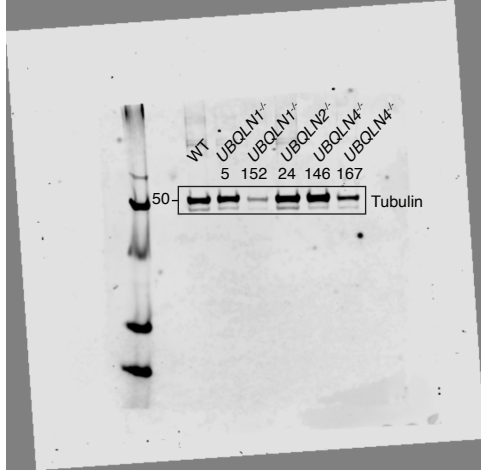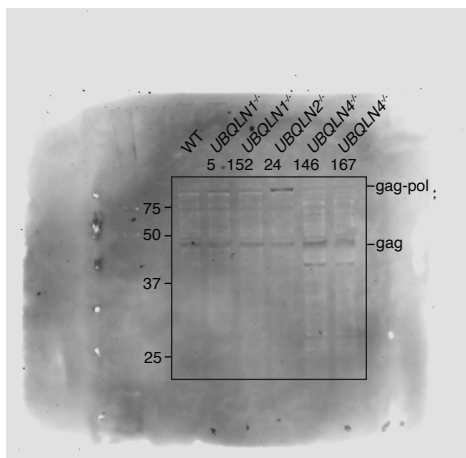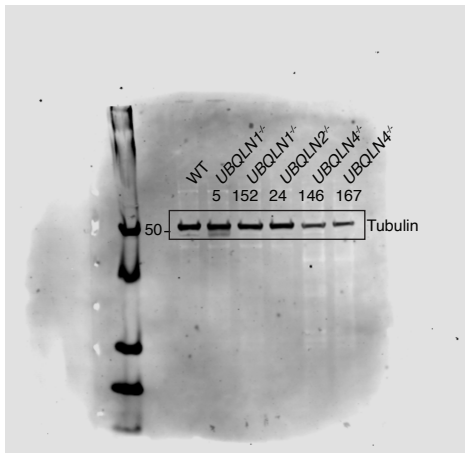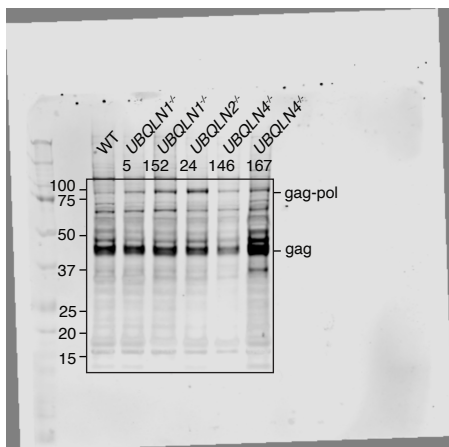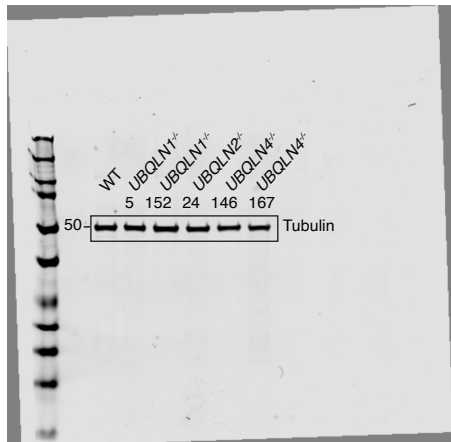

Supplement: supp [file elife-79452-supp-v1.zip › elife_poa_e79452_Figure_1_figure_supplement_1_source_data_2.pdf]

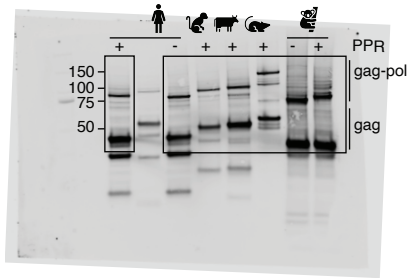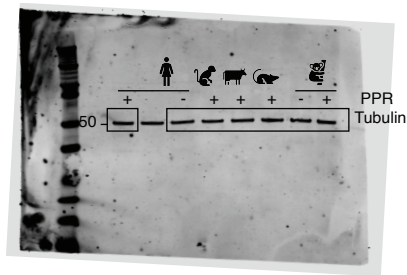

Supplement: supp [file elife-79452-supp-v1.zip › elife_poa_e79452_Figure_3_source_data_1.pdf]

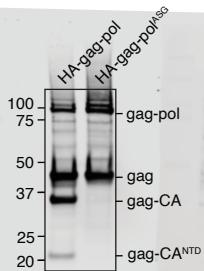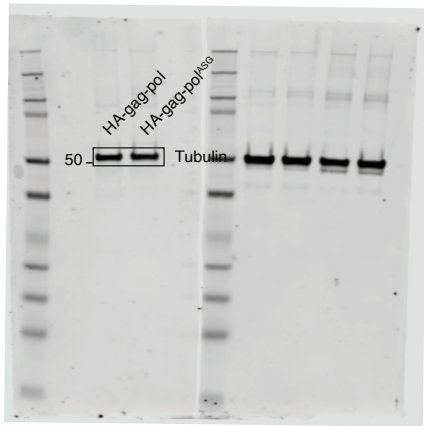

Supplement: supp [file elife-79452-supp-v1.zip › elife_poa_e79452_Figure_4_source_data_1.pdf]

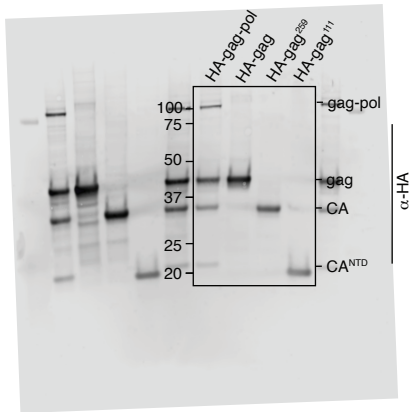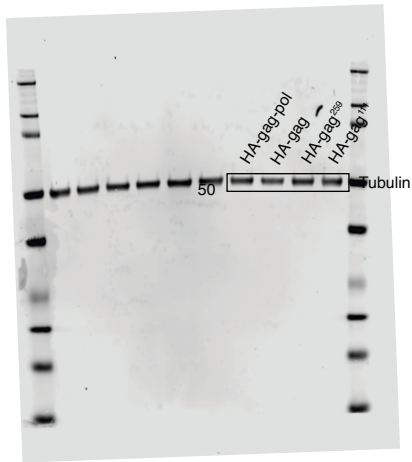

Supplement: supp [file elife-79452-supp-v1.zip › elife_poa_e79452_Figure_4_source_data_2.pdf]

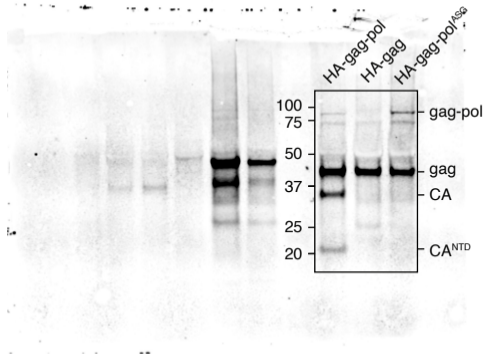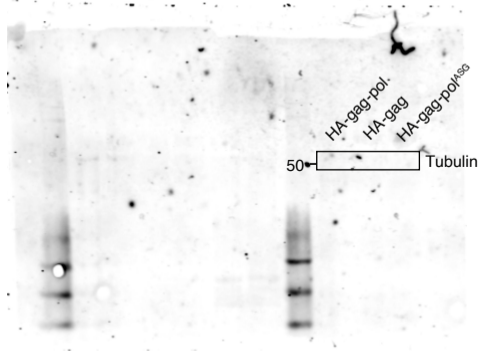

Supplement: supp [file elife-79452-supp-v1.zip › elife_poa_e79452_Figure_4_source_data_3.pdf]

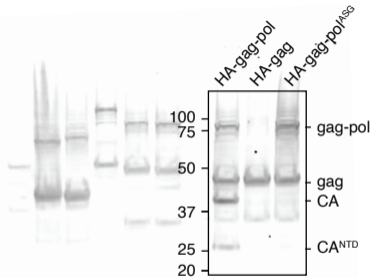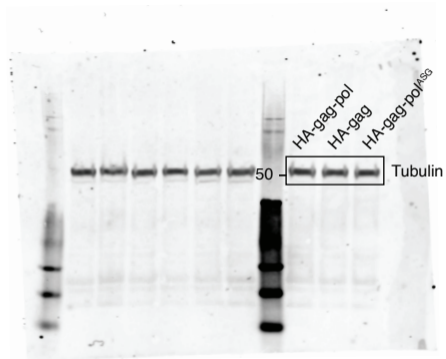

Supplement: supp [file elife-79452-supp-v1.zip › elife_poa_e79452_Figure_4_source_data_4.pdf]

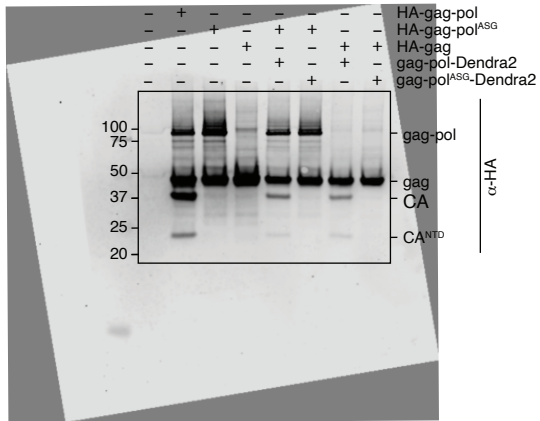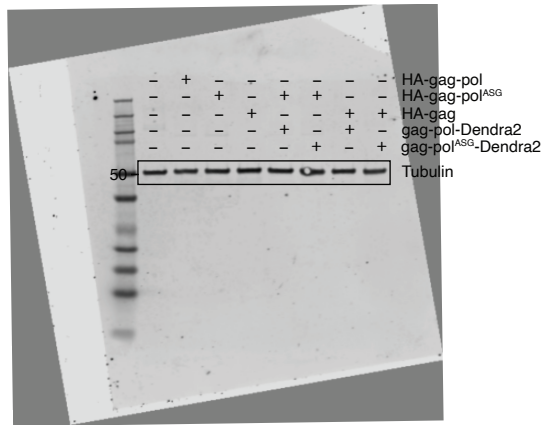

Supplement: supp [file elife-79452-supp-v1.zip › elife_poa_e79452_Figure_4_source_data_5.pdf]

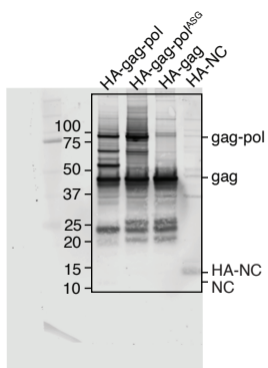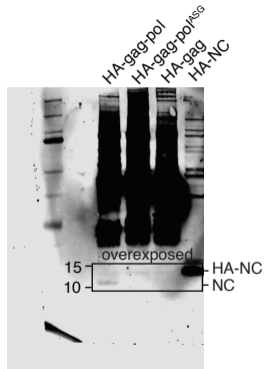

Supplement: supp [file elife-79452-supp-v1.zip › elife_poa_e79452_Figure_4_source_data_6.pdf]
